# Supplementary material for: Integrative small and long RNA omics analysis of human healing and nonhealing wounds discovers cooperating microRNAs as therapeutic targets
Source: eLife. 2022 Aug 12;11:e80322. doi: 10.7554/eLife.80322 (PMC9374442; doi:10.7554/eLife.80322)
Supplement: Figure 1—source data 1. [file elife-80322-fig1-data1.xlsx]

## Sheet: VU-specific DEmiRNAs
MiRNAs with expression change specifically in venous ulcers
By comparing VU with the Skin, Wound1, and Wound7, we list the miRNAs commonly changed (FDR < 0.05 and |log2(fold change)| ≥ 1) in these pair-wise comparisons.
Dysregulation	ID	VUvs.Skin_log2FC	VUvs.Skin_pvalue	VUvs.Skin_padj	VUvs.Wound1_log2FC	VUvs.Wound1_pvalue	VUvs.Wound1_padj	VUvs.Wound7_log2FC	VUvs.Wound7_pvalue	VUvs.Wound7_padj
Down	hsa-miR-1298-5p	-5.78693	3.42578e-15	1.3752e-13	-3.48799	1.43809e-05	0.000115458	-4.13737	3.99649e-06	0.000132119
Down	hsa-miR-141-3p	-3.68272	4.29547e-11	1.04959e-09	-2.37635	1.04115e-05	8.60479e-05	-1.96644	0.000237919	0.00417845
Down	hsa-miR-144-3p	-2.13186	0.00232124	0.00899679	-2.50986	2.6014e-06	2.43665e-05	-1.47261	0.00544712	0.0493755
Down	hsa-miR-149-5p	-2.9677	1.78679e-13	5.90692e-12	-1.78267	6.02703e-07	7.05664e-06	-1.65368	2.49868e-09	2.00609e-07
Down	hsa-miR-200a-3p	-2.87914	4.9823e-08	7.56772e-07	-1.62269	0.00232266	0.00876065	-1.64684	0.00132459	0.017312
Down	hsa-miR-218-5p	-2.72746	1.01545e-32	1.90227e-30	-1.69034	2.8031e-13	1.2118e-11	-1.34483	1.75119e-10	2.67308e-08
Down	hsa-miR-335-3p	-1.78691	0.000149599	0.000916047	-2.84325	4.35326e-07	5.31855e-06	-2.06369	0.000100743	0.00216549
Down	hsa-miR-3617-5p	-3.83441	8.66416e-07	1.09182e-05	-2.98152	0.000149187	0.000864362	-2.40086	0.00228471	0.0256801
Down	hsa-miR-375-3p	-4.5564	3.82204e-21	2.68498e-19	-3.59189	5.23451e-25	7.35449e-23	-2.68816	4.24198e-13	2.38399e-10
Down	hsa-miR-6510-3p	-7.13713	1.41185e-14	4.95911e-13	-5.40786	3.98806e-12	1.40081e-10	-4.85427	1.24706e-09	1.16808e-07
Up	hsa-miR-12136	2.18048	2.54161e-08	4.0811e-07	2.37617	7.43597e-09	1.22912e-07	1.68718	4.2354e-06	0.000132239
Up	hsa-miR-1248	1.9951	0.000584754	0.00280882	2.45217	1.39376e-06	1.45054e-05	2.63468	5.74913e-07	2.48539e-05
Up	hsa-miR-146a-5p	1.70306	4.4466e-07	5.8116e-06	2.50999	1.4879e-19	1.39367e-17	1.81656	4.52049e-05	0.00105855
Up	hsa-miR-147b-3p	1.86445	0.0031888	0.0118683	3.20639	4.63621e-11	1.24074e-09	1.88265	0.000664512	0.00982778
Up	hsa-miR-31-3p	7.16623	7.30402e-30	1.02622e-27	5.70551	3.31583e-29	9.31749e-27	1.35668	0.00413821	0.0400979
Up	hsa-miR-31-5p	5.55421	1.24115e-24	1.39506e-22	4.80505	3.69889e-25	6.92925e-23	1.34528	0.00169238	0.021136
Up	hsa-miR-3117-3p	2.52438	4.76818e-06	4.96244e-05	2.61365	1.53723e-08	2.33493e-07	2.65862	2.17765e-05	0.000556291
Up	hsa-miR-34a-5p	1.61554	8.74233e-07	1.09182e-05	1.89746	5.48891e-10	1.18645e-08	1.45049	7.391e-08	3.46145e-06
Up	hsa-miR-34b-3p	2.05349	1.88689e-06	2.16415e-05	2.56677	4.70758e-07	5.62906e-06	1.64487	0.000129461	0.00242524
Up	hsa-miR-34c-3p	2.08271	1.70413e-06	1.99525e-05	2.34453	2.11808e-07	2.76828e-06	1.77823	0.000104036	0.00216549
Up	hsa-miR-34c-5p	2.1876	5.79658e-19	3.61965e-17	2.8056	6.51336e-32	3.66051e-29	1.60626	2.15451e-10	2.67308e-08
Up	hsa-miR-424-5p	2.40682	3.22796e-13	1.00784e-11	1.21133	0.000564682	0.00273579	1.26573	3.81666e-08	2.14496e-06
Up	hsa-miR-450b-5p	3.38521	6.59591e-09	1.23563e-07	1.59205	0.00378202	0.0133679	1.59619	0.00191178	0.02286
Up	hsa-miR-455-3p	1.97834	2.51983e-09	4.88325e-08	1.82775	1.75729e-09	3.18579e-08	1.46141	1.98033e-06	7.41965e-05
Up	hsa-miR-512-3p	3.58478	7.72377e-08	1.1423e-06	3.08958	2.55904e-07	3.19596e-06	2.21269	0.000334674	0.00537391
Up	hsa-miR-516a-5p	4.46281	9.44784e-13	2.79457e-11	4.57455	3.24543e-14	2.02659e-12	3.38275	2.37818e-10	2.67308e-08
Up	hsa-miR-516b-5p	3.38631	1.29369e-05	0.000119189	4.46361	1.20769e-10	3.0851e-09	3.41518	1.07998e-06	4.33534e-05
Up	hsa-miR-517a-3p	3.39454	2.50553e-08	4.0811e-07	3.74307	6.51828e-14	3.33025e-12	3.24162	2.81135e-08	1.75553e-06
Up	hsa-miR-517b-3p	3.39454	2.50553e-08	4.0811e-07	3.74307	6.51828e-14	3.33025e-12	3.24162	2.81135e-08	1.75553e-06
Up	hsa-miR-542-3p	2.70184	2.39273e-15	1.1206e-13	2.46348	6.37101e-12	2.10618e-10	1.5428	5.09767e-08	2.60445e-06
Up	hsa-miR-6516-3p	1.73616	0.00107044	0.00469989	1.81253	0.000143305	0.000838933	1.50484	0.00209862	0.0240699
Up	hsa-miR-7704	1.31178	0.00539864	0.0180597	2.61708	2.66341e-13	1.2118e-11	1.34994	0.00387196	0.0400979

## Sheet: VU-specific DEmRNAs
MRNAs with expression change specifically in venous ulcers
By comparing VU with the skin, Wound1, and Wound7, we list the mRNAs commonly changed (FDR < 0.05 and |log2(fold change)| ≥ 0.58) in these pair-wise comparisons.
Dysregulation	GeneSymbol	VUvs.Skin_log2FC	VUvs.Skin_pvalue	VUvs.Skin_padj	VUvs.Wound1_log2FC	VUvs.Wound1_pvalue	VUvs.Wound1_padj	VUvs.Wound7_log2FC	VUvs.Wound7_pvalue	VUvs.Wound7_padj
Down	PLA2G2A	-2.48095	0.00139337	0.00623528	-5.44035	2.8624e-09	4.38962e-08	-4.75507	5.15531e-07	1.84081e-05
Down	GJB4	-5.60093	1.44836e-52	2.18503e-49	-2.58359	2.86778e-07	2.89876e-06	-3.69794	2.40388e-34	6.72637e-31
Down	POU3F1	-2.87268	3.45941e-10	7.13702e-09	-1.50782	4.15786e-05	0.000244906	-1.27079	0.000122359	0.00190151
Down	TRABD2B	-3.27449	1.16306e-17	6.43895e-16	-3.22224	4.39242e-26	7.06828e-24	-1.19399	1.00486e-05	0.000236407
Down	PLPP3	-1.96646	1.54315e-12	4.55361e-11	-2.25867	2.76378e-25	4.06782e-23	-0.659927	3.84682e-05	0.000739288
Down	LEPR	-2.15842	2.23922e-09	3.96263e-08	-1.16941	0.000177741	0.000883144	-0.794501	0.00227719	0.0181227
Down	PTGER3	-0.817074	0.00589291	0.0204313	-0.873274	0.00102163	0.00401118	-0.675832	0.00776465	0.0439342
Down	TGFBR3	-2.85982	1.58544e-26	2.25113e-24	-1.79313	3.22826e-16	1.39648e-14	-1.47313	5.22756e-15	1.23709e-12
Down	KIAA1324	-3.89853	4.58488e-27	7.00442e-25	-3.28015	1.94403e-32	6.01604e-30	-1.92985	1.04286e-08	6.02213e-07
Down	AMIGO1	-2.58151	3.14918e-13	1.03281e-11	-1.81578	6.41825e-08	7.6242e-07	-1.23921	0.000209138	0.00286503
Down	KCND3	-0.831275	0.00813622	0.0265249	-1.62248	3.16188e-11	6.79017e-10	-0.647907	0.0059631	0.0363478
Down	FLG	-4.11268	8.59601e-12	2.22759e-10	-1.66887	0.0191911	0.0474625	-2.48681	6.18895e-05	0.00109683
Down	FLG2	-4.54445	5.40186e-07	5.98119e-06	-2.31882	0.0167662	0.0424773	-3.54441	4.13698e-05	0.000786286
Down	LCE1D	-3.23406	1.4483e-06	1.45179e-05	-1.76228	0.00920469	0.0260045	-1.59155	0.00730997	0.0418718
Down	LCE1B	-3.80436	2.25922e-09	3.98634e-08	-2.30652	0.00498249	0.0155787	-2.68456	0.000466095	0.0053371
Down	LOR	-3.49039	0.000170626	0.0010343	-2.61219	0.00654093	0.0195257	-2.95273	0.00151435	0.0133309
Down	BCAN	-5.13092	1.21767e-19	8.49481e-18	-3.00721	1.13379e-05	7.76604e-05	-1.98429	0.00181947	0.0152813
Down	CD1A	-3.48962	6.83473e-11	1.56228e-09	-2.65812	2.5858e-07	2.63804e-06	-2.45023	1.0397e-06	3.44728e-05
Down	CD1C	-2.45193	1.61399e-09	2.95139e-08	-2.54209	5.9895e-11	1.23992e-09	-2.69167	5.52727e-08	2.66834e-06
Down	C1orf21	-1.62118	4.40662e-11	1.03772e-09	-0.889555	4.36216e-07	4.24572e-06	-0.889371	1.07621e-06	3.53919e-05
Down	PRG4	-3.98717	0.000540542	0.00279511	-5.44424	1.67346e-06	1.42937e-05	-5.67444	1.84097e-06	5.71173e-05
Down	MFSD4A	-4.1542	2.73706e-36	1.10112e-33	-2.55435	1.33612e-16	6.20216e-15	-1.80476	6.41344e-08	3.01182e-06
Down	DEGS1	-1.31341	7.62501e-05	0.000508152	-0.889888	0.000427178	0.00190033	-1.37153	7.40858e-10	5.62353e-08
Down	GREM2	-4.89811	1.65998e-14	6.54717e-13	-5.16229	2.48558e-22	2.52088e-20	-2.94589	2.50543e-07	1.01662e-05
Down	ALKAL2	-6.34135	6.39087e-15	2.70637e-13	-7.13898	2.8724e-29	5.97706e-27	-4.86791	9.27088e-12	1.19032e-09
Down	OSR1	-4.41525	5.71143e-36	2.1541e-33	-3.82668	2.29797e-31	6.02917e-29	-2.33162	9.53719e-12	1.21162e-09
Down	CGREF1	-1.4048	0.0065625	0.0222355	-1.34573	0.00295142	0.0100595	-1.40269	0.00122475	0.0112922
Down	VIT	-3.43739	4.55972e-20	3.41809e-18	-0.943696	0.0165141	0.0419686	-1.60909	3.27053e-05	0.000655705
Down	EPCAM	-3.65766	8.7641e-30	1.7629e-27	-3.72891	1.3003e-37	5.60476e-35	-2.3667	3.65931e-12	4.96227e-10
Down	EFEMP1	-0.925823	0.0122755	0.0369551	-0.981396	0.00191139	0.00695884	-1.61019	3.7267e-08	1.91237e-06
Down	CD207	-5.53706	2.25296e-30	4.85553e-28	-5.33901	8.14942e-36	2.98046e-33	-4.31307	4.5226e-25	6.06481e-22
Down	TACR1	-3.88875	2.88448e-17	1.5136e-15	-2.65929	3.3238e-09	5.02694e-08	-1.69826	0.00339767	0.0242069
Down	IL37	-4.99009	6.23334e-15	2.64895e-13	-3.37413	3.87506e-06	3.01729e-05	-3.75813	3.32936e-09	2.19574e-07
Down	LYPD6B	-3.44848	7.44252e-17	3.79003e-15	-1.01817	0.018394	0.0458766	-1.44216	0.000143891	0.00214397
Down	OSBPL6	-1.08216	0.00930948	0.029513	-1.15595	0.000102511	0.000542636	-0.889197	0.0033691	0.0240744
Down	ITPRID2	-1.27402	2.33117e-12	6.61999e-11	-0.582976	0.000653972	0.00274246	-0.664208	1.33878e-05	0.00030429
Down	AOX1	-1.61446	3.11112e-05	0.000230923	-1.51955	2.70891e-06	2.201e-05	-1.46227	5.841e-06	0.000149317
Down	DNER	-4.58985	2.36825e-20	1.84402e-18	-3.67854	1.01356e-19	7.41376e-18	-2.24511	3.22996e-06	9.0868e-05
Down	SLC16A14	-1.8785	8.04767e-08	1.0615e-06	-1.00121	0.000115898	0.000605268	-0.811852	0.00160746	0.013858
Down	SNORC	-3.84426	1.86242e-12	5.3903e-11	-2.32029	4.69793e-25	6.59294e-23	-1.18872	0.000357096	0.00430979
Down	NGEF	-2.8826	3.51735e-08	5.01191e-07	-1.60374	0.00073194	0.003017	-1.20055	0.00684609	0.0398964
Down	CHL1	-1.59749	1.18958e-06	1.21464e-05	-0.817439	0.00671097	0.0199642	-1.06927	7.82338e-05	0.00131872
Down	SUSD5	-3.27677	2.08896e-10	4.46224e-09	-1.45335	0.00334138	0.0111339	-1.72916	0.000185189	0.00262021
Down	CLEC3B	-4.13444	3.4057e-28	6.13484e-26	-2.02274	1.09335e-09	1.83784e-08	-1.80003	2.73262e-05	0.00056184
Down	LTF	-2.50172	5.27472e-05	0.000367556	-3.67796	1.15694e-12	3.17344e-11	-4.4799	7.98307e-11	8.16506e-09
Down	LRRC2	-3.90165	5.74573e-18	3.31795e-16	-3.70328	1.90797e-12	5.07208e-11	-2.37709	1.86511e-07	7.77377e-06
Down	IL17RD	-1.95436	2.33913e-16	1.14295e-14	-0.698507	0.011536	0.0312731	-0.602865	0.00267936	0.0202995
Down	ABHD6	-1.47174	1.07659e-11	2.75869e-10	-0.770377	0.000107773	0.000566266	-0.58355	0.000414541	0.00484756
Down	ABI3BP	-1.71242	0.00077758	0.00379483	-2.50718	2.77623e-08	3.54189e-07	-2.49445	1.81569e-08	1.0043e-06
Down	C3orf52	-3.0641	8.26456e-10	1.5872e-08	-1.75469	3.10666e-07	3.12452e-06	-1.69392	7.98417e-08	3.65004e-06
Down	ACPP	-1.15838	0.0112363	0.0343211	-1.03202	0.00536478	0.0165637	-0.94879	0.00909128	0.0491149
Down	PCOLCE2	-4.62289	2.31639e-12	6.6138e-11	-3.70122	2.15835e-10	4.10869e-09	-3.24223	2.19593e-08	1.19921e-06
Down	AADAC	-4.95303	4.29914e-12	1.16861e-10	-3.37131	3.25072e-07	3.24776e-06	-4.78022	1.60666e-16	5.24074e-14
Down	SPTSSB	-2.76968	8.55097e-07	9.03692e-06	-1.32777	0.0125267	0.0334404	-2.4202	1.12258e-06	3.65187e-05
Down	BCHE	-2.89903	1.62631e-08	2.45964e-07	-1.26954	0.0117668	0.0317421	-2.35308	2.64437e-09	1.77305e-07
Down	CLDN11	-3.49627	7.18072e-21	5.85568e-19	-2.43529	2.59894e-15	9.92613e-14	-2.02645	2.74797e-10	2.35214e-08
Down	CLDN1	-2.37416	9.50011e-09	1.50074e-07	-1.14792	0.00386341	0.012541	-1.62631	1.37677e-05	0.000310584
Down	PSAPL1	-6.93239	1.03023e-27	1.75125e-25	-4.92989	4.41317e-18	2.54845e-16	-4.60052	9.38158e-11	9.28085e-09
Down	ABLIM2	-2.2165	2.49149e-13	8.30656e-12	-1.8132	1.67387e-15	6.55908e-14	-0.735034	0.000661471	0.00708366
Down	SLIT2	-1.93707	2.7869e-11	6.80873e-10	-1.1993	1.34587e-07	1.46732e-06	-1.3663	1.19095e-10	1.12293e-08
Down	SLC34A2	-6.63587	1.41751e-08	2.17106e-07	-9.38807	9.00661e-17	4.35094e-15	-6.48373	2.43933e-08	1.3143e-06
Down	BTC	-6.87981	2.4515e-51	2.68974e-48	-4.03954	8.55608e-11	1.72393e-09	-4.68625	2.91168e-18	1.21176e-15
Down	DDIT4L	-1.92634	1.57095e-06	1.56434e-05	-1.56104	2.93868e-06	2.36604e-05	-1.66136	2.18963e-05	0.000458795
Down	ELOVL6	-0.890258	0.0126475	0.0378152	-1.14117	6.8998e-10	1.19991e-08	-0.70484	0.000205718	0.00282781
Down	ANK2	-2.31035	1.3418e-09	2.48377e-08	-1.1006	0.00254755	0.00887853	-1.78462	8.98184e-08	4.04485e-06
Down	NPY1R	-5.43835	5.2627e-21	4.4108e-19	-3.70214	1.12908e-12	3.10407e-11	-3.64094	8.76111e-11	8.81149e-09
Down	TPPP	-4.0317	2.6352e-27	4.15768e-25	-0.836656	0.00215567	0.0077064	-1.51733	9.11854e-06	0.000219664
Down	PDZD2	-3.21672	5.0194e-52	6.05791e-49	-0.970436	2.62949e-05	0.000162172	-1.06859	1.29823e-07	5.63611e-06
Down	NPR3	-1.64559	3.31348e-05	0.000244889	-0.985594	0.000166264	0.000832629	-1.20324	8.93332e-06	0.000216065
Down	LIFR	-2.36598	5.77596e-10	1.13963e-08	-2.03614	1.35648e-24	1.75321e-22	-1.21449	1.21582e-14	2.52996e-12
Down	GHR	-1.60542	1.57091e-06	1.56434e-05	-1.23164	1.06052e-08	1.4712e-07	-0.827482	5.2605e-05	0.000963413
Down	CCL28	-1.42508	2.91334e-05	0.000218206	-1.07	3.01467e-05	0.00018311	-0.905877	0.000289815	0.00369743
Down	FGF10	-1.88807	2.38052e-06	2.28928e-05	-2.43517	1.08956e-07	1.22097e-06	-2.24493	5.23149e-10	4.18138e-08
Down	EFNA5	-1.36745	0.000188158	0.00112587	-1.09989	0.000691265	0.00287091	-0.864524	0.0056949	0.0351569
Down	LVRN	-2.76702	5.11736e-12	1.38478e-10	-1.74303	0.00013816	0.000706846	-1.81285	1.87963e-05	0.000403869
Down	SLC12A2	-2.75138	4.87746e-21	4.14549e-19	-1.23128	1.04833e-11	2.46632e-10	-1.03779	3.32856e-08	1.72414e-06
Down	CXCL14	-3.41569	2.15556e-15	9.67117e-14	-1.4467	2.32795e-07	2.39115e-06	-1.84155	5.55776e-13	8.59956e-11
Down	SH3RF2	-1.9203	1.13898e-06	1.16593e-05	-0.930802	0.00884325	0.025166	-0.919671	0.00588228	0.0360189
Down	SLIT3	-2.75235	3.75358e-15	1.62957e-13	-0.862758	0.000294405	0.00137225	-0.609867	2.85574e-06	8.20618e-05
Down	GABRP	-3.80001	8.94895e-14	3.22403e-12	-3.28834	1.07421e-11	2.5174e-10	-2.36923	1.85262e-06	5.73316e-05
Down	ID4	-2.88868	1.17489e-20	9.45319e-19	-1.01482	8.0597e-05	0.000439352	-1.06979	5.69065e-05	0.00102661
Down	TNXB	-5.11779	6.89941e-27	1.01548e-24	-3.42799	1.1789e-13	3.75414e-12	-2.54495	3.46469e-09	2.26029e-07
Down	PI16	-6.42664	6.67025e-11	1.52757e-09	-4.93255	6.05378e-07	5.71699e-06	-5.71478	4.77899e-09	2.98848e-07
Down	KCNK5	-4.48105	5.4567e-19	3.48449e-17	-2.28803	8.20491e-08	9.46702e-07	-1.7698	1.17234e-05	0.000269504
Down	TFAP2B	-3.55664	4.15513e-10	8.48533e-09	-2.64703	4.52308e-06	3.45938e-05	-1.89718	0.00123752	0.0113931
Down	ARFGEF3	-3.90383	5.53694e-46	5.14041e-43	-1.88504	9.04368e-16	3.68744e-14	-1.7953	1.31138e-17	4.79608e-15
Down	ITGB8	-1.01335	0.000210815	0.00124295	-1.17399	3.00254e-06	2.40782e-05	-0.7631	0.00137993	0.0124194
Down	COBL	-3.63894	2.80353e-20	2.16896e-18	-1.60939	3.40412e-06	2.68877e-05	-1.29906	0.000132928	0.00200927
Down	EGFR	-1.27318	1.24485e-06	1.26572e-05	-0.824298	0.000427141	0.00190033	-0.645915	0.00567601	0.0350762
Down	WNT16	-3.50814	2.17316e-08	3.2142e-07	-2.51072	9.54033e-06	6.65178e-05	-2.714	7.89753e-06	0.000195719
Down	FLNC	-1.92428	1.65054e-05	0.000131574	-1.26456	0.0154104	0.03953	-1.28841	0.000329112	0.00406795
Down	ATP6V0A4	-7.08305	8.69546e-11	1.93984e-09	-5.07602	6.14746e-10	1.0847e-08	-4.27058	4.3866e-06	0.000116356
Down	PIP	-8.82064	1.7234e-14	6.77515e-13	-8.38512	1.55674e-12	4.1938e-11	-6.45536	1.40378e-05	0.000315596
Down	DMTN	-2.66806	6.30244e-12	1.67174e-10	-1.20101	3.55373e-08	4.44455e-07	-0.726695	0.000975866	0.00955985
Down	CLU	-2.98537	4.835e-15	2.06928e-13	-2.56786	2.80727e-18	1.68562e-16	-1.34052	3.69579e-06	0.000101705
Down	SCARA3	-2.22718	2.17393e-10	4.62736e-09	-1.74196	1.65178e-11	3.76138e-10	-1.77227	1.69754e-16	5.39149e-14
Down	SCARA5	-5.67743	5.49456e-22	5.06213e-20	-2.93825	2.89703e-09	4.42585e-08	-2.01619	2.28358e-06	6.7883e-05
Down	SFRP1	-2.43146	2.27212e-11	5.6193e-10	-1.75642	1.92115e-09	3.05084e-08	-1.5407	7.5756e-10	5.71437e-08
Down	SBSPON	-4.36984	7.52994e-20	5.47463e-18	-3.34204	1.47828e-13	4.61017e-12	-3.07472	5.31255e-13	8.3269e-11
Down	CA13	-1.32861	0.000328288	0.00182634	-1.30583	6.88193e-07	6.41283e-06	-0.860866	0.00108166	0.010328
Down	SYBU	-2.54671	9.71376e-28	1.67479e-25	-1.46103	2.31758e-08	2.99474e-07	-1.00744	8.88484e-06	0.000215757
Down	GPT	-4.00612	3.79054e-18	2.24255e-16	-2.0435	6.02577e-06	4.43175e-05	-1.56291	7.32183e-05	0.001257
Down	NFIB	-1.56935	9.20502e-11	2.04973e-09	-0.901554	1.25922e-05	8.49975e-05	-1.09323	2.4858e-08	1.32748e-06
Down	ACER2	-1.47252	3.51867e-09	6.00662e-08	-0.732765	0.00153399	0.00572296	-0.731536	0.00147597	0.0130789
Down	AQP3	-1.36167	0.00168985	0.0073257	-1.74916	4.50375e-06	3.44805e-05	-1.22709	0.000952743	0.00939432
Down	FAM189A2	-3.98782	2.54732e-28	4.72979e-26	-2.19095	7.99505e-12	1.92216e-10	-1.32107	7.24123e-05	0.00124671
Down	NTRK2	-3.57273	2.38118e-31	5.74768e-29	-2.5087	2.71692e-22	2.73254e-20	-1.93124	2.19063e-14	4.40645e-12
Down	WNK2	-6.70102	5.03622e-40	2.6427e-37	-3.46872	2.25254e-16	1.00688e-14	-2.87188	1.14211e-11	1.40654e-09
Down	TMOD1	-2.73398	8.80989e-17	4.44881e-15	-2.30377	1.82014e-11	4.12144e-10	-0.873333	0.00574337	0.0353476
Down	TMEM246	-1.97369	6.51989e-12	1.71809e-10	-1.22499	1.03844e-06	9.35994e-06	-0.955333	0.000484126	0.00551219
Down	KLF4	-2.40781	1.06403e-14	4.32383e-13	-0.802618	0.00055819	0.00239318	-0.96992	0.000153493	0.00223462
Down	PTPN3	-1.99809	5.75487e-07	6.32564e-06	-0.933144	0.007825	0.0226746	-0.934128	0.00497498	0.0320059
Down	SLC46A2	-3.39628	1.61955e-33	4.54565e-31	-0.902238	0.00415366	0.0133317	-1.47585	4.14781e-07	1.54031e-05
Down	PTGES	-1.25676	0.000417692	0.00224249	-2.5378	1.07224e-19	7.79573e-18	-1.30238	2.00817e-05	0.000428967
Down	AL354761.1	-7.11379	7.32789e-29	1.44984e-26	-4.15533	8.62637e-06	6.09553e-05	-4.13145	2.51108e-07	1.01662e-05
Down	AKR1C1	-1.23999	1.59764e-07	1.94561e-06	-0.971722	0.000980128	0.00386827	-0.7198	0.000173849	0.00249191
Down	AKR1C2	-1.95323	1.00958e-07	1.299e-06	-1.16023	1.3121e-05	8.81232e-05	-1.02284	0.00121833	0.0112675
Down	GATA3	-3.77253	5.47428e-33	1.4682e-30	-1.00415	0.000661544	0.00277036	-1.57316	7.00967e-10	5.35441e-08
Down	FZD8	-2.43064	1.36853e-08	2.0987e-07	-1.06773	0.0002429	0.00116179	-0.884143	0.00152647	0.0134131
Down	MSMB	-7.09522	1.9127e-10	4.12221e-09	-6.20873	4.16001e-07	4.08853e-06	-7.42181	7.99941e-13	1.20681e-10
Down	DKK1	-2.2468	6.94706e-09	1.12694e-07	-2.03472	1.7788e-08	2.35916e-07	-2.21853	3.65402e-07	1.3868e-05
Down	PLAC9	-3.18157	1.12299e-12	3.37148e-11	-0.753758	0.00397393	0.0128445	-1.33434	4.97187e-07	1.80197e-05
Down	MAT1A	-4.45482	6.89525e-21	5.66114e-19	-3.45429	2.66097e-16	1.17209e-14	-2.31666	9.18625e-07	3.11429e-05
Down	CDHR1	-4.47609	2.80999e-31	6.64976e-29	-2.68543	2.13142e-12	5.61662e-11	-2.65712	6.0397e-15	1.37534e-12
Down	BTBD16	-4.24507	1.19159e-26	1.71206e-24	-2.86728	5.21719e-11	1.0875e-09	-3.33684	1.99345e-22	1.33661e-19
Down	LMO1	-3.9458	1.26819e-19	8.6965e-18	-2.26344	1.70853e-05	0.000111582	-2.69915	2.19427e-09	1.52199e-07
Down	LYVE1	-2.39735	6.49379e-08	8.71786e-07	-1.51052	4.09972e-05	0.000241835	-1.19786	0.000246353	0.00327809
Down	SCGB1D2	-11.1409	1.69978e-27	2.81023e-25	-10.0029	2.88491e-20	2.26091e-18	-8.16276	4.602e-10	3.70487e-08
Down	SCGB2A2	-11.6099	8.02332e-30	1.66954e-27	-11.6856	7.08755e-32	2.03666e-29	-10.3385	5.53812e-21	3.03816e-18
Down	LRRN4CL	-3.44145	4.294e-09	7.22794e-08	-2.09613	9.09541e-06	6.39327e-05	-1.30701	0.00317349	0.0229347
Down	CST6	-3.45293	8.00482e-13	2.46455e-11	-1.30565	0.0127215	0.0338781	-1.44906	4.94908e-05	0.000914709
Down	GAL	-4.47599	0.00597086	0.0206305	-4.79313	1.24926e-16	5.88958e-15	-2.69113	8.39919e-06	0.000205618
Down	CRYAB	-2.7366	8.14179e-16	3.76488e-14	-1.45933	1.24774e-07	1.36527e-06	-0.741255	0.000867932	0.00873986
Down	POU2F3	-3.68808	6.0565e-17	3.09728e-15	-2.1986	5.47725e-08	6.60389e-07	-1.85728	3.99269e-06	0.000108044
Down	VSIG10L2	-5.98407	5.23757e-27	7.90152e-25	-4.27992	6.65827e-21	5.82309e-19	-4.74954	1.03136e-24	1.03729e-21
Down	ADAMTS8	-3.78736	2.53132e-07	2.96032e-06	-6.82293	2.46898e-36	9.3119e-34	-4.42915	5.53164e-16	1.55259e-13
Down	IGSF9B	-2.909	1.90629e-19	1.29253e-17	-1.73858	4.9724e-08	6.0435e-07	-0.932725	0.000340315	0.00416558
Down	PIK3C2G	-3.57059	1.70932e-08	2.57551e-07	-1.78214	0.000238012	0.00114226	-2.32252	3.25056e-07	1.25339e-05
Down	TMTC1	-1.02307	0.0003783	0.00205848	-1.52279	1.13429e-09	1.90135e-08	-0.785144	0.000676082	0.00720581
Down	KRT7	-5.28535	7.04678e-16	3.29642e-14	-3.0391	1.81731e-06	1.5435e-05	-2.31332	0.000351426	0.00425412
Down	KRT72	-5.88813	4.27421e-26	5.66873e-24	-3.34922	5.97095e-05	0.000338259	-4.18292	5.45901e-12	7.1614e-10
Down	KRT73	-7.28122	3.17396e-44	2.55377e-41	-4.26951	5.40143e-07	5.18615e-06	-5.13991	5.45848e-20	2.43994e-17
Down	KRT2	-8.7078	2.10047e-41	1.33424e-38	-6.29185	1.51197e-15	5.98295e-14	-6.76409	9.15668e-25	1.00465e-21
Down	KRT77	-7.03437	1.81765e-12	5.28606e-11	-4.80815	1.40808e-06	1.22525e-05	-4.32875	9.92961e-06	0.000234522
Down	KRT8	-4.08827	7.82211e-22	7.09812e-20	-1.48961	0.000528889	0.00228051	-1.21422	0.00588674	0.0360243
Down	DCD	-15.3032	1.66328e-45	1.43387e-42	-14.0149	4.19901e-42	2.53389e-39	-11.8588	3.17712e-13	5.32564e-11
Down	MUCL1	-6.33825	3.78357e-23	4.22814e-21	-5.51475	4.88235e-22	4.86985e-20	-4.1106	1.89557e-12	2.72352e-10
Down	WIF1	-11.3175	1.10806e-26	1.61122e-24	-9.58779	2.77935e-20	2.19242e-18	-6.85471	1.38805e-09	1.00918e-07
Down	NTN4	-2.20308	1.14354e-13	4.03551e-12	-0.703292	0.00358443	0.0117812	-0.606947	0.000807965	0.00829195
Down	SMAD9	-0.920252	0.000831769	0.00401706	-0.957981	9.45248e-06	6.59815e-05	-0.647088	0.00525937	0.033318
Down	CAB39L	-2.55678	7.86305e-14	2.86704e-12	-0.872174	0.000112342	0.000588226	-0.718721	0.000304935	0.0038416
Down	SOX21	-3.6546	2.54919e-12	7.18835e-11	-2.0786	7.60292e-06	5.45539e-05	-1.72422	0.000449566	0.00517237
Down	CLDN10	-8.3174	2.47396e-17	1.30385e-15	-8.40245	1.90496e-19	1.32132e-17	-7.12746	1.02305e-12	1.50575e-10
Down	ABHD12B	-3.57339	2.09409e-08	3.10868e-07	-1.93079	0.00452803	0.0143322	-2.43527	0.000122576	0.00190151
Down	BMP4	-2.87536	3.2954e-30	6.97758e-28	-1.59354	4.70389e-12	1.17539e-10	-0.74043	0.000191881	0.00270283
Down	PLEKHH1	-3.08515	6.94817e-25	8.6451e-23	-1.4974	6.51561e-07	6.11009e-06	-0.679796	0.00844558	0.0464796
Down	GALNT16	-4.50449	5.39074e-40	2.71087e-37	-2.04128	2.5554e-13	7.57767e-12	-2.06085	3.45331e-13	5.70932e-11
Down	SERPINA12	-7.08679	9.02009e-10	1.71439e-08	-5.3716	4.20265e-06	3.2514e-05	-5.23759	6.33299e-06	0.000159568
Down	CKB	-2.83827	6.67688e-27	9.94855e-25	-0.698731	0.0019411	0.00705587	-0.670556	0.000627072	0.00679338
Down	GATM	-2.15077	2.12161e-12	6.11115e-11	-0.74865	0.0104966	0.0289694	-1.27176	4.64278e-07	1.69799e-05
Down	SYNM	-3.28222	2.92699e-33	8.02861e-31	-2.08453	1.94256e-22	2.00382e-20	-1.1043	6.67274e-08	3.12145e-06
Down	CHP2	-6.82806	2.8466e-35	9.54323e-33	-2.68206	3.00026e-05	0.000182378	-4.50522	1.35857e-16	4.55461e-14
Down	PYDC1	-2.69892	4.17394e-06	3.83958e-05	-1.70472	0.00371024	0.0121319	-3.03667	2.3156e-07	9.57087e-06
Down	PLLP	-4.41759	6.83795e-36	2.50083e-33	-1.79254	3.89863e-09	5.82334e-08	-1.88714	1.45492e-11	1.73855e-09
Down	CCDC113	-1.49459	3.75191e-10	7.68791e-09	-0.731481	0.00304197	0.0103041	-0.800746	0.000181986	0.00258095
Down	CES4A	-2.70525	2.24569e-23	2.55691e-21	-0.969313	4.4391e-05	0.000259823	-0.760392	2.16876e-05	0.000456007
Down	GAN	-2.90906	2.70011e-21	2.36142e-19	-0.831767	0.00121676	0.00468123	-1.38374	8.16453e-09	4.83028e-07
Down	FAM57A	-1.31859	2.00161e-06	1.95765e-05	-0.678822	0.00207237	0.00747055	-0.907126	3.19503e-05	0.000643753
Down	RTN4RL1	-3.11623	4.60812e-11	1.07991e-09	-1.77209	1.33045e-06	1.16865e-05	-0.933981	0.00209274	0.016974
Down	RNF227	-3.4252	7.50184e-18	4.29098e-16	-1.61897	5.58258e-06	4.14622e-05	-1.45047	1.15145e-05	0.000265207
Down	ALDH3A2	-2.1143	2.17994e-19	1.46981e-17	-0.683931	0.00200335	0.00726296	-0.75858	4.15393e-06	0.000111408
Down	TLCD1	-1.9025	1.86862e-15	8.4466e-14	-1.22258	3.07112e-09	4.67406e-08	-0.801052	0.00256569	0.0196232
Down	STAC2	-9.08338	1.46987e-54	2.53427e-51	-7.11383	8.07835e-69	4.87488e-65	-6.33449	2.70134e-44	1.63012e-40
Down	PPP1R1B	-7.35018	5.22947e-23	5.68599e-21	-4.69369	4.60304e-14	1.53042e-12	-3.55332	1.18649e-07	5.22618e-06
Down	KRT10	-5.02018	5.37112e-18	3.1468e-16	-2.82383	2.8162e-05	0.000172619	-3.84128	2.8655e-10	2.43547e-08
Down	KRT19	-5.74519	3.35336e-22	3.21204e-20	-3.04567	8.47078e-09	1.19572e-07	-2.38878	1.46476e-05	0.000326166
Down	PRR15L	-5.80347	8.61131e-33	2.25934e-30	-4.36875	4.4008e-17	2.23165e-15	-2.99679	5.01438e-07	1.80652e-05
Down	TMEM100	-1.69214	1.44106e-06	1.44574e-05	-1.5266	1.44638e-06	1.25495e-05	-1.50278	4.76717e-06	0.000125897
Down	ABCA8	-4.13432	4.63217e-11	1.08135e-09	-2.22705	0.000251483	0.00119541	-2.7461	0.00014316	0.00213572
Down	SOX9	-2.53874	2.53363e-10	5.31798e-09	-1.10239	1.49295e-05	9.92751e-05	-1.08831	6.10092e-06	0.000154689
Down	GNAL	-1.19413	3.9903e-06	3.67625e-05	-0.859636	0.000182617	0.000905133	-0.639805	0.00289655	0.0215244
Down	ZBTB7C	-3.25266	5.66524e-14	2.1103e-12	-1.94663	1.63396e-07	1.75916e-06	-1.43877	3.12733e-05	0.000632223
Down	CRLF1	-3.27769	4.27873e-12	1.16569e-10	-1.99885	6.15458e-07	5.80763e-06	-1.56246	3.55391e-05	0.000697433
Down	RHPN2	-4.59913	1.88596e-36	7.84884e-34	-2.83453	3.42152e-18	2.02423e-16	-1.9343	8.60859e-08	3.89128e-06
Down	HSPB6	-3.01611	2.66571e-08	3.89026e-07	-1.2073	0.00357732	0.011761	-1.2608	0.000500752	0.00565349
Down	IGFL3	-4.53565	4.02702e-23	4.45891e-21	-2.57049	0.000136191	0.000697958	-2.46938	5.07481e-05	0.000936512
Down	MYH14	-5.69577	1.85619e-30	4.07315e-28	-2.29197	4.71898e-08	5.77036e-07	-2.30738	2.3459e-09	1.60867e-07
Down	KLK1	-5.71934	3.66272e-40	2.00933e-37	-3.25616	1.3209e-11	3.05402e-10	-3.34342	1.11945e-16	3.86019e-14
Down	ISM1	-2.63832	4.12513e-13	1.3241e-11	-1.96984	3.97452e-05	0.00023491	-1.74763	6.12963e-06	0.000155091
Down	PCSK2	-3.88108	6.51186e-14	2.39609e-12	-1.62927	0.00518012	0.0160882	-1.6363	0.00291174	0.0215859
Down	KCNK15	-1.81762	0.0125161	0.0375425	-2.87363	2.97022e-07	2.99729e-06	-1.71476	0.00386042	0.0265327
Down	PTGIS	-2.33119	0.000641568	0.00322898	-2.58613	0.000326854	0.00150393	-2.42841	0.00142984	0.0127638
Down	CLDN8	-5.42082	4.84458e-13	1.54272e-11	-4.34155	1.17368e-07	1.30075e-06	-2.74701	0.00572703	0.0352831
Down	LIF	-1.49574	7.66767e-06	6.63853e-05	-3.61137	2.356e-10	4.44985e-09	-2.59456	2.78754e-08	1.4564e-06
Down	SOX10	-4.6253	6.84864e-15	2.88001e-13	-3.02907	1.93762e-08	2.55018e-07	-1.94119	0.000360545	0.00433408
Down	TAFA5	-2.81992	2.32942e-11	5.73751e-10	-1.12473	1.87096e-05	0.000121011	-1.03643	0.000311061	0.00391469
Down	MAOB	-1.26353	0.00119523	0.00547862	-1.14554	0.00172922	0.00638226	-0.889295	0.00821828	0.045708
Down	NAP1L2	-2.15895	1.2364e-07	1.55277e-06	-1.38287	0.000231557	0.00111831	-1.18046	0.00426579	0.0285546
Down	PLP1	-3.25921	3.20398e-07	3.66807e-06	-1.49605	0.0201741	0.0494479	-1.70528	0.00389664	0.0266904
Down	RNF128	-2.09335	8.64278e-08	1.12889e-06	-0.823714	0.00386588	0.0125457	-0.85965	0.000552261	0.00612372
Down	CHRDL1	-4.25147	2.57905e-05	0.000196011	-3.81262	8.01242e-05	0.00043717	-3.29376	0.000509509	0.00572558
Down	LGALS7B	-3.41697	8.18364e-11	1.83926e-09	-1.38713	0.00741006	0.0217385	-1.79255	0.00158817	0.0137698
Down	HLA-B	-5.47497	5.67252e-05	0.000390986	-5.63325	0.00033461	0.00153581	-5.61572	5.7177e-05	0.00102995
Up	SCNN1D	1.11332	0.00499921	0.0179413	2.99873	2.2952e-20	1.85911e-18	1.57576	9.47726e-07	3.16845e-05
Up	FBLIM1	1.13513	0.00157562	0.00692042	1.01234	3.43578e-10	6.34043e-09	0.617009	6.72765e-07	2.34671e-05
Up	IGSF21	1.79135	0.000685003	0.00341624	2.99688	3.62642e-12	9.19479e-11	2.34946	6.10867e-08	2.90902e-06
Up	CSMD2	3.66105	1.98448e-26	2.75296e-24	3.19455	3.8676e-32	1.13849e-29	1.70045	9.80952e-11	9.47566e-09
Up	BMP8A	2.64875	1.94592e-12	5.61849e-11	2.75222	2.78632e-15	1.06082e-13	1.16946	0.000378833	0.00451792
Up	BMP8B	0.880885	0.0085053	0.0275128	1.41722	2.08036e-06	1.74118e-05	0.932192	0.00494568	0.0318683
Up	BTBD19	1.0099	0.00343719	0.0132155	1.24451	4.65996e-06	3.55281e-05	0.867505	0.000507297	0.00570602
Up	SGIP1	2.53707	6.03397e-07	6.60235e-06	1.62524	1.80595e-05	0.000117435	2.0969	1.85234e-09	1.30736e-07
Up	GBP6	2.66241	2.48608e-08	3.64575e-07	3.05825	5.92543e-12	1.45354e-10	1.83623	1.44063e-05	0.000321386
Up	COL11A1	6.42732	9.96901e-62	2.00527e-58	6.7938	2.62166e-54	5.27346e-51	4.78466	3.09353e-50	3.73358e-46
Up	KCNA3	2.18002	1.04383e-05	8.75471e-05	2.26163	2.29525e-10	4.34191e-09	1.4552	0.00131704	0.0119604
Up	PTPN22	2.95429	4.9538e-14	1.86254e-12	1.02067	0.0010235	0.0040171	0.673722	0.00112222	0.0106311
Up	TENT5C	2.74216	5.37856e-09	8.88015e-08	2.66872	3.80626e-10	6.92877e-09	2.75818	3.96169e-10	3.2749e-08
Up	GJA5	2.09519	8.79917e-07	9.24258e-06	1.02899	0.00863059	0.0246364	1.19359	0.00156042	0.0136074
Up	LCE3D	2.92625	2.80382e-07	3.24131e-06	2.48269	4.80609e-07	4.64781e-06	1.69728	0.000145946	0.0021586
Up	LCE3A	7.62192	2.45675e-22	2.41061e-20	4.07767	4.99049e-06	3.7673e-05	2.90123	4.36636e-08	2.18662e-06
Up	SPRR1A	5.53717	1.02543e-18	6.3466e-17	3.35316	2.22164e-10	4.20925e-09	1.25904	0.00377147	0.0260997
Up	SPRR3	13.0913	2.52576e-34	8.02194e-32	10.151	7.71281e-30	1.66225e-27	3.36929	3.11253e-07	1.21151e-05
Up	SPRR2D	5.31023	1.40197e-14	5.60276e-13	2.42144	1.82148e-07	1.93176e-06	2.50138	4.33472e-09	2.73905e-07
Up	SPRR2A	9.2444	3.51437e-19	2.30516e-17	3.98803	2.11403e-13	6.41061e-12	2.45234	1.42608e-09	1.02449e-07
Up	SPRR2E	2.75411	2.65224e-05	0.000200941	1.53531	0.00478502	0.0150274	1.84069	0.0018385	0.015345
Up	SPRR2F	12.6653	6.95749e-13	2.15308e-11	4.49227	9.93129e-05	0.000527092	4.9048	3.08233e-05	0.000624846
Up	AIM2	3.74711	8.20902e-11	1.84154e-09	1.32896	0.000611308	0.00258601	1.44458	9.46039e-05	0.00153878
Up	SLAMF8	3.38769	8.03425e-31	1.82953e-28	2.72342	1.73227e-22	1.80231e-20	1.13739	0.000314891	0.00395465
Up	SLAMF7	3.0917	6.76358e-15	2.85418e-13	2.43565	3.8303e-17	1.95054e-15	1.18399	2.21676e-05	0.000463676
Up	RCSD1	1.20779	0.000105656	0.00067792	1.10318	0.00120097	0.00463083	0.816461	0.00444008	0.0293952
Up	FMO3	2.29356	5.78049e-12	1.54689e-10	3.09465	7.96137e-23	8.65637e-21	2.60918	3.921e-24	2.95766e-21
Up	FMO1	3.38163	8.94532e-10	1.70286e-08	5.9887	6.2224e-34	2.02968e-31	1.54311	0.000447946	0.00515865
Up	PTPN7	2.07976	1.09874e-12	3.30691e-11	0.850104	0.00192339	0.0070004	0.988333	0.00246087	0.0190875
Up	LAX1	2.07321	7.70569e-06	6.66666e-05	2.37141	2.90812e-08	3.69065e-07	2.28543	1.05668e-06	3.48445e-05
Up	FCMR	3.62792	3.61229e-19	2.35658e-17	1.63515	1.4686e-05	9.77097e-05	1.19583	0.00800561	0.0450232
Up	TRAF5	1.17036	0.000750073	0.00369344	1.34686	3.06475e-14	1.04783e-12	0.972465	3.01672e-07	1.18595e-05
Up	NID1	1.64116	7.13456e-07	7.67558e-06	1.9762	1.40618e-21	1.30548e-19	0.829295	8.66987e-05	0.00142751
Up	SMYD3	1.24344	0.000119868	0.000755056	1.87761	4.25033e-12	1.07092e-10	0.947944	0.00033422	0.00410764
Up	EHD3	0.999012	8.27127e-05	0.000547291	0.727245	3.40053e-05	0.000204387	0.696211	0.000272778	0.00355366
Up	ANTXR1	0.965691	0.0011031	0.00510872	1.80988	3.52383e-11	7.48752e-10	1.11926	7.86531e-06	0.000195609
Up	EVA1A	1.06807	0.00414	0.0153363	1.576	9.80187e-15	3.5208e-13	1.40022	2.89285e-13	4.98768e-11
Up	MAL	1.4206	0.00951069	0.0300012	2.99864	2.40112e-09	3.74892e-08	2.27882	1.081e-05	0.000251379
Up	RFX8	2.69617	9.60719e-13	2.92064e-11	1.24033	3.80486e-06	2.97608e-05	0.806694	0.00113191	0.0106981
Up	GALNT5	2.67193	4.81919e-08	6.60941e-07	4.86493	9.27166e-25	1.24333e-22	1.23351	0.000467748	0.0053504
Up	DHRS9	2.11653	2.56046e-07	2.98601e-06	1.15195	2.97688e-06	2.39042e-05	1.17	1.35756e-05	0.000306823
Up	CHN1	2.69193	1.40248e-13	4.86376e-12	2.12872	1.53057e-22	1.6063e-20	1.00099	1.96156e-05	0.000419753
Up	SLC40A1	1.91155	3.65491e-07	4.14188e-06	2.95556	1.46116e-25	2.26086e-23	1.21051	0.000381267	0.00452459
Up	IGFBP2	1.31678	0.0170238	0.0477814	3.7087	2.58342e-15	9.92613e-14	1.83048	3.50717e-05	0.000690506
Up	COL4A4	2.17748	2.67532e-05	0.000202562	1.64838	0.0001611	0.000808782	2.07269	1.78745e-07	7.51665e-06
Up	SP140	2.70445	9.22151e-13	2.82865e-11	0.906414	0.0123815	0.0331481	1.36135	0.000840166	0.00854971
Up	SP140L	1.2658	1.57309e-07	1.92357e-06	0.740936	0.000135023	0.000692713	0.67636	0.00647271	0.0384801
Up	ARMC9	0.796461	3.03321e-07	3.48646e-06	1.34767	1.82435e-20	1.50809e-18	0.894253	4.60461e-10	3.70487e-08
Up	TMEM158	2.58118	1.83512e-20	1.46676e-18	1.22744	4.73759e-06	3.60517e-05	0.698429	0.00176246	0.0149061
Up	UCN2	0.810494	0.0177962	0.0494398	2.88529	1.69359e-16	7.77185e-15	0.834103	0.00348507	0.0246116
Up	WNT5A	3.51735	8.3354e-30	1.70508e-27	4.81779	7.34346e-54	1.26612e-50	2.62154	8.5479e-21	4.29853e-18
Up	EAF2	2.48119	2.91939e-06	2.76781e-05	1.06254	0.000232389	0.00112143	0.981672	0.000229968	0.00310629
Up	CHST2	1.85074	5.61101e-05	0.000387075	0.819146	0.00202985	0.00734581	1.10616	1.73331e-07	7.34011e-06
Up	C3orf80	2.73861	1.20052e-13	4.21193e-12	3.21536	1.19547e-19	8.48713e-18	0.953103	0.000311606	0.00391747
Up	TNIK	1.35455	4.47789e-06	4.09422e-05	1.39779	5.98061e-08	7.13946e-07	0.866174	0.00454924	0.0299862
Up	KLHL6	2.74611	3.18223e-18	1.89194e-16	1.60075	1.67618e-08	2.23041e-07	1.23272	3.20761e-06	9.045e-05
Up	SLC2A9	1.50832	6.41429e-19	4.05309e-17	1.61877	1.27985e-16	5.98703e-15	1.17361	8.27033e-08	3.75243e-06
Up	SEL1L3	2.5287	4.75837e-13	1.51928e-11	1.02366	0.000863665	0.00348614	1.01413	0.000630488	0.00681232
Up	RHOH	2.82048	8.2353e-36	2.92329e-33	2.01531	2.32846e-27	4.07278e-25	1.28583	0.000351131	0.00425412
Up	TMPRSS11D	8.70462	9.91287e-14	3.52916e-12	4.902	1.62252e-17	8.74207e-16	1.78998	0.000535337	0.00598239
Up	JCHAIN	2.98661	0.00377412	0.014221	3.02165	0.00185737	0.0067888	3.66587	5.00319e-06	0.000130984
Up	CXCL6	8.85639	4.5063e-22	4.21601e-20	1.57337	0.011215	0.0305194	2.96352	6.93423e-08	3.21882e-06
Up	ARHGAP24	0.688332	0.00862901	0.0278013	1.22865	2.55502e-09	3.9534e-08	0.768426	0.000158512	0.00229937
Up	ENPEP	2.4448	4.91588e-19	3.17271e-17	2.07806	1.13783e-20	9.80892e-19	0.872765	0.000430036	0.00499048
Up	ARSJ	1.26438	1.86961e-05	0.000147194	0.980806	4.33715e-06	3.34046e-05	0.628474	0.0026652	0.0202177
Up	TBC1D9	0.778791	0.00305022	0.0119717	1.15296	1.95355e-08	2.56834e-07	0.693154	1.75164e-05	0.00038177
Up	EDNRA	1.42361	2.10737e-06	2.05443e-05	1.41427	4.98803e-12	1.23615e-10	0.845569	0.00160417	0.013858
Up	GUCY1A1	1.00842	0.00394199	0.0147066	2.1211	2.27892e-18	1.38911e-16	1.23454	2.61006e-07	1.05003e-05
Up	TENM3	2.76588	4.83908e-22	4.49252e-20	3.02029	4.10804e-44	3.09874e-41	2.16951	1.2349e-24	1.14646e-21
Up	SEMA5A	0.585177	0.00488341	0.0176144	2.03403	2.67313e-20	2.1225e-18	0.79854	3.66708e-06	0.000101277
Up	ADAMTS12	2.86129	7.47491e-23	7.91357e-21	3.77112	1.28129e-57	5.15462e-54	0.800477	4.59139e-07	1.68494e-05
Up	SLC1A3	1.67509	5.62041e-08	7.63023e-07	0.584651	0.00477825	0.0150101	1.0184	7.14269e-09	4.31026e-07
Up	ITGA1	1.5962	6.3502e-05	0.00042984	1.66393	3.84615e-14	1.28942e-12	0.931817	1.52799e-05	0.000338929
Up	ENC1	1.77848	4.90134e-10	9.76144e-09	1.47461	1.98468e-07	2.08832e-06	1.22724	2.06325e-06	6.22535e-05
Up	RASGRF2	1.2094	2.77956e-05	0.000209666	1.20484	2.30968e-08	2.98773e-07	0.780297	0.0006888	0.00732434
Up	PRR16	1.99362	1.46285e-08	2.22918e-07	2.06297	8.89762e-10	1.51889e-08	0.82709	0.00916178	0.0493632
Up	PITX1	4.14004	9.67055e-14	3.45307e-12	3.37845	7.89771e-13	2.21154e-11	2.0672	7.68977e-07	2.6441e-05
Up	MSX2	1.1673	4.32828e-05	0.000310756	1.20622	2.57863e-05	0.00016009	1.05055	6.54419e-05	0.00114966
Up	IRF4	1.39485	0.000762052	0.00373415	1.76654	6.83444e-07	6.38427e-06	1.63266	1.14535e-05	0.000264812
Up	TXNDC5	1.31715	0.00897511	0.0286372	1.78186	4.77149e-08	5.82865e-07	1.52872	1.85937e-06	5.73932e-05
Up	PGBD1	0.722444	0.0046109	0.0168073	1.22214	2.79709e-06	2.26109e-05	0.77745	0.000343324	0.00419289
Up	CPNE5	1.807	1.47843e-05	0.000119193	1.76301	7.93016e-09	1.13131e-07	2.26134	3.51075e-11	3.85193e-09
Up	PTK7	1.08075	0.000115133	0.000727891	2.87335	4.27246e-48	4.68766e-45	0.949221	3.71115e-11	4.03512e-09
Up	TNFRSF21	1.86908	1.5187e-13	5.23689e-12	1.04102	8.70729e-07	7.98543e-06	0.643696	2.61654e-05	0.000538891
Up	COL12A1	2.56482	1.24842e-17	6.88002e-16	2.79229	2.22398e-23	2.60595e-21	1.08628	0.000147242	0.0021682
Up	FILIP1	1.00545	0.00991027	0.0310435	1.3912	2.84033e-05	0.000173834	0.863047	0.00466399	0.0305425
Up	BVES	0.932987	0.0005504	0.00283395	1.00762	0.000449975	0.0019871	0.633784	0.00658036	0.0388734
Up	PRDM1	1.60837	1.80777e-08	2.70025e-07	1.40791	2.16719e-08	2.82156e-07	1.09439	4.4868e-05	0.000840858
Up	COL10A1	5.53676	9.40804e-29	1.83138e-26	7.6679	3.80205e-40	1.91196e-37	1.92152	3.81755e-07	1.44433e-05
Up	CEP85L	0.81097	0.00235203	0.00966161	0.59467	0.0186981	0.0464527	0.60078	0.00832453	0.0460849
Up	PDE7B	1.59529	4.44172e-09	7.44543e-08	1.71352	4.68516e-11	9.81313e-10	0.999349	5.40519e-09	3.34494e-07
Up	MAP3K5	1.2888	1.2323e-16	6.12043e-15	0.608288	5.32036e-05	0.000305466	1.03319	8.11151e-21	4.25643e-18
Up	CCDC170	1.11307	0.000864089	0.00414495	1.80108	1.85138e-07	1.96003e-06	0.929886	0.000151935	0.00221998
Up	TIAM2	0.89545	2.13045e-05	0.000165141	1.69601	1.02884e-16	4.94706e-15	1.22333	5.85358e-10	4.58746e-08
Up	FNDC1	2.5852	1.15385e-10	2.55051e-09	4.90771	7.13309e-44	5.06407e-41	1.78467	4.08206e-07	1.52057e-05
Up	ELFN1	1.53266	5.59345e-06	5.00796e-05	1.2275	7.92112e-07	7.32006e-06	0.696431	0.00340735	0.0242231
Up	CARD11	2.33125	1.76516e-07	2.13464e-06	2.53798	1.46673e-12	3.96905e-11	1.40738	0.00310084	0.0225446
Up	SDK1	0.994814	0.00280841	0.0111864	1.151	5.04578e-06	3.79897e-05	1.33325	5.3983e-07	1.91624e-05
Up	SUGCT	1.93907	2.76825e-06	2.63278e-05	2.17458	2.22514e-11	4.93661e-10	1.85045	1.23781e-11	1.509e-09
Up	UPP1	2.99051	8.23922e-23	8.64688e-21	0.970276	6.93728e-05	0.000385301	0.76708	0.000907571	0.00906504
Up	VOPP1	1.30774	2.70407e-07	3.13802e-06	0.914374	2.26215e-06	1.8803e-05	0.653235	0.000203191	0.00280427
Up	NRCAM	3.43667	8.31005e-12	2.16151e-10	1.87604	3.28977e-06	2.6104e-05	2.49714	9.08155e-11	9.05829e-09
Up	RARRES2	1.8269	4.80871e-05	0.000339592	3.94032	2.02508e-45	1.88005e-42	3.454	1.46692e-35	5.90141e-32
Up	TMEM176B	1.43982	0.000459347	0.00244115	2.20821	3.99451e-28	7.90323e-26	1.35369	4.80889e-13	7.84304e-11
Up	TMEM176A	1.83548	1.35623e-08	2.08249e-07	2.0481	9.372e-37	3.90037e-34	1.31597	1.76781e-10	1.59222e-08
Up	TDRP	1.1743	0.000133525	0.000830248	1.31838	6.18372e-06	4.53135e-05	0.879178	0.0016762	0.0143986
Up	CSGALNACT1	1.16892	3.22805e-08	4.64908e-07	0.763658	1.66819e-05	0.000109599	0.671455	0.000977738	0.00956266
Up	ADAM28	2.95021	8.32978e-16	3.8371e-14	1.64981	1.08533e-05	7.47226e-05	1.07962	0.000405379	0.00476853
Up	CYP7B1	2.24253	1.48623e-09	2.73019e-08	1.1782	0.0010445	0.00408493	1.23439	0.000158824	0.00230114
Up	STMN2	1.92327	0.000203605	0.00120634	3.11402	6.65278e-12	1.61707e-10	1.15676	0.00682854	0.0398643
Up	PAG1	1.21554	4.72419e-08	6.49388e-07	0.756261	0.000434737	0.00192615	0.636443	0.00189919	0.0157319
Up	GEM	1.27333	5.07816e-07	5.6435e-06	1.64747	3.20949e-14	1.09422e-12	0.822125	0.000140236	0.00209988
Up	TP53INP1	1.63117	1.78222e-05	0.000141047	1.57467	5.48711e-08	6.60918e-07	1.19404	1.35441e-05	0.000306686
Up	ANGPT1	1.55714	0.00285768	0.011343	2.54949	4.51384e-13	1.29094e-11	1.92261	1.35109e-07	5.84457e-06
Up	CCN4	4.0956	4.42419e-22	4.17153e-20	3.82205	4.03106e-25	5.86155e-23	1.88699	1.4259e-05	0.000318689
Up	ROR2	1.51255	5.06299e-10	1.00668e-08	2.00149	4.3556e-21	3.8939e-19	1.22254	5.37984e-09	3.34494e-07
Up	FAM78A	1.48517	1.09056e-05	9.0835e-05	1.47247	1.13265e-06	1.01485e-05	0.944446	0.0015307	0.0134349
Up	PTGDS	1.69896	0.00010624	0.000680578	2.89904	8.96343e-12	2.12534e-10	3.05478	1.00064e-13	1.88698e-11
Up	SFMBT2	1.25237	2.36606e-05	0.000181654	0.764995	0.0158355	0.0404569	0.98062	0.000387106	0.00458038
Up	KIAA1217	1.30086	5.57954e-13	1.75363e-11	1.13002	1.28919e-11	2.98642e-10	0.91688	1.67022e-06	5.27693e-05
Up	RASSF4	1.35328	1.13875e-08	1.77337e-07	1.46396	2.75414e-07	2.79091e-06	0.82536	0.00314454	0.0227526
Up	WDFY4	1.45493	8.83764e-05	0.000580945	0.949207	0.00288789	0.00987365	0.971919	0.00683361	0.0398643
Up	PRKG1	0.844792	0.00398835	0.0148552	2.12252	1.56984e-15	6.17148e-14	1.22132	1.53438e-07	6.52059e-06
Up	LRRC20	0.846793	0.00149915	0.00663486	2.12931	6.20038e-19	4.02882e-17	1.00739	1.27151e-05	0.000290642
Up	ADAMTS14	3.48428	1.53379e-37	6.61116e-35	3.74679	2.99796e-48	3.61823e-45	1.08136	6.42166e-05	0.00113143
Up	UNC5B	1.21538	1.27843e-06	1.29257e-05	2.06033	8.71084e-18	4.86718e-16	1.22761	5.79816e-24	4.11635e-21
Up	LRMDA	0.727717	0.0025466	0.0102895	1.78783	3.48313e-14	1.17753e-12	1.13206	1.10268e-08	6.33724e-07
Up	HTR7	1.34744	2.64332e-06	2.52591e-05	0.859898	3.00738e-06	2.4101e-05	0.717589	0.000350987	0.00425412
Up	ENTPD1	1.45315	7.85233e-05	0.000522147	0.743953	0.0128834	0.0342714	0.813913	0.000673141	0.00719587
Up	BLNK	1.59652	2.20505e-06	2.14273e-05	1.59845	2.91913e-11	6.32514e-10	0.855862	1.57758e-05	0.000348077
Up	HTRA1	0.86286	0.0117748	0.0356613	2.80291	1.12359e-29	2.37905e-27	0.820707	4.29058e-08	2.15763e-06
Up	TRIM22	0.689115	0.00206357	0.00865967	0.735526	0.000400012	0.00179804	0.722845	0.000987835	0.00962242
Up	AMPD3	1.06919	2.25284e-05	0.000173735	0.660285	0.00208568	0.00750958	0.8398	1.68991e-06	5.3252e-05
Up	MDK	1.6185	2.22948e-06	2.15779e-05	2.86273	4.1388e-25	5.94657e-23	0.863417	0.000862131	0.00871445
Up	TMEM132A	1.50072	0.000955872	0.00452941	1.60236	3.39646e-11	7.25521e-10	1.34789	3.19543e-11	3.53813e-09
Up	NEU3	0.608577	0.000153542	0.000941138	0.656103	9.63559e-06	6.70384e-05	0.65793	0.000139667	0.00209397
Up	SYTL2	0.890066	0.0143168	0.0418073	1.56101	1.57186e-09	2.543e-08	0.833659	0.000132263	0.00200538
Up	NOX4	2.19339	2.15107e-12	6.18124e-11	2.31811	1.49559e-19	1.04944e-17	1.02745	0.000238104	0.00318944
Up	ARHGAP42	1.07415	4.82595e-05	0.00034061	0.976409	1.67298e-06	1.42937e-05	1.11397	1.37427e-07	5.90249e-06
Up	TRPC6	0.967574	0.000390805	0.00211888	1.40422	3.76157e-08	4.67543e-07	1.0427	2.89305e-05	0.0005918
Up	MMP12	7.77403	1.49244e-22	1.51363e-20	2.81115	0.00027963	0.00131113	2.7251	0.00171806	0.0146436
Up	GUCY1A2	1.2453	4.33691e-05	0.000311005	1.83392	1.72491e-15	6.73722e-14	0.638594	0.00087963	0.00883952
Up	LAYN	1.66456	1.55878e-09	2.85911e-08	1.77895	1.42826e-13	4.47733e-12	1.12376	3.12077e-06	8.82075e-05
Up	CD27	1.40827	0.0168725	0.0475559	2.78526	1.03226e-08	1.43529e-07	1.57255	0.00326154	0.0233889
Up	CD163L1	1.77535	1.33988e-11	3.4116e-10	2.84512	1.13091e-27	2.09984e-25	1.66188	1.01665e-10	9.73802e-09
Up	A2ML1	1.8166	8.69285e-05	0.000572362	2.88974	1.29366e-12	3.5324e-11	1.03445	0.00664142	0.0391383
Up	DENND5B	0.792615	0.00235223	0.00966161	1.21883	1.69901e-13	5.24433e-12	0.955042	1.08621e-11	1.36557e-09
Up	PCED1B	1.09732	0.000664614	0.00332693	2.11456	2.38562e-17	1.2573e-15	1.13429	0.00254509	0.0195027
Up	FMNL3	1.075	0.000491492	0.0025813	1.33563	7.40758e-09	1.05801e-07	0.657867	0.00195188	0.0160472
Up	STAT2	0.745468	0.00016674	0.00101227	1.03578	4.28015e-08	5.28192e-07	0.806919	1.02626e-05	0.000239782
Up	PLXNC1	1.93042	6.79707e-13	2.11427e-11	0.627388	0.0168133	0.0425498	0.762659	0.000105499	0.00169102
Up	GLT8D2	1.68025	2.49478e-10	5.24555e-09	3.95373	8.22701e-75	9.92918e-71	1.22534	1.58557e-09	1.13232e-07
Up	CHST11	2.22009	1.33031e-28	2.54849e-26	0.595321	0.0125146	0.0334157	0.661896	1.73079e-06	5.42568e-05
Up	TMEM119	1.60067	0.000253169	0.00145606	4.38321	1.02197e-18	6.49165e-17	1.40083	0.000114959	0.00181128
Up	POSTN	2.60998	1.18503e-07	1.49918e-06	4.27025	1.23048e-17	6.78114e-16	1.16794	0.000833472	0.00849629
Up	PCDH17	2.79544	5.06409e-19	3.25098e-17	1.55203	3.67487e-07	3.63839e-06	1.52794	5.43217e-09	3.34494e-07
Up	DZIP1	0.795935	0.000234199	0.00136548	1.02113	1.75e-06	1.48948e-05	0.670942	0.000406759	0.00478012
Up	COL4A1	2.28976	1.4564e-09	2.67947e-08	1.41661	1.98994e-09	3.13942e-08	0.747692	0.000118501	0.00185718
Up	COL4A2	1.57925	0.000243924	0.00141201	1.57015	1.64253e-08	2.19046e-07	0.794379	0.00227221	0.0181012
Up	ANKRD10	0.90924	1.51981e-05	0.000122284	0.844422	2.24873e-08	2.92455e-07	0.685525	5.86431e-06	0.000149317
Up	FUT8	1.48739	1.9249e-14	7.49406e-13	1.67644	1.60081e-36	6.23233e-34	0.994612	5.9036e-11	6.14229e-09
Up	ARG2	2.38418	1.0207e-06	1.0565e-05	1.94075	8.83455e-07	8.08984e-06	1.07789	0.00817156	0.0455111
Up	GPR176	1.56395	0.000100271	0.00064958	1.16731	4.97146e-06	3.75708e-05	0.71265	0.00325011	0.0233374
Up	BMF	1.02952	0.0102207	0.0318249	2.18611	4.99163e-09	7.32895e-08	1.11554	0.0014522	0.0129157
Up	PLCB2	1.51426	5.43937e-06	4.88087e-05	0.911354	0.0154658	0.0396384	0.953251	0.005556	0.0345824
Up	IGDCC4	0.91998	0.000692762	0.00344639	4.12632	1.49308e-28	3.05424e-26	2.18302	3.55209e-28	6.12431e-25
Up	ITGA11	0.751174	0.00661152	0.0223764	4.23633	2.91096e-48	3.61823e-45	2.42169	2.08881e-20	1.00839e-17
Up	RHCG	5.0982	4.01968e-16	1.92514e-14	3.98084	2.3706e-14	8.19792e-13	3.03996	7.7842e-10	5.83525e-08
Up	PRSS27	3.42075	1.16394e-08	1.81025e-07	3.2355	3.21982e-10	5.97846e-09	1.97051	0.000132955	0.00200927
Up	SEZ6L2	1.47783	0.000310883	0.00174352	2.71688	1.27895e-10	2.50578e-09	1.55782	6.4113e-05	0.00113126
Up	MT1F	2.45443	3.43431e-08	4.90639e-07	2.46949	1.86736e-09	2.96933e-08	1.76231	2.15839e-05	0.000455413
Up	HERPUD1	0.88001	4.52878e-06	4.13448e-05	0.919543	3.94573e-08	4.8792e-07	0.713966	2.16376e-05	0.000455749
Up	NXN	0.717657	0.00879294	0.028179	2.03332	1.00973e-22	1.08808e-20	1.02301	3.78904e-08	1.92953e-06
Up	XAF1	0.896856	2.98658e-05	0.000222775	0.966544	4.56979e-06	3.49068e-05	0.82099	6.59429e-05	0.00115678
Up	DLG4	0.85963	0.00280788	0.0111864	1.10195	5.58624e-06	4.14639e-05	0.785086	0.00154363	0.0135001
Up	ACAP1	1.49474	0.000425815	0.00228103	1.76083	1.70037e-09	2.73259e-08	1.24546	0.001603	0.013858
Up	SPECC1	0.628504	0.0052863	0.0187208	1.4265	3.99707e-19	2.68004e-17	0.773204	6.14633e-08	2.90902e-06
Up	PLXDC1	1.99868	6.45865e-14	2.38377e-12	2.49969	4.26249e-15	1.59764e-13	1.22645	3.99758e-08	2.01869e-06
Up	IKZF3	3.37223	2.29282e-20	1.80863e-18	2.64307	8.96532e-15	3.26895e-13	1.7365	2.61555e-05	0.000538891
Up	CNTNAP1	0.658221	0.00794096	0.0259939	1.11993	5.85464e-08	7.01685e-07	0.716524	7.22464e-05	0.00124563
Up	FZD2	2.26751	1.20194e-07	1.5158e-06	2.74372	1.45962e-12	3.9587e-11	1.41572	8.82147e-07	3.00752e-05
Up	GJC1	1.40722	1.75412e-07	2.12341e-06	1.89385	1.66902e-25	2.5498e-23	1.28051	2.55326e-09	1.7312e-07
Up	COL1A1	1.38622	0.00486258	0.0175498	4.41135	4.8871e-16	2.09158e-14	0.915863	0.00310051	0.0225446
Up	TANC2	1.45912	2.12999e-07	2.52275e-06	1.27987	1.16539e-10	2.29822e-09	0.667511	0.000287437	0.00367877
Up	CD79B	1.42362	0.0154781	0.0444561	2.1187	4.39504e-05	0.000257619	1.64776	0.000805484	0.00827352
Up	AC124319.1	0.679107	0.00111562	0.00515682	0.820311	2.77275e-06	2.24292e-05	0.645184	0.00228502	0.0181315
Up	ALPK2	2.53429	9.19614e-10	1.74236e-08	2.77924	6.91603e-16	2.86837e-14	1.62824	2.71145e-08	1.42281e-06
Up	SERPINB13	2.95838	3.81524e-08	5.38552e-07	2.37642	1.01488e-07	1.14687e-06	1.26721	0.00469042	0.0306656
Up	CCDC102B	2.12943	2.00207e-07	2.38293e-06	1.95837	4.81749e-12	1.19881e-10	0.918165	0.00154283	0.0135001
Up	FUT3	2.79567	2.69794e-07	3.13694e-06	1.9527	0.000119751	0.000622498	1.4599	0.00245774	0.0190875
Up	ZNF699	0.615344	0.000469324	0.00248803	0.880968	6.94849e-08	8.15944e-07	0.845915	5.11119e-07	1.83047e-05
Up	ZNF426	0.811691	0.00149621	0.00662672	0.899278	7.06351e-05	0.000391226	0.611594	0.00563823	0.0349321
Up	PODNL1	1.32331	6.47123e-05	0.000437053	4.20856	1.13743e-30	2.69169e-28	2.04277	7.83884e-22	4.73035e-19
Up	RASAL3	1.37714	0.00365178	0.0138378	1.52233	1.66647e-07	1.79257e-06	1.1195	0.00218399	0.0175959
Up	F2RL3	1.35931	0.00310427	0.0121562	1.40835	9.89458e-09	1.38215e-07	1.06511	1.53957e-06	4.90265e-05
Up	IL12RB1	2.08608	1.32087e-08	2.03337e-07	1.2544	6.56393e-05	0.000367781	1.06953	0.00628824	0.0376557
Up	GRAMD1A	0.650395	0.0100969	0.0315208	0.703582	0.000148186	0.000750574	0.647405	5.86025e-06	0.000149317
Up	MAP4K1	1.44736	0.000480708	0.00253902	2.38158	5.44733e-13	1.55056e-11	1.17132	0.00633668	0.0378601
Up	PLEKHG2	0.851139	0.00580622	0.0201772	1.19013	2.03545e-08	2.65577e-07	0.746009	0.000231392	0.00311189
Up	POU2F2	2.28493	5.24845e-12	1.41077e-10	1.33872	3.63282e-05	0.00021673	1.73399	2.99762e-11	3.34984e-09
Up	CNFN	1.72486	0.000367464	0.00200857	2.41658	6.93564e-11	1.4231e-09	1.66681	8.07908e-06	0.000199061
Up	KLK10	1.72738	1.85808e-07	2.23581e-06	2.49806	2.90333e-13	8.54642e-12	1.44672	3.28334e-05	0.000656433
Up	KLK13	3.39669	5.77889e-10	1.13963e-08	3.54388	2.24732e-11	4.97669e-10	1.579	0.00143113	0.0127659
Up	ZNF671	1.07474	0.000842771	0.0040572	1.18181	2.61949e-05	0.000161946	1.35422	0.000425414	0.00494547
Up	CPXM1	2.72537	1.20899e-07	1.52151e-06	2.93269	4.90249e-19	3.23323e-17	0.821145	0.00181578	0.0152609
Up	SYNDIG1	2.26859	6.46765e-08	8.69243e-07	1.96269	3.28613e-05	0.000198203	1.87658	3.50048e-05	0.000690506
Up	PI3	9.21102	6.82737e-92	4.11997e-88	2.52584	4.35114e-10	7.88497e-09	1.87405	2.99759e-06	8.53254e-05
Up	SLC2A10	0.659461	0.00754077	0.0249219	2.01198	1.32963e-16	6.19588e-15	0.624687	4.06689e-06	0.000109806
Up	RIPOR3	2.07752	1.29968e-17	7.1299e-16	1.88223	1.58634e-20	1.32038e-18	1.92799	6.9063e-18	2.68878e-15
Up	PMEPA1	0.74054	0.0111114	0.0340625	1.53604	4.33372e-12	1.08966e-10	1.04057	2.14038e-10	1.9135e-08
Up	SLC17A9	1.32308	3.60426e-06	3.34871e-05	1.79253	3.60441e-15	1.35943e-13	1.00456	3.32885e-06	9.32155e-05
Up	TRPM2	0.986641	0.00704262	0.0235711	2.06593	9.69859e-14	3.12974e-12	1.36052	4.57678e-05	0.000855065
Up	PCBP3	2.0418	3.07271e-09	5.29779e-08	0.656536	0.00284586	0.00974927	0.705214	0.00713191	0.0411645
Up	XBP1	1.02526	0.00402938	0.0149793	0.788474	0.0108686	0.0297851	1.05369	0.000403072	0.00474602
Up	C1QTNF6	2.78977	5.58372e-20	4.13435e-18	3.59654	8.8749e-43	5.63743e-40	0.617051	0.00232643	0.0183995
Up	NLGN4X	2.52253	4.62649e-11	1.08135e-09	1.95681	1.24149e-07	1.35967e-06	2.36441	5.8648e-11	6.14229e-09
Up	GPM6B	0.837665	0.0154383	0.0443736	1.93431	1.24288e-25	1.97373e-23	0.875213	7.24981e-09	4.35313e-07
Up	PIM2	3.27341	1.17424e-12	3.50791e-11	1.96284	2.68862e-06	2.19102e-05	2.53225	5.44374e-10	4.31609e-08
Up	HEPH	0.962911	1.56604e-05	0.000125585	2.63583	1.22909e-41	7.06373e-39	0.875292	9.69658e-10	7.13585e-08
Up	GRIA3	1.52252	4.0676e-05	0.000294139	2.88533	1.54202e-21	1.42066e-19	1.15035	0.000107509	0.0017163
Up	PRSS22	3.27587	5.15476e-05	0.000360236	2.02103	0.00296739	0.010094	2.14297	0.00132191	0.0119956
