# Supplementary material for: Integrative small and long RNA omics analysis of human healing and nonhealing wounds discovers cooperating microRNAs as therapeutic targets
Source: eLife. 2022 Aug 12;11:e80322. doi: 10.7554/eLife.80322 (PMC9374442; doi:10.7554/eLife.80322)
Supplement: Figure 2—source data 1. [file elife-80322-fig2-data1.xlsx]

## Sheet: miRNA kMEs
Weighted gene co-expression network analysis of miRNAs in wound healing.
kME: module eigengene values
ID	moduleColor	moduleLabel	kME_m8	kME_m12	kME_m5	kME_m6	kME_m13	ME1kME_m1	kME_m4	kME_m2	kME_m10	kME_m7	kME_m11	kME_m3	kME_m9
hsa-let-7a-2-3p	black	m3	-0.52984	-0.427605	-0.0598603	-0.262233	-0.327846	-0.316416	0.15271	-0.0589008	-0.0784578	0.401383	0.114212	0.524343	0.340402
hsa-let-7a-3p	blue	m10	-0.391578	0.192434	0.333328	-0.189313	-0.0545499	-0.606856	-0.789708	0.620794	0.915738	0.0238235	0.554351	-0.378183	0.294222
hsa-let-7a-5p	brown	m11	-0.730425	-0.656907	-0.332926	-0.497735	0.122962	-0.393831	-0.108309	0.394995	0.495694	0.702498	0.932417	0.45187	0.722042
hsa-let-7b-3p	red	m2	-0.384918	-0.131803	0.0471621	-0.0682639	0.176152	-0.296276	-0.416732	0.545414	0.528763	0.296523	0.643135	-0.104634	0.286324
hsa-let-7b-5p	black	m3	-0.305285	-0.776846	-0.517214	-0.0779967	0.189535	0.34025	0.852174	-0.278747	-0.535909	0.53425	0.156118	0.938666	0.44419
hsa-let-7c-3p	magenta	m5	0.193504	0.434252	0.456165	0.0542753	-0.617715	-0.205582	-0.318316	-0.464722	-0.063058	-0.222478	-0.17426	-0.214397	0.11209
hsa-let-7c-5p	black	m3	-0.579948	-0.840505	-0.509568	-0.370812	-0.027181	-0.0852846	0.520584	-0.154962	-0.220644	0.761221	0.501602	0.946603	0.698344
hsa-let-7d-3p	red	m2	-0.244527	-0.270522	-0.243056	-0.427745	0.454658	-0.145808	-0.142658	0.586927	0.594134	0.291492	0.533876	-0.0479833	0.0861606
hsa-let-7d-5p	brown	m11	-0.466728	-0.605034	-0.43943	-0.19467	0.570413	0.00210541	0.0350218	0.551856	0.405055	0.591379	0.796639	0.284034	0.372057
hsa-let-7e-3p	grey	m0	0.436249	0.347344	0.345601	0.275907	0.0384444	0.22239	-0.0962317	-0.267028	-0.101364	-0.387522	-0.283518	-0.352224	-0.290194
hsa-let-7e-5p	blue	m10	0.196177	0.291071	0.248185	-0.384538	-0.230744	-0.417096	-0.470084	0.0101163	0.41984	-0.090548	0.337816	-0.348742	-0.0770587
hsa-let-7f-1-3p	blue	m10	-0.112621	0.303349	0.202182	-0.253225	-0.0241454	-0.551151	-0.635962	0.561275	0.769334	-0.189397	0.405529	-0.454626	-0.101544
hsa-let-7f-2-3p	blue	m10	-0.358159	0.10266	0.156273	-0.253075	-0.129387	-0.588953	-0.671368	0.497587	0.832086	-0.0144219	0.602159	-0.277332	0.299382
hsa-let-7f-5p	blue	m10	-0.402043	0.0707812	0.109178	-0.367291	-0.00883679	-0.613143	-0.712734	0.618116	0.944946	0.0370159	0.691604	-0.325253	0.303538
hsa-let-7g-3p	purple	m6	0.421198	0.0389461	-0.0116423	0.779461	0.358088	0.712849	0.487618	-0.252665	-0.614528	-0.157569	-0.420236	0.136858	-0.264013
hsa-let-7g-5p	blue	m10	-0.63769	-0.275158	-0.0108226	-0.187222	0.242532	-0.423762	-0.491545	0.753453	0.830037	0.319597	0.773317	-0.0141559	0.543792
hsa-let-7i-3p	tan	m8	0.698353	0.52332	-0.0524455	0.228556	-0.0692264	0.107299	-0.105079	-0.30737	-0.210753	-0.281643	-0.267277	-0.395698	-0.695418
hsa-let-7i-5p	tan	m8	0.696059	0.579019	0.180557	0.498663	0.0233662	0.341593	-0.0393287	-0.282665	-0.282459	-0.675182	-0.525621	-0.510712	-0.664541
hsa-miR-1-3p	brown	m11	-0.629146	-0.51055	-0.413001	-0.48858	0.20103	-0.401859	-0.248638	0.578529	0.543268	0.652713	0.817392	0.192689	0.397198
hsa-miR-100-5p	black	m3	-0.648894	-0.882158	-0.451231	-0.258607	0.0458312	-0.00263793	0.560995	-0.0803691	-0.252414	0.776077	0.372953	0.95234	0.662506
hsa-miR-101-3p	red	m2	-0.666637	-0.529023	-0.183037	0.251476	0.282228	0.0294166	0.0562566	0.446522	0.0863123	0.49501	0.266192	0.387921	0.46219
hsa-miR-101-5p	greenyellow	m7	-0.545868	-0.646573	-0.46918	-0.155035	0.0331896	-0.0912172	0.15232	0.0730899	-0.0541735	0.81503	0.438588	0.5702	0.476443
hsa-miR-10395-3p	tan	m8	0.732208	0.436142	-0.118476	-0.140136	-0.331842	0.0328696	0.243318	-0.61027	-0.390394	-0.367244	-0.393938	-0.0383376	-0.437507
hsa-miR-10399-3p	red	m2	-0.0687488	0.348453	0.212113	0.247167	0.224183	-0.0201465	-0.37355	0.571145	0.366718	-0.380563	-0.210929	-0.492971	-0.13235
hsa-miR-10399-5p	purple	m6	-0.106299	0.13078	0.391076	0.684169	0.39034	0.260895	-0.0913745	0.45738	0.170643	-0.265839	-0.186614	-0.165342	0.0243114
hsa-miR-103a-2-5p	purple	m6	0.34148	0.145561	-0.00737943	0.728494	0.290946	0.582093	0.188091	-0.0679097	-0.390388	-0.200854	-0.355209	-0.14179	-0.311006
hsa-miR-103a-3p	red	m2	-0.319745	-0.24844	-0.0842899	0.0820537	0.771344	0.195718	-0.112836	0.855398	0.443838	0.0862217	0.198128	-0.201299	0.0683745
hsa-miR-10527-5p	turquoise	m1	0.0285761	-0.366521	-0.170039	0.33572	0.663799	0.633944	0.598591	0.273316	-0.246139	-0.0102042	-0.141694	0.26348	-0.0655169
hsa-miR-106a-3p	red	m2	-0.42853	-0.0606516	0.138591	0.0293093	0.405368	-0.190878	-0.417026	0.868547	0.643476	0.0824704	0.349199	-0.250485	0.203273
hsa-miR-106a-5p	red	m2	-0.479645	-0.199721	-0.0270019	0.0941728	0.636788	-0.0338989	-0.275427	0.964707	0.60091	0.126429	0.33018	-0.167107	0.169414
hsa-miR-106b-3p	red	m2	-0.291114	-0.237271	0.0362393	0.405643	0.823265	0.424551	0.0530638	0.798785	0.249407	-0.0471131	0.0103346	-0.137213	0.0655369
hsa-miR-106b-5p	purple	m6	0.038091	0.256589	0.335765	0.822937	0.26049	0.372683	-0.106359	0.219566	-0.0745658	-0.361622	-0.341734	-0.286028	-0.104235
hsa-miR-107	red	m2	-0.610483	-0.369234	-0.206142	-0.242473	0.499844	-0.245788	-0.293581	0.918388	0.706118	0.413165	0.61008	-0.0227489	0.26871
hsa-miR-10a-3p	brown	m11	-0.518769	-0.317499	-0.308519	-0.630602	-0.147541	-0.646202	-0.410597	0.266722	0.565139	0.604429	0.848616	0.178419	0.535157
hsa-miR-10a-5p	greenyellow	m7	-0.35979	-0.545834	-0.581139	-0.384706	0.035558	-0.0449169	0.152833	-0.0847932	-0.0302191	0.682311	0.455996	0.411544	0.395874
hsa-miR-10b-3p	greenyellow	m7	-0.538456	-0.574635	-0.481825	-0.62933	-0.00644566	-0.440851	-0.102713	0.225111	0.294252	0.895519	0.771352	0.419583	0.454992
hsa-miR-10b-5p	greenyellow	m7	-0.348793	-0.67195	-0.696118	-0.37775	0.0920333	0.00567659	0.323876	-0.124139	-0.127037	0.84899	0.541281	0.623711	0.409385
hsa-miR-1180-3p	turquoise	m1	0.246051	-0.224058	-0.102969	0.569684	0.521473	0.910851	0.806593	-0.186372	-0.705871	-0.157418	-0.566121	0.256899	-0.227031
hsa-miR-1185-1-3p	magenta	m5	0.0662035	0.420005	0.95579	0.555284	-0.190909	0.0308697	-0.270557	0.00491298	0.0602063	-0.568652	-0.370627	-0.321393	0.0464683
hsa-miR-1185-2-3p	magenta	m5	0.0687243	0.482774	0.92888	0.248546	-0.264178	-0.181185	-0.448964	0.0802162	0.259581	-0.576164	-0.286121	-0.475991	-0.0375384
hsa-miR-1185-5p	yellow	m12	0.264104	0.421475	0.26378	0.21584	-0.379239	-0.145642	-0.239313	-0.334109	-0.1533	-0.285789	-0.187284	-0.258681	-0.26614
hsa-miR-1197	magenta	m5	0.373415	0.660404	0.884216	0.510361	-0.309409	0.0123049	-0.326097	-0.134838	-0.0249117	-0.70521	-0.546117	-0.497046	-0.239638
hsa-miR-12136	tan	m8	0.931739	0.662372	0.17991	0.25983	-0.0561754	0.264472	0.00696716	-0.37543	-0.301359	-0.583519	-0.451509	-0.457237	-0.645559
hsa-miR-1246	turquoise	m1	0.589241	0.0968456	-0.00414251	0.667439	0.378223	0.810856	0.510305	-0.309233	-0.609338	-0.343466	-0.590761	-0.0265673	-0.360277
hsa-miR-1247-3p	pink	m4	-0.269057	-0.556728	-0.34739	0.251973	0.403907	0.434409	0.767753	0.014867	-0.410894	0.243821	0.0128416	0.727998	0.314584
hsa-miR-1247-5p	black	m3	-0.410359	-0.715565	-0.463592	-0.125794	0.277538	0.187207	0.650722	-0.00319044	-0.248007	0.544034	0.37254	0.814103	0.483954
hsa-miR-1248	tan	m8	0.7653	0.756624	0.136079	-0.15914	-0.43516	-0.253739	-0.297238	-0.396277	0.00544991	-0.472108	-0.242653	-0.454995	-0.463613
hsa-miR-1250-5p	turquoise	m1	0.359087	0.040366	-0.0623775	0.307461	0.708564	0.675835	0.263198	0.271346	-0.141221	-0.328297	-0.423453	-0.334636	-0.437006
hsa-miR-1255a	magenta	m5	-0.378703	-0.0357045	0.461034	-0.0517117	0.0985754	-0.241065	-0.263625	0.428864	0.460376	-0.107993	0.107559	-0.0473262	0.383173
hsa-miR-1255b-5p	red	m2	-0.257348	-0.307047	-0.190972	0.188493	0.835598	0.366053	0.101357	0.770447	0.234647	0.0448582	0.083736	-0.101056	-0.0176426
hsa-miR-125a-3p	turquoise	m1	0.450823	-0.10785	-0.0168809	0.735121	0.571617	0.944284	0.615478	-0.199326	-0.668499	-0.200977	-0.524205	0.0619961	-0.354327
hsa-miR-125a-5p	greenyellow	m7	-0.341266	-0.695649	-0.599478	-0.552972	0.180244	-0.098548	0.298977	0.0296517	-0.0191984	0.822072	0.543579	0.595536	0.356174
hsa-miR-125b-1-3p	greenyellow	m7	-0.38917	-0.453718	-0.152759	-0.180513	0.0993189	-0.16512	0.0698193	0.211481	0.199115	0.506472	0.58409	0.417839	0.396804
hsa-miR-125b-2-3p	salmon	m9	-0.583688	-0.679952	-0.0819487	-0.109977	-0.149543	-0.0739122	0.311861	-0.16238	-0.203044	0.611365	0.367363	0.783742	0.853128
hsa-miR-125b-5p	greenyellow	m7	-0.498414	-0.779052	-0.521948	-0.457769	-0.0134571	-0.121776	0.382923	-0.128552	-0.212655	0.856935	0.432516	0.771908	0.506598
hsa-miR-126-3p	greenyellow	m7	-0.539486	-0.575245	-0.529441	-0.656092	-0.194445	-0.477456	0.0427032	0.0118407	0.180339	0.809601	0.74816	0.58564	0.496757
hsa-miR-126-5p	blue	m10	-0.439959	-0.0800124	-0.167995	-0.545176	0.00230298	-0.651619	-0.638687	0.586185	0.837249	0.445498	0.764932	-0.194232	0.184742
hsa-miR-1260b	greenyellow	m7	-0.604943	-0.671169	-0.44219	-0.272811	0.016399	-0.0793324	0.285734	0.0654876	-0.0571459	0.688809	0.357236	0.63264	0.559267
hsa-miR-1262	turquoise	m1	0.281853	-0.212195	0.0403304	0.629911	0.529659	0.816357	0.504985	-0.204284	-0.536403	-0.101997	-0.284271	0.156813	0.0221957
hsa-miR-1268b	purple	m6	0.404322	0.202188	0.395543	0.904905	0.444667	0.779126	0.292776	-0.0444398	-0.377489	-0.458508	-0.583844	-0.189874	-0.290855
hsa-miR-127-3p	turquoise	m1	0.486158	-0.0415173	0.130184	0.619695	0.475684	0.914946	0.555355	-0.289034	-0.64166	-0.323359	-0.582978	-0.0514456	-0.328053
hsa-miR-127-5p	turquoise	m1	0.650765	0.248376	0.255314	0.768925	0.33559	0.833107	0.37405	-0.355534	-0.597852	-0.507778	-0.662087	-0.2462	-0.500037
hsa-miR-1271-5p	turquoise	m1	-0.0953211	-0.29301	0.222094	0.695489	0.475371	0.561618	0.317721	0.15778	-0.20079	0.0580701	0.00401915	0.227215	0.185778
hsa-miR-1273h-3p	purple	m6	-0.0833653	-0.0135398	0.0641848	0.679851	0.615067	0.41898	0.120458	0.506191	0.100162	-0.169492	-0.135998	-0.0602903	-0.105734
hsa-miR-1277-5p	greenyellow	m7	-0.368821	-0.242933	-0.197098	-0.403335	-0.338725	-0.30983	-0.151706	-0.140342	0.059367	0.471363	0.235518	0.182037	0.350793
hsa-miR-1278	red	m2	-0.558092	-0.209338	-0.00429414	0.0284763	0.355008	-0.139235	-0.357552	0.736327	0.685633	0.144771	0.440855	-0.112924	0.403579
hsa-miR-128-1-5p	turquoise	m1	0.237922	0.0481988	0.119439	0.724002	0.52359	0.829263	0.372379	0.0238228	-0.424661	-0.342043	-0.582809	-0.168038	-0.269889
hsa-miR-128-3p	red	m2	-0.415179	-0.297493	-0.0996684	-0.306004	0.334785	-0.130862	-0.0191974	0.544618	0.377995	0.31352	0.287356	0.142706	0.296197
hsa-miR-1285-3p	turquoise	m1	-0.032031	-0.323247	-0.154311	0.497971	0.534159	0.666795	0.762587	0.088894	-0.501775	-0.0221117	-0.361781	0.457243	0.0149723
hsa-miR-1287-5p	black	m3	-0.251539	-0.755314	-0.561134	-0.0676529	0.148894	0.354193	0.834394	-0.331023	-0.651931	0.616116	-0.0136632	0.878258	0.239773
hsa-miR-129-5p	grey	m0	0.189969	0.255938	0.159968	0.123616	-0.172655	-0.0185516	-0.0542944	-0.20685	-0.102998	-0.294956	-0.158303	-0.167218	-0.256312
hsa-miR-1291	pink	m4	-0.248246	-0.576866	-0.433064	-0.137609	-0.0163018	0.178917	0.806712	-0.322648	-0.550461	0.388592	-0.0787187	0.885797	0.304164
hsa-miR-1292-5p	turquoise	m1	0.272256	-0.301764	-0.23126	0.436112	0.609214	0.917597	0.780357	-0.128596	-0.627994	-0.127355	-0.479425	0.199653	-0.275906
hsa-miR-1293	purple	m6	0.124446	0.103326	0.265104	0.789871	0.156448	0.520365	0.284513	-0.073128	-0.367381	-0.369749	-0.424445	0.0106717	-0.0930622
hsa-miR-1294	grey	m0	-0.135872	-0.174558	0.131505	0.0280724	0.273008	0.0999408	0.0641691	0.339357	0.156135	-0.0173776	-0.0621077	0.0330146	0.0867502
hsa-miR-1296-5p	tan	m8	0.728169	0.511644	0.499196	0.382802	-0.102953	0.338685	0.0371805	-0.426277	-0.355213	-0.570631	-0.602823	-0.404491	-0.531378
hsa-miR-1298-5p	black	m3	-0.490425	-0.661645	-0.300036	-0.262756	-0.217881	-0.0606002	0.495407	-0.285613	-0.381159	0.543749	0.149565	0.832678	0.643158
hsa-miR-1299	black	m3	-0.221749	-0.374913	-0.163241	-0.143878	-0.200688	-0.0396262	0.246027	-0.274156	-0.365495	0.251315	0.0127939	0.426825	0.346316
hsa-miR-1301-3p	turquoise	m1	0.456132	-0.00482318	0.0101142	0.568504	0.679622	0.911795	0.458147	0.00190837	-0.437862	-0.347161	-0.527679	-0.208928	-0.445439
hsa-miR-1303	turquoise	m1	-0.244876	-0.337679	0.141927	0.323074	0.221381	0.403371	0.361275	0.0785183	-0.230504	-0.0625348	-0.11783	0.232282	0.208646
hsa-miR-1304-5p	turquoise	m1	-0.195416	-0.260396	0.0611419	0.715612	0.344227	0.536559	0.514763	0.0736518	-0.375465	-0.0130411	-0.280065	0.390658	0.103618
hsa-miR-1306-5p	red	m2	-0.272274	-0.200608	0.220935	0.132857	0.347858	-0.0116055	-0.159069	0.468809	0.304955	0.195633	0.304651	0.0173604	0.358271
hsa-miR-1307-3p	turquoise	m1	0.325381	-0.202369	-0.13937	0.515199	0.721155	0.954266	0.680641	-0.0357481	-0.532564	-0.167654	-0.487462	0.0615633	-0.322324
hsa-miR-1307-5p	purple	m6	0.378681	0.0140729	0.0434091	0.86872	0.554124	0.895195	0.494725	-0.0942486	-0.524797	-0.295918	-0.536607	-0.0184222	-0.311412
hsa-miR-130a-3p	black	m3	-0.364453	-0.81362	-0.563377	-0.0796962	0.15533	0.253944	0.60654	-0.225095	-0.418862	0.768916	0.312096	0.820424	0.432721
hsa-miR-130a-5p	purple	m6	0.32129	0.200773	0.163728	0.884372	0.283931	0.689485	0.279681	-0.145873	-0.455931	-0.411474	-0.57451	-0.130038	-0.286827
hsa-miR-130b-3p	turquoise	m1	0.379945	-0.0400567	-0.0269304	0.783462	0.687412	0.934886	0.465393	0.0179322	-0.487671	-0.261108	-0.476292	-0.113821	-0.381129
hsa-miR-130b-5p	turquoise	m1	0.121339	0.198393	0.209258	0.458556	0.548152	0.496224	-8.7928e-05	0.449657	0.0804865	-0.406079	-0.419389	-0.436043	-0.259157
hsa-miR-132-3p	turquoise	m1	0.332671	0.193097	0.250181	0.651819	0.732429	0.648361	0.0650784	0.361892	0.013523	-0.432778	-0.327776	-0.440273	-0.415864
hsa-miR-132-5p	grey	m0	-0.346146	-0.40667	-0.156785	-0.195137	0.294044	0.0326839	0.280671	0.279324	0.0660313	0.28128	0.179908	0.360931	0.231236
hsa-miR-133a-3p	greenyellow	m7	-0.48518	-0.547257	-0.455202	-0.345442	0.224922	-0.229833	-0.0736156	0.363467	0.220574	0.835923	0.683223	0.309153	0.27719
hsa-miR-133a-5p	greenyellow	m7	-0.461898	-0.725648	-0.547007	-0.301503	0.11902	-0.029026	0.269686	-0.000102444	-0.185341	0.914216	0.462811	0.58536	0.315766
hsa-miR-133b	greenyellow	m7	-0.446359	-0.544133	-0.311017	-0.100776	0.231868	-0.0849108	0.0832108	0.250002	0.0443833	0.70182	0.55592	0.428136	0.370701
hsa-miR-134-5p	turquoise	m1	0.456562	-0.143717	-0.101941	0.603359	0.573163	0.975529	0.686215	-0.264256	-0.680617	-0.215258	-0.545398	0.0704165	-0.351009
hsa-miR-1343-3p	turquoise	m1	-0.227606	-0.431827	-0.413665	0.245622	0.346353	0.289751	0.430714	0.0600768	-0.16938	0.298955	0.116318	0.471928	0.144287
hsa-miR-135b-3p	yellow	m12	0.513427	0.860687	0.689907	0.542028	-0.2726	-0.00620822	-0.38354	-0.124206	-0.0147272	-0.747232	-0.570836	-0.622288	-0.444479
hsa-miR-135b-5p	yellow	m12	0.492491	0.894349	0.589857	0.153942	-0.507855	-0.276391	-0.513838	-0.229069	0.121255	-0.658801	-0.40805	-0.633161	-0.39983
hsa-miR-136-3p	magenta	m5	0.244632	0.542047	0.81478	0.486324	-0.337582	-0.127472	-0.460922	-0.167238	0.114505	-0.512683	-0.153634	-0.407719	0.00875283
hsa-miR-136-5p	pink	m4	0.338904	-0.329844	-0.343837	0.304556	0.361411	0.816373	0.917144	-0.475429	-0.828505	-0.0303606	-0.461737	0.42949	-0.214648
hsa-miR-138-5p	pink	m4	0.371625	-0.0709703	-0.21933	0.221714	-0.0373315	0.396539	0.635217	-0.519414	-0.637153	0.00532532	-0.29892	0.457289	-0.000630591
hsa-miR-139-3p	black	m3	-0.206884	-0.762601	-0.648875	-0.0851583	0.279592	0.452584	0.864544	-0.274407	-0.639032	0.617548	0.01007	0.814576	0.181546
hsa-miR-139-5p	greenyellow	m7	-0.595376	-0.83491	-0.62619	-0.501514	-0.0155693	-0.164638	0.378767	-0.0758754	-0.123807	0.936684	0.589114	0.82183	0.547137
hsa-miR-140-3p	pink	m4	-0.137582	-0.62536	-0.571732	0.29793	0.744957	0.726803	0.727062	0.182332	-0.441555	0.385022	-0.124693	0.440871	-0.0812734
hsa-miR-140-5p	greenyellow	m7	-0.51663	-0.584658	-0.539965	-0.553494	-0.0592654	-0.387231	-0.0264954	0.131933	0.185115	0.9096	0.643253	0.454798	0.314593
hsa-miR-141-3p	black	m3	-0.593969	-0.753737	-0.33791	-0.248356	-0.127208	-0.113475	0.444671	-0.18463	-0.184161	0.652085	0.480949	0.920255	0.801846
hsa-miR-141-5p	black	m3	-0.531184	-0.378693	0.0789778	0.0957993	-0.241682	-0.110392	0.285978	-0.135804	-0.178971	0.213029	0.161135	0.673588	0.758018
hsa-miR-142-3p	green	m13	0.213805	0.0361242	-0.157064	0.499617	0.824687	0.595771	0.179965	0.525511	0.044675	-0.222848	-0.250909	-0.282711	-0.456213
hsa-miR-142-5p	red	m2	-0.183259	0.212408	0.0817412	0.0926651	0.42114	-0.195246	-0.471372	0.866699	0.733988	-0.164685	0.209888	-0.442551	-0.132719
hsa-miR-143-3p	greenyellow	m7	-0.459597	-0.714815	-0.592613	-0.299529	0.0678617	-0.0585417	0.31951	-0.0164901	-0.20921	0.914551	0.401408	0.641448	0.258314
hsa-miR-143-5p	turquoise	m1	0.258922	-0.431773	-0.530794	0.165908	0.50074	0.676638	0.611543	-0.235207	-0.615816	0.414936	-0.0909812	0.287534	-0.267954
hsa-miR-144-3p	red	m2	-0.534666	-0.487274	-0.372539	-0.174778	0.440612	-0.0832656	-0.0501505	0.657944	0.294924	0.605173	0.395093	0.157991	0.136152
hsa-miR-144-5p	red	m2	-0.525523	-0.112017	0.00982342	-0.154525	0.423086	-0.284119	-0.41964	0.95931	0.764181	0.0668669	0.367699	-0.247394	0.144025
hsa-miR-145-3p	greenyellow	m7	-0.519556	-0.625705	-0.578838	-0.563119	0.116934	-0.335735	-0.00401475	0.265044	0.250859	0.891971	0.745413	0.445277	0.336866
hsa-miR-145-5p	greenyellow	m7	-0.275941	-0.692751	-0.604983	-0.218576	0.318697	0.18838	0.345746	0.0210159	-0.210306	0.852207	0.427184	0.481809	0.148106
hsa-miR-146a-5p	tan	m8	0.872766	0.342587	-0.0580533	0.468019	0.262384	0.689964	0.376415	-0.432571	-0.563391	-0.465289	-0.601272	-0.261378	-0.679625
hsa-miR-146b-3p	turquoise	m1	0.365172	-0.0523785	-0.0599031	0.525487	0.675282	0.890959	0.448455	0.0449615	-0.403478	-0.306152	-0.527705	-0.202509	-0.4179
hsa-miR-146b-5p	turquoise	m1	0.464832	0.0210544	-0.0457156	0.610353	0.639837	0.920149	0.447443	-0.0462525	-0.466392	-0.343777	-0.570813	-0.227417	-0.492694
hsa-miR-147b-3p	tan	m8	0.81636	0.256039	-0.0732284	0.355	0.283215	0.670365	0.489264	-0.362626	-0.589752	-0.396192	-0.594012	-0.13438	-0.615489
hsa-miR-147b-5p	yellow	m12	0.620027	0.756188	0.298462	0.0509422	-0.326276	-0.24066	-0.459987	-0.110996	0.0969423	-0.522237	-0.304506	-0.601694	-0.529236
hsa-miR-148a-3p	black	m3	-0.448546	-0.569301	-0.326306	-0.551871	-0.351339	-0.330851	0.284652	-0.297844	-0.069319	0.561006	0.473122	0.762053	0.694601
hsa-miR-148a-5p	pink	m4	0.0341364	-0.511084	-0.38272	0.085182	0.135516	0.549483	0.960957	-0.492153	-0.782774	0.199668	-0.314684	0.759206	0.136269
hsa-miR-148b-3p	blue	m10	-0.554528	-0.140143	0.0802012	-0.443577	0.0604461	-0.554474	-0.557126	0.690782	0.850321	0.248035	0.573791	-0.144054	0.412943
hsa-miR-148b-5p	red	m2	-0.108296	0.311143	0.0546764	-0.102914	0.124112	-0.410241	-0.583558	0.58673	0.685384	-0.132246	0.33883	-0.390145	0.0691445
hsa-miR-149-5p	black	m3	-0.459482	-0.673863	-0.288268	-0.0541449	-0.0105985	0.102324	0.676785	-0.218028	-0.37445	0.444252	0.19019	0.948389	0.646896
hsa-miR-150-3p	purple	m6	0.235324	0.136713	0.203124	0.855205	0.319726	0.51412	0.185824	0.0077397	-0.283358	-0.214038	-0.349234	-0.0237166	-0.178491
hsa-miR-150-5p	purple	m6	0.188635	0.196	0.259105	0.868594	0.296632	0.446228	0.0607454	0.100849	-0.174517	-0.251808	-0.312522	-0.114148	-0.159638
hsa-miR-151a-3p	pink	m4	-0.155558	-0.561764	-0.310906	0.0932968	0.0811612	0.427466	0.902591	-0.407858	-0.701181	0.240104	-0.237922	0.835066	0.271334
hsa-miR-151a-5p	tan	m8	0.430177	0.294037	-0.135487	0.0584721	0.00992591	0.139768	-0.171945	-0.208311	-0.129818	0.0483298	-0.111193	-0.362693	-0.426089
hsa-miR-151b	pink	m4	0.0510351	-0.523303	-0.55349	0.098755	0.609611	0.659517	0.765861	-0.0104142	-0.499458	0.335964	-0.0767033	0.434904	-0.113122
hsa-miR-152-3p	pink	m4	0.0284988	-0.581931	-0.408582	0.0525215	0.0919122	0.506006	0.861257	-0.582104	-0.806909	0.363562	-0.194283	0.75357	0.186332
hsa-miR-152-5p	turquoise	m1	0.462151	0.0142737	0.0963104	0.754096	0.275257	0.84312	0.592213	-0.452356	-0.739944	-0.279365	-0.616816	0.109558	-0.274853
hsa-miR-154-3p	magenta	m5	-0.0758699	0.40725	0.892772	0.491763	-0.150255	-0.0338966	-0.362429	0.144414	0.17623	-0.500292	-0.28819	-0.366982	0.124989
hsa-miR-154-5p	purple	m6	0.249475	0.0537935	0.200247	0.177961	-0.211641	0.0036039	-0.0454004	-0.44531	-0.188837	-0.0224759	0.164613	0.0574355	0.0929852
hsa-miR-155-5p	yellow	m12	0.655548	0.870635	0.380958	0.403188	-0.0439542	0.124434	-0.340409	-0.019361	0.0479291	-0.754313	-0.581229	-0.760797	-0.633254
hsa-miR-15a-5p	red	m2	-0.167325	0.17739	0.0329559	0.149831	0.485039	-0.0940605	-0.483025	0.872751	0.643566	-0.129197	0.186591	-0.506995	-0.180699
hsa-miR-15b-3p	red	m2	-0.411988	-0.011118	0.0639724	-0.10482	0.257798	-0.2716	-0.438332	0.808968	0.654362	-0.0168614	0.336699	-0.306245	0.0979022
hsa-miR-15b-5p	red	m2	-0.482598	-0.107942	-0.0368388	-0.197123	0.464845	-0.284903	-0.433118	0.97042	0.798461	0.125431	0.426697	-0.261394	0.130794
hsa-miR-16-1-3p	turquoise	m1	0.501873	0.0437738	0.0136806	0.685997	0.581938	0.942764	0.464134	-0.139233	-0.544162	-0.340963	-0.593811	-0.190831	-0.454421
hsa-miR-16-2-3p	red	m2	-0.490011	-0.156503	-0.119732	-0.262321	0.423665	-0.320721	-0.409356	0.936473	0.803777	0.16367	0.488479	-0.211954	0.119324
hsa-miR-16-5p	red	m2	-0.222046	0.284096	0.119454	-0.124359	0.231576	-0.416181	-0.679801	0.854642	0.843293	-0.161305	0.297149	-0.555882	-0.0927501
hsa-miR-17-3p	turquoise	m1	0.12881	-0.442305	-0.316547	0.513716	0.738387	0.928611	0.787986	-0.0169588	-0.591418	0.0943637	-0.31971	0.323618	-0.143802
hsa-miR-17-5p	red	m2	-0.384688	0.0601423	0.366334	0.469184	0.44666	0.0281372	-0.387441	0.792104	0.493316	-0.142665	0.0791409	-0.312971	0.152255
hsa-miR-181a-2-3p	pink	m4	-0.0247225	-0.539982	-0.261527	0.123741	0.268282	0.559893	0.753342	-0.347322	-0.602639	0.207426	-0.152334	0.627852	0.375373
hsa-miR-181a-3p	yellow	m12	0.727511	0.707564	0.294512	0.488182	0.115796	0.418328	-0.0741225	-0.121108	-0.224218	-0.765239	-0.774706	-0.673636	-0.689846
hsa-miR-181a-5p	turquoise	m1	0.380659	-0.346579	-0.464295	0.129942	0.552465	0.801923	0.721107	-0.261093	-0.614515	0.100027	-0.29307	0.207354	-0.286558
hsa-miR-181b-3p	yellow	m12	0.498881	0.616149	0.269042	0.480952	0.240091	0.28811	-0.243637	0.242428	0.0944612	-0.635333	-0.538973	-0.684559	-0.554263
hsa-miR-181b-5p	turquoise	m1	0.554257	-0.0814098	-0.228697	0.487958	0.603779	0.935045	0.63613	-0.226494	-0.624528	-0.206819	-0.498911	-0.00463808	-0.425225
hsa-miR-181c-3p	turquoise	m1	0.190536	-0.333558	-0.54937	0.0729282	0.535207	0.638536	0.604747	-0.155043	-0.431586	0.184908	-0.215085	0.218112	-0.219477
hsa-miR-181c-5p	black	m3	0.00677392	-0.431726	-0.501526	-0.0184826	-0.0330259	0.182636	0.508875	-0.404443	-0.529772	0.60708	0.0663736	0.593709	0.000866141
hsa-miR-181d-5p	pink	m4	0.034543	-0.595807	-0.540347	-0.00708499	0.307658	0.574179	0.859462	-0.367914	-0.732063	0.443336	-0.202855	0.635065	-0.0298971
hsa-miR-182-5p	salmon	m9	-0.450169	-0.193488	0.267858	0.531031	0.342048	0.226967	-0.0155212	0.470232	0.103205	-0.0769933	-0.00308563	0.0623836	0.400042
hsa-miR-183-5p	salmon	m9	-0.664001	-0.273105	0.304969	0.1534	0.0922977	-0.188796	-0.206311	0.471721	0.359299	0.102757	0.364493	0.193031	0.730374
hsa-miR-184	pink	m4	0.405584	-0.138356	-0.328906	0.0523655	0.084369	0.430136	0.757698	-0.51803	-0.661167	-0.109331	-0.281321	0.430149	-0.204835
hsa-miR-1843	green	m13	0.263593	-0.185995	-0.172932	0.281541	0.806709	0.612723	0.4039	0.306319	-0.121176	-0.0736183	-0.0523446	0.030648	-0.128788
hsa-miR-185-3p	green	m13	-0.0196064	-0.185799	-0.188707	0.391137	0.950115	0.541636	0.178976	0.691885	0.18188	-0.0600331	0.051041	-0.147567	-0.165671
hsa-miR-185-5p	green	m13	0.0391857	-0.370988	-0.251078	0.414931	0.946995	0.796875	0.487855	0.398057	-0.211339	0.0277599	-0.151831	0.0452499	-0.154185
hsa-miR-186-5p	black	m3	-0.304416	-0.752318	-0.580862	0.191133	0.614727	0.501964	0.658232	0.16309	-0.306821	0.616808	0.228776	0.671488	0.245552
hsa-miR-187-3p	pink	m4	-0.0157378	-0.29986	-0.245724	0.18786	-0.0620422	0.332507	0.762903	-0.493527	-0.677301	0.115255	-0.296979	0.703923	0.181884
hsa-miR-188-5p	purple	m6	0.16833	0.200795	0.441016	0.874489	0.122651	0.490617	0.125249	-0.0824065	-0.373731	-0.331307	-0.543974	-0.102879	-0.103939
hsa-miR-18a-3p	purple	m6	0.146669	-0.0426723	0.0951609	0.815007	0.763894	0.739978	0.270466	0.362676	-0.183523	-0.203963	-0.241321	-0.113818	-0.177721
hsa-miR-18a-5p	purple	m6	0.0421028	0.48321	0.532049	0.659121	0.137061	0.101585	-0.396465	0.384758	0.188283	-0.522885	-0.360104	-0.533221	-0.213052
hsa-miR-190a-5p	grey	m0	-0.219817	0.0788765	0.184572	0.199402	-0.114726	-0.180405	-0.463868	0.188649	0.217663	0.0295343	0.147725	-0.265484	0.0940232
hsa-miR-190b-5p	red	m2	-0.484275	-0.338746	-0.228717	-0.137839	0.264673	-0.291013	-0.27717	0.615083	0.560729	0.430293	0.692849	0.120741	0.312536
hsa-miR-191-5p	green	m13	-0.297287	-0.574697	-0.491134	0.0302769	0.904216	0.418169	0.323748	0.650633	0.146761	0.375143	0.2589	0.187675	0.0379043
hsa-miR-192-5p	red	m2	-0.576048	-0.295341	-0.000361206	0.326726	0.521594	0.0400053	-0.126568	0.809341	0.379311	0.17301	0.250237	0.065929	0.33638
hsa-miR-193a-3p	black	m3	-0.224963	-0.611704	-0.438513	-0.018664	-0.0150368	0.248995	0.802139	-0.400613	-0.586935	0.435378	0.0194059	0.907447	0.345066
hsa-miR-193a-5p	pink	m4	0.0690572	-0.534093	-0.48285	0.085082	0.323703	0.648359	0.980318	-0.378184	-0.750968	0.208769	-0.280304	0.666986	-0.0242864
hsa-miR-193b-3p	turquoise	m1	0.154167	-0.304775	-0.137983	0.549924	0.280742	0.684562	0.743018	-0.357767	-0.686347	0.0540558	-0.206205	0.508734	0.0829358
hsa-miR-193b-5p	pink	m4	0.153448	-0.377881	-0.344863	0.259745	0.263114	0.658778	0.964443	-0.403541	-0.766794	0.0221197	-0.387748	0.629491	-0.0321411
hsa-miR-194-5p	red	m2	-0.656212	-0.386978	-0.205895	-0.159091	0.440675	-0.261639	-0.298666	0.878197	0.609998	0.453864	0.546694	0.0323022	0.313565
hsa-miR-195-3p	black	m3	-0.554852	-0.419943	-0.0960347	-0.395674	-0.142779	-0.319306	0.166447	0.00593114	0.0826068	0.364507	0.355219	0.53804	0.525576
hsa-miR-195-5p	brown	m11	-0.379673	-0.192602	-0.25911	-0.621873	-0.243262	-0.679292	-0.501966	0.158806	0.565998	0.522948	0.851901	0.0413884	0.363585
hsa-miR-196a-3p	pink	m4	0.116846	-0.507231	-0.491113	0.16015	0.363645	0.695591	0.803677	-0.342997	-0.749495	0.335156	-0.266409	0.457319	-0.17601
hsa-miR-196a-5p	brown	m11	-0.334874	-0.449757	-0.255663	-0.249078	0.0614657	-0.216599	-0.0552174	0.0633997	0.262596	0.51748	0.80234	0.384721	0.583702
hsa-miR-196b-5p	brown	m11	-0.323766	-0.0568423	-0.0989913	-0.553293	-0.102875	-0.671447	-0.585235	0.384257	0.808867	0.318836	0.868196	-0.100226	0.336999
hsa-miR-197-3p	turquoise	m1	0.459762	0.239777	0.138784	0.737768	0.654859	0.758104	0.200992	0.140085	-0.182957	-0.463312	-0.436012	-0.380192	-0.508168
hsa-miR-199a-3p	brown	m11	0.127804	0.214616	0.0291181	-0.571094	-0.474152	-0.658733	-0.496619	-0.184649	0.391146	0.13368	0.54715	-0.132492	0.119671
hsa-miR-199a-5p	tan	m8	0.407177	0.213894	0.0125015	-0.366001	-0.483595	-0.217804	-0.164229	-0.616056	-0.18053	0.170341	0.051531	-0.108418	-0.157508
hsa-miR-199b-3p	brown	m11	0.127807	0.214621	0.0291192	-0.571093	-0.474153	-0.658732	-0.496621	-0.184651	0.391148	0.133671	0.547147	-0.132498	0.119666
hsa-miR-199b-5p	blue	m10	-0.0785538	0.294836	0.22661	-0.422301	-0.56334	-0.730688	-0.761897	-0.051177	0.559959	0.103868	0.462431	-0.304746	0.227142
hsa-miR-19a-3p	greenyellow	m7	-0.325962	-0.331287	-0.152498	0.347412	0.24666	0.165321	0.117033	0.190606	-0.137684	0.44758	0.0922133	0.287637	0.160513
hsa-miR-19b-1-5p	purple	m6	-0.0601135	-0.120696	0.210129	0.830338	0.389886	0.540386	0.265473	0.0665664	-0.264701	-0.0355638	-0.184719	0.161882	0.0755548
hsa-miR-19b-3p	turquoise	m1	0.0422859	-0.408255	-0.261716	0.632876	0.540876	0.801992	0.665017	-0.094137	-0.605719	0.154634	-0.282104	0.371883	-0.0521681
hsa-miR-200a-3p	salmon	m9	-0.569531	-0.655527	-0.131343	-0.174726	-0.196719	-0.149919	0.262276	-0.201963	-0.0946239	0.587648	0.49683	0.790344	0.903088
hsa-miR-200a-5p	black	m3	-0.527861	-0.504506	-0.05273	-0.01938	-0.138871	-0.00948954	0.513638	-0.155671	-0.24467	0.239355	0.0888615	0.806764	0.704989
hsa-miR-200b-3p	salmon	m9	-0.728226	-0.553152	0.0754342	-0.195118	-0.084808	-0.308494	-0.0429152	0.162619	0.283909	0.460545	0.649655	0.54482	0.979387
hsa-miR-200b-5p	salmon	m9	-0.656712	-0.47528	0.0503687	0.116557	0.0784185	-0.147812	0.0913846	0.241132	0.160299	0.348942	0.484654	0.574836	0.830022
hsa-miR-200c-3p	salmon	m9	-0.712997	-0.396443	0.160875	-0.169833	-0.0763735	-0.396449	-0.231524	0.290945	0.468175	0.357006	0.713464	0.356156	0.909788
hsa-miR-200c-5p	black	m3	-0.415317	-0.428596	-0.066164	0.238476	-0.0702331	0.0346314	0.301891	-0.131966	-0.159861	0.282596	0.236265	0.635491	0.568015
hsa-miR-202-5p	brown	m11	-0.521707	-0.403566	-0.246831	-0.384653	0.18364	-0.339159	-0.190198	0.465545	0.554525	0.411354	0.83451	0.208948	0.551614
hsa-miR-203a-3p	magenta	m5	-0.5347	-0.173622	0.627529	0.136997	-0.272499	-0.186228	-0.110322	0.0385933	0.109313	-0.00644829	0.0719325	0.234226	0.709887
hsa-miR-203a-5p	black	m3	-0.35272	-0.574413	-0.156376	0.203788	-0.0817934	0.211035	0.645127	-0.350674	-0.526777	0.393744	0.00763228	0.87228	0.550145
hsa-miR-203b-3p	magenta	m5	-0.383001	-0.0562597	0.562615	0.461626	-0.0913276	-0.0551817	-0.149681	0.128201	0.0660176	-0.0537038	0.105201	0.148038	0.581969
hsa-miR-204-5p	greenyellow	m7	-0.62967	-0.770598	-0.541313	-0.509169	0.0617866	-0.257787	0.200266	0.120205	0.0955981	0.90718	0.728907	0.673892	0.515012
hsa-miR-205-3p	salmon	m9	-0.255898	-0.216293	0.186842	0.398645	0.176682	0.135296	0.192652	0.0578942	0.00118863	0.0526079	0.280293	0.383925	0.510775
hsa-miR-205-5p	salmon	m9	-0.629934	-0.633899	-0.0665722	-0.198579	-0.174916	-0.198429	0.240775	-0.0939627	-0.0406024	0.551757	0.479929	0.774634	0.922525
hsa-miR-20a-3p	red	m2	-0.205989	0.194162	0.212142	-0.207087	0.15871	-0.413827	-0.543373	0.6733	0.723877	-0.00336832	0.439245	-0.337021	0.164764
hsa-miR-20a-5p	blue	m10	-0.402311	0.256436	0.414219	0.0181606	0.142347	-0.414942	-0.703263	0.803376	0.850538	-0.236071	0.2516	-0.500938	0.14559
hsa-miR-20b-5p	red	m2	-0.517011	-0.157843	-0.0345826	-0.0119731	0.544845	-0.165654	-0.361009	0.9807	0.681984	0.125583	0.370435	-0.204939	0.153901
hsa-miR-21-3p	purple	m6	0.497431	0.418861	0.389578	0.913595	0.363224	0.69209	0.0962975	-0.00883353	-0.319873	-0.622085	-0.666113	-0.446647	-0.487296
hsa-miR-21-5p	yellow	m12	0.772039	0.904873	0.537358	0.412946	-0.214321	0.168133	-0.267565	-0.282581	-0.15448	-0.883758	-0.734471	-0.763311	-0.701048
hsa-miR-210-3p	turquoise	m1	0.279038	-0.173969	0.0332381	0.751302	0.442108	0.92619	0.743148	-0.298092	-0.732942	-0.231227	-0.595183	0.246713	-0.164161
hsa-miR-210-5p	purple	m6	0.140246	0.0793445	0.348233	0.839495	0.24683	0.590474	0.387305	-0.11876	-0.385411	-0.379289	-0.427272	0.122755	0.0051064
hsa-miR-211-5p	salmon	m9	-0.637818	-0.582227	-0.11362	-0.303973	-0.0907548	-0.278835	0.000519537	0.0963757	0.176828	0.626791	0.575654	0.550016	0.865113
hsa-miR-2110	pink	m4	0.252413	-0.424703	-0.366874	0.34983	0.656536	0.908803	0.862533	-0.170042	-0.656796	0.0553566	-0.35518	0.347452	-0.214548
hsa-miR-212-3p	turquoise	m1	0.177428	0.312718	0.591859	0.706322	0.413122	0.470486	-0.0726651	0.260202	0.0691279	-0.555844	-0.404523	-0.457695	-0.284815
hsa-miR-212-5p	turquoise	m1	0.375763	0.282525	0.414207	0.653571	0.513017	0.535875	-0.0121427	0.245016	-0.0176973	-0.443876	-0.34798	-0.434062	-0.381
hsa-miR-214-3p	turquoise	m1	0.482827	-0.0570768	0.0222215	0.526226	0.39163	0.841476	0.548948	-0.410321	-0.65782	-0.181059	-0.428704	0.0108856	-0.325452
hsa-miR-214-5p	black	m3	-0.102015	-0.553355	-0.420059	-0.252096	-0.191526	0.134799	0.737214	-0.600047	-0.640481	0.468432	-0.00218671	0.851489	0.29678
hsa-miR-215-5p	greenyellow	m7	-0.315904	-0.447024	-0.258668	0.163941	0.281652	0.178697	0.0983975	0.178109	-0.0483937	0.507176	0.410008	0.229379	0.171199
hsa-miR-217-5p	greenyellow	m7	0.0415135	-0.242559	-0.438769	-0.0816065	0.281128	0.218163	0.118699	0.121712	-0.180046	0.387657	-0.0607189	-0.0539832	-0.414486
hsa-miR-218-5p	black	m3	-0.636562	-0.814116	-0.375765	-0.223031	-0.0910978	-0.0824919	0.44078	-0.144388	-0.180302	0.726893	0.493251	0.919428	0.772411
hsa-miR-22-3p	pink	m4	0.124549	-0.581286	-0.534846	0.108504	0.361706	0.675109	0.9084	-0.409615	-0.764477	0.383662	-0.17879	0.633848	-0.0527781
hsa-miR-22-5p	pink	m4	0.528726	-0.057904	-0.393138	0.0698471	0.189306	0.543593	0.682021	-0.46553	-0.669607	-0.0490138	-0.327302	0.222944	-0.429246
hsa-miR-221-3p	black	m3	-0.506558	-0.659861	-0.0890336	0.138664	0.360045	0.199357	0.424146	0.251877	-0.0848977	0.424029	0.375063	0.634388	0.593004
hsa-miR-221-5p	salmon	m9	-0.522797	-0.116513	0.480436	-0.105465	-0.316998	-0.405664	-0.285005	0.177625	0.335462	0.017903	0.261735	0.133232	0.648755
hsa-miR-222-3p	turquoise	m1	-0.273785	-0.516294	-0.0121739	0.516681	0.38981	0.52225	0.615767	0.0633071	-0.405596	0.188002	-0.03955	0.587419	0.37725
hsa-miR-222-5p	red	m2	-0.122367	0.32993	0.335337	0.421244	0.105168	-0.0152359	-0.389672	0.460516	0.3598	-0.373989	-0.0890475	-0.468183	-0.211298
hsa-miR-223-3p	red	m2	-0.257487	-0.00872126	-0.168709	-0.211538	0.436928	-0.217839	-0.334428	0.820484	0.69721	0.00154772	0.291006	-0.31056	-0.135067
hsa-miR-223-5p	red	m2	-0.316707	-0.00844365	-0.125864	-0.2634	0.400543	-0.306854	-0.391989	0.842278	0.780623	0.0261088	0.374524	-0.294955	-0.0566022
hsa-miR-224-3p	black	m3	-0.44642	-0.689977	-0.32975	-0.118614	-0.11497	0.0312104	0.543605	-0.334073	-0.367243	0.624122	0.384381	0.881036	0.59394
hsa-miR-224-5p	salmon	m9	-0.455214	-0.035887	0.469529	-0.02999	-0.30173	-0.341453	-0.368653	0.0785071	0.304634	0.0458249	0.337659	-0.010099	0.533715
hsa-miR-2277-5p	turquoise	m1	0.351387	-0.0250807	0.140834	0.749775	0.621283	0.922769	0.417139	-0.022886	-0.413454	-0.325149	-0.492456	-0.149401	-0.279388
hsa-miR-2355-3p	purple	m6	0.0983474	0.099758	0.317287	0.797076	0.531718	0.67362	0.150688	0.257043	-0.168092	-0.419308	-0.473952	-0.2847	-0.195691
hsa-miR-23a-3p	black	m3	-0.597788	-0.802585	-0.399293	-0.221344	0.202153	-0.0239576	0.423206	0.099023	-0.0212499	0.712324	0.641079	0.832828	0.731062
hsa-miR-23a-5p	pink	m4	0.233835	0.0422049	-0.145562	0.270094	0.185588	0.256616	0.452615	-0.0294135	-0.296776	-0.131558	-0.173964	0.274209	-0.144988
hsa-miR-23b-3p	salmon	m9	-0.67542	-0.700293	-0.29518	-0.405386	-0.0521445	-0.310114	0.158144	0.0847451	0.151551	0.727228	0.721613	0.738502	0.857305
hsa-miR-23b-5p	black	m3	-0.349973	-0.737057	-0.305341	-0.0720212	0.00413581	0.148771	0.651985	-0.282197	-0.441657	0.584552	0.250547	0.932318	0.609538
hsa-miR-24-1-5p	black	m3	-0.419899	-0.621944	-0.496304	-0.472291	-0.262027	-0.229936	0.460617	-0.341342	-0.271362	0.636252	0.395646	0.874795	0.560267
hsa-miR-24-2-5p	pink	m4	-0.221715	-0.673743	-0.425939	-0.0760617	0.0927682	0.347532	0.890007	-0.381333	-0.649335	0.408214	-0.0827613	0.898421	0.336406
hsa-miR-24-3p	black	m3	-0.55825	-0.788036	-0.456709	-0.423878	-0.0498643	-0.157209	0.491123	-0.130047	-0.168069	0.744639	0.491368	0.931631	0.668913
hsa-miR-25-3p	red	m2	-0.47147	-0.26068	-0.0532997	0.0982076	0.692969	0.0605775	-0.149428	0.953507	0.513511	0.116487	0.250814	-0.109859	0.167182
hsa-miR-25-5p	turquoise	m1	0.288515	-0.18033	-0.147591	0.698934	0.672013	0.964574	0.669832	-0.0447269	-0.583617	-0.179302	-0.51269	0.112786	-0.26241
hsa-miR-26a-2-3p	yellow	m12	0.343483	0.698454	0.343697	0.164473	-0.232371	-0.329617	-0.637988	0.161842	0.436842	-0.456977	-0.0215915	-0.600593	-0.28981
hsa-miR-26a-5p	brown	m11	-0.677947	-0.587977	-0.402224	-0.563754	0.0950339	-0.470125	-0.19398	0.438848	0.580011	0.753286	0.895943	0.374429	0.585745
hsa-miR-26b-3p	red	m2	-0.490684	-0.508532	-0.429524	-0.103901	0.556479	-0.006291	-0.0715767	0.694778	0.426436	0.490593	0.656902	0.126113	0.250692
hsa-miR-26b-5p	blue	m10	-0.562883	-0.234693	-0.203613	-0.47806	0.185865	-0.534246	-0.495214	0.733225	0.887223	0.372469	0.786024	-0.0717756	0.341625
hsa-miR-27a-3p	brown	m11	-0.660173	-0.521384	-0.288351	-0.571722	0.05411	-0.522276	-0.176279	0.436181	0.580984	0.645472	0.89568	0.390152	0.610269
hsa-miR-27a-5p	purple	m6	0.121532	0.0274138	0.344365	0.916517	0.361292	0.679876	0.385788	0.00333632	-0.396825	-0.34823	-0.504148	0.0660708	-0.0501895
hsa-miR-27b-3p	salmon	m9	-0.616109	-0.25847	0.129303	-0.502276	-0.254257	-0.664903	-0.481815	0.266835	0.622898	0.43944	0.722165	0.165834	0.765863
hsa-miR-27b-5p	turquoise	m1	-0.0194104	-0.433652	-0.0343689	0.544427	0.187293	0.646598	0.710886	-0.408935	-0.742117	0.118103	-0.304634	0.596197	0.303992
hsa-miR-28-3p	turquoise	m1	0.295393	-0.324008	-0.24674	0.49184	0.615519	0.948821	0.72211	-0.209003	-0.693616	0.00865226	-0.432629	0.182915	-0.26601
hsa-miR-28-5p	greenyellow	m7	-0.398723	-0.626007	-0.582414	-0.406087	0.173745	-0.160544	0.118591	0.144286	0.0435942	0.914862	0.613102	0.481262	0.264491
hsa-miR-296-3p	turquoise	m1	0.197282	-0.308048	-0.129918	0.532748	0.45444	0.847211	0.891556	-0.270721	-0.727168	-0.0846523	-0.522026	0.437966	-0.1491
hsa-miR-299-3p	purple	m6	0.31032	0.143801	0.508174	0.929082	0.263919	0.653061	0.201037	-0.167014	-0.410029	-0.334407	-0.453775	-0.105331	-0.133286
hsa-miR-299-5p	magenta	m5	0.386044	0.597994	0.85994	0.29985	-0.315948	-0.0680156	-0.318921	-0.198432	0.0273042	-0.660885	-0.323409	-0.455975	-0.171681
hsa-miR-29a-3p	greenyellow	m7	-0.548416	-0.557171	-0.466187	-0.483991	-0.0417697	-0.45134	-0.08476	0.190923	0.295062	0.871486	0.834279	0.516063	0.544103
hsa-miR-29a-5p	turquoise	m1	0.362115	-0.10752	-0.0618873	0.78294	0.498108	0.908031	0.582063	-0.238	-0.675914	-0.164019	-0.520063	0.0819941	-0.325698
hsa-miR-29b-1-5p	red	m2	-0.0376568	0.228023	0.0799706	0.320794	0.31513	0.176112	0.0392768	0.419931	0.147473	-0.385584	-0.257527	-0.192246	-0.162432
hsa-miR-29b-2-5p	greenyellow	m7	-0.34874	-0.761436	-0.574802	-0.117915	0.380851	0.236025	0.346732	0.0270033	-0.200286	0.829589	0.431029	0.519047	0.237271
hsa-miR-29b-3p	black	m3	-0.111413	-0.449439	-0.539281	0.159719	0.127718	0.261425	0.464017	-0.205234	-0.398886	0.600126	0.147424	0.582562	0.120265
hsa-miR-29c-3p	greenyellow	m7	-0.283256	-0.28863	-0.16665	0.268162	0.0912203	-0.0130853	-0.0720945	0.100455	0.0423465	0.521486	0.428184	0.282693	0.355164
hsa-miR-29c-5p	black	m3	-0.231251	-0.673923	-0.577601	-0.170061	0.0458798	0.223701	0.807468	-0.349891	-0.532745	0.542265	0.133183	0.925816	0.37196
hsa-miR-301a-5p	red	m2	-0.258042	0.0770895	0.234969	-0.113736	0.249548	-0.264144	-0.364027	0.678383	0.628474	-0.0175817	0.204403	-0.224195	0.141734
hsa-miR-3065-5p	magenta	m5	-0.0266082	0.345647	0.556806	0.210678	-0.514301	-0.345718	-0.35551	-0.198396	0.11739	-0.256674	-0.00700104	-0.0569426	0.312959
hsa-miR-3074-5p	turquoise	m1	-0.01714	-0.419748	-0.111764	0.61627	0.699334	0.794752	0.559711	0.108433	-0.366882	0.078889	-0.151784	0.264718	0.0427939
hsa-miR-30a-3p	black	m3	-0.297461	-0.85706	-0.643976	-0.0996078	0.280758	0.395123	0.7966	-0.237741	-0.56843	0.721043	0.166555	0.860819	0.316198
hsa-miR-30a-5p	greenyellow	m7	-0.61382	-0.802012	-0.571242	-0.38524	-0.00796548	-0.211733	0.207142	-0.00411215	-0.0174876	0.897463	0.715358	0.738052	0.655598
hsa-miR-30b-3p	black	m3	-0.346007	-0.72106	-0.550453	-0.134372	0.104235	0.213723	0.809888	-0.232598	-0.461177	0.522336	0.134759	0.944093	0.403865
hsa-miR-30b-5p	brown	m11	-0.58026	-0.537954	-0.293255	-0.198697	0.11106	-0.257691	-0.144755	0.315828	0.370201	0.670487	0.823134	0.359364	0.586524
hsa-miR-30c-1-3p	black	m3	-0.224201	-0.741543	-0.487777	0.114855	0.499944	0.449101	0.70601	0.013719	-0.348584	0.550398	0.282662	0.742097	0.302008
hsa-miR-30c-2-3p	black	m3	-0.353634	-0.870879	-0.695111	-0.221289	0.224548	0.27242	0.713356	-0.217604	-0.463385	0.799008	0.300069	0.868171	0.384087
hsa-miR-30c-5p	brown	m11	-0.702494	-0.716283	-0.401291	-0.380702	0.144904	-0.292003	-0.0490417	0.335472	0.361599	0.832712	0.858508	0.521141	0.706646
hsa-miR-30d-3p	black	m3	-0.458677	-0.769399	-0.51753	-0.212683	0.000349408	0.0874923	0.680226	-0.243506	-0.420135	0.708643	0.241029	0.969131	0.546838
hsa-miR-30d-5p	greenyellow	m7	-0.750263	-0.855393	-0.502693	-0.451797	0.173543	-0.226037	0.235868	0.256259	0.157075	0.850861	0.740037	0.758191	0.742043
hsa-miR-30e-3p	red	m2	-0.717974	-0.581568	-0.276748	-0.239375	0.405817	-0.21826	-0.0534339	0.696129	0.53512	0.523709	0.645672	0.358014	0.570484
hsa-miR-30e-5p	brown	m11	-0.512501	-0.40859	-0.274274	-0.0515229	0.253043	-0.245055	-0.185238	0.523287	0.450869	0.514668	0.661123	0.273132	0.48539
hsa-miR-31-3p	yellow	m12	0.737149	0.958115	0.4889	0.214557	-0.45346	-0.107377	-0.365586	-0.375923	-0.0729591	-0.780697	-0.566656	-0.67648	-0.602357
hsa-miR-31-5p	yellow	m12	0.758993	0.846178	0.456898	0.254326	-0.343725	-0.00373338	-0.274545	-0.354853	-0.137139	-0.749675	-0.527915	-0.629472	-0.629848
hsa-miR-3117-3p	tan	m8	0.784793	0.715847	0.155216	-0.116738	-0.266641	-0.0729031	-0.238567	-0.358137	-0.059898	-0.529061	-0.320079	-0.569905	-0.630512
hsa-miR-3129-3p	magenta	m5	0.323422	0.381916	0.560436	0.675892	0.0859273	0.446271	0.00129674	-0.107526	-0.216794	-0.565483	-0.618345	-0.394016	-0.331037
hsa-miR-3158-3p	turquoise	m1	-0.358148	-0.50382	-0.195595	0.299481	0.586608	0.532663	0.639405	0.341288	-0.26566	0.11326	-0.232934	0.42813	0.0966761
hsa-miR-3199	black	m3	-0.510051	-0.812399	-0.624872	-0.329409	0.171339	0.115456	0.70435	-0.0458906	-0.296209	0.644853	0.29834	0.880536	0.434594
hsa-miR-32-3p	blue	m10	-0.572478	-0.0683998	0.152253	-0.310912	0.123567	-0.494201	-0.51553	0.754426	0.899747	0.0512824	0.543869	-0.174168	0.370709
hsa-miR-32-5p	blue	m10	-0.493863	-0.0563844	0.056136	-0.241071	0.0354582	-0.536053	-0.530439	0.637041	0.755956	0.225238	0.571032	-0.0859761	0.38487
hsa-miR-3200-3p	green	m13	-0.14918	-0.312938	0.0134605	0.522046	0.82162	0.578644	0.161691	0.529922	0.0109577	0.0314065	-0.00228664	-0.0273125	0.112449
hsa-miR-320a-3p	pink	m4	0.201052	-0.435034	-0.400762	0.269331	0.469828	0.821813	0.95829	-0.318574	-0.753629	0.0509395	-0.401155	0.495306	-0.150429
hsa-miR-320b	pink	m4	-0.108356	-0.60412	-0.42029	0.0829153	0.232202	0.512387	0.956067	-0.331964	-0.661489	0.268688	-0.157281	0.822703	0.217433
hsa-miR-320c	pink	m4	-0.16252	-0.631238	-0.4586	-0.00207227	0.170418	0.421923	0.921231	-0.330461	-0.61601	0.333169	-0.066431	0.858222	0.270585
hsa-miR-320d	pink	m4	-0.155499	-0.562411	-0.43757	-0.0535713	0.0897805	0.340076	0.896643	-0.354132	-0.613552	0.28319	-0.145943	0.838106	0.211326
hsa-miR-323a-3p	magenta	m5	0.18186	0.411377	0.876788	0.385585	-0.194905	0.0538897	-0.248322	-0.0557575	0.0280127	-0.592561	-0.422157	-0.398896	-0.0798435
hsa-miR-323b-3p	magenta	m5	0.310684	0.619758	0.843217	0.549415	-0.217109	0.140353	-0.231985	-0.112061	-0.0906575	-0.677334	-0.65477	-0.487259	-0.245534
hsa-miR-324-3p	turquoise	m1	0.0588633	-0.429224	-0.374881	0.486429	0.761802	0.777608	0.672514	0.163926	-0.428418	0.183591	-0.0986905	0.345332	-0.044287
hsa-miR-324-5p	turquoise	m1	0.290779	-0.219722	-0.25373	0.623268	0.689168	0.867094	0.553812	-0.0102422	-0.458104	-0.0348195	-0.252824	0.0984541	-0.245408
hsa-miR-326	turquoise	m1	0.365662	-0.261752	-0.287401	0.455459	0.636596	0.936335	0.7646	-0.143117	-0.65948	-0.0665895	-0.447388	0.181432	-0.309082
hsa-miR-328-3p	black	m3	-0.30041	-0.804644	-0.627525	-0.220734	0.258969	0.316121	0.838046	-0.200113	-0.482767	0.620418	0.161654	0.885659	0.315647
hsa-miR-329-3p	magenta	m5	0.0368381	0.238697	0.900269	0.619834	-0.0212057	0.174285	-0.191922	0.0277933	0.024649	-0.427474	-0.246659	-0.229251	0.170204
hsa-miR-330-3p	turquoise	m1	0.32025	-0.289787	-0.280475	0.246282	0.606512	0.853926	0.731775	-0.156168	-0.563264	-0.0594585	-0.395534	0.173325	-0.230164
hsa-miR-330-5p	pink	m4	0.0713743	-0.418256	-0.404396	0.0815871	0.21775	0.497648	0.923179	-0.321288	-0.64873	0.128279	-0.282756	0.698758	0.0363977
hsa-miR-331-3p	turquoise	m1	0.406674	-0.0910381	-0.0824814	0.60725	0.63406	0.958255	0.605635	-0.118097	-0.574593	-0.240408	-0.530276	-0.0129486	-0.310364
hsa-miR-331-5p	magenta	m5	-0.0013463	0.458738	0.508604	0.272768	-0.0648127	-0.193993	-0.478575	0.248309	0.453323	-0.337028	0.0677769	-0.399895	0.0276902
hsa-miR-335-3p	brown	m11	-0.475733	-0.318225	-0.0864745	-0.189126	0.092568	-0.17971	-0.170526	0.342561	0.356281	0.346481	0.510385	0.0690766	0.258794
hsa-miR-335-5p	greenyellow	m7	-0.520278	-0.638257	-0.443959	-0.357419	0.0422519	-0.166331	0.0430767	0.0883122	0.0584001	0.859682	0.605974	0.411963	0.303128
hsa-miR-337-3p	magenta	m5	0.123355	0.489977	0.875341	0.159295	-0.339434	-0.274797	-0.534829	-0.0263983	0.312033	-0.482247	-0.0457823	-0.464234	0.0413636
hsa-miR-337-5p	turquoise	m1	0.323214	-0.100404	0.159383	0.729783	0.268095	0.74062	0.480026	-0.38151	-0.621149	-0.154473	-0.36776	0.153861	-0.081955
hsa-miR-338-3p	black	m3	-0.441412	-0.736446	-0.404544	-0.253198	0.094123	0.0462183	0.441286	-0.0878614	-0.119662	0.633039	0.382829	0.759555	0.607063
hsa-miR-338-5p	red	m2	-0.574672	-0.512318	-0.294151	-0.352455	0.394622	-0.226213	-0.0540176	0.619021	0.574227	0.428948	0.630676	0.280935	0.476365
hsa-miR-339-3p	pink	m4	0.122689	-0.520671	-0.439884	0.264241	0.489563	0.793345	0.970623	-0.281408	-0.76149	0.193181	-0.360656	0.586514	-0.0856054
hsa-miR-339-5p	red	m2	0.0418086	0.188805	0.208971	0.380846	0.420828	0.171354	-0.241267	0.529269	0.233447	-0.029238	-0.119557	-0.36411	-0.222964
hsa-miR-33a-3p	magenta	m5	-0.015422	0.513161	0.640605	0.309605	-0.270717	-0.192578	-0.562473	0.0916054	0.387835	-0.426421	-0.152732	-0.480739	0.106985
hsa-miR-33a-5p	black	m3	-0.283188	-0.54259	-0.259902	0.0803347	-0.0970783	0.192031	0.661342	-0.347492	-0.556928	0.475083	-0.120576	0.821419	0.329924
hsa-miR-340-3p	red	m2	-0.513081	-0.242223	-0.218844	-0.454211	0.300255	-0.409995	-0.341532	0.749569	0.762595	0.307084	0.587029	-0.0386727	0.255951
hsa-miR-340-5p	blue	m10	-0.291226	0.31975	0.288803	-0.126058	0.0846649	-0.463699	-0.690323	0.762054	0.837438	-0.251916	0.17997	-0.549465	-0.00460028
hsa-miR-342-3p	turquoise	m1	0.605192	0.245735	0.07748	0.742961	0.440101	0.846889	0.348302	-0.215164	-0.510741	-0.428816	-0.620492	-0.271808	-0.502067
hsa-miR-342-5p	turquoise	m1	0.219421	-0.324931	-0.248725	0.605704	0.590299	0.915257	0.824978	-0.186438	-0.663993	-0.0272899	-0.43802	0.367682	-0.158919
hsa-miR-345-5p	pink	m4	0.143223	-0.480791	-0.425668	0.239715	0.523294	0.785271	0.955499	-0.223231	-0.699156	0.145518	-0.358693	0.541744	-0.120686
hsa-miR-34a-5p	tan	m8	0.927295	0.693111	0.157337	0.171053	-0.133882	0.197391	-0.0905429	-0.414414	-0.258834	-0.552275	-0.439956	-0.540444	-0.708094
hsa-miR-34b-3p	tan	m8	0.825295	0.716965	0.202603	0.272908	-0.197255	0.262069	-0.0219703	-0.529961	-0.307993	-0.649483	-0.584529	-0.510136	-0.664912
hsa-miR-34c-3p	tan	m8	0.860918	0.391118	-0.0176608	0.431009	0.302195	0.676337	0.262013	-0.358874	-0.471992	-0.490826	-0.551906	-0.391796	-0.683575
hsa-miR-34c-5p	tan	m8	0.974718	0.723125	0.213932	0.354006	-0.102282	0.337472	0.0185479	-0.489332	-0.388876	-0.685839	-0.636687	-0.531636	-0.774684
hsa-miR-3605-3p	turquoise	m1	0.609696	0.0507636	-0.292008	0.250439	0.571642	0.711934	0.365824	-0.0813296	-0.382773	-0.142272	-0.31122	-0.246758	-0.634788
hsa-miR-3609	tan	m8	0.704961	0.145541	-0.198734	0.074609	0.207907	0.396019	0.291676	-0.295001	-0.328839	-0.160857	-0.18019	-0.0879327	-0.44013
hsa-miR-361-3p	turquoise	m1	0.180909	-0.265546	-0.179414	0.44747	0.538964	0.837487	0.736093	-0.11662	-0.596077	-0.0358361	-0.499194	0.26796	-0.122788
hsa-miR-361-5p	blue	m10	-0.3009	-0.0634877	-0.0631813	-0.294207	0.301526	-0.362445	-0.519141	0.666261	0.839466	0.222475	0.707706	-0.239836	0.215234
hsa-miR-3614-5p	red	m2	-0.238523	-0.06659	-0.170062	0.100679	0.656733	0.085304	-0.194798	0.845207	0.523356	-0.0191985	0.266654	-0.296417	-0.102905
hsa-miR-3615	red	m2	-0.335225	-0.435172	-0.417546	-0.127249	0.639908	0.14744	0.343064	0.583885	0.206728	0.276684	0.302071	0.316421	0.094494
hsa-miR-3617-5p	black	m3	-0.586489	-0.768298	-0.292346	-0.120782	0.0700252	0.00712247	0.485848	-0.0698246	-0.217752	0.606563	0.380481	0.883734	0.744241
hsa-miR-362-3p	purple	m6	0.160707	0.364506	0.526455	0.879952	0.125027	0.320615	-0.119084	0.0526851	-0.143357	-0.443295	-0.393456	-0.274069	-0.134867
hsa-miR-362-5p	turquoise	m1	0.168404	-0.32444	-0.149761	0.632287	0.715246	0.953285	0.697257	-0.000102469	-0.57199	-0.0156247	-0.43349	0.207949	-0.159005
hsa-miR-363-3p	red	m2	-0.618549	-0.371404	-0.191972	-0.0443081	0.602673	-0.0823625	-0.149903	0.945762	0.55799	0.288992	0.40742	0.0219921	0.229723
hsa-miR-365a-3p	brown	m11	-0.280349	-0.061692	0.0191943	-0.335356	-0.217692	-0.494849	-0.431193	0.111541	0.464217	0.361814	0.75165	0.0106901	0.356819
hsa-miR-365a-5p	turquoise	m1	0.252463	-0.102547	0.0398414	0.789924	0.41297	0.87204	0.678381	-0.239046	-0.697323	-0.275219	-0.580742	0.199149	-0.18536
hsa-miR-365b-3p	brown	m11	-0.280349	-0.061692	0.0191943	-0.335356	-0.217692	-0.494849	-0.431193	0.111541	0.464217	0.361814	0.75165	0.0106901	0.356819
hsa-miR-365b-5p	turquoise	m1	0.24157	-0.1994	0.0169961	0.761915	0.664061	0.931515	0.647468	-0.0439042	-0.526457	-0.145944	-0.382173	0.166847	-0.165705
hsa-miR-3688-3p	red	m2	-0.547583	-0.19828	-0.131185	-0.0552145	0.415396	-0.150351	-0.257969	0.854728	0.544496	0.117304	0.229926	-0.123556	0.125611
hsa-miR-369-3p	magenta	m5	-0.0226778	0.363127	0.899739	0.137224	-0.29601	-0.268205	-0.479437	0.0495374	0.350157	-0.456087	-0.0802352	-0.3695	0.185111
hsa-miR-370-3p	turquoise	m1	0.253687	-0.222474	0.144805	0.619491	0.340575	0.839978	0.745492	-0.376418	-0.74438	-0.213169	-0.573504	0.314628	-0.0443506
hsa-miR-372-3p	turquoise	m1	0.425833	-0.17091	-0.183174	0.232323	0.398574	0.713913	0.541403	-0.22312	-0.612152	-0.0245712	-0.428679	0.0196556	-0.415626
hsa-miR-374a-3p	yellow	m12	0.150347	0.747227	0.485824	-0.191166	-0.40541	-0.584381	-0.812867	0.176735	0.67231	-0.537843	0.0059832	-0.738135	-0.188568
hsa-miR-374a-5p	blue	m10	-0.437165	0.140158	0.257255	-0.328456	-0.0859387	-0.647789	-0.788791	0.593926	0.943318	0.0685871	0.573409	-0.369722	0.307384
hsa-miR-374b-3p	blue	m10	-0.167738	0.380715	0.387984	-0.39146	-0.211172	-0.625767	-0.745692	0.447237	0.816804	-0.180299	0.273838	-0.496338	0.123692
hsa-miR-374b-5p	blue	m10	-0.39651	0.0538548	0.0391453	-0.396509	0.139046	-0.562539	-0.655955	0.729934	0.96634	0.115515	0.625269	-0.334153	0.181244
hsa-miR-375-3p	black	m3	-0.501911	-0.692851	-0.439839	-0.182511	0.0395573	0.0214487	0.658826	-0.093025	-0.293789	0.533863	0.244095	0.928371	0.508106
hsa-miR-376a-3p	magenta	m5	0.035769	0.421852	0.892685	0.681961	-0.152849	0.0374946	-0.324264	0.0426739	0.0726164	-0.506742	-0.324329	-0.336166	0.0119938
hsa-miR-376a-5p	yellow	m12	0.394823	0.668725	0.469097	-0.125173	-0.675218	-0.468253	-0.415549	-0.37851	0.0606134	-0.352583	-0.173021	-0.349669	-0.257393
hsa-miR-376b-3p	purple	m6	0.379859	0.163656	0.327864	0.908436	0.3882	0.774632	0.221379	-0.1351	-0.432931	-0.385929	-0.5367	-0.239783	-0.32261
hsa-miR-376b-5p	magenta	m5	0.406408	0.706618	0.803573	0.251356	-0.345472	-0.181325	-0.476513	-0.141783	0.197378	-0.645944	-0.263604	-0.582741	-0.241737
hsa-miR-376c-3p	purple	m6	0.368919	0.334148	0.52279	0.784581	-0.0207014	0.369584	-0.0176502	-0.295581	-0.3085	-0.381885	-0.320643	-0.199479	-0.154317
hsa-miR-376c-5p	magenta	m5	0.533528	0.80611	0.731229	0.20544	-0.401137	-0.214756	-0.49362	-0.211679	0.167222	-0.627573	-0.269423	-0.610303	-0.327732
hsa-miR-377-3p	pink	m4	0.202171	-0.272848	-0.18558	0.167064	-0.15731	0.2711	0.395009	-0.655	-0.600643	0.310844	0.00353667	0.443622	0.124299
hsa-miR-377-5p	turquoise	m1	0.398875	-0.199643	0.0405797	0.608881	0.475979	0.885303	0.725569	-0.324089	-0.688606	-0.169407	-0.459135	0.246101	-0.169312
hsa-miR-378a-3p	turquoise	m1	0.145564	-0.438909	-0.24564	0.573341	0.537251	0.913699	0.837568	-0.265321	-0.739394	0.0694612	-0.356288	0.447154	-0.00564551
hsa-miR-378a-5p	greenyellow	m7	-0.390454	-0.672194	-0.403178	-0.0464656	0.586125	0.239084	0.194731	0.356091	0.10968	0.716083	0.572679	0.357845	0.372056
hsa-miR-378c	turquoise	m1	0.149622	-0.397166	-0.243915	0.612754	0.51516	0.898054	0.848334	-0.245552	-0.733795	0.038671	-0.385175	0.451941	-0.0476858
hsa-miR-378d	turquoise	m1	0.149312	-0.396065	-0.242134	0.614182	0.514312	0.897483	0.848172	-0.245164	-0.733338	0.0373562	-0.385913	0.452153	-0.04759
hsa-miR-378e	turquoise	m1	0.158606	-0.43444	-0.293585	0.488682	0.617778	0.918436	0.862614	-0.160847	-0.6837	0.0441416	-0.380609	0.396785	-0.100901
hsa-miR-378f	turquoise	m1	0.019431	-0.345752	-0.223748	0.495717	0.280256	0.668685	0.788567	-0.293197	-0.729743	0.0967202	-0.360108	0.561338	0.119284
hsa-miR-378g	pink	m4	0.115702	-0.469732	-0.328245	0.33319	0.454247	0.827814	0.947962	-0.320635	-0.760347	0.0669461	-0.391991	0.532204	-0.0408392
hsa-miR-378i	pink	m4	-0.142483	-0.623546	-0.386714	0.298284	0.259637	0.523353	0.833461	-0.282382	-0.596103	0.375178	-0.0308125	0.819028	0.306929
hsa-miR-379-3p	magenta	m5	-0.00637167	0.446328	0.927944	0.277551	-0.32035	-0.167569	-0.423684	-0.0146741	0.228377	-0.493031	-0.278136	-0.377182	0.1334
hsa-miR-379-5p	magenta	m5	0.19362	0.274446	0.825737	0.620004	-0.176764	0.248657	-0.0102897	-0.30996	-0.263703	-0.496007	-0.458422	-0.12804	0.087391
hsa-miR-380-5p	purple	m6	0.275689	0.388641	0.688586	0.857689	-0.0227391	0.350722	-0.0797022	-0.162724	-0.222119	-0.496142	-0.474839	-0.273947	-0.125115
hsa-miR-381-3p	black	m3	-0.249213	-0.488957	0.0935343	0.166637	-0.196559	0.221324	0.601742	-0.501441	-0.557992	0.235886	-0.0632704	0.767264	0.544917
hsa-miR-382-3p	magenta	m5	0.342527	0.616098	0.938457	0.417825	-0.300339	0.0173251	-0.327645	-0.191894	0.00896406	-0.716241	-0.480223	-0.508372	-0.143277
hsa-miR-382-5p	turquoise	m1	0.536716	-0.00289571	0.147807	0.626857	0.380538	0.884244	0.616802	-0.402172	-0.719313	-0.371117	-0.640303	0.0199555	-0.343977
hsa-miR-383-5p	black	m3	-0.296767	-0.58488	-0.476259	-0.169631	0.0652085	0.140503	0.725361	-0.188649	-0.394663	0.414384	0.153271	0.816699	0.292714
hsa-miR-3909	grey	m0	0.0147092	-0.244903	-0.201279	-0.406085	0.291099	0.0608591	0.266986	0.107068	0.0370431	0.14524	0.135407	0.168374	-0.0272254
hsa-miR-3912-3p	grey	m0	-0.0685996	-0.106861	-0.347307	-0.180218	0.0197107	-0.156867	0.0960379	0.0255825	0.208215	0.154422	0.301998	0.261264	0.174979
hsa-miR-3913-5p	pink	m4	0.251845	-0.399905	-0.469701	0.231558	0.334122	0.716865	0.936345	-0.412019	-0.79173	0.0775213	-0.354134	0.541436	-0.164255
hsa-miR-3928-3p	pink	m4	-0.0119351	-0.472031	-0.329418	0.329423	0.427984	0.692815	0.888484	-0.186435	-0.649632	0.0507186	-0.314211	0.557812	-0.0249323
hsa-miR-3934-5p	turquoise	m1	0.252178	-0.122003	0.0792071	0.820668	0.400449	0.838038	0.633164	-0.252689	-0.643641	-0.208318	-0.523648	0.242583	-0.111811
hsa-miR-3940-3p	red	m2	-0.198893	0.216924	0.291562	-0.0945908	0.173321	-0.227159	-0.417872	0.507759	0.474941	-0.2048	0.0641418	-0.377816	0.0630072
hsa-miR-409-3p	turquoise	m1	0.432721	-0.0706863	0.195458	0.666881	0.401403	0.901994	0.61051	-0.351739	-0.696044	-0.329153	-0.609625	0.0610737	-0.212831
hsa-miR-409-5p	magenta	m5	0.0897321	0.398059	0.939428	0.324797	-0.330099	-0.107783	-0.393929	-0.118103	0.0873059	-0.481906	-0.268826	-0.36373	0.133895
hsa-miR-410-3p	magenta	m5	0.218244	0.661357	0.938273	0.410839	-0.386442	-0.190605	-0.517722	-0.086296	0.20303	-0.635028	-0.27289	-0.527962	-0.0933919
hsa-miR-411-3p	magenta	m5	-0.0968818	0.363753	0.901428	0.402672	-0.144281	-0.0692406	-0.353554	0.128419	0.218838	-0.444058	-0.262058	-0.326852	0.123818
hsa-miR-411-5p	magenta	m5	-0.0943383	0.315255	0.826669	0.0006912	-0.461676	-0.433431	-0.504992	-0.0644526	0.316473	-0.31243	0.00642133	-0.247345	0.293107
hsa-miR-412-5p	magenta	m5	0.313661	0.223134	0.353086	-0.0523964	-0.324844	-0.103238	-0.0730889	-0.299857	-0.134966	-0.297609	-0.148719	-0.106268	-0.00998167
hsa-miR-421	red	m2	0.068983	0.302587	0.384469	0.599504	0.548868	0.287997	-0.315423	0.602103	0.342262	-0.375651	-0.16671	-0.553574	-0.246612
hsa-miR-423-3p	turquoise	m1	0.0902259	-0.348321	-0.0596479	0.448556	0.806084	0.82367	0.600748	0.227999	-0.286541	-0.0525985	-0.255131	0.161833	-0.0526009
hsa-miR-423-5p	pink	m4	0.0223417	-0.489017	-0.301946	0.254505	0.552742	0.754574	0.890282	-0.0760416	-0.596198	0.0811576	-0.316322	0.506174	-0.0132069
hsa-miR-424-3p	turquoise	m1	0.557014	0.487188	0.49547	0.621001	0.252084	0.604423	0.0595907	-0.0529501	-0.250949	-0.688844	-0.733831	-0.55711	-0.52902
hsa-miR-424-5p	tan	m8	0.772195	0.765046	0.233948	0.252572	0.0882878	0.214235	-0.243179	-0.0401421	0.022364	-0.716052	-0.531446	-0.802957	-0.859888
hsa-miR-425-3p	green	m13	0.171697	-0.220163	-0.211977	0.488543	0.947124	0.775851	0.42143	0.418473	-0.121903	-0.0718355	-0.138979	-0.0539479	-0.278215
hsa-miR-425-5p	turquoise	m1	0.226346	-0.128878	-0.0611772	0.726306	0.752859	0.919501	0.50834	0.15798	-0.429792	-0.239617	-0.4618	-0.0472027	-0.281172
hsa-miR-4286	brown	m11	-0.407657	-0.562308	-0.371679	-0.245802	0.420687	-0.0522127	0.187762	0.439089	0.186801	0.448207	0.593433	0.411025	0.390588
hsa-miR-429	salmon	m9	-0.749922	-0.632075	-0.0810071	-0.359574	-0.0414751	-0.365743	-0.0601328	0.22509	0.374705	0.591634	0.781899	0.555536	0.9494
hsa-miR-431-5p	magenta	m5	0.330741	0.483076	0.827534	0.80137	-0.0127349	0.379662	-0.0899874	-0.137847	-0.216164	-0.666269	-0.624236	-0.406726	-0.234579
hsa-miR-432-5p	purple	m6	0.329375	0.1724	0.511883	0.921564	0.234635	0.654501	0.253293	-0.217727	-0.449787	-0.433257	-0.513544	-0.0880933	-0.151076
hsa-miR-4326	purple	m6	0.453659	0.293066	0.298306	0.913648	0.397087	0.753289	0.287264	-0.0989277	-0.416301	-0.467458	-0.594765	-0.218163	-0.40405
hsa-miR-433-3p	purple	m6	0.0362521	-0.115069	0.567743	0.423746	0.0793333	0.355408	0.245727	-0.191661	-0.361395	-0.154435	-0.302965	0.129164	0.125201
hsa-miR-4508	tan	m8	0.774546	0.322378	0.0927317	0.544499	0.27943	0.63743	0.397195	-0.273508	-0.499901	-0.459175	-0.557828	-0.146914	-0.512766
hsa-miR-450a-5p	yellow	m12	0.301195	0.676119	0.10362	-0.341771	-0.213977	-0.50522	-0.593458	0.246154	0.554599	-0.371226	-0.0289488	-0.643529	-0.478996
hsa-miR-450b-5p	yellow	m12	0.586329	0.928462	0.346475	-0.0694195	-0.404822	-0.340561	-0.558596	-0.114387	0.279377	-0.692275	-0.348822	-0.771862	-0.600531
hsa-miR-451a	red	m2	-0.51703	-0.239826	-0.213188	-0.145038	0.416492	-0.165277	-0.265623	0.850767	0.571442	0.205843	0.312222	-0.147958	0.0212118
hsa-miR-452-5p	turquoise	m1	0.235917	-0.350222	-0.183831	0.548464	0.47127	0.928134	0.762844	-0.339634	-0.783894	0.0257356	-0.478292	0.292039	-0.156878
hsa-miR-4520-2-3p	black	m3	-0.427862	-0.705624	-0.223896	-0.0865324	-0.0290608	0.0998811	0.586457	-0.275164	-0.33529	0.439185	0.254345	0.886056	0.709835
hsa-miR-4520-3p	black	m3	-0.433806	-0.695273	-0.211562	-0.118147	-0.0933219	0.0816019	0.600599	-0.31398	-0.392045	0.433497	0.152206	0.885421	0.664656
hsa-miR-4521	red	m2	-0.324316	0.101951	0.35689	0.0373511	0.27757	-0.240893	-0.478061	0.732687	0.711144	-0.125949	0.356124	-0.337467	0.181024
hsa-miR-454-3p	blue	m10	-0.182002	0.325334	0.106297	-0.242684	0.166763	-0.45694	-0.683736	0.772124	0.904929	-0.201175	0.352476	-0.573886	-0.0799564
hsa-miR-455-3p	tan	m8	0.894003	0.873808	0.298518	0.103002	-0.288613	0.00644336	-0.255255	-0.388918	-0.0914813	-0.684754	-0.463292	-0.643012	-0.658729
hsa-miR-455-5p	tan	m8	0.726621	0.625261	0.271489	0.180213	-0.546991	0.0707631	0.0264996	-0.779016	-0.463033	-0.557955	-0.590402	-0.242476	-0.395601
hsa-miR-4645-3p	turquoise	m1	0.621183	0.466163	0.163789	0.503776	0.326536	0.34872	-0.0736396	0.0733465	-0.0541245	-0.426526	-0.362937	-0.491218	-0.691753
hsa-miR-4677-3p	magenta	m5	0.051807	0.349737	0.605254	0.557458	0.189392	0.190596	-0.194241	0.356501	0.107966	-0.429606	-0.451443	-0.34914	-0.0356855
hsa-miR-4772-5p	red	m2	-0.364841	-0.114212	-0.177088	-0.0572818	0.60779	-0.106356	-0.262102	0.909755	0.67423	0.102617	0.422525	-0.192103	0.0573661
hsa-miR-483-3p	tan	m8	0.529665	0.220898	-0.284674	-0.144778	-0.0993298	0.16238	0.00871555	-0.455601	-0.325973	0.0691574	-0.216665	-0.241037	-0.446534
hsa-miR-483-5p	turquoise	m1	0.512224	-0.132807	-0.273845	0.294402	0.540184	0.855944	0.619618	-0.264557	-0.600536	-0.134381	-0.454401	-0.0178119	-0.480197
hsa-miR-484	red	m2	-0.230681	0.100554	0.192757	0.0579313	0.522119	-0.09777	-0.42939	0.893625	0.658341	-0.0709555	0.245766	-0.432667	-0.0391463
hsa-miR-485-3p	magenta	m5	0.349953	0.564084	0.838763	0.448509	-0.190606	0.122173	-0.213307	-0.192161	-0.0910643	-0.703065	-0.542875	-0.479268	-0.21488
hsa-miR-485-5p	turquoise	m1	0.440728	-0.229599	-0.174697	0.500671	0.465347	0.908326	0.783307	-0.408578	-0.753225	-0.134215	-0.461784	0.25577	-0.240167
hsa-miR-486-3p	red	m2	-0.386866	-0.168889	-0.0148387	0.245678	0.671628	0.076597	-0.241347	0.92797	0.509565	0.0846749	0.242004	-0.211411	0.037378
hsa-miR-486-5p	red	m2	-0.456124	-0.221217	-0.105101	0.0477536	0.650408	0.00120007	-0.210342	0.940281	0.531799	0.124509	0.271728	-0.157827	0.100347
hsa-miR-487a-3p	magenta	m5	0.196185	0.50768	0.892738	0.699716	-0.201543	0.148527	-0.280691	-0.130271	-0.0824154	-0.597844	-0.511222	-0.421273	-0.118406
hsa-miR-487a-5p	turquoise	m1	0.0856061	-0.428858	0.00246017	0.0455812	0.363757	0.473235	0.482197	-0.155369	-0.29231	0.167046	0.0629791	0.325635	0.242122
hsa-miR-487b-3p	magenta	m5	0.48763	0.482019	0.687944	0.397497	-0.0997701	0.108977	-0.236609	-0.223793	0.00573741	-0.535846	-0.167158	-0.392321	-0.141752
hsa-miR-491-5p	turquoise	m1	0.492061	-0.0908205	-0.163413	0.583737	0.64181	0.962881	0.603235	-0.16549	-0.587035	-0.202523	-0.502773	-0.0413466	-0.457479
hsa-miR-493-3p	purple	m6	0.525078	0.342237	0.610719	0.706028	0.0369847	0.588411	0.296793	-0.409724	-0.540135	-0.630399	-0.729962	-0.173996	-0.320413
hsa-miR-493-5p	yellow	m12	0.563903	0.836193	0.750908	0.20591	-0.468338	-0.139225	-0.416918	-0.339625	0.00733932	-0.788242	-0.521702	-0.661236	-0.443748
hsa-miR-494-3p	magenta	m5	-0.129943	0.122844	0.823071	0.234522	-0.159832	-0.0684849	-0.339999	0.0587337	0.189855	-0.187332	-0.0733033	-0.219769	0.294221
hsa-miR-495-3p	purple	m6	0.00145685	-0.112257	0.579437	0.624491	0.0473267	0.429379	0.338855	-0.287056	-0.379971	-0.220347	-0.2334	0.270856	0.30355
hsa-miR-497-5p	greenyellow	m7	-0.395206	-0.692025	-0.491282	-0.245223	-0.1179	-0.0686667	0.331985	-0.29217	-0.297271	0.830012	0.455155	0.739548	0.493973
hsa-miR-499a-5p	greenyellow	m7	-0.61922	-0.686779	-0.468886	-0.472883	0.0373125	-0.309029	0.222104	0.164967	0.181548	0.765022	0.699789	0.712209	0.568353
hsa-miR-500a-3p	turquoise	m1	0.0656175	-0.327115	-0.0125405	0.782069	0.697561	0.912696	0.624248	0.0542943	-0.505339	-0.0743216	-0.381558	0.227658	-0.0360399
hsa-miR-500a-5p	purple	m6	0.110668	0.356052	0.565971	0.864478	0.184072	0.349603	-0.214057	0.200618	-0.0259755	-0.452142	-0.403224	-0.40943	-0.15515
hsa-miR-500b-5p	purple	m6	0.100504	0.23493	0.402153	0.861719	0.34264	0.428969	-0.158453	0.252054	-0.0352163	-0.293719	-0.278029	-0.358734	-0.15438
hsa-miR-501-3p	turquoise	m1	0.334033	0.0445533	0.151655	0.751377	0.72748	0.858155	0.336957	0.211681	-0.289319	-0.3727	-0.500041	-0.236129	-0.349483
hsa-miR-501-5p	turquoise	m1	0.389795	0.043196	0.0939903	0.743331	0.621071	0.921282	0.445236	-0.025091	-0.434661	-0.360628	-0.555828	-0.17747	-0.387917
hsa-miR-5010-3p	turquoise	m1	0.0583995	-0.200405	-0.0736882	0.388166	0.599358	0.689562	0.426545	0.173772	-0.294899	-0.173172	-0.403945	0.00101096	-0.13513
hsa-miR-502-3p	turquoise	m1	-0.0485394	-0.440673	-0.126567	0.708967	0.623307	0.817828	0.690873	0.0106835	-0.528612	0.0653475	-0.274787	0.419632	0.072733
hsa-miR-502-5p	magenta	m5	0.00461586	0.366962	0.518099	0.336527	-0.13988	-0.144307	-0.488581	0.110567	0.181028	-0.296588	0.0317818	-0.411648	0.0338704
hsa-miR-503-5p	purple	m6	0.469182	0.459931	0.589968	0.880631	0.219024	0.609673	0.0477061	-0.0862365	-0.321107	-0.649778	-0.690331	-0.446778	-0.408771
hsa-miR-504-5p	greenyellow	m7	-0.418039	-0.581674	-0.440558	-0.0604865	0.463559	0.186571	0.110266	0.382137	0.0426058	0.643506	0.286011	0.208481	0.109429
hsa-miR-505-3p	green	m13	0.08143	-0.299638	-0.376614	0.283079	0.901227	0.646732	0.325192	0.420382	-0.00466003	0.152615	0.048503	-0.0394405	-0.247256
hsa-miR-506-3p	salmon	m9	-0.609859	-0.656404	-0.159956	-0.356034	-0.167278	-0.224324	0.198842	-0.108397	0.00122298	0.51733	0.460544	0.680317	0.838164
hsa-miR-508-3p	salmon	m9	-0.643465	-0.510567	0.0621169	-0.179178	-0.154497	-0.270401	0.0410384	0.0373815	0.182504	0.328786	0.529965	0.547588	0.915278
hsa-miR-509-3-5p	salmon	m9	-0.577853	-0.510035	0.0265601	-0.338581	-0.221936	-0.280124	0.0468389	-0.0713811	0.112573	0.412291	0.397201	0.541114	0.869683
hsa-miR-509-3p	salmon	m9	-0.530765	-0.556352	-0.0189341	-0.0950741	-0.151319	-0.0652795	0.311509	-0.194443	-0.16239	0.35777	0.331724	0.692839	0.836047
hsa-miR-509-5p	salmon	m9	-0.523136	-0.390648	0.0910666	-0.297734	-0.224267	-0.316732	-0.0594382	-0.00134963	0.182378	0.276063	0.42288	0.376378	0.761864
hsa-miR-511-3p	turquoise	m1	0.493619	0.122662	0.12292	0.817487	0.460421	0.896081	0.417998	-0.190818	-0.570319	-0.411493	-0.648937	-0.184993	-0.425905
hsa-miR-511-5p	pink	m4	0.0923674	-0.416544	-0.284893	0.15886	0.237976	0.633014	0.880183	-0.391438	-0.74375	0.0281466	-0.447054	0.552762	0.0316793
hsa-miR-512-3p	turquoise	m1	0.716165	0.1409	-0.117029	0.367873	0.502892	0.799571	0.427664	-0.209937	-0.49548	-0.327602	-0.519917	-0.260419	-0.626113
hsa-miR-514a-3p	black	m3	-0.405343	-0.579278	-0.264374	-0.298494	-0.231304	-0.0794067	0.501818	-0.348965	-0.332325	0.384855	0.139819	0.802101	0.607783
hsa-miR-514a-5p	salmon	m9	-0.43684	-0.436104	-0.0615993	-0.223903	-0.14114	-0.209624	0.0570029	-0.123707	0.0781356	0.385181	0.434886	0.484055	0.711296
hsa-miR-514b-3p	black	m3	-0.42534	-0.560294	-0.264841	-0.34086	-0.219445	-0.130658	0.382676	-0.28868	-0.270318	0.413625	0.204544	0.713579	0.627921
hsa-miR-516a-5p	tan	m8	0.866033	0.372151	-0.0788687	0.1911	0.265373	0.580082	0.285596	-0.314776	-0.430851	-0.429359	-0.5418	-0.367418	-0.70343
hsa-miR-516b-5p	turquoise	m1	0.630703	0.0123727	-0.196099	0.297869	0.531035	0.825119	0.520377	-0.220421	-0.527995	-0.25235	-0.491814	-0.1571	-0.553496
hsa-miR-517a-3p	tan	m8	0.897943	0.570181	0.0216614	0.0712495	-0.00652546	0.243438	0.0240771	-0.326401	-0.266865	-0.441737	-0.452534	-0.442317	-0.686619
hsa-miR-517b-3p	tan	m8	0.897943	0.570181	0.0216614	0.0712495	-0.00652546	0.243438	0.0240771	-0.326401	-0.266865	-0.441737	-0.452534	-0.442317	-0.686619
hsa-miR-532-3p	turquoise	m1	-0.0787883	-0.273535	0.100522	0.588291	0.537303	0.672999	0.454156	0.130631	-0.409323	0.0485478	-0.337759	0.208282	0.14193
hsa-miR-532-5p	salmon	m9	-0.524567	-0.429219	0.225417	0.428426	0.401463	0.302959	0.195304	0.401882	0.0461451	0.126074	0.0369562	0.323216	0.597866
hsa-miR-539-3p	magenta	m5	-0.0154756	0.51519	0.941419	0.241416	-0.359391	-0.290943	-0.563874	0.0574686	0.35673	-0.559602	-0.183023	-0.470943	0.10942
hsa-miR-539-5p	purple	m6	0.180785	0.0690537	0.616366	0.661506	0.0455974	0.444548	0.279334	-0.274695	-0.453299	-0.336898	-0.42099	0.0997567	0.107446
hsa-miR-542-3p	tan	m8	0.820368	0.482181	0.065786	0.46985	0.263482	0.627174	0.170769	-0.288831	-0.418405	-0.591172	-0.652442	-0.518771	-0.796961
hsa-miR-542-5p	turquoise	m1	0.620051	0.0805908	-0.222087	0.470406	0.452096	0.825729	0.492897	-0.275982	-0.582939	-0.333149	-0.581678	-0.184004	-0.63883
hsa-miR-543	magenta	m5	-0.338275	0.0226145	0.68246	0.00988647	-0.0781631	-0.202843	-0.313654	0.259858	0.389736	-0.111488	0.126659	-0.13498	0.348977
hsa-miR-548a-3p	grey	m0	0.206526	0.12193	-0.0716746	-0.348024	-0.239991	-0.180036	-0.0790873	-0.261708	0.1071	0.087432	0.212325	0.0422851	0.198569
hsa-miR-548ad-5p	red	m2	-0.493881	-0.219464	-0.169167	-0.107774	0.574613	-0.160798	-0.242263	0.949621	0.656397	0.164691	0.447084	-0.0967757	0.162274
hsa-miR-548ae-5p	red	m2	-0.50079	-0.22827	-0.19745	-0.13859	0.557644	-0.179115	-0.232346	0.937265	0.653285	0.171747	0.450803	-0.0788021	0.162197
hsa-miR-548ah-3p	greenyellow	m7	-0.6843	-0.73417	-0.355858	-0.539105	-0.128335	-0.346192	0.197087	0.0487076	0.0687336	0.773483	0.540852	0.697819	0.571811
hsa-miR-548ay-5p	red	m2	-0.467207	-0.174306	-0.18012	-0.129421	0.56647	-0.18791	-0.299652	0.949454	0.696349	0.15042	0.450543	-0.1514	0.135386
hsa-miR-548az-5p	black	m3	-0.343233	-0.534205	-0.334842	-0.153323	-0.0862238	0.0249949	0.604774	-0.22653	-0.290752	0.414626	0.118593	0.829536	0.421577
hsa-miR-548bc	purple	m6	-0.0506235	0.0995321	0.238234	0.634407	0.414859	0.348295	-0.0821217	0.445091	0.0648815	-0.332634	-0.230425	-0.263547	-0.060563
hsa-miR-548d-5p	red	m2	-0.478605	-0.174329	-0.174527	-0.123016	0.559066	-0.195444	-0.305043	0.951578	0.701433	0.148101	0.461578	-0.150593	0.142226
hsa-miR-548e-3p	red	m2	-0.0300837	0.13522	0.275587	0.563471	0.691495	0.380139	-0.16378	0.720934	0.349576	-0.335707	-0.190325	-0.447441	-0.218515
hsa-miR-548k	red	m2	-0.501807	-0.088602	0.264436	0.035724	0.334084	-0.133397	-0.383069	0.80368	0.6386	-0.00367342	0.161604	-0.259424	0.22305
hsa-miR-548o-3p	salmon	m9	-0.708089	-0.542518	0.0761635	-0.187698	-0.107062	-0.230354	0.178047	0.104151	0.0990098	0.408853	0.318476	0.643868	0.804805
hsa-miR-548p	greenyellow	m7	-0.70585	-0.72945	-0.328034	-0.53872	-0.118437	-0.356796	0.171785	0.083781	0.107006	0.756861	0.543706	0.676228	0.58109
hsa-miR-548u	purple	m6	-0.045695	0.0256348	0.382179	0.760384	0.404557	0.588153	0.102159	0.210507	-0.130083	-0.354081	-0.421432	-0.207131	-0.035785
hsa-miR-549a-3p	tan	m8	0.736846	0.488261	0.132173	0.505201	0.28502	0.605005	0.120678	-0.206345	-0.350115	-0.642756	-0.673366	-0.549386	-0.774235
hsa-miR-550a-3-5p	green	m13	-0.0689159	-0.235514	-0.150152	0.223351	0.882383	0.466448	0.231416	0.593466	0.111618	0.024818	-0.00934357	-0.0398667	-0.0895802
hsa-miR-550a-3p	red	m2	-0.18037	0.121423	0.111351	0.19757	0.489459	-0.0353164	-0.342257	0.827139	0.500939	-0.151051	0.0774193	-0.383993	-0.134696
hsa-miR-550a-5p	green	m13	-0.065983	-0.254774	-0.113692	0.309489	0.886734	0.540869	0.296209	0.539726	0.026875	0.0268829	-0.0633742	0.00778045	-0.0638626
hsa-miR-5683	black	m3	-0.421259	-0.538315	-0.439108	-0.121008	-0.0381465	-0.0188554	0.325274	-0.0567271	-0.24045	0.688526	0.318603	0.57326	0.225331
hsa-miR-574-3p	turquoise	m1	0.401976	-0.125287	-0.207525	0.177769	0.217846	0.48703	0.456863	-0.450563	-0.44772	0.0368504	0.0531622	0.213906	-0.08289
hsa-miR-574-5p	turquoise	m1	0.307981	-0.242262	-0.111497	0.588141	0.417183	0.910435	0.849919	-0.36455	-0.802274	-0.14912	-0.561778	0.346433	-0.180496
hsa-miR-576-3p	pink	m4	0.152852	-0.436021	-0.335482	0.403315	0.51681	0.862051	0.942007	-0.254868	-0.726227	0.0250302	-0.420415	0.4981	-0.100495
hsa-miR-576-5p	red	m2	-0.475286	0.0559164	0.159142	-0.0938266	0.287581	-0.354452	-0.564211	0.896677	0.821391	-0.0468769	0.36433	-0.356608	0.179537
hsa-miR-582-3p	turquoise	m1	0.156501	0.147906	0.222803	0.594876	0.535977	0.5071	0.225163	0.336569	-0.00793708	-0.495872	-0.404275	-0.191851	-0.307177
hsa-miR-582-5p	blue	m10	-0.160376	0.213465	-0.00400949	-0.319449	0.13655	-0.453796	-0.580272	0.667896	0.843027	-0.102882	0.368732	-0.463773	-0.123237
hsa-miR-584-5p	red	m2	-0.430771	-0.109345	0.205749	0.17064	0.546912	0.0488242	-0.198195	0.823597	0.503359	-0.116774	0.0897856	-0.198082	0.186629
hsa-miR-585-3p	greenyellow	m7	-0.33025	-0.475387	-0.354523	-0.00413234	0.0734839	0.0505814	0.170754	0.0501809	-0.254344	0.53473	0.233447	0.349873	0.186382
hsa-miR-589-5p	turquoise	m1	0.237302	-0.255547	-0.0807073	0.595148	0.50592	0.889269	0.841508	-0.220676	-0.680169	-0.181158	-0.568305	0.339143	-0.179186
hsa-miR-590-3p	blue	m10	-0.105157	0.488187	0.326168	-0.243144	-0.096339	-0.522718	-0.72959	0.513812	0.850549	-0.350377	0.181259	-0.621281	-0.0654269
hsa-miR-598-3p	red	m2	-0.290762	0.125916	0.153999	0.11746	0.373788	-0.0801426	-0.382426	0.745607	0.579489	-0.117668	0.188415	-0.354453	0.128747
hsa-miR-615-3p	pink	m4	0.300873	-0.134467	-0.059984	0.307682	0.218543	0.684182	0.71116	-0.391852	-0.746176	-0.0736343	-0.550375	0.269293	-0.185067
hsa-miR-618	red	m2	-0.260695	-0.090287	-0.184906	-0.288921	0.416214	-0.204474	-0.262198	0.778138	0.649214	0.0740531	0.273366	-0.227821	-0.0941016
hsa-miR-619-5p	tan	m8	0.793827	0.746295	0.32194	0.159418	-0.197354	0.0390122	-0.223106	-0.283135	-0.0597705	-0.666721	-0.366084	-0.563903	-0.471638
hsa-miR-624-5p	red	m2	-0.524023	-0.0432784	0.0582986	-0.104238	0.327302	-0.294718	-0.424242	0.896432	0.730388	0.0489105	0.283809	-0.236792	0.168765
hsa-miR-625-3p	yellow	m12	0.490189	0.784914	0.412024	0.215375	-0.030632	-0.0774383	-0.447769	0.135189	0.358659	-0.620817	-0.174021	-0.676215	-0.373289
hsa-miR-625-5p	turquoise	m1	0.384168	0.266891	0.112229	0.604099	0.666857	0.523327	-0.0715666	0.386169	0.0986224	-0.378061	-0.22866	-0.508948	-0.480592
hsa-miR-627-5p	turquoise	m1	0.382807	-0.282522	-0.291291	0.412427	0.565054	0.918922	0.687756	-0.245804	-0.631992	-0.0200082	-0.382461	0.144015	-0.275494
hsa-miR-628-5p	red	m2	-0.602652	-0.377326	-0.341473	-0.474209	0.250522	-0.422516	-0.309926	0.705465	0.688256	0.462228	0.614457	0.054582	0.267009
hsa-miR-629-3p	turquoise	m1	0.217827	0.288957	0.359539	0.358853	0.388736	0.261842	-0.168052	0.259754	0.178387	-0.456542	-0.0809969	-0.460074	-0.25882
hsa-miR-629-5p	turquoise	m1	0.27542	-0.2523	-0.149362	0.613593	0.748569	0.980592	0.710353	-0.00451387	-0.549338	-0.147387	-0.453747	0.132371	-0.253389
hsa-miR-641	pink	m4	0.0995661	-0.289539	-0.192353	0.0120891	0.184517	0.438074	0.510426	-0.1627	-0.429964	-0.0665314	-0.253619	0.188987	-0.132194
hsa-miR-6499-5p	black	m3	-0.527666	-0.525919	-0.129013	-0.0985518	0.0376916	-0.0422596	0.422345	0.0781705	-0.119977	0.300731	0.244606	0.698435	0.639776
hsa-miR-6500-3p	greenyellow	m7	-0.367159	-0.442342	-0.183463	-0.083654	-0.206957	-0.0847932	0.103914	-0.213502	-0.259224	0.686936	0.158994	0.400107	0.175259
hsa-miR-6501-5p	pink	m4	0.217121	-0.379461	-0.378001	0.314528	0.647643	0.849026	0.889697	-0.0977407	-0.626555	-0.00808141	-0.418878	0.364369	-0.244233
hsa-miR-6503-3p	turquoise	m1	0.0616075	-0.343608	-0.248039	0.379944	0.854998	0.756305	0.538151	0.320857	-0.164115	0.00162579	-0.169173	0.117089	-0.145008
hsa-miR-6503-5p	turquoise	m1	0.293242	-0.257566	-0.171247	0.617543	0.735697	0.944082	0.601992	-0.0291532	-0.484133	-0.0956635	-0.345848	0.0679961	-0.271381
hsa-miR-651-5p	magenta	m5	-0.237684	0.363559	0.703247	0.16404	-0.175562	-0.302774	-0.602353	0.397711	0.528515	-0.386633	-0.117429	-0.457292	0.176218
hsa-miR-6510-3p	black	m3	-0.445237	-0.65005	-0.363692	-0.266806	-0.120602	-0.0173176	0.618473	-0.265665	-0.361996	0.462334	0.0976262	0.890054	0.539035
hsa-miR-6511a-3p	green	m13	-0.33165	-0.479316	-0.420991	0.182179	0.669818	0.326364	0.389476	0.435283	0.0366746	0.372627	0.263519	0.404969	0.282776
hsa-miR-6511b-3p	black	m3	-0.448981	-0.493611	-0.211644	-0.167165	0.0118622	-0.0420794	0.261173	0.0510601	-0.0807749	0.467199	0.231272	0.538684	0.498814
hsa-miR-6513-5p	pink	m4	-0.0622793	-0.464146	-0.127581	0.456594	0.513199	0.705839	0.76521	-0.00340361	-0.501306	0.00540205	-0.263138	0.482943	0.0747356
hsa-miR-6516-3p	yellow	m12	0.654799	0.874582	0.228592	-0.050264	-0.46788	-0.306575	-0.440468	-0.30665	0.103553	-0.572546	-0.270396	-0.576677	-0.456495
hsa-miR-6516-5p	black	m3	-0.399557	-0.677632	-0.332285	-0.122315	0.0151264	0.1354	0.563707	-0.267113	-0.353338	0.446711	0.144999	0.783845	0.570536
hsa-miR-652-3p	green	m13	-0.0127283	-0.304651	-0.242776	0.47458	0.949745	0.690892	0.318513	0.540303	-0.0152683	0.0367286	-0.0118404	-0.0428725	-0.1748
hsa-miR-652-5p	yellow	m12	0.261761	0.75727	0.447776	-0.102992	-0.26117	-0.397464	-0.716321	0.195012	0.501035	-0.57495	-0.123949	-0.805117	-0.344854
hsa-miR-653-3p	greenyellow	m7	-0.403875	-0.534363	-0.520581	-0.624948	-0.092119	-0.354953	0.0165124	-0.0185774	0.199521	0.766947	0.592293	0.458881	0.419478
hsa-miR-653-5p	greenyellow	m7	-0.221409	-0.35752	-0.252349	-0.30731	0.0994296	-0.0265712	0.0255184	-0.00856353	0.143138	0.404964	0.231778	0.173826	0.262381
hsa-miR-654-3p	magenta	m5	0.0432864	0.396061	0.957341	0.577654	-0.19339	0.0432551	-0.292098	-0.0439603	0.0511725	-0.537302	-0.349492	-0.315952	0.109076
hsa-miR-654-5p	purple	m6	0.399191	0.0966945	0.452103	0.816005	0.274579	0.755176	0.443517	-0.298934	-0.5949	-0.424653	-0.60598	0.00681553	-0.169301
hsa-miR-655-3p	magenta	m5	0.331414	0.647624	0.827618	0.255331	-0.259413	-0.190788	-0.527817	-0.0507372	0.302411	-0.595068	-0.147413	-0.566891	-0.118283
hsa-miR-656-3p	magenta	m5	-0.28123	0.163628	0.594754	-0.285172	-0.265251	-0.532699	-0.54068	0.265597	0.653211	-0.139473	0.348942	-0.22009	0.415007
hsa-miR-659-5p	pink	m4	0.0274849	-0.509633	-0.464015	0.0349421	0.28669	0.579803	0.966009	-0.331353	-0.69897	0.152506	-0.301031	0.675104	0.0266732
hsa-miR-660-3p	green	m13	-0.251497	-0.555022	-0.356061	0.102621	0.632757	0.40976	0.238223	0.326212	-0.0278614	0.359843	0.256367	0.189549	0.21678
hsa-miR-660-5p	blue	m10	-0.328292	0.281862	0.538633	0.106315	-0.0838334	-0.44548	-0.761266	0.537684	0.749041	-0.169739	0.322143	-0.416868	0.359761
hsa-miR-664a-3p	blue	m10	0.0167045	0.410708	0.0612482	-0.490679	-0.203101	-0.661415	-0.717313	0.30203	0.809232	-0.103284	0.52275	-0.475067	-0.0161029
hsa-miR-664a-5p	pink	m4	-0.0240986	-0.630798	-0.522342	0.00992121	0.27861	0.562554	0.956657	-0.387692	-0.717829	0.298419	-0.173225	0.767129	0.146166
hsa-miR-664b-3p	grey	m0	0.0183905	0.170855	-0.124133	-0.243617	-0.110511	-0.405632	-0.379118	0.141604	0.38616	0.219937	0.41835	-0.084673	0.148229
hsa-miR-664b-5p	pink	m4	0.239254	-0.163714	-0.314803	0.199159	0.0930367	0.540458	0.770239	-0.489488	-0.671264	-0.171708	-0.403925	0.404961	-0.116908
hsa-miR-665	purple	m6	0.087278	0.0747349	0.633019	0.869244	0.207699	0.541439	0.23401	-0.0688218	-0.314752	-0.381024	-0.430835	0.00482669	0.0424234
hsa-miR-671-3p	turquoise	m1	0.455688	-0.105386	-0.0865872	0.549181	0.593651	0.961423	0.635148	-0.204102	-0.6122	-0.24725	-0.549473	-0.0199157	-0.401748
hsa-miR-671-5p	turquoise	m1	0.44188	-0.170499	-0.178903	0.566065	0.614666	0.978571	0.69685	-0.22481	-0.662258	-0.163921	-0.515296	0.0737149	-0.380366
hsa-miR-6716-3p	black	m3	-0.334256	-0.651078	-0.243202	0.139314	0.109745	0.217555	0.599062	-0.210374	-0.413524	0.515265	0.230699	0.862516	0.60317
hsa-miR-6724-5p	pink	m4	-0.241878	-0.530262	-0.297712	0.277046	0.21208	0.382702	0.773625	-0.160163	-0.488389	0.303946	-0.0618989	0.800331	0.281914
hsa-miR-6733-5p	black	m3	-0.381238	-0.597314	-0.144142	0.380887	0.408531	0.353347	0.487174	0.11226	-0.29475	0.402811	0.156541	0.647018	0.472161
hsa-miR-675-3p	purple	m6	0.0304739	0.00464854	0.327002	0.843186	0.211605	0.494457	0.164803	-0.0669667	-0.323175	-0.102802	-0.285242	0.0145542	-0.0999626
hsa-miR-676-3p	black	m3	-0.681163	-0.745131	-0.334939	-0.194709	0.270843	0.0255638	0.29436	0.286622	-0.00667707	0.660357	0.295082	0.589556	0.544424
hsa-miR-6842-3p	pink	m4	-0.364678	-0.457791	-0.307538	-0.0275341	0.481918	0.199405	0.513011	0.390639	-0.0428815	0.185588	0.00377591	0.507593	0.260517
hsa-miR-7-1-3p	blue	m10	-0.16797	0.450308	0.421449	0.0844678	0.0781793	-0.319352	-0.663315	0.654815	0.735461	-0.333648	0.0436896	-0.617355	-0.102201
hsa-miR-7-5p	red	m2	-0.185566	0.245685	0.530637	0.631749	0.391933	0.151306	-0.311386	0.641702	0.345554	-0.386173	-0.154811	-0.389816	0.0284304
hsa-miR-708-3p	pink	m4	0.275	-0.348487	-0.303141	0.224984	0.234647	0.724108	0.924601	-0.527242	-0.850735	-0.0138651	-0.507789	0.513785	-0.0983271
hsa-miR-708-5p	tan	m8	0.627622	0.230713	0.0250672	0.0204343	-0.154981	0.142256	0.0439582	-0.529981	-0.344026	-0.154908	-0.21258	-0.132941	-0.240798
hsa-miR-744-3p	turquoise	m1	0.00728324	-0.133988	-0.0662515	0.470045	0.00219771	0.385612	0.535312	-0.313673	-0.521132	0.00278824	-0.419214	0.423235	-0.0187804
hsa-miR-744-5p	pink	m4	-0.354621	-0.733926	-0.305294	0.052411	0.252907	0.382976	0.809561	-0.149161	-0.519854	0.426967	-0.0611651	0.863514	0.443688
hsa-miR-758-3p	magenta	m5	0.17641	0.396477	0.861136	0.724168	-0.195902	0.184898	-0.147773	-0.193772	-0.174015	-0.501235	-0.486275	-0.23186	-0.00412972
hsa-miR-766-3p	turquoise	m1	0.61303	0.23485	0.10073	0.801846	0.511673	0.856373	0.38024	-0.129459	-0.475482	-0.455437	-0.600164	-0.244057	-0.529972
hsa-miR-769-3p	turquoise	m1	0.201977	-0.26803	-0.124633	0.499332	0.431793	0.783695	0.574823	-0.206858	-0.623196	0.060257	-0.40088	0.230862	-0.00939808
hsa-miR-769-5p	turquoise	m1	0.124383	-0.405402	-0.192979	0.615484	0.439562	0.871758	0.812948	-0.284438	-0.76204	0.0729181	-0.417706	0.459818	0.00384916
hsa-miR-7704	tan	m8	0.81775	0.535367	0.160648	0.256634	-0.183836	0.276797	0.253721	-0.523709	-0.482839	-0.551223	-0.581919	-0.161815	-0.47989
hsa-miR-7706	pink	m4	0.203941	-0.414241	-0.36285	0.319833	0.564595	0.867275	0.920914	-0.220616	-0.702338	-0.00165384	-0.406625	0.423023	-0.142521
hsa-miR-7974	purple	m6	0.359298	0.237244	0.46322	0.893533	0.388815	0.677147	0.163048	0.0505283	-0.334393	-0.491238	-0.611179	-0.271299	-0.303929
hsa-miR-7976	red	m2	-0.424092	-0.172766	-0.0808899	-0.19262	0.545756	-0.155831	-0.234917	0.882005	0.62732	0.201442	0.32441	-0.131675	0.105538
hsa-miR-873-5p	greenyellow	m7	-0.4873	-0.39049	-0.423542	-0.343961	-0.114203	-0.245452	0.0246073	0.140141	-0.0239125	0.571716	0.200952	0.344758	0.333266
hsa-miR-874-3p	turquoise	m1	0.328073	-0.36626	-0.403711	0.336315	0.606355	0.907054	0.775968	-0.244627	-0.66988	0.0839702	-0.349824	0.244511	-0.292063
hsa-miR-874-5p	turquoise	m1	0.392674	-0.121607	-0.241702	0.375431	0.527708	0.799792	0.443867	-0.218073	-0.51505	-0.0247857	-0.353347	-0.0726583	-0.35796
hsa-miR-877-5p	turquoise	m1	0.360403	-0.00159649	0.000744349	0.634128	0.639373	0.89807	0.470652	0.00890716	-0.432957	-0.338509	-0.497293	-0.167346	-0.408128
hsa-miR-887-3p	turquoise	m1	0.469743	-0.100631	-0.152809	0.549371	0.612162	0.953624	0.608364	-0.192074	-0.594599	-0.224931	-0.505297	-0.043148	-0.441305
hsa-miR-889-3p	magenta	m5	0.0317583	0.481697	0.907033	0.149148	-0.400241	-0.265423	-0.478691	-0.00404689	0.270864	-0.557125	-0.257409	-0.446912	0.0632073
hsa-miR-9-3p	blue	m10	-0.335681	-0.0231842	-0.177813	-0.57955	-0.0592923	-0.612478	-0.431636	0.414789	0.704041	0.222326	0.559966	-0.0171999	0.372536
hsa-miR-9-5p	salmon	m9	-0.625035	-0.454717	-0.0342633	-0.144736	0.114683	-0.257328	-0.00810746	0.370947	0.42255	0.364348	0.543673	0.469446	0.74752
hsa-miR-92a-1-5p	green	m13	-0.317084	-0.523475	-0.385203	-0.0640789	0.696205	0.323747	0.35144	0.45341	0.153352	0.331721	0.353671	0.276523	0.178227
hsa-miR-92a-3p	red	m2	-0.504069	0.0139965	0.161021	-0.105669	0.299441	-0.392554	-0.578386	0.903332	0.880612	0.0187087	0.518134	-0.307392	0.25015
hsa-miR-92b-3p	magenta	m5	-0.0252298	0.527735	0.760559	0.347542	-0.0182764	-0.178689	-0.584475	0.451373	0.514932	-0.541925	-0.141435	-0.60402	-0.0734211
hsa-miR-92b-5p	purple	m6	0.174351	-0.083974	0.0745783	0.809348	0.730667	0.840049	0.449108	0.225946	-0.328232	-0.246282	-0.395704	-0.0283618	-0.246825
hsa-miR-93-3p	turquoise	m1	0.225262	-0.124875	-0.0413989	0.627237	0.822295	0.840864	0.347872	0.279163	-0.230913	-0.195503	-0.302066	-0.158406	-0.251
hsa-miR-93-5p	red	m2	-0.366532	-0.102474	0.089939	0.298439	0.68399	0.112759	-0.270084	0.92897	0.529075	-0.0130108	0.184976	-0.273896	0.0799726
hsa-miR-935	pink	m4	-0.0633875	-0.693833	-0.540152	-0.0295986	0.378349	0.577546	0.826477	-0.213372	-0.60767	0.454651	-0.0981952	0.624873	0.0580952
hsa-miR-941	turquoise	m1	0.213538	-0.122016	-0.231901	0.517487	0.814279	0.781023	0.4133	0.315214	-0.226755	-0.197674	-0.277424	-0.142266	-0.407868
hsa-miR-942-5p	red	m2	-0.393694	-0.29249	-0.00147443	0.246269	0.751498	0.274113	0.0613656	0.7968	0.339731	0.0211845	0.0480032	-0.019583	0.139009
hsa-miR-944	magenta	m5	0.0975512	0.65568	0.906112	0.326683	-0.417447	-0.246353	-0.542396	-0.0355993	0.257417	-0.647427	-0.279578	-0.515549	0.0470502
hsa-miR-95-3p	salmon	m9	-0.761109	-0.357182	0.240536	-0.266493	0.0294144	-0.420798	-0.352731	0.551295	0.61403	0.314798	0.587749	0.133619	0.70636
hsa-miR-95-5p	black	m3	-0.40738	-0.519923	-0.20734	-0.101354	0.0733494	-0.0836453	0.373081	0.111239	-0.144552	0.464774	0.234591	0.703658	0.504924
hsa-miR-96-5p	salmon	m9	-0.714097	-0.590613	-0.119766	-0.223212	-0.0958296	-0.252122	0.126646	0.148319	0.144316	0.510876	0.504458	0.646757	0.849197
hsa-miR-98-5p	purple	m6	0.150809	0.248885	0.246451	0.446353	-0.0919613	-0.00926439	-0.303676	-0.0781439	0.123608	-0.187259	0.17342	-0.192877	0.0425001
hsa-miR-9983-3p	salmon	m9	-0.408154	-0.394725	-0.197295	-0.0524507	0.0954936	-0.0961701	0.131848	0.133056	0.147036	0.414522	0.335372	0.476067	0.493287
hsa-miR-99a-3p	brown	m11	-0.413594	-0.406865	-0.255608	-0.310629	-0.162783	-0.353623	-0.168935	0.00674415	0.197033	0.590733	0.708016	0.314943	0.498653
hsa-miR-99a-5p	black	m3	-0.523279	-0.770801	-0.529182	-0.432795	-0.0989509	-0.113397	0.576168	-0.215561	-0.27544	0.705929	0.369516	0.947601	0.576202
hsa-miR-99b-3p	turquoise	m1	0.188846	-0.354985	-0.0679482	0.551166	0.459374	0.908005	0.80697	-0.295289	-0.785123	-0.0415895	-0.546103	0.346723	-0.0896383
hsa-miR-99b-5p	turquoise	m1	0.386494	-0.214655	-0.114977	0.512766	0.509227	0.932308	0.71604	-0.324439	-0.749799	-0.0946011	-0.555052	0.150807	-0.313888
