# Supplementary material for: Integrative small and long RNA omics analysis of human healing and nonhealing wounds discovers cooperating microRNAs as therapeutic targets
Source: eLife. 2022 Aug 12;11:e80322. doi: 10.7554/eLife.80322 (PMC9374442; doi:10.7554/eLife.80322)
Supplement: Figure 2—source data 4. [file elife-80322-fig2-data4.xlsx]

## Sheet: mRNA kMEs
Weighted gene co-expression network analysis of mRNAs in wound healing.
kME: module eigengene values
ID	GeneSymbol	moduleColor	moduleLabel	kME_M5	kME_M2	kME_M4	kME_M10	kME_M11	kME_M9	kME_M12	kME_M1	kME_M8	kME_M7	kME_M13	kME_M3	kME_M6
ENSG00000188976.11	NOC2L	magenta	M5	0.976436	0.331318	0.0660583	-0.377143	-0.243394	-0.783276	-0.440402	0.353725	0.330108	-0.658984	-0.782214	0.0630429	-0.440191
ENSG00000187961.14	KLHL17	red	M2	0.278516	0.774932	0.46771	0.536155	0.160697	-0.0623196	-0.119575	-0.621962	-0.417723	-0.497262	-0.0126636	-0.284367	-0.555852
ENSG00000187583.10	PLEKHN1	red	M2	0.415699	0.862437	0.575805	0.168717	-0.349089	-0.457575	-0.469194	-0.577224	-0.53671	-0.462982	-0.280903	-0.325368	-0.670444
ENSG00000188290.10	HES4	red	M2	0.29154	0.885596	0.125495	0.643021	0.218532	-0.0575325	-0.0296369	-0.788297	-0.414565	-0.389166	-0.341393	-0.760636	-0.822259
ENSG00000187608.10	ISG15	tan	M8	0.0675624	-0.19441	-0.474614	0.160216	0.644747	0.082072	0.353647	0.188472	0.417551	0.20988	-0.236511	-0.174108	-0.022492
ENSG00000188157.15	AGRN	red	M2	0.103236	0.78913	0.0552907	0.665965	0.279485	0.0776977	0.11315	-0.834973	-0.461871	-0.224985	-0.255074	-0.804277	-0.742062
ENSG00000237330.3	RNF223	red	M2	-0.120797	0.464369	0.0836691	0.270933	-0.195862	0.0959718	0.0249352	-0.587769	-0.476336	-0.0883504	-0.0534861	-0.510948	-0.373752
ENSG00000131591.17	C1orf159	red	M2	0.449906	0.821792	0.39083	0.461818	0.103099	-0.165294	-0.0239413	-0.556761	-0.364768	-0.540479	-0.192745	-0.330841	-0.635924
ENSG00000186891.14	TNFRSF18	red	M2	0.405287	0.878153	0.249765	0.332197	-0.0944123	-0.318834	-0.227108	-0.66304	-0.424258	-0.430724	-0.458331	-0.633278	-0.802411
ENSG00000186827.11	TNFRSF4	yellow	M12	-0.191341	0.0428358	-0.440688	0.593204	0.772527	0.571072	0.835303	-0.301407	0.101717	0.0807056	0.0406577	-0.421118	-0.118369
ENSG00000078808.17	SDF4	red	M2	0.532357	0.856371	0.0428709	0.390873	0.0717068	-0.344981	-0.228649	-0.593057	-0.252727	-0.49735	-0.65034	-0.759678	-0.908836
ENSG00000176022.7	B3GALT6	red	M2	0.625633	0.806308	-0.0146706	0.355525	0.132872	-0.355182	-0.153244	-0.486944	-0.174628	-0.524695	-0.708311	-0.704726	-0.888716
ENSG00000160087.20	UBE2J2	magenta	M5	0.952633	0.416347	0.0813944	-0.221886	-0.118998	-0.656703	-0.20709	0.246797	0.32062	-0.687647	-0.692393	0.0306805	-0.453246
ENSG00000162572.20	SCNN1D	salmon	M9	-0.460579	0.0320179	-0.188735	0.418458	0.197997	0.655969	0.358508	-0.419199	-0.227956	0.0442327	0.317874	-0.291463	0.0493595
ENSG00000131584.19	ACAP3	red	M2	0.341655	0.952584	0.452914	0.462204	-0.0879149	-0.274163	-0.281358	-0.768675	-0.560856	-0.447811	-0.265727	-0.557665	-0.795627
ENSG00000169972.12	PUSL1	red	M2	0.389806	0.717822	0.184126	0.28144	-0.029879	-0.295184	-0.0641922	-0.528147	-0.442003	-0.334068	-0.44151	-0.538702	-0.711056
ENSG00000127054.20	INTS11	red	M2	0.679764	0.947072	0.489599	0.361622	-0.0581182	-0.477295	-0.393562	-0.52045	-0.29324	-0.741255	-0.415404	-0.366095	-0.832052
ENSG00000224051.7	CPTP	red	M2	0.422462	0.937492	0.331922	0.399883	-0.0990725	-0.348041	-0.312176	-0.711925	-0.491415	-0.479481	-0.420756	-0.642688	-0.857708
ENSG00000107404.20	DVL1	red	M2	0.675827	0.898805	0.34039	0.203476	-0.213389	-0.540868	-0.48091	-0.4859	-0.354701	-0.640715	-0.578857	-0.490381	-0.853815
ENSG00000186815.12	TPCN1	blue	M10	-0.335765	0.454155	0.118348	0.970362	0.635704	0.59219	0.320813	-0.797388	-0.356136	-0.116961	0.399981	-0.489865	-0.335272
ENSG00000175756.13	AURKAIP1	magenta	M5	0.822338	0.565059	-0.0973635	-0.0442799	-0.0106087	-0.580618	-0.161049	-0.0376326	0.157624	-0.514477	-0.838364	-0.383476	-0.657285
ENSG00000221978.12	CCNL2	red	M2	0.135296	0.581637	0.429593	0.558982	0.246565	0.212726	0.188518	-0.521847	-0.300572	-0.497754	0.250646	-0.0753753	-0.298039
ENSG00000101557.15	USP14	turquoise	M1	0.257606	-0.690995	-0.216606	-0.85505	-0.294864	-0.341163	-0.0946486	0.990653	0.640395	0.133356	-0.160609	0.723353	0.593955
ENSG00000235098.8	ANKRD65	red	M2	0.239911	0.767112	0.0831213	0.60277	0.339619	-0.0797316	0.00793733	-0.716867	-0.383167	-0.234855	-0.344174	-0.73266	-0.768274
ENSG00000179403.12	VWA1	red	M2	0.28842	0.373306	-0.460884	0.39659	0.46097	0.106726	0.348476	-0.29943	0.06574	-0.200842	-0.511821	-0.658639	-0.507184
ENSG00000160072.19	ATAD3B	magenta	M5	0.783651	0.0963614	0.0467368	-0.364051	-0.153753	-0.521512	-0.324804	0.465344	0.260764	-0.440889	-0.482916	0.273119	-0.142567
ENSG00000197785.13	ATAD3A	magenta	M5	0.814856	-0.0318085	-0.233068	-0.535889	-0.133011	-0.683263	-0.295674	0.606988	0.511836	-0.308545	-0.788216	0.12893	-0.184312
ENSG00000160075.12	SSU72	magenta	M5	0.924769	0.15639	0.046513	-0.443263	-0.175032	-0.700378	-0.321085	0.525176	0.496137	-0.598201	-0.632932	0.27204	-0.218345
ENSG00000228594.4	FNDC10	magenta	M5	0.754565	0.333346	0.122725	-0.470892	-0.434146	-0.808126	-0.55623	0.194669	0.00874239	-0.408245	-0.761465	-0.0483542	-0.437407
ENSG00000197530.12	MIB2	red	M2	0.492125	0.954767	0.343642	0.399917	-0.0783795	-0.359079	-0.309953	-0.678236	-0.438207	-0.553361	-0.440858	-0.595632	-0.859887
ENSG00000248333.8	CDK11B	magenta	M5	0.907543	0.627111	0.314406	-0.00653132	-0.0825069	-0.662017	-0.398496	0.00215629	0.167939	-0.79767	-0.58011	-0.0395883	-0.601953
ENSG00000189339.11	SLC35E2B	red	M2	0.170454	0.813759	0.541107	0.678157	0.221625	-0.0970489	-0.245128	-0.786289	-0.545247	-0.430325	0.000687142	-0.437622	-0.709043
ENSG00000215790.7	SLC35E2A	red	M2	0.0163383	0.711468	0.34604	0.739814	0.269755	0.16991	0.205541	-0.766536	-0.403004	-0.34267	0.141837	-0.446005	-0.537169
ENSG00000008130.15	NADK	magenta	M5	0.790896	0.240418	-0.113508	-0.110093	0.137716	-0.488169	-0.160303	0.289523	0.618187	-0.652326	-0.62194	-0.00246378	-0.360466
ENSG00000173692.13	PSMD1	turquoise	M1	0.223526	-0.729833	-0.287089	-0.85383	-0.270778	-0.285669	-0.0551304	0.990278	0.66781	0.116045	-0.172634	0.691804	0.605568
ENSG00000067606.17	PRKCZ	red	M2	0.571257	0.860066	0.624638	0.0904206	-0.371904	-0.566555	-0.480124	-0.467705	-0.447479	-0.616379	-0.34547	-0.219381	-0.688084
ENSG00000162585.17	FAAP20	red	M2	0.498134	0.944133	0.20432	0.558672	0.143745	-0.256646	-0.197756	-0.701828	-0.346628	-0.549492	-0.47458	-0.703182	-0.914802
ENSG00000157933.10	SKI	red	M2	0.532185	0.938099	0.392677	0.359392	-0.157438	-0.463043	-0.482384	-0.632625	-0.397437	-0.591199	-0.464647	-0.570365	-0.890958
ENSG00000116151.14	MORN1	pink	M4	0.595524	0.835656	0.72274	0.0964456	-0.381725	-0.592487	-0.567269	-0.419079	-0.441984	-0.653577	-0.269868	-0.101434	-0.652835
ENSG00000166181.13	API5	turquoise	M1	0.172803	-0.739721	-0.215413	-0.8652	-0.301815	-0.286788	-0.0549594	0.988039	0.651663	0.152351	-0.0872087	0.755727	0.659782
ENSG00000157911.10	PEX10	magenta	M5	0.93283	0.701228	0.349833	-0.0498428	-0.219239	-0.782952	-0.513792	-0.0698247	-0.0171703	-0.72339	-0.680556	-0.155178	-0.720194
ENSG00000130762.15	ARHGEF16	red	M2	0.581017	0.849257	0.242885	0.203682	-0.172288	-0.425956	-0.208312	-0.491452	-0.299214	-0.567141	-0.539522	-0.503539	-0.771032
ENSG00000162591.16	MEGF6	red	M2	0.251285	0.93527	0.451207	0.524451	-0.0760222	-0.183358	-0.311093	-0.835116	-0.582831	-0.497051	-0.199491	-0.593043	-0.799215
ENSG00000158109.15	TPRG1L	pink	M4	0.433836	0.278029	0.78521	-0.337406	-0.62252	-0.714171	-0.725108	0.115877	-0.226877	-0.386249	-0.0201427	0.441294	-0.160506
ENSG00000116213.16	WRAP73	red	M2	0.487261	0.559418	0.269706	0.504714	0.444303	-0.0836908	-0.0365732	-0.284596	0.0578091	-0.685865	-0.12458	-0.116028	-0.480826
ENSG00000078900.15	TP73	red	M2	0.295712	0.825157	0.628801	0.22101	-0.297491	-0.389376	-0.381105	-0.609572	-0.60107	-0.350137	-0.131885	-0.290584	-0.600898
ENSG00000130764.10	LRRC47	red	M2	0.724604	0.906335	0.287636	0.235198	-0.119146	-0.569969	-0.40199	-0.466044	-0.255543	-0.657993	-0.649534	-0.523242	-0.89897
ENSG00000116198.13	CEP104	red	M2	0.71685	0.549277	0.521218	0.0237007	-0.185423	-0.512709	-0.471305	-0.0626758	-0.111534	-0.77804	-0.276586	0.111814	-0.476142
ENSG00000169598.15	DFFB	brown	M11	0.109891	0.169007	-0.25164	0.539647	0.720233	0.38199	0.695941	-0.200014	0.269032	-0.312534	-0.0230674	-0.23287	-0.192597
ENSG00000092199.17	HNRNPC	turquoise	M1	0.265742	-0.693943	-0.280675	-0.836173	-0.242342	-0.314726	-0.0186812	0.987765	0.7127	0.0885918	-0.202614	0.684418	0.573137
ENSG00000131697.18	NPHP4	red	M2	0.45862	0.926319	0.356554	0.468938	-0.046949	-0.234195	-0.188571	-0.677754	-0.425768	-0.607902	-0.322142	-0.538023	-0.80357
ENSG00000069424.15	KCNAB2	brown	M11	-0.144045	-0.0104034	-0.405078	0.603113	0.946189	0.519238	0.715605	-0.192091	0.34884	0.0542624	0.0823383	-0.289051	-0.0457196
ENSG00000100575.14	TIMM9	turquoise	M1	0.164759	-0.749173	-0.236883	-0.83999	-0.257247	-0.253081	-0.00431036	0.987463	0.651099	0.175512	-0.0714825	0.752493	0.671367
ENSG00000137055.15	PLAA	turquoise	M1	0.295216	-0.676879	-0.235641	-0.813606	-0.224429	-0.303233	-0.0555484	0.986928	0.674157	0.0455475	-0.167151	0.720468	0.575503
ENSG00000158292.7	GPR153	red	M2	0.340637	0.869208	0.313183	0.376914	-0.180165	-0.365531	-0.402804	-0.72303	-0.609151	-0.350312	-0.429609	-0.693658	-0.873336
ENSG00000180329.14	CCDC43	turquoise	M1	0.171336	-0.741167	-0.279982	-0.823744	-0.237246	-0.216933	0.0369722	0.986673	0.659835	0.204999	-0.0811689	0.726556	0.678945
ENSG00000069812.11	HES2	red	M2	0.196597	0.542373	0.132639	0.173347	-0.147306	-0.0569552	0.150765	-0.449156	-0.355901	-0.31002	-0.219494	-0.37015	-0.426208
ENSG00000187017.17	ESPN	red	M2	0.463452	0.905643	0.479306	0.231758	-0.268273	-0.478217	-0.457378	-0.617941	-0.491757	-0.496018	-0.397358	-0.467262	-0.786157
ENSG00000215788.10	TNFRSF25	red	M2	0.186376	0.831898	0.632503	0.444155	-0.107756	-0.126397	-0.12452	-0.721005	-0.61328	-0.396109	0.0556422	-0.274302	-0.554401
ENSG00000171680.21	PLEKHG5	red	M2	0.339571	0.918294	0.63677	0.343984	-0.257438	-0.339603	-0.426496	-0.700122	-0.618491	-0.477699	-0.149862	-0.361189	-0.697301
ENSG00000160131.13	VMA21	turquoise	M1	0.252046	-0.692655	-0.274262	-0.869165	-0.298924	-0.325759	-0.107423	0.986483	0.665984	0.112572	-0.193442	0.680303	0.58964
ENSG00000204859.13	ZBTB48	red	M2	0.577446	0.92727	0.364721	0.452542	0.103141	-0.33974	-0.257225	-0.60731	-0.241515	-0.741435	-0.421577	-0.48136	-0.846451
ENSG00000162413.16	KLHL21	red	M2	0.674691	0.868691	0.276513	0.185342	-0.168892	-0.488763	-0.339836	-0.457716	-0.26973	-0.656185	-0.588167	-0.481389	-0.815737
ENSG00000116273.6	PHF13	red	M2	-0.0636352	0.70402	0.363701	0.560907	0.00475282	0.0446874	-0.0588654	-0.847078	-0.69339	-0.17637	0.0190022	-0.593936	-0.618775
ENSG00000041988.15	THAP3	red	M2	0.564037	0.908887	0.318785	0.457152	0.0425336	-0.330913	-0.239289	-0.630276	-0.376507	-0.671377	-0.470158	-0.567154	-0.902668
ENSG00000007923.16	DNAJC11	magenta	M5	0.817052	-0.0340669	0.121776	-0.563027	-0.277066	-0.688863	-0.359737	0.668719	0.508892	-0.501956	-0.477437	0.493993	-0.0280336
ENSG00000171735.19	CAMTA1	black	M3	0.155124	-0.452349	0.238611	-0.613263	-0.355591	-0.219854	-0.0843153	0.720971	0.34921	-0.0746158	0.251994	0.880278	0.595954
ENSG00000136450.13	SRSF1	turquoise	M1	0.20827	-0.719818	-0.265634	-0.860501	-0.278818	-0.277861	-0.0603815	0.986349	0.659933	0.158491	-0.141406	0.713496	0.635986
ENSG00000049246.14	PER3	pink	M4	0.107533	0.617205	0.932684	0.169313	-0.355312	-0.335016	-0.418688	-0.46599	-0.587624	-0.227252	0.292484	0.142729	-0.279824
ENSG00000101367.9	MAPRE1	turquoise	M1	0.228817	-0.727276	-0.368017	-0.793684	-0.167439	-0.270576	-0.015336	0.985535	0.733685	0.168317	-0.215168	0.621723	0.577192
ENSG00000116285.13	ERRFI1	purple	M6	-0.386832	-0.747259	-0.208098	-0.575158	-0.269581	0.111798	-0.0556267	0.62068	0.231692	0.652387	0.312623	0.537988	0.782994
ENSG00000142599.19	RERE	red	M2	0.329259	0.894974	0.65068	0.555054	-0.00420184	-0.286214	-0.398302	-0.695546	-0.450941	-0.528014	-0.0363362	-0.337693	-0.710758
ENSG00000163636.10	PSMD6	turquoise	M1	0.282621	-0.660982	-0.181474	-0.867153	-0.311469	-0.351702	-0.0987097	0.985344	0.677392	0.0488769	-0.156346	0.752688	0.593635
ENSG00000114030.13	KPNA1	turquoise	M1	0.20943	-0.721481	-0.205658	-0.818708	-0.251023	-0.266393	-0.0786116	0.985317	0.677744	0.0999679	-0.0831495	0.765811	0.640798
ENSG00000180758.12	GPR157	red	M2	0.415251	0.816127	0.637031	0.0977039	-0.419165	-0.521229	-0.475805	-0.526806	-0.591261	-0.426946	-0.262772	-0.259556	-0.647637
ENSG00000049239.12	H6PD	red	M2	0.368356	0.952911	0.438643	0.620255	0.0922057	-0.231044	-0.328588	-0.790969	-0.487699	-0.560828	-0.260173	-0.595978	-0.878707
ENSG00000171621.14	SPSB1	pink	M4	0.41068	0.638792	0.661296	0.112318	-0.288222	-0.5925	-0.632244	-0.329709	-0.451468	-0.244601	-0.183061	-0.100927	-0.54471
ENSG00000166913.13	YWHAB	turquoise	M1	0.275338	-0.689605	-0.260981	-0.821184	-0.229503	-0.332441	-0.0461558	0.985206	0.696266	0.0811402	-0.194856	0.683083	0.558632
ENSG00000188807.13	TMEM201	magenta	M5	0.892181	0.720437	0.196861	0.0382213	-0.100812	-0.653081	-0.422132	-0.146193	-0.0329141	-0.679227	-0.735745	-0.302455	-0.756945
ENSG00000171608.15	PIK3CD	tan	M8	0.140562	-0.384757	-0.547112	-0.18149	0.377187	0.134202	0.434658	0.48976	0.922184	-0.0908109	-0.184787	0.167301	0.294305
ENSG00000171603.17	CLSTN1	red	M2	0.0895	0.833415	0.51579	0.455771	-0.215065	-0.222959	-0.396548	-0.830683	-0.770411	-0.214885	-0.100727	-0.573602	-0.725396
ENSG00000178585.15	CTNNBIP1	red	M2	0.332992	0.845738	0.707024	0.181709	-0.401452	-0.493648	-0.574741	-0.616104	-0.649877	-0.406269	-0.17581	-0.284507	-0.664212
ENSG00000162441.12	LZIC	magenta	M5	0.828949	0.204412	0.325218	-0.559246	-0.546678	-0.852945	-0.584676	0.441282	0.200794	-0.554234	-0.528611	0.342065	-0.233542
ENSG00000173614.14	NMNAT1	red	M2	0.164462	0.633558	0.561543	0.612159	0.272007	-0.0675903	-0.259509	-0.549	-0.344388	-0.393015	0.180773	-0.16022	-0.473513
ENSG00000162444.12	RBP7	red	M2	0.152274	0.169925	0.291965	0.266484	0.280542	-0.229531	-0.271519	-0.0240327	0.0309296	0.0752199	0.0873162	0.0819623	-0.139832
ENSG00000130939.19	UBE4B	pink	M4	0.0550525	0.15903	0.916145	-0.177651	-0.429593	-0.35766	-0.475935	0.0118759	-0.293034	-0.14686	0.457787	0.63137	0.147844
ENSG00000054523.17	KIF1B	pink	M4	-0.0296377	-0.022175	0.789644	-0.317476	-0.554534	-0.34486	-0.55102	0.135909	-0.275842	-0.051935	0.41832	0.651404	0.240377
ENSG00000196591.12	HDAC2	turquoise	M1	0.288844	-0.663355	-0.187036	-0.849386	-0.280401	-0.364232	-0.107595	0.984762	0.671451	0.074176	-0.169101	0.737986	0.575746
ENSG00000160049.12	DFFA	magenta	M5	0.828008	0.0293218	0.0606034	-0.452616	-0.185023	-0.635738	-0.311565	0.584264	0.493818	-0.569675	-0.528082	0.368527	-0.126318
ENSG00000142655.13	PEX14	red	M2	0.655385	0.940675	0.354015	0.326443	-0.0835567	-0.516758	-0.390574	-0.552377	-0.372854	-0.602821	-0.555476	-0.543507	-0.907355
ENSG00000130940.15	CASZ1	red	M2	0.40638	0.903784	0.681047	0.230145	-0.345058	-0.494705	-0.516999	-0.62319	-0.589874	-0.468255	-0.225538	-0.312195	-0.710817
ENSG00000120948.17	TARDBP	black	M3	0.172616	-0.590653	0.12541	-0.756592	-0.365362	-0.271775	-0.104481	0.8647	0.407823	0.0940751	0.149934	0.912295	0.666339
ENSG00000121579.13	NAA50	turquoise	M1	0.255347	-0.705762	-0.352819	-0.85469	-0.266524	-0.292885	-0.0365049	0.984555	0.69606	0.100858	-0.240378	0.628412	0.569589
ENSG00000171824.14	EXOSC10	black	M3	0.273877	-0.373914	0.372469	-0.616014	-0.364034	-0.402701	-0.358469	0.713322	0.339003	-0.0799063	0.172483	0.892617	0.487049
ENSG00000087302.9	RTRAF	turquoise	M1	0.108458	-0.781946	-0.229081	-0.841372	-0.274039	-0.232841	-0.03756	0.983913	0.615756	0.229514	-0.036037	0.75938	0.697506
ENSG00000213341.11	CHUK	turquoise	M1	0.204091	-0.735811	-0.300697	-0.789283	-0.171484	-0.197112	0.0654709	0.983742	0.751746	0.0787944	-0.108096	0.725794	0.647108
ENSG00000116661.11	FBXO2	red	M2	0.468088	0.908112	0.338583	0.279414	-0.200052	-0.424946	-0.372616	-0.639191	-0.462351	-0.485684	-0.475947	-0.589329	-0.833247
ENSG00000132879.14	FBXO44	red	M2	0.382768	0.962292	0.495061	0.430272	-0.126152	-0.308616	-0.293569	-0.743625	-0.54183	-0.520564	-0.262552	-0.512442	-0.795419
ENSG00000116663.11	FBXO6	grey	M0	0.163025	-0.174822	-0.170597	-0.152636	0.151974	-0.0126772	0.451525	0.259952	0.196125	-0.124833	-0.141408	0.143042	0.0804315
ENSG00000180957.17	PITPNB	turquoise	M1	0.299859	-0.674852	-0.310425	-0.824735	-0.240099	-0.306082	-0.0612668	0.983294	0.711522	0.0519267	-0.233929	0.654288	0.547673
ENSG00000136758.18	YME1L1	turquoise	M1	0.0744787	-0.813718	-0.303381	-0.846932	-0.274711	-0.182727	0.0327394	0.982966	0.626209	0.25313	-0.0520269	0.720217	0.711904
ENSG00000177000.12	MTHFR	magenta	M5	0.831663	0.770436	0.309935	0.265644	0.12856	-0.531633	-0.244973	-0.243874	0.0556098	-0.785241	-0.536841	-0.242726	-0.747123
ENSG00000011021.23	CLCN6	red	M2	0.444339	0.653809	0.610055	0.439675	0.11964	-0.208589	-0.283969	-0.348702	-0.0918446	-0.698576	0.0727922	0.0409525	-0.442843
ENSG00000116685.16	KIAA2013	red	M2	0.492087	0.908903	0.203787	0.432084	0.0524858	-0.352783	-0.2811	-0.6661	-0.38077	-0.472697	-0.540572	-0.704887	-0.9076
ENSG00000083444.17	PLOD1	salmon	M9	-0.668153	-0.268863	-0.575166	0.447214	0.540703	0.682549	0.502444	-0.30278	-0.15062	0.69049	0.194838	-0.509754	0.110498
ENSG00000116688.16	MFN2	magenta	M5	0.876384	0.666548	0.522144	-0.164447	-0.408092	-0.84151	-0.639215	-0.0531306	-0.128954	-0.722305	-0.570626	-0.0190245	-0.645631
ENSG00000116691.11	MIIP	magenta	M5	0.644724	0.786748	0.0187381	0.413264	0.244216	-0.266621	-0.0130414	-0.456084	-0.0850666	-0.661661	-0.612166	-0.588095	-0.826519
ENSG00000120949.15	TNFRSF8	tan	M8	0.425264	-0.145654	-0.39774	-0.128391	0.271364	-0.0660337	0.368989	0.4369	0.7906	-0.364428	-0.347503	0.123184	0.0418106
ENSG00000028137.19	TNFRSF1B	tan	M8	0.446706	-0.333397	-0.487503	-0.352485	0.272727	-0.20098	0.148008	0.659077	0.939748	-0.250367	-0.458103	0.223543	0.149416
ENSG00000048707.15	VPS13D	pink	M4	0.257567	0.258786	0.931384	-0.216195	-0.493052	-0.473884	-0.509707	0.0365114	-0.301108	-0.318924	0.298478	0.612239	0.0220094
ENSG00000162496.9	DHRS3	red	M2	0.721424	0.838223	0.365212	0.224657	-0.0871048	-0.640304	-0.541872	-0.385664	-0.224804	-0.608904	-0.580333	-0.426499	-0.856892
ENSG00000110958.16	PTGES3	turquoise	M1	0.288309	-0.680145	-0.289668	-0.824084	-0.248277	-0.297896	-0.0622498	0.982815	0.662326	0.0822226	-0.20194	0.669698	0.565191
ENSG00000116731.22	PRDM2	black	M3	-0.0143793	-0.598027	0.0141249	-0.516944	-0.15137	0.0863502	0.139632	0.721548	0.556961	-0.0429491	0.369703	0.849302	0.750722
ENSG00000189337.17	KAZN	magenta	M5	0.803142	0.714506	0.516755	-0.110733	-0.43323	-0.681479	-0.502204	-0.154477	-0.214536	-0.786531	-0.480684	-0.0430976	-0.611909
ENSG00000171729.14	TMEM51	yellow	M12	-0.187474	-0.350589	-0.623384	0.181232	0.646674	0.477092	0.842125	0.14303	0.417745	0.192353	-0.0208692	-0.136889	0.199768
ENSG00000142634.13	EFHD2	tan	M8	0.653909	-0.13123	-0.432983	-0.381135	0.158733	-0.388995	0.085873	0.597505	0.86104	-0.326582	-0.641665	0.110302	-0.0397155
ENSG00000132906.18	CASP9	tan	M8	0.236445	0.185332	-0.162952	0.292431	0.470415	0.0459152	0.293775	-0.0667056	0.493142	-0.422379	-0.199052	-0.159115	-0.227211
ENSG00000134001.13	EIF2S1	turquoise	M1	0.337849	-0.645603	-0.283671	-0.858963	-0.291314	-0.382727	-0.115967	0.982338	0.680346	0.0350726	-0.285568	0.638966	0.503848
ENSG00000088205.13	DDX18	turquoise	M1	0.368214	-0.618459	-0.216881	-0.806075	-0.226215	-0.375757	-0.0869179	0.981667	0.715371	0.00187357	-0.230287	0.700125	0.512097
ENSG00000116786.13	PLEKHM2	red	M2	0.70307	0.785476	0.0336683	0.408582	0.252996	-0.340251	-0.235209	-0.409469	-0.0362128	-0.66494	-0.636766	-0.584092	-0.848687
ENSG00000162461.8	SLC25A34	red	M2	0.152971	0.462082	0.426234	0.467796	0.196043	0.0970985	-0.137162	-0.408815	-0.254544	-0.573716	0.207371	-0.043292	-0.3137
ENSG00000162458.13	FBLIM1	salmon	M9	-0.36036	-0.269575	-0.700644	0.413937	0.655819	0.751256	0.715687	-0.0915475	0.162987	0.240521	0.102789	-0.349928	0.155186
ENSG00000065526.11	SPEN	magenta	M5	0.755986	0.220347	0.517539	-0.430072	-0.412238	-0.737891	-0.525215	0.395336	0.255428	-0.621326	-0.267901	0.519943	-0.12979
ENSG00000116809.11	ZBTB17	magenta	M5	0.753421	0.640239	-0.0350141	0.264628	0.281353	-0.282094	0.00192126	-0.195672	0.182841	-0.706814	-0.601341	-0.360449	-0.644668
ENSG00000173641.17	HSPB7	red	M2	0.413122	0.558597	0.521642	0.244712	-0.256879	-0.368227	-0.496364	-0.281421	-0.347246	-0.495493	-0.0762535	-0.0898913	-0.501748
ENSG00000142627.13	EPHA2	grey	M0	0.220089	0.137374	-0.0632124	-0.0574851	-0.0356994	-0.0423872	0.378799	-0.00115311	-0.0197558	-0.217237	-0.191227	-0.0600684	-0.115742
ENSG00000142632.17	ARHGEF19	red	M2	0.327958	0.902104	0.462457	0.37967	-0.158214	-0.247731	-0.242706	-0.718962	-0.531432	-0.493477	-0.231052	-0.477157	-0.721001
ENSG00000132881.12	CPLANE2	red	M2	0.399017	0.911529	0.385639	0.372523	-0.0885981	-0.350136	-0.345102	-0.698414	-0.491111	-0.456913	-0.377149	-0.5779	-0.81553
ENSG00000037637.11	FBXO42	pink	M4	0.195086	0.533917	0.918569	0.11784	-0.270804	-0.294576	-0.325123	-0.34191	-0.443666	-0.412295	0.290387	0.296318	-0.214017
ENSG00000131263.12	RLIM	turquoise	M1	0.086385	-0.797501	-0.294477	-0.840054	-0.258844	-0.181631	0.0229405	0.981643	0.680637	0.226065	-0.0422698	0.732816	0.718614
ENSG00000157191.20	NECAP2	red	M2	0.209161	0.441226	-0.0629443	0.607277	0.687771	0.00678986	0.294173	-0.406884	0.0332858	-0.0647961	-0.237259	-0.495338	-0.524887
ENSG00000165458.14	INPPL1	blue	M10	-0.16398	0.544672	0.0253041	0.969553	0.716757	0.41749	0.248077	-0.804224	-0.308539	-0.147352	0.120589	-0.655377	-0.538231
ENSG00000058453.17	CROCC	red	M2	0.360411	0.938713	0.34243	0.547273	0.0482002	-0.234871	-0.223504	-0.787343	-0.462039	-0.540875	-0.349152	-0.659917	-0.882808
ENSG00000117122.13	MFAP2	salmon	M9	-0.823096	-0.306126	-0.482963	0.534393	0.549421	0.89377	0.571215	-0.360626	-0.178867	0.584836	0.465134	-0.388932	0.248858
ENSG00000159363.18	ATP13A2	red	M2	0.516544	0.643734	-0.0817646	0.273096	0.113212	-0.27879	-0.107489	-0.381093	-0.20826	-0.298457	-0.612879	-0.620138	-0.710458
ENSG00000177889.10	UBE2N	turquoise	M1	0.215452	-0.7134	-0.263384	-0.881721	-0.337311	-0.293515	-0.108642	0.980347	0.633078	0.134186	-0.159745	0.697032	0.618384
ENSG00000117115.13	PADI2	red	M2	0.610807	0.707837	0.504575	0.0496111	-0.291645	-0.637859	-0.577341	-0.264523	-0.0400501	-0.618826	-0.372251	-0.145633	-0.611287
ENSG00000074964.17	ARHGEF10L	red	M2	0.46528	0.971275	0.41033	0.434509	-0.0971938	-0.342866	-0.354437	-0.710074	-0.465438	-0.578517	-0.37632	-0.568348	-0.855361
ENSG00000117154.12	IGSF21	brown	M11	-0.284605	0.0547845	-0.3295	0.733712	0.888909	0.641848	0.481571	-0.387488	0.10825	-0.0544713	0.185037	-0.386632	-0.117889
ENSG00000159423.17	ALDH4A1	pink	M4	0.196743	0.678431	0.669718	0.179047	-0.347392	-0.32669	-0.294736	-0.5215	-0.704406	-0.194496	-0.000719114	-0.146176	-0.458988
ENSG00000169991.11	IFFO2	red	M2	0.468207	0.584306	0.457155	-0.231226	-0.581703	-0.6044	-0.517989	-0.228352	-0.390117	-0.392013	-0.394398	-0.125289	-0.469205
ENSG00000127481.15	UBR4	pink	M4	0.285606	0.331096	0.65711	0.264461	0.0999902	-0.150103	-0.306484	-0.102071	-0.0360282	-0.512693	0.290385	0.367117	-0.126313
ENSG00000135387.21	CAPRIN1	turquoise	M1	0.249371	-0.696802	-0.263465	-0.84494	-0.2732	-0.340257	-0.12991	0.979849	0.645555	0.148377	-0.19493	0.669815	0.57035
ENSG00000171566.12	PLRG1	turquoise	M1	0.213763	-0.697378	-0.163276	-0.826147	-0.250252	-0.325654	-0.10812	0.979826	0.659916	0.144099	-0.0868099	0.769316	0.629042
ENSG00000162482.5	AKR7A3	red	M2	0.278616	0.840627	0.750415	0.436132	-0.13747	-0.283571	-0.249989	-0.660342	-0.53464	-0.500665	0.0363462	-0.198491	-0.612578
ENSG00000053371.12	AKR7A2	red	M2	-0.479371	0.270482	0.474982	0.493231	0.0367701	0.155401	-0.116362	-0.638657	-0.733099	0.315022	0.452991	-0.245794	-0.203749
ENSG00000040487.13	PQLC2	red	M2	0.280177	0.755807	0.264326	0.743899	0.46727	-0.0108227	-0.0635592	-0.675239	-0.327282	-0.431893	-0.142727	-0.519037	-0.716693
ENSG00000135316.17	SYNCRIP	turquoise	M1	0.314696	-0.654371	-0.227905	-0.856619	-0.308262	-0.348485	-0.099415	0.979401	0.64484	0.033078	-0.21074	0.700412	0.54799
ENSG00000173436.15	MICOS10	pink	M4	0.50552	0.346145	0.65664	-0.121174	-0.359195	-0.364415	-0.294149	0.0737196	-0.0510227	-0.667901	0.0945295	0.466042	-0.103174
ENSG00000158747.14	NBL1	red	M2	0.286899	0.819007	0.0789187	0.48928	0.0569009	-0.189479	-0.2957	-0.73699	-0.44701	-0.370323	-0.474221	-0.815291	-0.862557
ENSG00000162542.13	TMCO4	red	M2	0.470432	0.966425	0.359269	0.610669	0.121427	-0.239486	-0.237849	-0.727262	-0.406452	-0.588406	-0.316815	-0.604829	-0.879132
ENSG00000169914.6	OTUD3	black	M3	0.242224	-0.457369	0.244493	-0.690304	-0.35873	-0.284775	-0.0816749	0.764266	0.412611	-0.102686	0.160865	0.913749	0.574875
ENSG00000143155.13	TIPRL	turquoise	M1	0.097481	-0.792107	-0.302016	-0.856955	-0.274494	-0.222289	-0.0210482	0.979322	0.647724	0.238175	-0.086769	0.698339	0.684521
ENSG00000158786.4	PLA2G2F	red	M2	0.282554	0.528547	0.49952	0.0181588	-0.28884	-0.373697	-0.0894785	-0.317325	-0.452592	-0.235634	-0.119532	-0.0662579	-0.371128
ENSG00000162545.6	CAMK2N1	red	M2	0.351925	0.791984	0.0897339	0.492281	0.166359	-0.115327	-0.168219	-0.649215	-0.318857	-0.432507	-0.393302	-0.675784	-0.755377
ENSG00000090432.7	MUL1	red	M2	0.788459	0.756883	0.164633	0.233281	0.0139422	-0.530447	-0.305702	-0.270874	-0.0454971	-0.644813	-0.634805	-0.421118	-0.797163
ENSG00000158825.6	CDA	salmon	M9	-0.705357	-0.556433	-0.402989	-0.0588067	0.000975441	0.735917	0.441325	0.0768052	0.0456544	0.438672	0.506155	0.096415	0.628166
ENSG00000158828.8	PINK1	red	M2	0.338985	0.965873	0.44194	0.564904	-0.0280081	-0.258879	-0.369695	-0.810099	-0.551592	-0.512954	-0.25555	-0.62577	-0.867528
ENSG00000211460.12	TSN	turquoise	M1	0.250688	-0.681166	-0.203294	-0.855315	-0.31769	-0.334608	-0.0433366	0.978489	0.63822	0.0976406	-0.146297	0.727365	0.592174
ENSG00000128708.13	HAT1	turquoise	M1	0.107442	-0.780482	-0.34198	-0.851004	-0.266575	-0.212293	0.00722669	0.978431	0.65737	0.254709	-0.108665	0.670616	0.680761
ENSG00000127483.18	HP1BP3	black	M3	-0.376602	-0.612409	0.264617	-0.51215	-0.371679	0.0762469	-0.000322706	0.526471	0.0543786	0.49212	0.625907	0.834975	0.831635
ENSG00000174780.17	SRP72	turquoise	M1	0.194615	-0.733129	-0.306285	-0.834362	-0.240307	-0.267417	-0.0503615	0.978416	0.676055	0.180796	-0.153452	0.671973	0.622293
ENSG00000117298.16	ECE1	magenta	M5	0.757679	0.436286	0.0492922	0.0500699	0.00997334	-0.498923	-0.400191	0.0762369	0.268676	-0.563963	-0.54685	-0.145105	-0.5035
ENSG00000142794.18	NBPF3	red	M2	-0.0214782	0.461161	0.399243	0.492233	0.0864373	0.0217291	-0.121834	-0.529584	-0.322172	-0.326487	0.152104	-0.235002	-0.405388
ENSG00000147274.14	RBMX	turquoise	M1	0.26924	-0.667725	-0.151202	-0.849047	-0.29916	-0.380583	-0.136678	0.977934	0.636444	0.0924426	-0.142022	0.751754	0.577379
ENSG00000076864.19	RAP1GAP	red	M2	0.449258	0.865071	0.576924	0.210151	-0.369776	-0.508131	-0.575618	-0.574871	-0.532629	-0.496454	-0.292337	-0.380099	-0.741118
ENSG00000090686.15	USP48	purple	M6	-0.470476	-0.488972	0.170511	-0.186553	-0.059331	0.426434	0.483125	0.295349	0.129737	0.288229	0.758105	0.696067	0.786017
ENSG00000160050.14	CCDC28B	blue	M10	-0.207205	0.527422	0.0554263	0.958014	0.660743	0.494581	0.381235	-0.809183	-0.335979	-0.123227	0.221878	-0.600643	-0.463113
ENSG00000142798.20	HSPG2	red	M2	-0.0378709	0.700722	0.150362	0.904046	0.428749	0.196681	-0.0310107	-0.865866	-0.471049	-0.221591	-0.0121738	-0.741853	-0.716559
ENSG00000061794.13	MRPS35	turquoise	M1	0.362083	-0.614888	-0.186913	-0.859033	-0.304257	-0.435833	-0.166876	0.977741	0.648688	0.0379835	-0.252545	0.691022	0.498184
ENSG00000162552.15	WNT4	red	M2	0.334587	0.914896	0.616455	0.319929	-0.264939	-0.405602	-0.443131	-0.69471	-0.600941	-0.402245	-0.204935	-0.401547	-0.722478
ENSG00000184677.18	ZBTB40	red	M2	0.150497	0.423764	0.444404	0.575082	0.36522	0.18979	0.129963	-0.360281	-0.123994	-0.52861	0.317912	0.0744841	-0.227635
ENSG00000173372.17	C1QA	brown	M11	-0.315734	0.0711769	-0.266572	0.736387	0.883147	0.512356	0.411409	-0.414775	-0.0149118	0.216164	0.162582	-0.453716	-0.172611
ENSG00000159189.12	C1QC	brown	M11	-0.254759	0.0899585	-0.314881	0.737302	0.919272	0.484854	0.410706	-0.399201	0.0394696	0.168013	0.0845457	-0.483672	-0.212553
ENSG00000173369.16	C1QB	brown	M11	-0.313278	-0.0425733	-0.363635	0.644267	0.905215	0.511734	0.441886	-0.288737	0.0884711	0.287762	0.130848	-0.395357	-0.0793121
ENSG00000133216.16	EPHB2	salmon	M9	-0.474594	-0.184484	-0.368562	0.610124	0.700561	0.708667	0.446611	-0.200241	0.185374	0.20326	0.402462	-0.209792	0.170873
ENSG00000136381.13	IREB2	turquoise	M1	0.0755547	-0.793635	-0.258855	-0.82829	-0.243808	-0.182663	0.0198263	0.977657	0.685075	0.227406	-0.00723626	0.758647	0.732909
ENSG00000048544.6	MRPS10	turquoise	M1	0.186166	-0.73259	-0.320919	-0.849127	-0.271827	-0.289881	-0.0881255	0.977564	0.652422	0.218041	-0.180644	0.645393	0.609345
ENSG00000196504.16	PRPF40A	turquoise	M1	0.159181	-0.729166	-0.228132	-0.83596	-0.246937	-0.228453	0.0537701	0.977392	0.69869	0.152331	-0.0495925	0.769959	0.695203
ENSG00000198791.12	CNOT7	turquoise	M1	0.148892	-0.732312	-0.146529	-0.854794	-0.305485	-0.258048	-0.042309	0.97696	0.626773	0.169668	-0.00122952	0.816679	0.706707
ENSG00000197622.13	CDC42SE1	turquoise	M1	0.204443	-0.731838	-0.33494	-0.798347	-0.153945	-0.191249	0.0779609	0.976867	0.759393	0.107615	-0.134237	0.694054	0.644607
ENSG00000011009.11	LYPLA2	magenta	M5	0.892169	0.137173	-0.0863018	-0.379171	-0.057945	-0.688828	-0.255098	0.480891	0.46456	-0.520718	-0.742659	0.11633	-0.308226
ENSG00000150776.18	NKAPD1	turquoise	M1	0.283011	-0.655988	-0.165194	-0.840166	-0.282924	-0.352104	-0.10178	0.976741	0.683876	0.024685	-0.144088	0.758185	0.581457
ENSG00000117305.15	HMGCL	red	M2	0.0830898	0.724625	0.720607	0.634413	0.110472	-0.103456	-0.239852	-0.71078	-0.595786	-0.343621	0.223824	-0.221739	-0.557386
ENSG00000179163.11	FUCA1	brown	M11	-0.426466	0.121815	-0.134762	0.659091	0.622849	0.51101	0.517387	-0.505989	-0.221105	0.336694	0.282566	-0.447437	-0.122977
ENSG00000047315.16	POLR2B	turquoise	M1	0.173526	-0.730576	-0.141332	-0.831435	-0.278137	-0.287564	-0.0454044	0.976483	0.63573	0.126782	-0.0328286	0.802306	0.659109
ENSG00000165119.21	HNRNPK	turquoise	M1	0.144871	-0.748089	-0.245008	-0.847173	-0.28594	-0.28945	-0.115476	0.97646	0.640915	0.236219	-0.0993849	0.708227	0.649747
ENSG00000170606.15	HSPA4	turquoise	M1	0.379036	-0.615602	-0.252589	-0.795019	-0.208298	-0.365673	-0.0626765	0.975968	0.718968	-0.019684	-0.259023	0.666502	0.491037
ENSG00000142677.4	IL22RA1	pink	M4	0.498879	0.741391	0.776206	-0.0504767	-0.524119	-0.671081	-0.678163	-0.360884	-0.493363	-0.49085	-0.232927	-0.0284952	-0.561287
ENSG00000185436.12	IFNLR1	red	M2	0.496662	0.77203	0.634015	0.0980005	-0.271317	-0.530871	-0.462572	-0.446452	-0.459888	-0.535029	-0.285518	-0.166375	-0.631148
ENSG00000158055.15	GRHL3	pink	M4	-0.126701	0.420205	0.616556	0.0146559	-0.515407	-0.0513773	-0.254692	-0.447981	-0.663096	-0.0798641	0.299694	0.0406838	-0.0886632
ENSG00000001461.17	NIPAL3	pink	M4	0.115802	0.631752	0.936854	0.250492	-0.342044	-0.311614	-0.446015	-0.501441	-0.626198	-0.27891	0.309471	0.0991792	-0.339147
ENSG00000117602.12	RCAN3	pink	M4	-0.114978	-0.0493781	0.739951	-0.385787	-0.568859	-0.28668	-0.248984	0.122481	-0.337157	0.165166	0.459563	0.651041	0.345281
ENSG00000136522.13	MRPL47	turquoise	M1	0.167519	-0.759879	-0.3685	-0.824702	-0.210261	-0.236683	0.0539919	0.975696	0.644559	0.255171	-0.183527	0.631487	0.618571
ENSG00000186432.9	KPNA4	turquoise	M1	0.254887	-0.681287	-0.219191	-0.82313	-0.273335	-0.270014	-0.0714939	0.975695	0.714441	0.00238029	-0.116918	0.744947	0.611964
ENSG00000020633.18	RUNX3	red	M2	0.236394	0.644745	0.207253	0.331772	0.0842272	-0.0264492	0.208668	-0.518724	-0.217869	-0.308143	-0.143078	-0.357458	-0.447959
ENSG00000117614.10	SYF2	black	M3	0.0733052	-0.561431	0.038155	-0.603307	-0.169128	-0.189131	0.0213088	0.766238	0.606841	0.0498374	0.183513	0.796535	0.639167
ENSG00000117616.18	RSRP1	red	M2	-0.0951813	0.333277	0.547158	0.390656	0.182918	0.218332	0.125191	-0.363532	-0.173087	-0.286347	0.496538	0.217569	0.0061962
ENSG00000137574.10	TGS1	turquoise	M1	0.295438	-0.661122	-0.217377	-0.834266	-0.281661	-0.30009	-0.0271223	0.975428	0.668793	-0.00392162	-0.165948	0.731958	0.574813
ENSG00000204178.11	MACO1	purple	M6	-0.400167	-0.90354	-0.299353	-0.636168	-0.222905	0.23778	0.176323	0.742844	0.387992	0.51961	0.37512	0.661027	0.914394
ENSG00000157978.11	LDLRAP1	red	M2	0.338856	0.843454	0.52705	0.339371	-0.183423	-0.278292	-0.128471	-0.611205	-0.508836	-0.416351	-0.130395	-0.329647	-0.613625
ENSG00000117643.14	MAN1C1	red	M2	0.352749	0.873896	0.392997	0.567818	0.149787	-0.255059	-0.250943	-0.716679	-0.378907	-0.506386	-0.251797	-0.559578	-0.8169
ENSG00000162430.17	SELENON	greenyellow	M7	-0.328547	-0.213445	-0.431675	0.361062	0.592287	0.317795	0.237695	-0.0597541	0.142913	0.548244	0.0824694	-0.311501	0.0659044
ENSG00000117640.18	MTFR1L	red	M2	0.60624	0.778619	0.593622	0.382403	-0.00780079	-0.393612	-0.366902	-0.381741	-0.210464	-0.711975	-0.157032	-0.114297	-0.640069
ENSG00000182749.5	PAQR7	pink	M4	0.183268	0.672636	0.906621	0.136939	-0.434142	-0.471383	-0.631186	-0.502074	-0.627903	-0.289553	0.10793	0.00867986	-0.444599
ENSG00000117632.23	STMN1	greenyellow	M7	-0.667097	-0.294638	-0.241121	0.274021	0.376157	0.45406	0.343996	-0.176409	-0.22407	0.887825	0.379452	-0.203781	0.271602
ENSG00000158006.14	PAFAH2	pink	M4	0.406662	0.713915	0.842516	0.0979691	-0.385988	-0.559313	-0.629157	-0.389351	-0.453915	-0.530312	-0.0358517	0.041618	-0.501952
ENSG00000175087.10	PDIK1L	black	M3	0.146584	-0.369925	0.450327	-0.654249	-0.456691	-0.410974	-0.209844	0.644803	0.233066	0.0213908	0.251477	0.901224	0.523887
ENSG00000197245.6	FAM110D	red	M2	0.744601	0.800884	0.196491	0.264734	0.0687824	-0.497634	-0.34294	-0.335084	-0.0572346	-0.599616	-0.587225	-0.433913	-0.779084
ENSG00000142684.9	ZNF593	magenta	M5	0.778718	-0.0186586	-0.279305	-0.527492	-0.174519	-0.556258	-0.0435802	0.558318	0.466055	-0.381249	-0.755076	0.107413	-0.161699
ENSG00000142675.18	CNKSR1	red	M2	0.667669	0.704591	0.466849	-0.0753713	-0.382003	-0.581596	-0.326872	-0.229275	-0.27483	-0.611694	-0.429265	-0.103052	-0.560267
ENSG00000130695.15	CEP85	black	M3	0.339776	0.0095905	0.568223	-0.411787	-0.439363	-0.43691	-0.427061	0.292181	-0.138529	-0.240203	0.0719289	0.589865	0.107425
ENSG00000114503.11	NCBP2	turquoise	M1	0.323678	-0.658984	-0.310238	-0.762075	-0.173982	-0.262789	0.00318495	0.975407	0.718555	0.0184569	-0.206667	0.659601	0.53966
ENSG00000158062.20	UBXN11	red	M2	0.636804	0.617971	-0.0170384	0.396234	0.462535	-0.308306	-0.140113	-0.263325	0.16839	-0.503563	-0.56674	-0.442224	-0.691567
ENSG00000169442.9	CD52	brown	M11	-0.297656	-0.475185	-0.618746	0.239417	0.822842	0.530016	0.654415	0.207638	0.576541	0.334936	0.117103	-0.0353069	0.329247
ENSG00000176092.15	CRYBG2	red	M2	0.421851	0.747224	0.336284	0.0873524	-0.329831	-0.36234	-0.256033	-0.486719	-0.445021	-0.485748	-0.393412	-0.383065	-0.627291
ENSG00000117682.17	DHDDS	black	M3	0.522842	0.164951	0.616908	-0.206358	-0.267196	-0.600303	-0.539895	0.275097	-0.00773899	-0.367437	-0.0194739	0.505018	-0.0987017
ENSG00000198830.11	HMGN2	greenyellow	M7	-0.465486	-0.684224	-0.293219	-0.319249	0.080778	0.144797	0.206557	0.447498	0.192635	0.883882	0.261482	0.288747	0.619548
ENSG00000117713.20	ARID1A	black	M3	0.484493	0.127818	0.435131	-0.278505	-0.137825	-0.458713	-0.354102	0.296034	0.284821	-0.379046	-0.0577965	0.50052	0.0341655
ENSG00000060642.10	PIGV	pink	M4	-0.291307	0.419415	0.679218	0.443179	-0.0934556	0.150425	-0.333576	-0.62117	-0.616991	-0.149767	0.528531	-0.0229111	-0.170501
ENSG00000204160.12	ZDHHC18	tan	M8	0.515515	-0.181102	-0.204701	-0.44817	-0.036179	-0.352721	-0.0614177	0.593618	0.837036	-0.39214	-0.387449	0.335766	0.121487
ENSG00000183527.11	PSMG1	turquoise	M1	0.273312	-0.675321	-0.289637	-0.862147	-0.288201	-0.297239	-0.0320979	0.975379	0.66106	0.092886	-0.214883	0.67561	0.58221
ENSG00000142751.15	GPN2	magenta	M5	0.803407	0.60152	0.418049	-0.035537	-0.138075	-0.601846	-0.350257	-0.0671156	-0.0782972	-0.695497	-0.486679	0.0138697	-0.557418
ENSG00000198746.13	GPATCH3	red	M2	0.638922	0.954795	0.351177	0.377423	-0.0422358	-0.457224	-0.329816	-0.578556	-0.323814	-0.665581	-0.515754	-0.539106	-0.898096
ENSG00000090273.14	NUDC	magenta	M5	0.923192	0.219027	0.0709626	-0.438452	-0.257288	-0.794772	-0.416835	0.450851	0.407722	-0.570537	-0.719821	0.167682	-0.332078
ENSG00000175707.9	KDF1	pink	M4	0.536817	0.615897	0.795303	-0.21638	-0.601591	-0.732587	-0.659335	-0.186569	-0.439817	-0.473138	-0.21554	0.141594	-0.437355
ENSG00000253368.4	TRNP1	red	M2	0.509953	0.932657	0.425258	0.338333	-0.194184	-0.410916	-0.452046	-0.621674	-0.417743	-0.60635	-0.397521	-0.491085	-0.817084
ENSG00000158246.8	TENT5B	red	M2	0.399544	0.85443	0.536667	0.166694	-0.349323	-0.449663	-0.411742	-0.585128	-0.544279	-0.447965	-0.298821	-0.367276	-0.681858
ENSG00000090020.11	SLC9A1	magenta	M5	0.732002	0.462025	0.175404	0.0216045	-0.103029	-0.550286	-0.455381	0.0109216	0.123191	-0.613059	-0.505592	-0.132631	-0.542966
ENSG00000142784.16	WDTC1	red	M2	0.297474	0.929199	0.689962	0.534584	-0.0711184	-0.300714	-0.428889	-0.76028	-0.567288	-0.499199	-0.0463218	-0.38135	-0.745544
ENSG00000186501.14	TMEM222	magenta	M5	0.894022	0.625742	0.221813	-0.0238255	-0.0937548	-0.656257	-0.419372	-0.0543813	0.102663	-0.767273	-0.688802	-0.184571	-0.686968
ENSG00000142765.18	SYTL1	red	M2	0.304942	0.901811	0.545225	0.351553	-0.195963	-0.320562	-0.283142	-0.725709	-0.591911	-0.431868	-0.212573	-0.446947	-0.725803
ENSG00000142733.17	MAP3K6	red	M2	0.674345	0.85623	0.442712	0.0588197	-0.361446	-0.640851	-0.532811	-0.412012	-0.379377	-0.594463	-0.553692	-0.360948	-0.780099
ENSG00000174950.11	CD164L2	red	M2	0.24664	0.790411	0.421733	0.21232	-0.273885	-0.323617	-0.243862	-0.64236	-0.574488	-0.2864	-0.257849	-0.460816	-0.638202
ENSG00000158195.11	WASF2	red	M2	0.384461	0.785617	0.710577	0.428445	-0.092027	-0.414147	-0.521628	-0.539879	-0.467778	-0.487017	-0.0393746	-0.205591	-0.661816
ENSG00000126705.14	AHDC1	red	M2	0.348841	0.97741	0.537572	0.534004	-0.0704991	-0.278156	-0.3813	-0.802416	-0.59478	-0.542293	-0.213951	-0.535151	-0.839318
ENSG00000000938.13	FGR	tan	M8	0.298752	-0.471036	-0.476513	-0.384144	0.270836	-0.11775	0.130931	0.709929	0.939956	-0.145654	-0.31396	0.327671	0.297459
ENSG00000126709.15	IFI6	greenyellow	M7	-0.231981	-0.241084	-0.439056	0.155209	0.499419	0.175035	0.372086	0.0409908	0.102289	0.595822	-0.0785354	-0.264317	0.0619036
ENSG00000009780.15	FAM76A	pink	M4	-0.0684454	-0.115605	0.753019	-0.299191	-0.39662	-0.212838	-0.243167	0.223076	-0.169959	0.05285	0.565842	0.784592	0.416431
ENSG00000141030.13	COPS3	turquoise	M1	0.188161	-0.730434	-0.252952	-0.864558	-0.307397	-0.313453	-0.148573	0.97528	0.596596	0.194336	-0.146007	0.686047	0.612746
ENSG00000079246.16	XRCC5	turquoise	M1	0.325087	-0.639065	-0.2213	-0.812685	-0.235603	-0.399736	-0.109293	0.974976	0.713078	0.0589062	-0.232468	0.674814	0.507998
ENSG00000130775.16	THEMIS2	tan	M8	0.212497	-0.486192	-0.624143	-0.247643	0.46839	0.0624851	0.403653	0.635095	0.966963	-0.0558511	-0.27843	0.208807	0.309765
ENSG00000136045.12	PWP1	turquoise	M1	0.258446	-0.696814	-0.292385	-0.817292	-0.242854	-0.29264	-0.0412059	0.974966	0.620181	0.154008	-0.186111	0.657742	0.574054
ENSG00000158156.7	XKR8	tan	M8	0.517978	0.105581	-0.45284	0.0734622	0.42523	-0.176204	0.0931087	0.190181	0.670107	-0.404769	-0.589419	-0.244089	-0.299815
ENSG00000132313.15	MRPL35	turquoise	M1	0.130915	-0.75896	-0.281004	-0.844545	-0.270058	-0.238763	-0.0695575	0.974645	0.636187	0.23506	-0.100665	0.705863	0.66888
ENSG00000169403.12	PTAFR	tan	M8	0.275848	-0.575981	-0.556453	-0.52904	0.170771	-0.135488	0.179839	0.81412	0.952216	0.00375661	-0.342302	0.358743	0.392956
ENSG00000151465.14	CDC123	turquoise	M1	0.318962	-0.651252	-0.281592	-0.812926	-0.213371	-0.383469	-0.114102	0.974352	0.723584	0.0949718	-0.269416	0.628596	0.501097
ENSG00000204138.13	PHACTR4	pink	M4	0.300623	0.544091	0.765798	0.0278585	-0.326526	-0.305083	-0.354807	-0.228781	-0.2901	-0.426848	0.198425	0.289531	-0.147953
ENSG00000166012.16	TAF1D	turquoise	M1	0.244443	-0.708675	-0.311777	-0.847641	-0.261912	-0.264391	-0.0163409	0.974346	0.65463	0.0785296	-0.205893	0.673265	0.586752
ENSG00000180098.9	TRNAU1AP	black	M3	-0.233101	-0.574102	0.139443	-0.325004	-0.0367743	0.100613	0.226657	0.505653	0.140835	0.337306	0.472222	0.711994	0.649139
ENSG00000163754.17	GYG1	turquoise	M1	0.157924	-0.765645	-0.378499	-0.709514	-0.0522787	-0.160163	0.0637579	0.97376	0.794634	0.165301	-0.104707	0.654199	0.637304
ENSG00000188060.7	RAB42	brown	M11	-0.509417	-0.146548	-0.426662	0.641783	0.86183	0.652886	0.596652	-0.309971	0.035789	0.485446	0.262482	-0.403612	0.0477828
ENSG00000009844.16	VTA1	turquoise	M1	0.104936	-0.775217	-0.247801	-0.876334	-0.309469	-0.257902	-0.0793089	0.973573	0.613856	0.238911	-0.0749217	0.728923	0.686361
ENSG00000162385.11	MAGOH	turquoise	M1	0.29611	-0.659407	-0.281324	-0.822547	-0.212319	-0.328835	-0.042185	0.973431	0.722628	0.0687012	-0.225083	0.666653	0.551619
ENSG00000159023.21	EPB41	pink	M4	0.154196	0.158124	0.758749	-0.15508	-0.262381	-0.29399	-0.190376	0.075688	0.00438417	-0.249576	0.375838	0.631451	0.168557
ENSG00000253304.2	TMEM200B	red	M2	0.0375161	0.819082	0.222916	0.769417	0.170836	0.0700179	-0.155731	-0.901002	-0.571638	-0.276773	-0.0966554	-0.766513	-0.765535
ENSG00000116350.17	SRSF4	black	M3	0.0790841	-0.578169	-0.00607139	-0.529106	-0.0964541	0.0440966	0.250353	0.771233	0.598036	-0.00450317	0.304292	0.86439	0.736896
ENSG00000116353.15	MECR	red	M2	0.639563	0.581524	0.72803	-0.0147184	-0.322273	-0.685461	-0.660009	-0.106847	-0.230194	-0.606832	-0.192678	0.15801	-0.487337
ENSG00000060656.20	PTPRU	red	M2	0.352246	0.926233	0.508102	0.534358	-0.0630371	-0.197255	-0.339592	-0.756406	-0.513739	-0.628475	-0.156066	-0.484327	-0.782174
ENSG00000162511.8	LAPTM5	tan	M8	-0.0426843	-0.564969	-0.648235	-0.11558	0.592088	0.214282	0.366276	0.531422	0.859418	0.200018	-0.113674	0.141035	0.381182
ENSG00000102181.21	CD99L2	blue	M10	-0.149833	0.561251	0.0398469	0.95214	0.595798	0.388848	0.147433	-0.816887	-0.346048	-0.195464	0.108009	-0.692156	-0.579955
ENSG00000134644.15	PUM1	black	M3	0.17565	-0.308901	0.527777	-0.513109	-0.370602	-0.351839	-0.331068	0.581721	0.197774	-0.0984961	0.326402	0.904985	0.470072
ENSG00000183520.12	UTP11	turquoise	M1	0.213289	-0.725776	-0.380597	-0.826177	-0.214758	-0.270787	-0.0445423	0.973397	0.665844	0.184582	-0.232743	0.601361	0.576859
ENSG00000139343.10	SNRPF	turquoise	M1	0.346174	-0.622426	-0.278407	-0.846116	-0.26264	-0.392632	-0.0710376	0.973383	0.693464	0.0660676	-0.288289	0.634647	0.503159
ENSG00000121769.7	FABP3	red	M2	-0.437916	0.0696611	0.104628	0.480759	0.205067	0.248393	-0.11218	-0.404174	-0.405474	0.360867	0.352573	-0.275884	-0.0865413
ENSG00000168528.12	SERINC2	salmon	M9	-0.64043	-0.132609	-0.0657278	0.225654	0.0313493	0.58877	0.201434	-0.316495	-0.395638	0.470999	0.496768	-0.129329	0.277633
ENSG00000142910.16	TINAGL1	red	M2	0.319662	0.770766	0.422568	0.586644	0.056031	-0.190297	-0.300793	-0.589547	-0.384939	-0.425385	-0.0858862	-0.398738	-0.668433
ENSG00000088930.8	XRN2	turquoise	M1	0.265834	-0.692754	-0.395009	-0.758784	-0.109233	-0.237248	0.0522193	0.972983	0.829763	0.0739598	-0.224426	0.610869	0.564243
ENSG00000084636.18	COL16A1	red	M2	-0.135366	0.719161	0.121386	0.830957	0.317411	0.334811	0.221559	-0.942139	-0.550944	-0.242985	0.047606	-0.750376	-0.630979
ENSG00000134668.12	SPOCD1	greenyellow	M7	-0.157933	-0.470041	-0.559688	0.0774843	0.616994	0.327434	0.282846	0.327408	0.413827	0.455217	0.0217286	0.00112095	0.31089
ENSG00000134375.11	TIMM17A	turquoise	M1	0.206192	-0.744097	-0.439055	-0.788553	-0.146221	-0.220204	0.0743121	0.972982	0.702536	0.221225	-0.237051	0.571954	0.578991
ENSG00000120526.11	NUDCD1	turquoise	M1	0.345916	-0.628838	-0.23058	-0.829624	-0.259762	-0.371129	-0.124457	0.972819	0.679132	0.0202095	-0.243958	0.681174	0.513025
ENSG00000119705.9	SLIRP	turquoise	M1	0.260964	-0.695485	-0.352074	-0.811264	-0.207959	-0.275733	0.0421695	0.972809	0.663254	0.142464	-0.227689	0.620002	0.563552
ENSG00000174173.7	TRMT10C	turquoise	M1	0.338669	-0.62315	-0.176197	-0.854099	-0.313926	-0.398797	-0.133475	0.972729	0.63367	0.0524727	-0.214158	0.715323	0.529151
ENSG00000084652.16	TXLNA	magenta	M5	0.823929	0.00153076	0.00958691	-0.466876	-0.168029	-0.705372	-0.379755	0.591587	0.448826	-0.431665	-0.597014	0.288544	-0.17102
ENSG00000004399.12	PLXND1	blue	M10	-0.269039	0.35769	-0.175328	0.946772	0.838906	0.571594	0.435077	-0.67065	-0.136445	0.0283497	0.191415	-0.61236	-0.345351
ENSG00000160055.19	TMEM234	pink	M4	0.322181	0.580748	0.784439	0.301491	-0.0292134	-0.198579	-0.264426	-0.332598	-0.258976	-0.629639	0.223955	0.227238	-0.299613
ENSG00000067248.10	DHX29	turquoise	M1	0.136355	-0.737271	-0.136284	-0.849468	-0.325319	-0.248211	-0.0845698	0.972667	0.595346	0.171719	0.0117535	0.821246	0.710922
ENSG00000183615.6	FAM167B	brown	M11	-0.193035	0.0613453	-0.389003	0.49307	0.595477	0.54286	0.458024	-0.291412	0.113163	0.0460588	0.0656232	-0.384426	-0.0637719
ENSG00000182866.17	LCK	yellow	M12	-0.367184	-0.133628	-0.449052	0.434514	0.624455	0.623961	0.912382	-0.208998	0.0877915	0.32115	0.182245	-0.295942	0.104674
ENSG00000166200.15	COPS2	turquoise	M1	0.0723093	-0.791229	-0.250668	-0.86827	-0.327809	-0.206057	-0.033345	0.972578	0.618778	0.225395	-0.0291169	0.747145	0.719664
ENSG00000175130.7	MARCKSL1	tan	M8	0.0782874	-0.274721	-0.71855	0.175694	0.771584	0.220611	0.495226	0.253527	0.621879	0.180098	-0.31249	-0.229154	0.0306707
ENSG00000225828.1	FAM229A	red	M2	0.214998	0.917345	0.603318	0.604832	0.0294457	-0.111866	-0.15995	-0.798581	-0.537292	-0.461106	0.0390606	-0.388627	-0.657892
ENSG00000160058.18	BSDC1	red	M2	0.298738	0.911023	0.770343	0.47008	-0.152149	-0.300394	-0.427179	-0.716679	-0.616626	-0.495638	0.0255757	-0.263991	-0.667403
ENSG00000160062.15	ZBTB8A	red	M2	-0.14691	0.052706	0.285099	0.112368	-0.207578	0.0368513	-0.291917	-0.0858676	-0.291578	0.0896659	0.347869	0.127023	0.0902626
ENSG00000176261.15	ZBTB8OS	black	M3	0.0280064	-0.571624	0.0782601	-0.575958	-0.188567	-0.0104171	0.243308	0.724385	0.439846	0.0376079	0.310589	0.873415	0.71632
ENSG00000162521.19	RBBP4	black	M3	0.0557897	-0.713017	-0.0334963	-0.697995	-0.189765	-0.159258	0.0649027	0.902634	0.550024	0.242681	0.195685	0.870833	0.749684
ENSG00000162520.14	SYNC	greenyellow	M7	-0.8044	-0.378773	-0.0368479	0.0695883	-0.110766	0.455379	-0.0359965	-0.148066	-0.407502	0.755183	0.577132	0.0041248	0.426924
ENSG00000162522.11	KIAA1522	red	M2	0.46523	0.851646	0.6579	0.0983391	-0.439201	-0.602368	-0.583589	-0.52836	-0.58468	-0.442629	-0.313577	-0.28581	-0.704064
ENSG00000198492.16	YTHDF2	turquoise	M1	0.154665	-0.731712	-0.151486	-0.838016	-0.281735	-0.270377	-0.0686385	0.972554	0.587505	0.207467	-0.0194965	0.796929	0.68516
ENSG00000116497.18	S100PBP	green	M13	-0.697089	-0.277995	0.153199	0.352731	0.387079	0.71535	0.425395	-0.175401	-0.102062	0.317878	0.871749	0.294563	0.524983
ENSG00000121905.10	HPCA	red	M2	0.345938	0.186921	-0.177079	-0.246678	-0.216035	-0.262562	0.116737	0.0137592	-0.120794	-0.119264	-0.523388	-0.235555	-0.265886
ENSG00000121900.19	TMEM54	magenta	M5	0.398781	0.17443	-0.104422	-0.410666	-0.435108	-0.364752	-0.104912	0.0850268	-0.0646061	-0.304254	-0.552464	-0.137554	-0.237911
ENSG00000116514.16	RNF19B	tan	M8	0.264234	-0.57097	-0.547624	-0.606001	0.0316185	-0.1086	0.300989	0.800817	0.846689	-0.0543455	-0.327591	0.374282	0.41857
ENSG00000111142.14	METAP2	turquoise	M1	0.178068	-0.729668	-0.287783	-0.863535	-0.300389	-0.284568	0.0203923	0.972552	0.629523	0.182457	-0.154825	0.676857	0.620583
ENSG00000116525.14	TRIM62	red	M2	0.276593	0.676803	0.638015	0.12622	-0.317224	-0.351574	-0.152098	-0.477113	-0.512095	-0.372271	-0.0659613	-0.0995805	-0.460276
ENSG00000160094.15	ZNF362	red	M2	0.244448	0.953701	0.447445	0.62662	0.0510782	-0.192341	-0.246721	-0.858386	-0.563531	-0.400337	-0.179494	-0.635125	-0.829644
ENSG00000083520.15	DIS3	turquoise	M1	0.0908543	-0.772305	-0.194263	-0.834634	-0.281431	-0.199412	0.036151	0.972545	0.634094	0.214218	0.0209862	0.802908	0.736996
ENSG00000121903.14	ZSCAN20	red	M2	0.238206	0.484293	0.202967	0.415021	0.120232	-0.00155836	-0.256206	-0.413157	-0.171284	-0.630472	-0.118577	-0.269767	-0.488543
ENSG00000121904.17	CSMD2	salmon	M9	-0.658833	-0.3759	-0.459306	0.280433	0.339168	0.877075	0.563724	-0.142711	0.0349763	0.240026	0.446905	-0.116107	0.401033
ENSG00000101558.13	VAPA	turquoise	M1	0.246002	-0.661098	-0.134399	-0.853012	-0.307565	-0.304353	-0.0702505	0.972474	0.659298	0.0561942	-0.0659782	0.804425	0.648039
ENSG00000189280.3	GJB5	red	M2	0.615032	0.603321	0.628735	-0.262927	-0.641975	-0.778352	-0.758585	-0.148536	-0.402308	-0.508204	-0.407825	0.00679955	-0.526953
ENSG00000189433.7	GJB4	pink	M4	0.190677	0.672214	0.89931	0.138621	-0.414374	-0.467174	-0.596328	-0.499695	-0.640761	-0.270007	0.0988733	0.00725281	-0.444762
ENSG00000188910.8	GJB3	pink	M4	0.399062	0.494869	0.775425	-0.27297	-0.64547	-0.668875	-0.660299	-0.151155	-0.510945	-0.313256	-0.12235	0.185812	-0.31892
ENSG00000187513.9	GJA4	magenta	M5	0.548221	0.100679	-0.192811	0.123057	0.471838	-0.227404	-0.069617	0.244331	0.475007	-0.248217	-0.388479	-0.0283528	-0.223674
ENSG00000163867.17	ZMYM6	purple	M6	-0.341552	-0.681688	0.0690164	-0.478124	-0.151738	0.263275	0.246606	0.583937	0.320612	0.277625	0.590596	0.84095	0.886416
ENSG00000197056.11	ZMYM1	purple	M6	-0.55184	-0.612853	0.215722	-0.319504	-0.18773	0.262688	-0.00533176	0.363296	-0.0579584	0.533706	0.713881	0.695424	0.789632
ENSG00000144580.13	CNOT9	turquoise	M1	0.204852	-0.710697	-0.173831	-0.814526	-0.253668	-0.285533	-0.0752902	0.972386	0.570723	0.197906	-0.0705428	0.760869	0.636703
ENSG00000146463.11	ZMYM4	black	M3	-0.380461	-0.815733	-0.0714632	-0.468379	-0.0849812	0.253986	0.149449	0.675286	0.33275	0.443121	0.534334	0.780766	0.886917
ENSG00000142687.18	KIAA0319L	pink	M4	-0.0510908	0.461794	0.824457	0.367851	-0.03176	0.041262	-0.0757228	-0.446793	-0.467866	-0.262176	0.544955	0.252753	-0.089219
ENSG00000020129.16	NCDN	magenta	M5	0.811364	0.708894	0.0340255	0.177145	0.0987189	-0.5323	-0.247191	-0.227916	0.046049	-0.61501	-0.785714	-0.466456	-0.811394
ENSG00000116819.8	TFAP2E	red	M2	0.575603	0.810995	0.706202	0.152357	-0.257201	-0.505459	-0.405988	-0.407527	-0.42876	-0.636882	-0.208839	-0.0600637	-0.600861
ENSG00000148943.12	LIN7C	turquoise	M1	0.280773	-0.64337	-0.115468	-0.892475	-0.375281	-0.41229	-0.21323	0.972317	0.606305	0.0802986	-0.153319	0.761524	0.57546
ENSG00000142686.8	C1orf216	red	M2	0.238364	0.306457	0.0114359	0.582439	0.460137	0.152132	0.0377733	-0.250985	0.026317	-0.429599	-0.0401715	-0.237611	-0.390832
ENSG00000134698.11	AGO4	black	M3	0.00968619	-0.314561	0.363474	-0.394735	-0.148974	-0.164125	-0.0861497	0.477195	0.481036	-0.0505973	0.370705	0.789016	0.529415
ENSG00000092847.12	AGO1	pink	M4	0.254404	0.165808	0.70823	-0.0600487	-0.170773	-0.437615	-0.492913	0.107511	0.0397316	-0.264274	0.234636	0.503069	-0.00280276
ENSG00000126070.20	AGO3	black	M3	0.181859	-0.265648	0.441009	-0.443304	-0.286595	-0.167893	-0.159039	0.545142	0.329747	-0.257971	0.366892	0.89947	0.517405
ENSG00000116863.11	ADPRHL2	magenta	M5	0.873528	0.523018	0.0153428	-0.190006	-0.187178	-0.682232	-0.292219	0.029393	0.0537038	-0.581511	-0.858949	-0.272128	-0.654563
ENSG00000171812.13	COL8A2	red	M2	0.0730931	0.684593	0.0577128	0.607755	0.136256	0.172311	-0.0968585	-0.768663	-0.368587	-0.502321	-0.174562	-0.693037	-0.666552
ENSG00000214114.9	MYCBP	turquoise	M1	0.196976	-0.715462	-0.207128	-0.880584	-0.325979	-0.313872	-0.0329375	0.971944	0.599095	0.154482	-0.125071	0.734972	0.626577
ENSG00000116871.15	MAP7D1	red	M2	0.420581	0.70533	-0.207515	0.410812	0.185575	-0.141852	-0.0236529	-0.535514	-0.149448	-0.383181	-0.627406	-0.814475	-0.784624
ENSG00000125977.7	EIF2S2	turquoise	M1	0.167302	-0.769705	-0.443062	-0.80104	-0.187845	-0.206858	0.046138	0.971892	0.678458	0.215541	-0.222679	0.571497	0.591637
ENSG00000214193.10	SH3D21	red	M2	-0.0396618	0.618727	0.368965	0.468075	-0.00251787	0.17905	0.104258	-0.682685	-0.551305	-0.281314	0.165377	-0.310682	-0.366177
ENSG00000130584.11	ZBTB46	blue	M10	0.0257017	0.681367	0.121286	0.946086	0.607087	0.289532	0.20398	-0.798899	-0.322212	-0.311856	0.0322484	-0.629012	-0.639814
ENSG00000196182.10	STK40	magenta	M5	0.863545	0.0455619	0.00453912	-0.496693	-0.22093	-0.672819	-0.333942	0.59183	0.57919	-0.626363	-0.603652	0.322295	-0.152888
ENSG00000119953.12	SMNDC1	turquoise	M1	0.190433	-0.704853	-0.216407	-0.82632	-0.247214	-0.259692	0.00366424	0.971858	0.703816	0.148292	-0.0731346	0.757526	0.665698
ENSG00000116885.18	OSCP1	pink	M4	0.110048	0.160469	0.680988	-0.0710198	-0.417071	-0.30727	-0.617348	-0.00374089	-0.350666	-0.181398	0.306604	0.391592	-0.000836745
ENSG00000069345.12	DNAJA2	turquoise	M1	0.211072	-0.687556	-0.0954623	-0.886628	-0.376669	-0.374855	-0.146904	0.971682	0.583905	0.141456	-0.0793242	0.793359	0.624906
ENSG00000119535.17	CSF3R	tan	M8	0.475524	-0.355048	-0.288322	-0.57674	-0.0589285	-0.347985	-0.0588561	0.751174	0.905998	-0.318079	-0.384444	0.43105	0.249232
ENSG00000163874.11	ZC3H12A	grey	M0	0.16586	-0.17946	-0.394458	-0.192711	0.106427	0.0323043	0.493998	0.27067	0.314177	-0.0758456	-0.288916	-0.012165	0.0619803
ENSG00000163875.15	MEAF6	black	M3	-0.186222	-0.790525	0.00812118	-0.746818	-0.404704	-0.0527206	-0.000433385	0.800439	0.3028	0.31301	0.3365	0.843962	0.817925
ENSG00000163877.11	SNIP1	black	M3	0.297536	-0.391665	0.167523	-0.760095	-0.443978	-0.356381	-0.043807	0.749853	0.446174	-0.129497	0.0363121	0.816916	0.521698
ENSG00000138385.16	SSB	turquoise	M1	0.241752	-0.690042	-0.326458	-0.794951	-0.211542	-0.281615	-0.0174963	0.971671	0.7609	0.120179	-0.18971	0.643133	0.580293
ENSG00000169218.14	RSPO1	red	M2	0.328794	0.846648	0.675216	0.281416	-0.403209	-0.388157	-0.581395	-0.648722	-0.63629	-0.585118	-0.131512	-0.314986	-0.700272
ENSG00000116922.14	C1orf109	magenta	M5	0.877426	0.275772	0.263056	-0.357411	-0.261987	-0.693864	-0.392154	0.338122	0.20263	-0.702987	-0.546375	0.260515	-0.326778
ENSG00000134690.11	CDCA8	greenyellow	M7	-0.651265	-0.464349	-0.278426	-0.0295109	0.102909	0.33561	0.19073	0.0340283	-0.189562	0.960107	0.30152	-0.0590939	0.406222
ENSG00000185090.14	MANEAL	magenta	M5	0.726554	0.236992	0.434851	-0.476955	-0.447308	-0.787383	-0.598673	0.32292	0.0456426	-0.559949	-0.411017	0.351158	-0.233391
ENSG00000124541.7	RRP36	turquoise	M1	0.201783	-0.732986	-0.256867	-0.781011	-0.204591	-0.274244	0.0102323	0.971572	0.648297	0.150132	-0.129681	0.697089	0.591987
ENSG00000197982.14	C1orf122	grey	M0	0.186074	0.192108	-0.533749	0.307629	0.456438	0.123107	0.34787	-0.207631	0.0224631	-0.0693506	-0.510802	-0.621514	-0.427356
ENSG00000136518.17	ACTL6A	turquoise	M1	0.187053	-0.717183	-0.207117	-0.850024	-0.300963	-0.33596	-0.14247	0.971557	0.576196	0.214662	-0.128112	0.70834	0.609179
ENSG00000204084.13	INPP5B	red	M2	0.0377829	0.265007	0.520296	0.46319	0.400713	0.161991	0.170505	-0.251034	-0.0588297	-0.358292	0.438004	0.264608	-0.0521041
ENSG00000104131.13	EIF3J	turquoise	M1	0.32267	-0.639972	-0.257921	-0.855123	-0.313917	-0.344774	-0.134889	0.97152	0.687543	-0.00805885	-0.240974	0.671747	0.531903
ENSG00000183386.10	FHL3	brown	M11	0.0162557	-0.260501	-0.620928	0.256414	0.745295	0.300661	0.322497	0.172864	0.526105	0.0723084	-0.178395	-0.205367	0.028444
ENSG00000086200.16	IPO11	turquoise	M1	0.249104	-0.6617	-0.111718	-0.836128	-0.312298	-0.349112	-0.160156	0.971453	0.621473	0.0757653	-0.0800095	0.788309	0.609247
ENSG00000185668.7	POU3F1	red	M2	0.552503	0.805557	0.536168	0.0147892	-0.440791	-0.658075	-0.625087	-0.43646	-0.481182	-0.496897	-0.457004	-0.319354	-0.730847
ENSG00000065548.18	ZC3H15	turquoise	M1	0.233942	-0.670091	-0.127696	-0.851224	-0.311478	-0.335928	-0.0699547	0.971152	0.640567	0.104965	-0.0877109	0.792857	0.626756
ENSG00000058804.12	NDC1	turquoise	M1	0.247593	-0.683266	-0.239739	-0.838917	-0.278761	-0.34825	-0.149451	0.971116	0.612378	0.189336	-0.183304	0.670859	0.568244
ENSG00000158315.11	RHBDL2	pink	M4	0.211425	0.706391	0.786342	0.0954019	-0.438193	-0.444073	-0.477802	-0.509437	-0.666485	-0.200967	0.0111123	-0.0760173	-0.444236
ENSG00000253729.7	PRKDC	turquoise	M1	0.320551	-0.627081	-0.174778	-0.830778	-0.285454	-0.398458	-0.13791	0.971112	0.660956	0.0860996	-0.195589	0.710774	0.536537
ENSG00000124193.16	SRSF6	turquoise	M1	0.13763	-0.754433	-0.234906	-0.793414	-0.206782	-0.189123	0.0574514	0.971104	0.662023	0.152049	-0.024354	0.766585	0.68915
ENSG00000127603.26	MACF1	black	M3	0.00182611	-0.307831	0.442545	-0.431059	-0.455674	-0.0699207	-0.228765	0.418592	0.0384909	-0.188201	0.420112	0.799629	0.495248
ENSG00000183682.8	BMP8A	salmon	M9	-0.662243	-0.386132	-0.438928	0.260658	0.307517	0.843145	0.585605	-0.138459	-0.0198394	0.321195	0.445859	-0.117635	0.395653
ENSG00000087263.16	OGFOD1	turquoise	M1	0.24102	-0.70891	-0.322865	-0.793256	-0.223084	-0.288447	-0.0200992	0.971099	0.66023	0.184133	-0.206489	0.627167	0.555882
ENSG00000010295.19	IFFO1	blue	M10	-0.146316	0.510061	0.0702549	0.941831	0.72849	0.484806	0.378411	-0.736511	-0.210327	-0.254272	0.221528	-0.50133	-0.426366
ENSG00000084072.16	PPIE	black	M3	0.356528	0.129526	0.676872	-0.247141	-0.239866	-0.463073	-0.335996	0.215349	0.0234611	-0.306749	0.106752	0.609893	0.0504894
ENSG00000116985.12	BMP8B	salmon	M9	-0.521462	-0.169427	-0.239894	0.342315	0.284199	0.795326	0.584915	-0.224504	-0.00521049	0.124601	0.519706	-0.0645441	0.331062
ENSG00000043514.16	TRIT1	black	M3	0.310348	-0.247462	0.451485	-0.565682	-0.369644	-0.336104	-0.182275	0.600179	0.234881	-0.204088	0.19265	0.889047	0.437499
ENSG00000116990.11	MYCL	red	M2	0.351575	0.857356	0.623878	0.204422	-0.311201	-0.436423	-0.434803	-0.608805	-0.544377	-0.41044	-0.206787	-0.308948	-0.647032
ENSG00000168389.17	MFSD2A	pink	M4	0.406821	0.562759	0.896244	-0.1282	-0.499626	-0.593934	-0.581807	-0.199528	-0.44416	-0.409837	0.0114481	0.28559	-0.298813
ENSG00000058729.11	RIOK2	turquoise	M1	0.234253	-0.679565	-0.179479	-0.83929	-0.290725	-0.363333	-0.123894	0.970859	0.653728	0.143484	-0.132289	0.729922	0.592296
ENSG00000153989.8	NUS1	turquoise	M1	0.25833	-0.70967	-0.431359	-0.810056	-0.179843	-0.249389	0.0367934	0.970475	0.736601	0.08377	-0.280935	0.570445	0.541819
ENSG00000117000.9	RLF	black	M3	0.0420882	-0.679527	0.0288764	-0.786352	-0.375969	-0.140505	-0.000602248	0.860099	0.505625	0.111839	0.216225	0.902428	0.766001
ENSG00000134697.13	GNL2	turquoise	M1	0.323587	-0.666404	-0.348845	-0.808404	-0.214551	-0.330161	-0.0721333	0.970444	0.702322	0.0208875	-0.306294	0.595857	0.485289
ENSG00000049089.15	COL9A2	red	M2	0.382816	0.925724	0.280949	0.467166	0.0163996	-0.253749	-0.208739	-0.737353	-0.416859	-0.476061	-0.391634	-0.659247	-0.836724
ENSG00000084070.12	SMAP2	tan	M8	0.152326	-0.186059	-0.430539	-0.0616971	0.376754	0.105668	0.40749	0.299584	0.819949	-0.159366	-0.173185	0.0564967	0.1609
ENSG00000132953.16	XPO4	turquoise	M1	0.252205	-0.663203	-0.113725	-0.820627	-0.28985	-0.286626	-0.0348671	0.970338	0.627681	0.0560783	-0.0426392	0.82223	0.642244
ENSG00000187815.10	ZFP69	magenta	M5	0.570836	0.252088	0.0996408	-0.304477	-0.285602	-0.619842	-0.520965	0.138032	-0.0350479	-0.340745	-0.565554	-0.0556128	-0.361905
ENSG00000164002.11	EXO5	black	M3	0.143726	-0.328146	0.0876143	-0.217486	0.16196	-0.127382	0.0437702	0.473717	0.232825	0.202447	0.137968	0.498389	0.325599
ENSG00000117010.17	ZNF684	black	M3	-0.06283	-0.179936	0.315025	-0.163778	-0.0196919	0.00731428	0.131967	0.289321	0.326945	0.0654705	0.445417	0.613378	0.46694
ENSG00000117016.10	RIMS3	grey	M0	-0.289898	0.0371308	0.0451257	0.00420219	-0.287414	0.308626	0.0444606	-0.26239	-0.324678	-0.0764353	0.21936	-0.0847797	0.0795824
ENSG00000066136.20	NFYC	black	M3	0.344833	-0.318813	0.309294	-0.594279	-0.25572	-0.411075	-0.26517	0.715585	0.551703	-0.21752	0.0996158	0.862657	0.452973
ENSG00000179862.6	CITED4	red	M2	0.524859	0.807062	0.130702	0.164674	-0.21016	-0.416411	-0.328666	-0.497609	-0.29788	-0.485544	-0.606844	-0.602015	-0.775362
ENSG00000147679.12	UTP23	turquoise	M1	0.24939	-0.669881	-0.188049	-0.809828	-0.280345	-0.298332	-0.122191	0.970337	0.672408	0.081706	-0.0953012	0.745005	0.610139
ENSG00000010803.16	SCMH1	black	M3	0.0952804	0.070821	0.52201	0.0453924	-0.198217	-0.0655356	-0.326608	0.0542245	-0.195093	-0.15464	0.383224	0.42771	0.111257
ENSG00000127124.16	HIVEP3	magenta	M5	0.772151	0.292197	0.226735	-0.396452	-0.331548	-0.635754	-0.39628	0.300883	0.26441	-0.55053	-0.491455	0.229681	-0.234365
ENSG00000198815.9	FOXJ3	black	M3	0.13722	-0.616071	0.0971545	-0.733715	-0.300852	-0.211912	-0.0713596	0.872151	0.564321	0.0406881	0.202085	0.934953	0.715479
ENSG00000127125.9	PPCS	black	M3	-0.0294845	-0.67888	0.0870442	-0.820658	-0.413328	-0.265231	-0.183702	0.811797	0.339001	0.303761	0.176533	0.84427	0.718504
ENSG00000154582.16	ELOC	turquoise	M1	0.144042	-0.759948	-0.364102	-0.815288	-0.221144	-0.18964	-0.0224117	0.970302	0.667215	0.222397	-0.129978	0.64686	0.654904
ENSG00000078140.14	UBE2K	turquoise	M1	0.104061	-0.771805	-0.258712	-0.869947	-0.313768	-0.211944	-0.00806934	0.970021	0.59502	0.223483	-0.0522309	0.734294	0.704651
ENSG00000117385.15	P3H1	salmon	M9	-0.678422	-0.245629	-0.534276	0.454953	0.519289	0.658236	0.506719	-0.331622	-0.176356	0.669764	0.194041	-0.509053	0.0844208
ENSG00000164008.16	C1orf50	pink	M4	0.21618	0.143634	0.697849	-0.139433	-0.339452	-0.296867	-0.117139	0.111997	-0.0889431	-0.288229	0.335798	0.567137	0.104117
ENSG00000177868.12	SVBP	greenyellow	M7	-0.695156	-0.460695	-0.185444	0.179423	0.246773	0.661105	0.61856	-0.00843245	-0.0650678	0.613394	0.621541	0.130057	0.533625
ENSG00000164010.15	ERMAP	red	M2	-0.362572	0.427296	0.573465	0.711968	0.304784	0.327155	0.103196	-0.682041	-0.49588	0.0346997	0.630634	-0.0990868	-0.149083
ENSG00000164011.18	ZNF691	black	M3	0.308515	0.177661	0.533256	-0.0429785	-0.175773	-0.298407	-0.276188	0.0673854	0.0534265	-0.543496	0.0836152	0.408856	-0.092243
ENSG00000117394.22	SLC2A1	greenyellow	M7	-0.340051	-0.165794	-0.262271	-0.133909	-0.223647	0.256736	0.225104	-0.0844834	-0.336579	0.506483	0.0550151	-0.207782	0.171299
ENSG00000117395.12	EBNA1BP2	magenta	M5	0.836498	-0.0498351	-0.198549	-0.579479	-0.196983	-0.65096	-0.23341	0.657589	0.586265	-0.446596	-0.729956	0.229134	-0.122675
ENSG00000179178.11	TMEM125	red	M2	0.430171	0.901889	0.543755	0.231619	-0.357575	-0.491135	-0.525637	-0.635418	-0.548326	-0.515081	-0.357871	-0.445427	-0.791962
ENSG00000253313.5	C1orf210	red	M2	0.296248	0.802977	0.705933	0.143064	-0.492545	-0.459864	-0.600987	-0.600986	-0.710023	-0.43486	-0.150166	-0.254696	-0.630742
ENSG00000159674.12	SPON2	blue	M10	-0.304671	0.502204	-0.0173024	0.94058	0.601974	0.524177	0.225275	-0.850441	-0.408879	-0.0625061	0.197033	-0.692235	-0.463437
ENSG00000117399.14	CDC20	greenyellow	M7	-0.637418	-0.483199	-0.324099	-0.0487262	0.120995	0.35545	0.230624	0.0715296	-0.130909	0.946424	0.2985	-0.0530585	0.437625
ENSG00000066322.15	ELOVL1	black	M3	-0.0560135	-0.342013	0.38945	-0.592508	-0.631325	-0.297685	-0.517314	0.444806	-0.139091	0.195153	0.284518	0.644793	0.452893
ENSG00000187109.14	NAP1L1	turquoise	M1	0.0876122	-0.799175	-0.335293	-0.742603	-0.142972	-0.0773956	0.172546	0.969847	0.694712	0.199185	0.00629394	0.723743	0.725351
ENSG00000198198.16	SZT2	red	M2	0.309616	0.782897	0.722116	0.531318	0.0500982	-0.129932	-0.223312	-0.584534	-0.410674	-0.627818	0.152215	-0.0730012	-0.514194
ENSG00000178922.16	HYI	red	M2	0.244816	0.934066	0.562778	0.637843	0.00235971	-0.167743	-0.242607	-0.817275	-0.633451	-0.432816	-0.049458	-0.494812	-0.761679
ENSG00000142949.17	PTPRF	pink	M4	0.39274	0.833462	0.758926	0.130437	-0.48037	-0.566602	-0.625125	-0.552257	-0.674231	-0.421451	-0.181537	-0.218922	-0.66043
ENSG00000066135.13	KDM4A	red	M2	0.0635922	0.580827	0.712953	0.396137	-0.0203791	-0.0221591	-0.000836251	-0.542576	-0.498968	-0.372032	0.298188	0.029921	-0.310032
ENSG00000117408.11	IPO13	red	M2	0.419593	0.416938	0.378087	0.181398	0.00610653	-0.275923	-0.341196	-0.16219	-0.147529	-0.542865	-0.156038	0.00620546	-0.397874
ENSG00000132768.14	DPH2	magenta	M5	0.83123	-0.0619306	-0.132397	-0.558071	-0.19063	-0.626912	-0.248524	0.661119	0.534464	-0.474212	-0.660317	0.297172	-0.0996325
ENSG00000117410.14	ATP6V0B	tan	M8	0.278673	-0.553133	-0.576434	-0.410908	0.337404	-0.0805112	0.21596	0.764609	0.903057	0.0471996	-0.323915	0.308822	0.356695
ENSG00000168283.14	BMI1	turquoise	M1	0.280889	-0.651613	-0.24438	-0.821636	-0.266006	-0.317886	-0.0697475	0.969786	0.726737	0.0380086	-0.169702	0.699684	0.578199
ENSG00000196517.11	SLC6A9	pink	M4	0.236643	0.768189	0.870277	0.196866	-0.379507	-0.426777	-0.512008	-0.565946	-0.651503	-0.346033	0.0619706	-0.0575025	-0.496289
ENSG00000178028.14	DMAP1	red	M2	0.464096	0.91188	0.678745	0.49548	0.0144945	-0.345892	-0.282137	-0.624242	-0.449288	-0.619888	-0.115453	-0.256248	-0.729413
ENSG00000117419.15	ERI3	magenta	M5	0.870736	0.558736	0.459532	-0.229052	-0.376913	-0.83949	-0.595668	0.0791801	-0.0623069	-0.56835	-0.556927	0.0571024	-0.537473
ENSG00000187147.18	RNF220	magenta	M5	0.868206	0.773276	0.395621	0.137598	-0.13774	-0.636742	-0.435832	-0.211934	-0.0816712	-0.826112	-0.565711	-0.209017	-0.769781
ENSG00000126106.14	TMEM53	red	M2	0.710932	0.771845	0.353507	0.281772	0.0282278	-0.566108	-0.403604	-0.31508	-0.140596	-0.625429	-0.502695	-0.331232	-0.78514
ENSG00000142945.13	KIF2C	greenyellow	M7	-0.699905	-0.407436	-0.30625	0.137324	0.258209	0.453332	0.310892	-0.0702802	-0.202774	0.946771	0.363113	-0.14336	0.369601
ENSG00000142937.12	RPS8	black	M3	0.018435	-0.453599	0.220207	-0.536385	-0.329605	-0.254251	-0.0201277	0.556791	0.0950968	0.140501	0.166781	0.657535	0.430098
ENSG00000173846.13	PLK3	tan	M8	0.587593	-0.139984	-0.429541	-0.246466	0.312491	-0.237853	0.179518	0.538499	0.850491	-0.369845	-0.533114	0.113825	-0.0203853
ENSG00000222009.8	BTBD19	brown	M11	-0.314613	-0.0795959	-0.46464	0.659183	0.889027	0.71466	0.566858	-0.257908	0.184284	0.0740917	0.190281	-0.330783	0.0163781
ENSG00000168827.14	GFM1	turquoise	M1	0.360021	-0.624197	-0.22746	-0.789749	-0.219977	-0.318332	-0.055596	0.969766	0.671476	-0.0270167	-0.20726	0.700168	0.520515
ENSG00000126107.15	HECTD3	red	M2	0.527607	0.970624	0.624162	0.42613	-0.11497	-0.465566	-0.467318	-0.647969	-0.504482	-0.621895	-0.277028	-0.393507	-0.842318
ENSG00000126088.14	UROD	red	M2	0.134614	0.46962	0.362927	0.481373	0.196651	-0.20956	-0.12443	-0.415574	-0.44545	0.0433568	0.00634533	-0.291684	-0.478477
ENSG00000100528.12	CNIH1	turquoise	M1	0.142236	-0.769616	-0.37912	-0.839326	-0.260304	-0.213877	-0.0439632	0.969635	0.664373	0.177733	-0.164971	0.624039	0.628812
ENSG00000132781.17	MUTYH	red	M2	0.642378	0.880568	0.640986	0.314788	-0.149037	-0.46936	-0.340595	-0.456467	-0.361253	-0.747304	-0.246093	-0.174792	-0.718991
ENSG00000138668.19	HNRNPD	turquoise	M1	0.216025	-0.67742	-0.162402	-0.863799	-0.311308	-0.316291	-0.0128066	0.969617	0.683967	0.107811	-0.0841416	0.777431	0.647596
ENSG00000070759.17	TESK2	pink	M4	0.0725744	0.603769	0.935904	0.254175	-0.250215	-0.278128	-0.392229	-0.49623	-0.566111	-0.273979	0.340416	0.13667	-0.293295
ENSG00000107566.14	ERLIN1	turquoise	M1	0.216088	-0.703436	-0.183243	-0.852906	-0.337832	-0.30165	-0.104002	0.969546	0.593062	0.0995302	-0.0988253	0.739446	0.611735
ENSG00000149313.11	AASDHPPT	turquoise	M1	0.145699	-0.742098	-0.179313	-0.853937	-0.300251	-0.260198	-0.0578306	0.969524	0.622684	0.160407	-0.0483643	0.780465	0.674786
ENSG00000117448.13	AKR1A1	red	M2	-0.065423	0.327063	0.00209052	0.628967	0.529555	0.248082	0.473227	-0.482754	-0.189109	-0.0845468	0.0627432	-0.414869	-0.365118
ENSG00000115875.19	SRSF7	turquoise	M1	0.342549	-0.635727	-0.22268	-0.803268	-0.214566	-0.346506	-0.0285934	0.969315	0.652723	0.0378014	-0.222969	0.697488	0.518198
ENSG00000159588.15	CCDC17	red	M2	0.120283	0.635753	0.446597	0.580319	0.259753	0.112852	0.176591	-0.575009	-0.224012	-0.485234	0.182576	-0.150815	-0.377765
ENSG00000159592.11	GPBP1L1	pink	M4	0.165441	0.0428016	0.836866	-0.358171	-0.492044	-0.411722	-0.478823	0.220683	-0.129487	-0.225417	0.382911	0.765648	0.246713
ENSG00000115233.12	PSMD14	turquoise	M1	0.091515	-0.795358	-0.369574	-0.835371	-0.247816	-0.200958	0.0352232	0.969136	0.643524	0.290678	-0.124808	0.638218	0.666728
ENSG00000197429.10	IPP	pink	M4	0.0255561	0.440586	0.891415	0.146582	-0.329437	-0.230424	-0.265673	-0.345614	-0.531639	-0.200315	0.421567	0.274821	-0.133981
ENSG00000086015.21	MAST2	red	M2	0.19912	0.738009	0.560679	0.590471	0.0356025	-0.0181923	-0.312285	-0.647993	-0.473362	-0.521081	0.119663	-0.242614	-0.539824
ENSG00000138600.10	SPPL2A	turquoise	M1	0.0681118	-0.814065	-0.373597	-0.807711	-0.19166	-0.148198	0.0997123	0.968952	0.678176	0.232909	-0.0770778	0.66497	0.694537
ENSG00000085998.14	POMGNT1	magenta	M5	0.821253	0.287275	0.404378	-0.262643	-0.259213	-0.708709	-0.543733	0.322218	0.129801	-0.57692	-0.384044	0.324549	-0.294221
ENSG00000171357.6	LURAP1	red	M2	0.378755	0.943796	0.523212	0.413088	-0.207698	-0.350747	-0.426799	-0.72907	-0.585913	-0.538278	-0.261428	-0.506437	-0.815571
ENSG00000146676.9	PURB	turquoise	M1	0.141233	-0.735122	-0.22461	-0.869211	-0.323376	-0.222859	-0.0280166	0.968908	0.612942	0.18839	-0.0472074	0.757473	0.702472
ENSG00000085760.14	MTIF2	turquoise	M1	0.14866	-0.741821	-0.203377	-0.786902	-0.215706	-0.192306	0.0543801	0.968893	0.603198	0.167008	0.00179339	0.777966	0.693129
ENSG00000164163.11	ABCE1	turquoise	M1	0.386444	-0.609477	-0.305545	-0.837161	-0.267001	-0.388081	-0.114007	0.968763	0.713703	-0.0182802	-0.335323	0.605877	0.458405
ENSG00000117480.16	FAAH	red	M2	0.433413	0.886391	0.398773	0.408678	-0.0843915	-0.209673	-0.170105	-0.637247	-0.410062	-0.602613	-0.24525	-0.438409	-0.709075
ENSG00000174695.10	TMEM167A	turquoise	M1	0.0458525	-0.822324	-0.377462	-0.827957	-0.246628	-0.13767	0.0265959	0.968725	0.67409	0.240384	-0.0677565	0.666544	0.712291
ENSG00000142961.14	MOB3C	magenta	M5	0.808757	0.561316	0.0950826	0.151757	0.0977517	-0.410525	-0.199208	-0.0779268	0.187299	-0.855623	-0.56916	-0.211451	-0.637189
ENSG00000123472.12	ATPAF1	black	M3	0.381239	-0.324592	0.323819	-0.6557	-0.333365	-0.488552	-0.145256	0.735918	0.39321	-0.131216	0.0468096	0.843924	0.41492
ENSG00000148459.16	PDSS1	turquoise	M1	0.355082	-0.638915	-0.388105	-0.762669	-0.138976	-0.272019	0.0419801	0.968723	0.764455	0.00113914	-0.292613	0.589559	0.498443
ENSG00000186377.8	CYP4X1	pink	M4	0.292686	0.643572	0.868304	0.234254	-0.310537	-0.464454	-0.577086	-0.400983	-0.502906	-0.407182	0.122423	0.065894	-0.455764
ENSG00000162366.8	PDZK1IP1	grey	M0	0.0542729	-0.0467059	-0.169004	-0.116435	-0.0545207	0.0185767	0.35845	0.0520323	0.0195219	-0.0785915	-0.176265	-0.0584697	-0.0278295
ENSG00000162367.11	TAL1	red	M2	0.351633	0.804009	0.446735	0.660593	0.17157	-0.10312	-0.222611	-0.637116	-0.372941	-0.630651	-0.0553532	-0.38699	-0.705741
ENSG00000146842.17	TMEM209	turquoise	M1	0.150113	-0.725548	-0.148411	-0.8275	-0.296805	-0.214707	-0.0391064	0.968686	0.606607	0.160128	0.0283655	0.82169	0.718373
ENSG00000269113.4	TRABD2B	magenta	M5	0.806298	0.399655	0.293139	-0.241252	-0.339124	-0.718199	-0.568085	0.204059	0.260707	-0.646488	-0.502996	0.123129	-0.394849
ENSG00000132122.12	SPATA6	pink	M4	-0.230705	0.0974432	0.849701	0.0254538	-0.276412	-0.0300868	-0.222523	-0.130519	-0.374891	0.0304282	0.715756	0.576444	0.271083
ENSG00000162373.13	BEND5	red	M2	0.0612842	0.787339	0.491667	0.816489	0.316488	0.0734414	-0.0643467	-0.836797	-0.497342	-0.411762	0.131531	-0.453345	-0.656252
ENSG00000185104.20	FAF1	black	M3	0.381032	-0.164537	0.546524	-0.552993	-0.423567	-0.490242	-0.27791	0.57239	0.221966	-0.249326	0.136188	0.856537	0.323936
ENSG00000123080.12	CDKN2C	greenyellow	M7	-0.527759	0.164618	0.136904	0.484617	0.17499	0.241285	0.117202	-0.56096	-0.634308	0.612078	0.324218	-0.404366	-0.141956
ENSG00000135018.14	UBQLN1	turquoise	M1	0.304726	-0.637975	-0.148525	-0.86769	-0.344727	-0.354194	-0.152937	0.96854	0.605049	0.00293799	-0.151729	0.755233	0.571874
ENSG00000165678.21	GHITM	turquoise	M1	0.326554	-0.635216	-0.211531	-0.819523	-0.264403	-0.4028	-0.0987529	0.968521	0.662772	0.0582132	-0.229833	0.671407	0.501402
ENSG00000085832.17	EPS15	black	M3	-0.224412	-0.534641	0.38281	-0.372836	-0.16317	0.0342348	0.0370761	0.525916	0.200023	0.220899	0.642458	0.907032	0.727219
ENSG00000117859.19	OSBPL9	green	M13	-0.532187	-0.33516	0.341365	0.171462	0.152001	0.512473	0.253928	0.0515797	0.0136267	0.166341	0.915362	0.590998	0.614324
ENSG00000078618.21	NRDC	black	M3	0.386203	-0.275248	0.421961	-0.718705	-0.475062	-0.57961	-0.401856	0.689638	0.371748	-0.219572	0.000663513	0.846812	0.359092
ENSG00000108064.11	TFAM	turquoise	M1	0.33441	-0.6312	-0.226564	-0.827041	-0.255241	-0.385648	-0.11471	0.968441	0.662746	0.0421217	-0.248596	0.670784	0.503373
ENSG00000179119.15	SPTY2D1	turquoise	M1	0.0615228	-0.81126	-0.302873	-0.840638	-0.276649	-0.186368	-0.0392618	0.968291	0.641073	0.230321	-0.0522204	0.703392	0.701283
ENSG00000156261.13	CCT8	turquoise	M1	0.29187	-0.668108	-0.358442	-0.781454	-0.1585	-0.280031	0.0497258	0.968254	0.732517	0.078383	-0.249892	0.61285	0.534709
ENSG00000157077.14	ZFYVE9	black	M3	0.338796	0.00365289	0.678239	-0.412443	-0.552209	-0.454298	-0.462321	0.331319	-0.126866	-0.370031	0.184582	0.695705	0.14526
ENSG00000154222.14	CC2D1B	red	M2	0.308693	0.779669	0.180073	0.724464	0.423903	0.076271	0.163253	-0.680089	-0.224053	-0.591856	-0.172854	-0.534938	-0.701044
ENSG00000085840.13	ORC1	greenyellow	M7	-0.614433	-0.437114	-0.246114	-0.0284279	0.131485	0.293213	0.219606	0.037265	-0.140837	0.940345	0.28559	-0.0410167	0.389371
ENSG00000161813.22	LARP4	turquoise	M1	0.358025	-0.62287	-0.235176	-0.837062	-0.280213	-0.360812	-0.127139	0.9682	0.648864	-0.0275847	-0.255289	0.674941	0.500802
ENSG00000134744.14	TUT4	black	M3	-0.170896	-0.328502	0.509406	-0.316429	-0.204651	0.0361593	0.00974842	0.364507	0.102051	0.0615501	0.630323	0.87403	0.636226
ENSG00000116157.6	GPX7	greenyellow	M7	-0.755805	-0.528765	-0.40958	0.106476	0.26911	0.536016	0.292929	-0.0141149	-0.107326	0.861796	0.36945	-0.130893	0.423623
ENSG00000144840.9	RABL3	turquoise	M1	0.220775	-0.66574	-0.0966843	-0.858158	-0.355355	-0.335029	-0.127925	0.967689	0.598607	0.121841	-0.0392097	0.805154	0.648563
ENSG00000162378.13	ZYG11B	purple	M6	-0.483216	-0.752863	0.032941	-0.402339	-0.106952	0.242697	0.104773	0.56598	0.254968	0.556401	0.651275	0.750513	0.892494
ENSG00000121310.17	ECHDC2	pink	M4	0.24046	0.830149	0.862938	0.330037	-0.2974	-0.339326	-0.422859	-0.641898	-0.657466	-0.436594	0.110776	-0.11193	-0.544907
ENSG00000116171.18	SCP2	purple	M6	-0.521842	-0.402933	0.397635	-0.229768	-0.253708	0.0439642	-0.0362647	0.187916	-0.203012	0.636092	0.67003	0.552582	0.585444
ENSG00000174348.13	PODN	red	M2	0.263897	0.911746	0.354923	0.645669	0.0885354	-0.187996	-0.319494	-0.832226	-0.528293	-0.463883	-0.248577	-0.696814	-0.879746
ENSG00000157184.7	CPT2	black	M3	-0.0541847	-0.100503	0.519086	-0.156918	-0.0597431	-0.204405	-0.228795	0.195405	0.0284783	0.170377	0.410033	0.565672	0.319399
ENSG00000162384.14	CZIB	black	M3	-0.125235	-0.145948	0.419615	0.123432	0.0169846	0.0458212	-0.178045	0.105301	-0.0840302	-0.0135271	0.503305	0.446138	0.217423
ENSG00000109332.20	UBE2D3	turquoise	M1	0.0651451	-0.796048	-0.33831	-0.825994	-0.233681	-0.140108	0.0514025	0.967548	0.719249	0.204513	-0.0416034	0.706349	0.728908
ENSG00000115368.10	WDR75	turquoise	M1	0.27023	-0.653181	-0.121206	-0.833861	-0.293462	-0.311731	-0.0739639	0.967525	0.643887	0.0291716	-0.0847647	0.80839	0.61835
ENSG00000174332.5	GLIS1	salmon	M9	-0.335207	0.286089	0.096114	0.4804	0.1073	0.60416	0.371742	-0.555147	-0.305117	-0.204807	0.43179	-0.208696	-0.0168473
ENSG00000136731.12	UGGT1	turquoise	M1	0.228111	-0.717642	-0.390527	-0.750123	-0.12004	-0.24018	0.0613841	0.967395	0.750495	0.172449	-0.21162	0.597777	0.565222
ENSG00000122068.13	FYTTD1	turquoise	M1	0.161251	-0.731351	-0.189449	-0.894835	-0.386635	-0.325076	-0.176573	0.967329	0.562605	0.176799	-0.107975	0.729768	0.631737
ENSG00000081870.11	HSPB11	purple	M6	-0.659308	-0.804805	-0.114216	-0.372773	-0.0486662	0.416373	0.359079	0.474651	0.206722	0.723756	0.668851	0.631213	0.941903
ENSG00000169446.5	MMGT1	turquoise	M1	0.208132	-0.689597	-0.131219	-0.855161	-0.348218	-0.317082	-0.107834	0.967326	0.64043	0.0590038	-0.0591556	0.787	0.632826
ENSG00000116209.11	TMEM59	purple	M6	-0.408247	-0.450945	0.189252	-0.311236	-0.257814	0.0428586	0.187826	0.266167	-0.102939	0.494894	0.46092	0.465775	0.519134
ENSG00000116205.14	TCEANC2	pink	M4	-0.122846	0.26559	0.75378	0.268991	0.0207245	-0.0598215	-0.193046	-0.313322	-0.368386	-0.0998988	0.497848	0.282095	-0.0409158
ENSG00000124562.10	SNRPC	turquoise	M1	0.26359	-0.695735	-0.380743	-0.736231	-0.076673	-0.262155	0.026781	0.967326	0.753665	0.147584	-0.232968	0.594034	0.540497
ENSG00000157216.15	SSBP3	pink	M4	0.312249	0.573105	0.853828	0.108288	-0.321457	-0.477391	-0.547327	-0.260496	-0.307266	-0.327659	0.171956	0.213548	-0.28456
ENSG00000162390.17	ACOT11	red	M2	-0.0974954	0.561262	0.484023	0.561624	0.155726	0.199862	0.182672	-0.667602	-0.496745	-0.233506	0.304422	-0.196964	-0.317584
ENSG00000162396.6	PARS2	pink	M4	0.57808	0.384115	0.6163	-0.17533	-0.42563	-0.636949	-0.694256	0.013701	-0.256609	-0.617844	-0.246913	0.221573	-0.392297
ENSG00000006555.11	TTC22	red	M2	0.248866	0.789784	0.446688	0.25306	-0.260325	-0.261481	-0.158067	-0.642788	-0.583928	-0.360166	-0.198061	-0.412536	-0.61655
ENSG00000116133.13	DHCR24	pink	M4	0.511324	0.704774	0.85551	-0.0076328	-0.510108	-0.69619	-0.720412	-0.320513	-0.51005	-0.541593	-0.167807	0.0448107	-0.568207
ENSG00000169174.10	PCSK9	red	M2	0.40715	0.387457	0.210885	-0.00638475	-0.135118	-0.340774	0.0259279	-0.132714	-0.185668	-0.362504	-0.338825	-0.107446	-0.396698
ENSG00000162402.14	USP24	black	M3	0.257867	-0.493988	0.160464	-0.640014	-0.246541	-0.242334	-0.0473344	0.823477	0.5717	-0.121241	0.171528	0.922923	0.612873
ENSG00000162407.9	PLPP3	magenta	M5	0.790858	0.167693	0.238461	-0.416164	-0.366342	-0.717205	-0.516761	0.429734	0.340911	-0.588741	-0.458369	0.3038	-0.219557
ENSG00000162600.12	OMA1	black	M3	-0.227376	-0.260182	0.628498	-0.309474	-0.353131	-0.107685	-0.334503	0.235046	-0.11495	0.0600921	0.580457	0.750339	0.474766
ENSG00000184292.6	TACSTD2	pink	M4	-0.157389	0.439038	0.628507	0.0362035	-0.500326	-0.11484	-0.192007	-0.499474	-0.743764	-0.00159865	0.257257	-0.0411168	-0.163792
ENSG00000162601.11	MYSM1	black	M3	-0.186585	-0.757313	-0.00884408	-0.678396	-0.260379	0.0813994	0.163012	0.784586	0.454544	0.243591	0.413577	0.905528	0.894684
ENSG00000177606.6	JUN	red	M2	0.374418	0.665231	0.022634	0.648762	0.539523	-0.111816	-0.115694	-0.542168	-0.192866	-0.359258	-0.386228	-0.636292	-0.764872
ENSG00000134709.11	HOOK1	purple	M6	-0.584363	-0.52078	0.156075	-0.40934	-0.42002	0.277173	0.0675776	0.235282	-0.236857	0.506208	0.602784	0.535311	0.71931
ENSG00000162599.17	NFIA	pink	M4	0.14361	0.313387	0.952149	-0.0397491	-0.36779	-0.404132	-0.486424	-0.0995987	-0.372713	-0.212585	0.382946	0.511255	-0.0256269
ENSG00000162604.12	TM2D1	black	M3	-0.187824	-0.638528	0.0984582	-0.536425	-0.20077	0.132242	0.295729	0.656153	0.331166	0.226058	0.488247	0.880881	0.829775
ENSG00000132849.20	PATJ	pink	M4	0.150563	0.166893	0.873343	-0.304529	-0.576612	-0.383962	-0.441875	0.0664883	-0.340283	-0.233294	0.35124	0.65205	0.144929
ENSG00000139726.11	DENR	turquoise	M1	0.0843701	-0.793455	-0.335321	-0.828349	-0.239915	-0.198941	0.0302857	0.96732	0.627092	0.279489	-0.0924793	0.66812	0.679864
ENSG00000116641.17	DOCK7	black	M3	-0.137239	-0.677538	0.147702	-0.636919	-0.282971	-0.102052	-0.138562	0.735751	0.317467	0.327162	0.377711	0.874268	0.768479
ENSG00000125703.15	ATG4C	purple	M6	-0.408479	-0.767664	-0.190211	-0.378361	0.0872314	0.289248	0.256243	0.613404	0.437154	0.490583	0.498881	0.648464	0.858586
ENSG00000088035.18	ALG6	black	M3	-0.144678	-0.668227	0.158057	-0.68344	-0.291502	-0.0764943	-0.00503052	0.739033	0.359661	0.282074	0.390025	0.926985	0.817955
ENSG00000142856.16	ITGB3BP	black	M3	-0.319623	-0.543562	0.190069	-0.455896	-0.213118	-0.00935682	-0.0400679	0.459364	0.0193427	0.525923	0.466138	0.668136	0.683149
ENSG00000079739.17	PGM1	grey	M0	0.182218	-0.0602286	0.000735504	-0.247705	-0.249723	-0.441782	-0.454761	0.179514	-0.146473	0.198648	-0.319778	-0.0580879	-0.160315
ENSG00000185483.12	ROR1	red	M2	0.241245	0.678963	0.470925	0.414492	0.00818298	-0.383683	-0.460067	-0.543884	-0.434655	-0.127509	-0.156485	-0.381395	-0.640845
ENSG00000158966.15	CACHD1	pink	M4	0.688582	0.667015	0.767452	-0.0914698	-0.474469	-0.787328	-0.708567	-0.128315	-0.283227	-0.579593	-0.261367	0.132099	-0.518888
ENSG00000162437.14	RAVER2	pink	M4	0.227911	0.268492	0.873564	-0.248654	-0.560654	-0.563847	-0.58056	0.0361829	-0.329032	-0.0790512	0.236595	0.509986	0.00454596
ENSG00000039123.16	MTREX	turquoise	M1	0.323959	-0.61384	-0.0958382	-0.841015	-0.315279	-0.375425	-0.113	0.96723	0.65441	-0.0234085	-0.127206	0.794191	0.567707
ENSG00000084073.9	ZMPSTE24	turquoise	M1	0.130027	-0.76667	-0.358877	-0.819251	-0.235511	-0.235674	-0.0389301	0.967173	0.684724	0.246981	-0.143232	0.629396	0.635483
ENSG00000213625.9	LEPROT	purple	M6	-0.378544	-0.884538	-0.254531	-0.545283	-0.103915	0.281379	0.168028	0.733334	0.498381	0.358724	0.433686	0.714768	0.907195
ENSG00000116678.19	LEPR	pink	M4	0.177671	0.279246	0.776546	-0.0879015	-0.424227	-0.443861	-0.558467	-0.0814112	-0.320329	-0.308196	0.203024	0.344002	-0.137046
ENSG00000087470.17	DNM1L	turquoise	M1	0.0395398	-0.814809	-0.332748	-0.833724	-0.259722	-0.139962	-0.00372462	0.967048	0.636318	0.272261	-0.0315484	0.701447	0.737016
ENSG00000118473.22	SGIP1	salmon	M9	-0.427643	-0.35208	-0.339686	0.152565	0.230984	0.764843	0.587342	0.0591031	0.23144	0.0396069	0.495559	0.142255	0.503742
ENSG00000099341.11	PSMD8	turquoise	M1	0.253262	-0.685759	-0.251612	-0.842443	-0.284743	-0.351845	-0.173284	0.967011	0.618364	0.128374	-0.204719	0.659578	0.550819
ENSG00000116704.8	SLC35D1	black	M3	-0.272788	-0.801208	-0.0683757	-0.682521	-0.311475	0.073135	-0.0361344	0.731569	0.259511	0.364911	0.338852	0.76977	0.821394
ENSG00000145907.15	G3BP1	turquoise	M1	0.399779	-0.593664	-0.231481	-0.831321	-0.278251	-0.397664	-0.117014	0.966906	0.682977	-0.0581308	-0.295487	0.66036	0.462924
ENSG00000149084.13	HSD17B12	turquoise	M1	0.0898713	-0.778189	-0.247034	-0.867829	-0.335049	-0.242044	-0.0576636	0.966878	0.566194	0.246807	-0.0582052	0.720311	0.684605
ENSG00000116717.13	GADD45A	magenta	M5	0.445351	0.153741	-0.291719	0.0607278	0.186042	-0.15714	0.0895608	0.154131	0.411189	-0.300543	-0.393651	-0.167655	-0.217354
ENSG00000172380.6	GNG12	purple	M6	-0.23233	-0.591142	0.128211	-0.755004	-0.619954	-0.262413	-0.399628	0.582384	0.0148799	0.509274	0.214481	0.606742	0.613603
ENSG00000162595.6	DIRAS3	salmon	M9	-0.674614	-0.425326	-0.201453	-0.020289	-0.101613	0.659833	0.398174	-0.0296055	-0.109553	0.321533	0.542418	0.114127	0.524529
ENSG00000116729.14	WLS	pink	M4	-0.160131	0.410828	0.861483	0.247644	-0.267965	-0.16398	-0.440181	-0.480742	-0.612028	-0.0513549	0.461221	0.127819	-0.175624
ENSG00000181163.13	NPM1	turquoise	M1	0.299501	-0.678034	-0.404245	-0.809346	-0.193105	-0.317867	-0.00683858	0.966746	0.71248	0.0927759	-0.328576	0.550422	0.488648
ENSG00000116754.13	SRSF11	purple	M6	-0.491753	-0.742876	0.0301797	-0.458078	-0.142428	0.316068	0.293224	0.557411	0.239554	0.503184	0.666689	0.801339	0.949819
ENSG00000118454.13	ANKRD13C	black	M3	0.205172	-0.479463	0.232343	-0.836902	-0.555576	-0.50887	-0.371145	0.786328	0.283268	0.149289	0.0232114	0.808263	0.519549
ENSG00000197568.14	HHLA3	pink	M4	-0.327695	0.0746609	0.542026	0.256696	-0.0850008	0.0884808	-0.132758	-0.226368	-0.371484	0.182388	0.612545	0.229973	0.137605
ENSG00000050628.20	PTGER3	black	M3	0.440771	-0.0648653	0.442411	-0.607303	-0.476459	-0.654936	-0.525402	0.512879	0.163528	-0.104117	-0.110143	0.627521	0.168966
ENSG00000132485.14	ZRANB2	black	M3	-0.120201	-0.621629	0.187086	-0.627946	-0.30806	-0.018792	0.0381773	0.711428	0.376699	0.152079	0.438067	0.945867	0.806344
ENSG00000172260.15	NEGR1	green	M13	-0.615811	-0.262693	0.0706186	0.0831427	-0.160954	0.503732	0.0625525	-0.141285	-0.195566	0.145867	0.616179	0.135058	0.379325
ENSG00000254685.6	FPGT	black	M3	-0.321428	-0.567764	0.296684	-0.528127	-0.349196	0.0415968	-0.138708	0.506627	0.118504	0.31417	0.558659	0.844557	0.773635
ENSG00000116791.14	CRYZ	black	M3	-0.0708948	-0.315579	0.182075	-0.376015	-0.259179	-0.200961	-0.220276	0.408928	0.184912	0.328206	0.263329	0.483008	0.427996
ENSG00000137547.8	MRPL15	turquoise	M1	0.284502	-0.659615	-0.255274	-0.850558	-0.281887	-0.39921	-0.124216	0.966651	0.633754	0.150977	-0.255521	0.638665	0.518364
ENSG00000117054.13	ACADM	purple	M6	-0.413374	-0.624304	-0.0333678	-0.281834	-0.0161236	0.212906	0.259617	0.430737	0.0879394	0.488652	0.485822	0.533396	0.664235
ENSG00000153827.13	TRIP12	turquoise	M1	0.0624575	-0.803995	-0.248733	-0.77448	-0.20105	-0.129321	0.000468153	0.966639	0.67576	0.179232	0.0367827	0.772525	0.734037
ENSG00000136897.8	MRPL50	turquoise	M1	0.244902	-0.659921	-0.129137	-0.872341	-0.368883	-0.393864	-0.171214	0.966513	0.609345	0.132169	-0.124601	0.750239	0.590035
ENSG00000036549.13	AC118549.1	black	M3	0.0709163	-0.62732	0.132406	-0.731004	-0.349955	-0.147501	-0.0318935	0.822305	0.42961	0.040771	0.251483	0.946607	0.729182
ENSG00000077254.14	USP33	black	M3	-0.233461	-0.593581	0.281716	-0.488875	-0.216664	0.0486347	0.0604849	0.613834	0.29197	0.26983	0.607012	0.935802	0.824848
ENSG00000180488.15	MIGA1	black	M3	-0.175483	-0.669478	0.198394	-0.670415	-0.405579	-0.102672	-0.025904	0.726639	0.240229	0.366584	0.450674	0.903197	0.807212
ENSG00000162614.18	NEXN	salmon	M9	-0.819124	-0.455889	-0.215436	0.194139	0.104457	0.798503	0.283049	-0.0968341	-0.125937	0.45943	0.712297	0.0819222	0.571298
ENSG00000105849.6	TWISTNB	turquoise	M1	0.360315	-0.609705	-0.261518	-0.795353	-0.21966	-0.349666	-0.0357183	0.966248	0.710618	0.0249963	-0.244487	0.654661	0.504944
ENSG00000162616.9	DNAJB4	greenyellow	M7	-0.754217	-0.672735	-0.21454	-0.204685	-0.0721259	0.519462	0.265332	0.261409	0.0588599	0.736369	0.636803	0.343089	0.796648
ENSG00000137960.6	GIPC2	pink	M4	0.137618	0.272329	0.880513	-0.0881187	-0.355895	-0.464905	-0.474345	-0.0704096	-0.396421	-0.0653043	0.286625	0.454953	-0.0427397
ENSG00000122420.10	PTGFR	purple	M6	-0.523638	-0.672446	0.0147806	-0.511046	-0.421219	0.173306	-0.0176371	0.412725	-0.0446777	0.480109	0.487249	0.537588	0.718923
ENSG00000162623.16	TYW3	turquoise	M1	0.361598	-0.594558	-0.160257	-0.841322	-0.293314	-0.424012	-0.152982	0.966089	0.697564	-0.026682	-0.227111	0.715431	0.503494
ENSG00000198604.11	BAZ1A	turquoise	M1	0.240212	-0.695803	-0.296679	-0.805312	-0.173681	-0.252296	0.0917699	0.965992	0.698454	0.143516	-0.170814	0.682828	0.601396
ENSG00000164134.13	NAA15	turquoise	M1	0.393866	-0.590286	-0.200115	-0.829651	-0.277771	-0.382874	-0.109334	0.965937	0.68558	-0.0750378	-0.258136	0.699504	0.488867
ENSG00000117114.19	ADGRL2	purple	M6	-0.785782	-0.706925	-0.116069	-0.174106	-0.0866693	0.629626	0.306194	0.250334	-0.0606631	0.619061	0.780356	0.456752	0.852587
ENSG00000142875.19	PRKACB	salmon	M9	-0.717313	-0.670564	-0.440691	0.0034633	0.255371	0.767057	0.739756	0.220313	0.241349	0.612351	0.621505	0.224243	0.765012
ENSG00000150768.15	DLAT	turquoise	M1	0.326957	-0.615938	-0.133466	-0.853765	-0.335509	-0.432429	-0.215191	0.965937	0.58568	0.0722202	-0.192131	0.719701	0.524235
ENSG00000120705.13	ETF1	turquoise	M1	0.383174	-0.606648	-0.230098	-0.83052	-0.287812	-0.397485	-0.106373	0.96593	0.658263	-0.0170418	-0.282677	0.653876	0.465919
ENSG00000152332.16	UHMK1	turquoise	M1	0.0237428	-0.832592	-0.400998	-0.787415	-0.158975	-0.0858236	0.0894773	0.965906	0.685001	0.327008	-0.0284293	0.665065	0.748594
ENSG00000117155.16	SSX2IP	greenyellow	M7	-0.33826	-0.669154	-0.216814	-0.582458	-0.262166	-0.0720129	0.0202526	0.529801	0.0796938	0.814489	0.0970667	0.347821	0.578272
ENSG00000171202.7	TMEM126A	turquoise	M1	0.242958	-0.709538	-0.366117	-0.78322	-0.186059	-0.253573	-0.0546947	0.9659	0.669242	0.129021	-0.21459	0.602119	0.55534
ENSG00000153898.13	MCOLN2	yellow	M12	-0.374662	-0.34799	-0.402038	0.185392	0.460398	0.654238	0.922442	0.0689875	0.239579	0.309898	0.358241	0.0541096	0.421458
ENSG00000097096.9	SYDE2	pink	M4	0.573079	0.865415	0.680118	0.17286	-0.330782	-0.615855	-0.667809	-0.469141	-0.395784	-0.644397	-0.306093	-0.219254	-0.733093
ENSG00000162642.14	C1orf52	black	M3	0.124972	-0.50719	0.142227	-0.595278	-0.233385	-0.187488	0.0266243	0.768969	0.489172	0.11615	0.256671	0.873572	0.668567
ENSG00000165934.12	CPSF2	turquoise	M1	0.224948	-0.692228	-0.182416	-0.864126	-0.300811	-0.316421	-0.0637546	0.965497	0.60124	0.0986636	-0.129767	0.749546	0.610443
ENSG00000124207.17	CSE1L	turquoise	M1	0.237505	-0.674146	-0.187466	-0.880807	-0.343724	-0.394335	-0.194993	0.965101	0.602293	0.155688	-0.184744	0.69975	0.568031
ENSG00000168092.14	PAFAH1B2	turquoise	M1	0.0349265	-0.828362	-0.369722	-0.81438	-0.214693	-0.145613	0.00852522	0.964805	0.62897	0.341555	-0.0554905	0.656976	0.716146
ENSG00000148229.13	POLE3	turquoise	M1	0.292946	-0.679804	-0.341733	-0.756053	-0.136375	-0.306362	0.00900247	0.964732	0.67032	0.151965	-0.252008	0.59554	0.507192
ENSG00000122417.15	ODF2L	salmon	M9	-0.681869	-0.653542	-0.315002	-0.0884905	0.126244	0.751626	0.676923	0.24631	0.178523	0.490082	0.674608	0.371634	0.824068
ENSG00000090060.18	PAPOLA	turquoise	M1	0.0905272	-0.769069	-0.256145	-0.812887	-0.242843	-0.153414	0.00997798	0.964722	0.715222	0.148871	0.0026853	0.766524	0.732299
ENSG00000198843.13	SELENOT	turquoise	M1	0.0585444	-0.823282	-0.445746	-0.783899	-0.14653	-0.0886223	0.131991	0.964713	0.717793	0.245957	-0.0882077	0.628496	0.706801
ENSG00000197170.10	PSMD12	turquoise	M1	0.390023	-0.587798	-0.24508	-0.848694	-0.30488	-0.409555	-0.113252	0.964585	0.686976	-0.0211491	-0.300855	0.642536	0.470737
ENSG00000091140.14	DLD	turquoise	M1	0.117615	-0.740197	-0.106556	-0.82953	-0.289976	-0.273576	-0.0639421	0.96455	0.587801	0.213447	0.0311998	0.826788	0.703571
ENSG00000143013.13	LMO4	purple	M6	-0.227534	-0.449648	0.182355	-0.466317	-0.348245	-0.187935	-0.272759	0.429662	-0.0328562	0.583205	0.294785	0.504648	0.509987
ENSG00000065243.20	PKN2	black	M3	-0.132115	-0.700308	0.103409	-0.678767	-0.291997	-0.0612129	-0.0210089	0.78155	0.48788	0.238921	0.395092	0.925091	0.836271
ENSG00000113569.16	NUP155	turquoise	M1	0.314617	-0.610474	-0.104015	-0.867384	-0.34594	-0.433463	-0.203043	0.964545	0.597067	0.102371	-0.164907	0.746887	0.54981
ENSG00000138430.16	OLA1	turquoise	M1	0.341151	-0.610034	-0.171068	-0.850046	-0.311441	-0.421298	-0.192248	0.964536	0.641676	0.0221119	-0.224649	0.700272	0.511831
ENSG00000213516.10	RBMXL1	black	M3	0.0309454	-0.557434	0.117514	-0.603915	-0.261056	-0.0652352	0.104362	0.717104	0.463951	-0.0228622	0.280982	0.86515	0.67942
ENSG00000117226.12	GBP3	purple	M6	-0.441995	-0.600511	-0.302188	-0.120549	0.16451	0.436064	0.437845	0.340251	0.277306	0.430348	0.39861	0.304694	0.597406
ENSG00000117228.10	GBP1	yellow	M12	-0.430559	-0.560201	-0.508787	-0.050769	0.272882	0.521714	0.76755	0.260363	0.29988	0.409682	0.244265	0.100287	0.493462
ENSG00000180817.12	PPA1	turquoise	M1	0.380713	-0.606633	-0.284215	-0.838304	-0.277019	-0.411971	-0.0814575	0.96427	0.644959	0.0387426	-0.332222	0.600227	0.448552
ENSG00000162654.9	GBP4	red	M2	0.0104058	0.234095	0.310387	0.339212	0.151257	0.00292607	0.215187	-0.21719	-0.0980407	-0.119417	0.238974	0.0141543	-0.142691
ENSG00000123268.9	ATF1	turquoise	M1	0.21333	-0.696562	-0.254173	-0.856552	-0.293207	-0.322375	-0.061422	0.964093	0.604564	0.186864	-0.167762	0.670888	0.590651
ENSG00000183347.14	GBP6	salmon	M9	-0.539731	-0.266078	-0.274975	0.162225	0.135177	0.725607	0.773287	-0.119236	-0.0377736	0.181919	0.468932	0.00138568	0.402845
ENSG00000108010.12	GLRX3	turquoise	M1	0.258007	-0.680603	-0.257665	-0.841686	-0.289069	-0.295198	0.00281344	0.964063	0.586875	0.102136	-0.177136	0.683224	0.577121
ENSG00000154813.10	DPH3	turquoise	M1	0.225685	-0.722328	-0.404159	-0.756858	-0.168253	-0.182501	0.0111865	0.964051	0.735542	0.0769401	-0.190695	0.602483	0.576076
ENSG00000143183.16	TMCO1	turquoise	M1	0.0133206	-0.826867	-0.262547	-0.833048	-0.278097	-0.187669	-0.00572847	0.963986	0.606807	0.318055	0.00670461	0.731605	0.733944
ENSG00000162664.17	ZNF326	black	M3	-0.0010678	-0.585979	0.113849	-0.62947	-0.264597	-0.0433055	0.0923356	0.75853	0.509409	0.0470526	0.35664	0.923693	0.776944
ENSG00000122482.21	ZNF644	purple	M6	-0.226969	-0.836322	-0.18057	-0.664331	-0.197063	0.142277	0.17732	0.824187	0.559846	0.293719	0.353342	0.8172	0.902971
ENSG00000182004.13	SNRPE	turquoise	M1	0.354486	-0.629772	-0.332437	-0.770894	-0.161918	-0.310469	0.0471994	0.963825	0.698736	0.0290915	-0.278738	0.608251	0.489062
ENSG00000069702.11	TGFBR3	red	M2	0.454426	0.590887	0.684431	0.076191	-0.389147	-0.624512	-0.692744	-0.243031	-0.316267	-0.441527	-0.135482	-0.00515088	-0.510997
ENSG00000174842.17	GLMN	purple	M6	-0.222331	-0.839717	-0.177603	-0.705607	-0.166039	0.0626096	0.255486	0.82593	0.53711	0.383579	0.292226	0.800411	0.881296
ENSG00000122484.9	RPAP2	black	M3	-0.156363	-0.700891	-0.0322275	-0.474605	-0.0641815	0.20923	0.208609	0.716473	0.467292	0.133304	0.454824	0.858771	0.833955
ENSG00000067208.14	EVI5	purple	M6	-0.387991	-0.801317	-0.0478235	-0.576581	-0.209145	0.213958	0.219002	0.685169	0.361559	0.426751	0.527186	0.819023	0.937212
ENSG00000138663.9	COPS4	turquoise	M1	0.0162526	-0.821603	-0.270792	-0.80245	-0.224594	-0.171655	0.0206377	0.963787	0.596661	0.373374	0.0184164	0.726938	0.741129
ENSG00000154511.12	DIPK1A	greenyellow	M7	-0.87197	-0.61951	-0.295464	-0.04324	-0.0417748	0.617113	0.382529	0.0280797	-0.239954	0.809883	0.570417	0.0567099	0.603526
ENSG00000143033.18	MTF2	purple	M6	-0.32084	-0.719356	-0.00504598	-0.431163	-0.0204698	0.283497	0.387272	0.634309	0.459217	0.299689	0.56979	0.840813	0.892092
ENSG00000082213.18	C5orf22	turquoise	M1	0.18208	-0.699183	-0.142308	-0.851174	-0.326538	-0.2936	-0.109262	0.963578	0.586925	0.173231	-0.0455841	0.783746	0.662606
ENSG00000122483.17	CCDC18	greenyellow	M7	-0.479975	-0.687119	-0.441784	-0.276138	0.15021	0.376014	0.454929	0.443459	0.312714	0.73175	0.316161	0.296764	0.721212
ENSG00000120699.13	EXOSC8	turquoise	M1	0.129526	-0.731859	-0.107663	-0.816916	-0.287504	-0.248439	-0.0294162	0.96356	0.607236	0.192567	0.0386444	0.838639	0.710583
ENSG00000137942.16	FNBP1L	black	M3	0.184299	-0.223284	0.523733	-0.439598	-0.314062	-0.347515	-0.415517	0.501774	0.190013	-0.149715	0.291731	0.827579	0.396399
ENSG00000137936.18	BCAR3	red	M2	0.260724	0.881486	0.631451	0.611576	0.000892868	-0.167654	-0.384994	-0.736239	-0.540223	-0.494412	0.0329547	-0.353084	-0.678516
ENSG00000119446.14	RBM18	turquoise	M1	0.0536786	-0.795072	-0.189175	-0.792556	-0.233252	-0.157099	-0.00794656	0.963531	0.637721	0.2088	0.0733458	0.810602	0.750354
ENSG00000134153.10	EMC7	turquoise	M1	0.231946	-0.702888	-0.243845	-0.807465	-0.26857	-0.336284	-0.11378	0.963238	0.606314	0.130251	-0.172052	0.657443	0.543646
ENSG00000137962.13	ARHGAP29	pink	M4	0.026359	-0.0516245	0.783359	-0.280771	-0.413214	-0.347843	-0.442069	0.227165	-0.104901	-0.0333005	0.473779	0.747432	0.306713
ENSG00000117528.13	ABCD3	black	M3	-0.0218037	-0.375169	0.511648	-0.64653	-0.515736	-0.360596	-0.274176	0.53636	-0.0234735	0.246123	0.34909	0.854438	0.557443
ENSG00000117525.14	F3	greenyellow	M7	-0.750677	-0.195588	0.0886068	0.229206	-0.00960874	0.564007	0.274483	-0.263793	-0.362417	0.600412	0.715873	0.0388662	0.418222
ENSG00000143036.17	SLC44A3	pink	M4	-0.090166	0.0320862	0.763435	-0.331337	-0.660217	-0.256572	-0.4682	0.0102354	-0.455576	-0.0803626	0.42864	0.547841	0.213693
ENSG00000102753.10	KPNA3	turquoise	M1	0.0719658	-0.799877	-0.321935	-0.835994	-0.263104	-0.182969	-0.0567634	0.963226	0.63254	0.272541	-0.0661905	0.680101	0.697525
ENSG00000122481.17	RWDD3	pink	M4	-0.106976	-0.0639421	0.569423	-0.190391	-0.273014	-0.11956	-0.222029	0.126126	-0.170941	0.0928158	0.458931	0.584727	0.33136
ENSG00000117569.18	PTBP2	purple	M6	-0.310032	-0.648298	-0.0264587	-0.385784	-0.0682619	0.367848	0.342554	0.567942	0.39665	0.18632	0.592579	0.792194	0.877556
ENSG00000205339.10	IPO7	turquoise	M1	0.361494	-0.619543	-0.283534	-0.833599	-0.286619	-0.365597	-0.159682	0.96319	0.665875	-0.0134545	-0.296002	0.620619	0.476089
ENSG00000162627.17	SNX7	greenyellow	M7	-0.72562	-0.503123	-0.049543	0.0107988	-0.077073	0.424433	0.154067	0.0248995	-0.263034	0.666674	0.605155	0.150111	0.496654
ENSG00000117600.12	PLPPR4	salmon	M9	-0.719416	-0.367213	-0.0123754	0.118967	0.0401838	0.728119	0.514117	-0.0637018	-0.0878926	0.363785	0.808763	0.281325	0.643599
ENSG00000099260.11	PALMD	pink	M4	0.022873	0.348481	0.949918	0.0404655	-0.391355	-0.344299	-0.510636	-0.233095	-0.500708	-0.142966	0.430118	0.382631	-0.0729347
ENSG00000156869.13	FRRS1	pink	M4	-0.235004	-0.130858	0.693513	-0.265585	-0.411538	-0.131494	-0.241409	0.108646	-0.367656	0.261372	0.580439	0.647977	0.407008
ENSG00000162688.17	AGL	black	M3	-0.164518	-0.587201	0.317527	-0.586177	-0.41202	-0.115316	-0.178023	0.629856	0.124205	0.285487	0.48278	0.886707	0.720566
ENSG00000117620.15	SLC35A3	black	M3	0.0510791	-0.385942	0.375503	-0.622584	-0.462876	-0.144204	-0.124294	0.58277	0.160349	-0.011553	0.364575	0.905836	0.634575
ENSG00000156876.10	SASS6	purple	M6	-0.532064	-0.85424	-0.243931	-0.60199	-0.282423	0.260783	0.154562	0.615692	0.262428	0.659016	0.428106	0.592708	0.903873
ENSG00000122435.10	TRMT13	black	M3	0.173854	-0.618403	0.0259638	-0.805701	-0.347017	-0.273104	-0.155252	0.875771	0.535629	-0.00604201	0.0505508	0.863984	0.647249
ENSG00000137992.14	DBT	black	M3	0.0326498	-0.228687	0.63756	-0.497077	-0.485931	-0.291825	-0.331687	0.408951	-0.0658323	-0.0296217	0.428793	0.85206	0.465745
ENSG00000137996.12	RTCA	purple	M6	-0.331559	-0.81998	-0.213732	-0.659334	-0.240486	0.209297	0.317658	0.725255	0.411555	0.425888	0.359467	0.731217	0.905805
ENSG00000079335.20	CDC14A	pink	M4	0.0316984	0.148711	0.701292	-0.134384	-0.230339	-0.191208	-0.0654	0.0167926	-0.1252	-0.0215101	0.432358	0.568682	0.234033
ENSG00000162692.12	VCAM1	yellow	M12	-0.349639	-0.306386	-0.448306	0.181464	0.310136	0.593003	0.773103	0.0392417	0.258532	0.172657	0.252888	-0.0537757	0.3074
ENSG00000162694.14	EXTL2	greenyellow	M7	-0.810286	-0.714116	-0.148361	-0.179682	-0.0781552	0.518201	0.297064	0.224603	-0.127375	0.848337	0.673247	0.345373	0.768127
ENSG00000174010.9	KLHL15	turquoise	M1	0.293321	-0.648541	-0.235658	-0.803587	-0.21358	-0.348621	-0.0291038	0.963138	0.741393	0.0510349	-0.200389	0.684616	0.537234
ENSG00000198000.12	NOL8	turquoise	M1	0.193903	-0.7035	-0.20596	-0.783766	-0.216866	-0.196865	0.0410902	0.963136	0.731933	0.0208002	-0.0317698	0.790438	0.672497
ENSG00000135070.15	ISCA1	turquoise	M1	0.0826014	-0.779776	-0.317193	-0.833597	-0.263757	-0.197895	-0.0194567	0.963091	0.649507	0.268037	-0.0668529	0.678561	0.694685
ENSG00000060718.22	COL11A1	salmon	M9	-0.478211	-0.178332	-0.402534	0.522448	0.626536	0.815115	0.574756	-0.265073	0.0866596	0.0144535	0.335078	-0.228534	0.151756
ENSG00000185946.16	RNPC3	pink	M4	0.00987041	0.111605	0.783941	-0.0473843	-0.215139	-0.109496	-0.143401	0.0286385	-0.11483	-0.205712	0.563084	0.674832	0.261623
ENSG00000240038.6	AMY2B	pink	M4	0.105409	0.357725	0.918118	0.130936	-0.202198	-0.240931	-0.296917	-0.194355	-0.320039	-0.321642	0.462255	0.466008	-0.0416623
ENSG00000122958.15	VPS26A	turquoise	M1	0.0693591	-0.774054	-0.169239	-0.875817	-0.351419	-0.255632	-0.103791	0.96294	0.556027	0.261982	0.00586306	0.779631	0.720858
ENSG00000134215.16	VAV3	pink	M4	0.145973	-0.200448	0.605245	-0.592982	-0.468966	-0.475226	-0.42998	0.481534	0.0893196	0.0335092	0.252382	0.839885	0.42456
ENSG00000162636.16	FAM102B	purple	M6	-0.400195	-0.7811	-0.272833	-0.413115	0.0251132	0.165607	0.269629	0.615173	0.406005	0.69446	0.342947	0.496459	0.755518
ENSG00000162639.16	HENMT1	yellow	M12	-0.486808	-0.680469	-0.501811	-0.00210822	0.52614	0.588605	0.83591	0.365541	0.448479	0.569505	0.393292	0.256517	0.664277
ENSG00000104442.10	ARMC1	turquoise	M1	0.129108	-0.730629	-0.0976621	-0.867863	-0.36491	-0.299931	-0.109651	0.962937	0.56024	0.169449	0.00159754	0.820451	0.685386
ENSG00000116266.11	STXBP3	black	M3	-0.0411862	-0.678129	0.0797053	-0.734559	-0.312322	-0.142693	-0.0331211	0.825441	0.554087	0.178806	0.290262	0.916672	0.794135
ENSG00000121957.14	GPSM2	black	M3	-0.182369	-0.300007	0.408111	-0.526123	-0.519844	-0.193843	-0.291635	0.307358	-0.279584	0.35856	0.337814	0.5876	0.468422
ENSG00000121940.15	CLCC1	black	M3	0.31522	-0.389464	0.160952	-0.543258	-0.236385	-0.244721	-0.0311044	0.738682	0.5312	-0.267595	0.125611	0.816393	0.482905
ENSG00000085433.15	WDR47	pink	M4	-0.12085	-0.061499	0.778114	-0.373573	-0.571885	-0.321635	-0.521441	0.107105	-0.400477	0.104052	0.436177	0.629571	0.284148
ENSG00000077232.18	DNAJC10	turquoise	M1	0.0537539	-0.827052	-0.422597	-0.723927	-0.0796414	-0.059524	0.173024	0.962857	0.764354	0.219361	-0.0383315	0.659526	0.713382
ENSG00000115866.11	DARS	turquoise	M1	0.0878711	-0.778778	-0.242551	-0.870993	-0.322827	-0.266472	-0.0740659	0.962822	0.541651	0.310064	-0.077286	0.706953	0.674519
ENSG00000116299.17	KIAA1324	magenta	M5	0.769106	0.652746	0.502338	-0.122266	-0.397064	-0.803044	-0.662462	-0.0893698	-0.00899795	-0.663224	-0.498684	-0.042408	-0.60141
ENSG00000151247.12	EIF4E	turquoise	M1	0.153819	-0.738947	-0.279226	-0.877284	-0.331317	-0.239139	-0.0376083	0.962813	0.583788	0.174136	-0.118184	0.69502	0.655212
ENSG00000143126.8	CELSR2	red	M2	0.314185	0.866568	0.678903	0.223756	-0.386284	-0.457034	-0.505681	-0.654273	-0.6864	-0.360978	-0.180141	-0.335207	-0.682379
ENSG00000134222.16	PSRC1	greenyellow	M7	-0.419252	0.208418	-0.0656824	0.547146	0.439917	0.316854	0.306407	-0.557683	-0.402773	0.548682	0.161422	-0.511425	-0.192432
ENSG00000134243.12	SORT1	pink	M4	-0.338597	0.341647	0.634936	0.522753	0.0284753	0.158267	-0.154635	-0.561762	-0.592519	0.0535303	0.591588	-0.0119065	-0.122865
ENSG00000091317.8	CMTM6	turquoise	M1	0.240554	-0.695402	-0.356407	-0.797055	-0.16517	-0.301481	0.00627974	0.962763	0.787443	0.116614	-0.241657	0.604494	0.545497
ENSG00000162650.16	ATXN7L2	magenta	M5	0.600188	0.140673	0.106388	0.0933294	0.304274	-0.244213	-0.0189577	0.266149	0.333813	-0.483667	-0.188218	0.238871	-0.165687
ENSG00000174151.14	CYB561D1	pink	M4	0.447871	0.768321	0.847788	0.204815	-0.284586	-0.541973	-0.486001	-0.44597	-0.490753	-0.529634	-0.0544347	-0.0251388	-0.59046
ENSG00000181754.7	AMIGO1	red	M2	0.677875	0.619501	0.604918	-0.0209117	-0.383815	-0.733547	-0.665548	-0.116253	-0.197232	-0.536235	-0.323683	0.0098414	-0.559699
ENSG00000125870.11	SNRPB2	turquoise	M1	0.0941928	-0.798535	-0.435617	-0.819619	-0.189036	-0.185805	0.0720191	0.962754	0.674754	0.30374	-0.171122	0.586146	0.645659
ENSG00000116337.17	AMPD2	tan	M8	0.464513	-0.296233	-0.445822	-0.375232	0.183558	-0.191523	0.15286	0.644109	0.941687	-0.287909	-0.42222	0.254884	0.171082
ENSG00000168765.17	GSTM4	red	M2	-0.0247061	0.71106	0.738892	0.502641	-0.0613403	-0.152269	-0.243515	-0.737174	-0.750588	-0.0768049	0.21951	-0.243286	-0.492784
ENSG00000134184.12	GSTM1	pink	M4	-0.0171145	0.166457	0.421486	0.0598321	-0.00925857	-0.158004	-0.0452144	-0.159081	-0.3353	0.0878087	0.161899	0.109886	-0.0759873
ENSG00000134202.10	GSTM3	pink	M4	-0.0666703	0.362645	0.839229	0.141962	-0.318717	-0.217078	-0.312193	-0.353145	-0.545368	-0.164747	0.391066	0.228446	-0.14389
ENSG00000184371.14	CSF1	magenta	M5	0.672291	0.123261	-0.038033	-0.167431	-0.0145592	-0.353316	-0.206737	0.329717	0.238318	-0.420979	-0.413728	0.11061	-0.198464
ENSG00000168710.18	AHCYL1	black	M3	-0.0132841	-0.548474	0.240016	-0.582185	-0.317287	-0.276216	-0.208909	0.678849	0.220793	0.21847	0.270459	0.78129	0.56505
ENSG00000143093.15	STRIP1	red	M2	0.597268	0.661432	0.727672	0.188337	-0.166002	-0.439541	-0.451455	-0.23943	-0.266586	-0.707435	-0.0640743	0.141803	-0.470888
ENSG00000197106.7	SLC6A17	pink	M4	0.327146	0.569097	0.945613	-0.0358962	-0.496553	-0.590722	-0.611161	-0.274336	-0.498767	-0.386995	0.0809718	0.232835	-0.344444
ENSG00000116396.14	KCNC4	pink	M4	0.476579	0.742075	0.896049	0.161267	-0.337286	-0.521678	-0.532162	-0.371467	-0.438015	-0.60516	0.0158933	0.119427	-0.494044
ENSG00000162775.16	RBM15	black	M3	0.417744	0.0170067	0.55947	-0.316381	-0.165061	-0.372512	-0.110619	0.370335	0.178193	-0.325314	0.138426	0.722099	0.190152
ENSG00000161654.9	LSM12	turquoise	M1	0.103332	-0.78301	-0.405018	-0.797586	-0.191217	-0.171854	0.0540008	0.962587	0.717783	0.27026	-0.126233	0.620962	0.665719
ENSG00000177272.9	KCNA3	yellow	M12	-0.382075	-0.156094	-0.459423	0.389087	0.533019	0.708571	0.953191	-0.182034	0.141702	0.159545	0.245513	-0.227199	0.180938
ENSG00000143119.14	CD53	tan	M8	0.155083	-0.615646	-0.542229	-0.502033	0.160292	-0.00732113	0.26753	0.784766	0.961691	-7.75672e-05	-0.191793	0.412612	0.498627
ENSG00000106591.4	MRPL32	turquoise	M1	0.035529	-0.81085	-0.316177	-0.83018	-0.252762	-0.119695	0.112009	0.962515	0.627304	0.280239	-0.00232961	0.729329	0.758674
ENSG00000156171.14	DRAM2	purple	M6	-0.577838	-0.810662	-0.26106	-0.262884	0.203486	0.507972	0.428018	0.513449	0.414194	0.587526	0.615028	0.588433	0.920642
ENSG00000134255.14	CEPT1	black	M3	0.0402332	-0.704077	-0.05942	-0.713454	-0.188868	-0.0861695	0.0438952	0.88298	0.629607	0.0993986	0.209846	0.884423	0.783611
ENSG00000162777.17	DENND2D	black	M3	0.236717	-0.447079	-0.109555	-0.465573	0.019197	-0.0382042	0.402559	0.675901	0.568007	-0.140256	0.0291618	0.644837	0.480338
ENSG00000124789.11	NUP153	turquoise	M1	0.259205	-0.660059	-0.14695	-0.862843	-0.327256	-0.334282	-0.107013	0.962492	0.598302	0.0931373	-0.118541	0.760361	0.602906
ENSG00000085465.12	OVGP1	red	M2	-0.0555493	0.476176	0.63254	0.637489	0.240235	0.19204	0.0208884	-0.539345	-0.426507	-0.29132	0.49168	0.0393672	-0.227143
ENSG00000107651.13	SEC23IP	turquoise	M1	0.0179022	-0.838972	-0.31915	-0.755953	-0.156129	-0.0882545	0.0699373	0.962383	0.670616	0.284576	0.028093	0.726141	0.746166
ENSG00000127870.17	RNF6	turquoise	M1	0.0562502	-0.792715	-0.189554	-0.851622	-0.326761	-0.197706	-0.0603937	0.962198	0.558699	0.240467	0.0365239	0.783485	0.738367
ENSG00000086189.10	DIMT1	turquoise	M1	0.405449	-0.579983	-0.25402	-0.83998	-0.279964	-0.428467	-0.173593	0.962195	0.686081	-0.00289922	-0.322845	0.621673	0.451926
ENSG00000134987.11	WDR36	turquoise	M1	0.382295	-0.586783	-0.149192	-0.832741	-0.302969	-0.428115	-0.216955	0.962177	0.646468	-0.0376186	-0.234649	0.705983	0.480659
ENSG00000163938.17	GNL3	turquoise	M1	0.383564	-0.612136	-0.297285	-0.8039	-0.220962	-0.360207	-0.0164903	0.962086	0.673623	-0.0113193	-0.315108	0.617649	0.459017
ENSG00000047621.12	C12orf4	turquoise	M1	0.0471651	-0.819851	-0.367578	-0.748364	-0.133011	-0.0709601	0.115288	0.961947	0.746989	0.187553	-0.0110779	0.706111	0.730695
ENSG00000059769.20	DNAJC25	turquoise	M1	0.201611	-0.712008	-0.376122	-0.826943	-0.241544	-0.241784	-0.000460147	0.961842	0.716264	0.135423	-0.204741	0.613182	0.595321
ENSG00000143079.15	CTTNBP2NL	black	M3	-0.268549	-0.403316	0.480268	-0.416452	-0.403306	0.0679197	-0.126477	0.379915	-0.0680302	0.177813	0.666629	0.861555	0.704297
ENSG00000007341.19	ST7L	black	M3	0.241104	-0.236855	0.508161	-0.59542	-0.428121	-0.412253	-0.371534	0.556254	0.207276	-0.202009	0.193549	0.865666	0.416944
ENSG00000153147.6	SMARCA5	turquoise	M1	0.0635121	-0.798429	-0.319653	-0.769364	-0.170665	-0.121607	0.0977099	0.961773	0.698111	0.231365	-0.0122482	0.717735	0.721567
ENSG00000155363.18	MOV10	pink	M4	-0.0522215	0.61151	0.839104	0.470885	-0.0519709	-0.0859199	-0.207239	-0.630633	-0.664045	-0.135764	0.398367	-0.0114557	-0.330691
ENSG00000155366.16	RHOC	grey	M0	0.258406	0.0121545	-0.280832	-0.00991268	0.0632551	-0.196515	-0.344789	0.1268	0.0644655	0.145711	-0.371694	-0.254732	-0.199926
ENSG00000155367.15	PPM1J	red	M2	0.42361	0.835051	0.718307	0.141139	-0.394388	-0.516334	-0.513164	-0.53126	-0.577483	-0.436253	-0.187601	-0.18966	-0.624365
ENSG00000198799.12	LRIG2	pink	M4	-0.0466532	0.0140982	0.792041	-0.129778	-0.322229	-0.112253	-0.208996	0.0699401	-0.205236	-0.183891	0.579919	0.715117	0.297197
ENSG00000081026.19	MAGI3	red	M2	0.254463	0.83705	0.726604	0.283545	-0.376161	-0.383413	-0.542913	-0.645001	-0.688185	-0.309854	-0.0241063	-0.261134	-0.594751
ENSG00000116793.16	PHTF1	purple	M6	-0.407639	-0.693355	-0.675181	0.0577817	0.628958	0.697672	0.724822	0.391977	0.620492	0.356189	0.303919	0.184544	0.625233
ENSG00000081019.13	RSBN1	black	M3	0.337498	-0.351971	0.292316	-0.759896	-0.483542	-0.475392	-0.190614	0.716268	0.397591	-0.22434	-0.0057128	0.823609	0.416013
ENSG00000134242.16	PTPN22	yellow	M12	-0.484079	-0.652828	-0.66364	-0.0135535	0.454176	0.692434	0.882787	0.314916	0.541923	0.399176	0.301602	0.128972	0.626431
ENSG00000134262.13	AP4B1	black	M3	-0.327096	-0.369801	0.316066	-0.0568807	0.0112975	0.327123	0.32284	0.229571	-0.0112383	0.153891	0.69855	0.678245	0.597466
ENSG00000147224.11	PRPS1	turquoise	M1	0.31791	-0.657677	-0.390923	-0.781694	-0.201962	-0.314575	-0.0339876	0.961535	0.696764	0.106102	-0.305806	0.543596	0.481682
ENSG00000163349.22	HIPK1	black	M3	0.0221591	-0.657766	0.165512	-0.754759	-0.375373	-0.23155	-0.173963	0.837053	0.444291	0.15724	0.270928	0.939286	0.739706
ENSG00000145014.17	TMEM44	blue	M10	-0.173063	0.397313	-0.100939	0.940132	0.823173	0.48012	0.38589	-0.663389	-0.219407	-0.0338149	0.125541	-0.58958	-0.428002
ENSG00000197323.12	TRIM33	black	M3	0.0490192	-0.546	0.214699	-0.731643	-0.371092	-0.19965	-0.102161	0.752402	0.438881	0.0368444	0.27718	0.939586	0.719787
ENSG00000100568.11	VTI1B	turquoise	M1	0.12758	-0.743766	-0.222115	-0.816781	-0.276551	-0.238039	-0.133035	0.9615	0.603013	0.210942	-0.0342883	0.732956	0.677375
ENSG00000175984.15	DENND2C	pink	M4	-0.324001	-0.0615277	0.621632	-0.225524	-0.536842	0.0402914	-0.0979113	-0.0435891	-0.463188	0.133204	0.594845	0.516893	0.379314
ENSG00000151304.5	SRFBP1	turquoise	M1	0.365043	-0.613595	-0.250921	-0.804914	-0.255797	-0.378579	-0.101232	0.961434	0.699822	-0.0237422	-0.277052	0.646701	0.46992
ENSG00000136628.18	EPRS	turquoise	M1	0.251374	-0.685325	-0.312544	-0.826958	-0.277301	-0.354365	-0.0913263	0.961401	0.643723	0.160747	-0.252254	0.599464	0.520377
ENSG00000075336.12	TIMM21	turquoise	M1	0.332969	-0.602659	-0.0755265	-0.873119	-0.370594	-0.438674	-0.208377	0.961281	0.595243	0.0330884	-0.157469	0.766893	0.540461
ENSG00000134198.10	TSPAN2	greenyellow	M7	-0.375084	-0.32255	0.178592	-0.214156	-0.287457	-0.0685678	-0.249243	0.149201	-0.282769	0.723712	0.319573	0.248872	0.341867
ENSG00000113643.9	RARS	turquoise	M1	0.0458832	-0.807267	-0.295266	-0.855837	-0.280025	-0.197329	0.0278031	0.961267	0.570162	0.326778	-0.0578375	0.700578	0.709581
ENSG00000111832.13	RWDD1	turquoise	M1	0.259927	-0.661027	-0.129884	-0.821136	-0.33207	-0.324985	-0.095196	0.961228	0.598525	0.0353245	-0.0920551	0.768108	0.583874
ENSG00000163393.13	SLC22A15	green	M13	-0.689777	-0.374285	0.159797	0.0950397	0.0596451	0.672256	0.345669	-0.0282227	-0.0698812	0.273876	0.877842	0.449009	0.676021
ENSG00000173212.4	MAB21L3	pink	M4	-0.000334587	0.213251	0.825468	-0.206492	-0.518023	-0.303729	-0.460834	-0.102169	-0.442692	-0.102346	0.350772	0.476905	0.0889594
ENSG00000067334.14	DNTTIP2	turquoise	M1	0.391915	-0.57738	-0.206597	-0.799413	-0.248581	-0.369661	-0.0500566	0.961199	0.735302	-0.0773595	-0.230497	0.694409	0.498001
ENSG00000117500.13	TMED5	turquoise	M1	0.125415	-0.773426	-0.473979	-0.783723	-0.139468	-0.155402	0.0532311	0.961163	0.735439	0.240377	-0.178547	0.562831	0.637441
ENSG00000143061.17	IGSF3	pink	M4	0.21169	0.657562	0.785532	0.0512194	-0.478234	-0.444876	-0.431425	-0.474106	-0.694889	-0.252774	0.0214104	-0.0451834	-0.429394
ENSG00000116824.5	CD2	yellow	M12	-0.477554	-0.468558	-0.415427	-0.0236397	0.209465	0.571107	0.819788	0.148017	0.171799	0.492748	0.345582	0.0904629	0.520479
ENSG00000134247.10	PTGFRN	greenyellow	M7	-0.518488	-0.568161	-0.496075	-0.232493	-0.00176564	0.276424	0.161691	0.166799	-0.137446	0.729706	0.0168728	-0.120434	0.341312
ENSG00000134256.12	CD101	black	M3	0.0954644	-0.362621	0.202237	-0.54022	-0.275016	-0.233063	-0.0577673	0.524122	0.304538	-0.110678	0.0912474	0.66432	0.410257
ENSG00000116830.12	TTF2	black	M3	0.363588	-0.175598	0.451606	-0.502422	-0.276326	-0.419213	-0.213679	0.572367	0.19131	-0.02828	0.141326	0.799625	0.366874
ENSG00000114686.9	MRPL3	turquoise	M1	0.376089	-0.604055	-0.327575	-0.840641	-0.259718	-0.396556	-0.102275	0.96111	0.724243	0.00374424	-0.355566	0.58013	0.453324
ENSG00000183508.5	TENT5C	yellow	M12	-0.355875	-0.130439	-0.338911	0.397612	0.495698	0.70047	0.888128	-0.175359	0.127893	0.0146151	0.334892	-0.126211	0.200131
ENSG00000196505.11	GDAP2	black	M3	-0.0103885	-0.643094	0.117104	-0.722098	-0.301957	-0.140178	-0.0847774	0.808025	0.513661	0.124991	0.292109	0.935941	0.780415
ENSG00000120686.12	UFM1	turquoise	M1	0.0412773	-0.808243	-0.343124	-0.800106	-0.22359	-0.0995398	0.0330635	0.961109	0.678043	0.2516	-0.000587525	0.700442	0.747151
ENSG00000119772.16	DNMT3A	blue	M10	-0.0808746	0.675302	0.255525	0.940014	0.580805	0.327108	0.200798	-0.840667	-0.36832	-0.244245	0.190991	-0.533169	-0.547708
ENSG00000166326.7	TRIM44	turquoise	M1	0.356335	-0.596792	-0.231047	-0.747813	-0.173622	-0.32168	-0.0603924	0.961094	0.736213	0.020238	-0.178926	0.683176	0.529849
ENSG00000143067.5	ZNF697	greenyellow	M7	-0.516732	-0.527041	-0.614111	0.167103	0.556926	0.610782	0.502439	0.152393	0.255845	0.685541	0.264344	-0.0863752	0.451003
ENSG00000092621.12	PHGDH	red	M2	0.269769	0.902392	0.59815	0.35833	-0.249114	-0.376566	-0.428101	-0.738381	-0.65409	-0.327393	-0.188423	-0.457459	-0.736455
ENSG00000134250.20	NOTCH2	red	M2	0.568784	0.661368	0.667186	0.198454	-0.147779	-0.602388	-0.683536	-0.28798	-0.295154	-0.578675	-0.222589	-0.0619309	-0.634391
ENSG00000110321.17	EIF4G2	turquoise	M1	0.0753533	-0.813117	-0.399525	-0.820689	-0.238819	-0.156567	0.00755624	0.961066	0.595021	0.304605	-0.114122	0.615855	0.671431
ENSG00000273136.7	NBPF26	red	M2	-0.0519306	0.149064	0.322681	0.209253	0.00154706	0.0437538	-0.215536	-0.162685	-0.000179596	-0.191653	0.249877	0.119468	-0.0317005
ENSG00000198019.12	FCGR1B	tan	M8	0.312175	-0.433261	-0.348566	-0.538897	-0.0137181	-0.198524	0.0684854	0.72697	0.928723	-0.203859	-0.261059	0.427917	0.358339
ENSG00000171943.11	SRGAP2C	pink	M4	-0.146731	0.154725	0.763256	-0.11047	-0.34383	-0.195358	-0.255454	-0.117403	-0.360284	0.151893	0.499759	0.455171	0.199724
ENSG00000266338.6	NBPF15	salmon	M9	-0.473665	-0.154635	-0.130026	0.615508	0.676573	0.804573	0.702203	-0.239338	-0.0253237	0.159319	0.609685	0.0012662	0.258396
ENSG00000196369.11	SRGAP2B	pink	M4	-0.213145	0.37715	0.743874	0.320249	-0.16208	-0.0452452	-0.334024	-0.466322	-0.466753	-0.0262318	0.484394	0.115937	-0.110736
ENSG00000117262.19	GPR89A	black	M3	-0.100033	-0.504509	0.141155	-0.414998	-0.0703567	0.125813	0.212457	0.568464	0.346992	0.132814	0.464643	0.825732	0.732473
ENSG00000265491.5	RNF115	salmon	M9	-0.509776	-0.298134	0.147696	0.119709	0.0796234	0.637902	0.458055	0.0210058	0.0132459	0.0818334	0.827049	0.462424	0.61696
ENSG00000116459.11	ATP5PB	turquoise	M1	0.0619326	-0.812759	-0.358563	-0.817225	-0.202242	-0.180543	0.105381	0.960988	0.634879	0.300732	-0.0933963	0.652263	0.679219
ENSG00000186364.12	NUDT17	red	M2	0.327351	0.90321	0.65753	0.454548	-0.14197	-0.307291	-0.442247	-0.703007	-0.572319	-0.510491	-0.0750508	-0.343108	-0.700164
ENSG00000131788.16	PIAS3	pink	M4	-0.0545246	0.444678	0.874882	0.266981	-0.238181	-0.0268555	-0.271807	-0.411397	-0.57059	-0.18296	0.560969	0.28723	-0.0556615
ENSG00000198483.13	ANKRD35	red	M2	0.284009	0.85535	0.750193	0.260431	-0.334081	-0.43586	-0.507399	-0.656166	-0.635344	-0.394388	-0.0918308	-0.262226	-0.645757
ENSG00000143127.13	ITGA10	brown	M11	-0.181859	0.120514	-0.195097	0.756261	0.844373	0.430146	0.273385	-0.371467	-0.00596144	0.0484124	0.121773	-0.378351	-0.231878
ENSG00000131779.11	PEX11B	pink	M4	0.382574	0.254803	0.84358	-0.242972	-0.412703	-0.539422	-0.491626	0.103422	-0.180874	-0.44308	0.155868	0.586945	-0.044865
ENSG00000004961.15	HCCS	turquoise	M1	0.1702	-0.715768	-0.148395	-0.859537	-0.326677	-0.282187	-0.098666	0.960912	0.59496	0.0917141	-0.0531484	0.788437	0.654862
ENSG00000271601.4	LIX1L	red	M2	-0.296054	0.278159	0.135859	0.50936	0.121851	0.150243	-0.0743564	-0.491189	-0.290741	0.234177	0.25464	-0.37838	-0.220386
ENSG00000121851.13	POLR3GL	green	M13	-0.600565	-0.371113	0.108955	0.0938976	0.0806144	0.467094	0.281729	0.0727654	0.0966292	0.436113	0.779266	0.395307	0.624291
ENSG00000265972.5	TXNIP	pink	M4	0.22083	0.379383	0.71553	0.226673	0.00603419	-0.268266	-0.284591	-0.163476	-0.0195073	-0.443604	0.287929	0.307941	-0.16458
ENSG00000271425.8	NBPF10	black	M3	-0.130124	-0.0534278	0.504599	-0.0210205	-0.136146	0.144535	-0.171492	0.0236593	-0.207492	-0.11825	0.544451	0.526525	0.313046
ENSG00000268043.7	NBPF12	red	M2	-0.0130179	0.38912	0.474939	0.566537	0.363411	0.289778	0.263523	-0.424997	-0.274073	-0.305621	0.445902	0.0943298	-0.118784
ENSG00000131791.8	PRKAB2	green	M13	-0.64163	-0.388633	0.271917	0.0687258	-0.0295523	0.540113	0.12135	0.0403436	-0.112639	0.335941	0.906662	0.524514	0.667297
ENSG00000116128.11	BCL9	pink	M4	0.549008	0.404765	0.706255	-0.0843027	-0.32569	-0.567749	-0.602079	0.0480375	-0.0888111	-0.538734	-0.0180856	0.372267	-0.236172
ENSG00000265107.3	GJA5	grey	M0	-0.1918	-0.350482	-0.495288	0.0536331	0.349864	0.453501	0.616171	0.167676	0.339397	0.0687267	0.0556705	-0.0105175	0.263918
ENSG00000188092.14	GPR89B	black	M3	-0.131385	-0.407116	0.424142	-0.44405	-0.269079	0.0139621	0.0496791	0.468794	0.133643	0.0982743	0.564298	0.902997	0.68979
ENSG00000263956.6	NBPF11	pink	M4	-0.0152841	0.469842	0.819086	0.460962	0.0792555	0.0106806	-0.15896	-0.454626	-0.429384	-0.31989	0.512774	0.212455	-0.170184
ENSG00000270629.6	NBPF14	red	M2	0.0412282	0.135586	0.117719	0.425713	0.458052	0.227086	0.336047	-0.106467	0.176497	-0.160052	0.27396	0.0848058	-0.00509932
ENSG00000178104.19	PDE4DIP	salmon	M9	-0.767397	-0.194587	-0.249511	0.597235	0.4674	0.818726	0.333387	-0.422022	-0.236437	0.37882	0.538647	-0.295003	0.174735
ENSG00000269713.7	NBPF9	grey	M0	-0.0833068	-0.392547	-0.239957	0.120144	0.514048	0.351882	0.28926	0.284887	0.416634	-0.0957857	0.197123	0.255503	0.28452
ENSG00000286219.1	AC242843.1	black	M3	-0.289062	-0.406589	0.410673	-0.371008	-0.292223	0.174316	0.0910013	0.356328	0.0912123	0.0761868	0.683177	0.850497	0.726375
ENSG00000150337.13	FCGR1A	tan	M8	0.124775	-0.570071	-0.511754	-0.446404	0.189222	0.00107603	0.294342	0.710805	0.899482	0.0251229	-0.172453	0.359218	0.45606
ENSG00000203814.6	HIST2H2BF	greenyellow	M7	-0.531137	-0.560195	-0.155563	-0.309495	-0.0967859	0.107947	-0.0182407	0.287703	-0.0274774	0.891837	0.291428	0.219059	0.545404
ENSG00000183598.3	HIST2H3D	greenyellow	M7	-0.518342	-0.350012	-0.319637	0.0561894	0.243452	0.252073	0.256739	-0.0126497	-0.147821	0.901998	0.145228	-0.180584	0.242568
ENSG00000184678.10	HIST2H2BE	greenyellow	M7	-0.428863	-0.469737	0.220588	-0.409903	-0.312004	-0.0347662	-0.151286	0.309729	-0.155659	0.705545	0.443144	0.50543	0.587361
ENSG00000184260.5	HIST2H2AC	pink	M4	-0.332564	0.0728735	0.47683	0.0939513	-0.14805	-0.153148	-0.2862	-0.259563	-0.551386	0.518016	0.328015	0.0235728	-0.0132105
ENSG00000184270.5	HIST2H2AB	greenyellow	M7	-0.525623	-0.118763	-0.0956512	0.283431	0.249684	0.256447	0.283108	-0.255365	-0.342384	0.79288	0.257439	-0.259314	0.0788477
ENSG00000178096.9	BOLA1	red	M2	0.28222	0.889673	0.509568	0.49155	0.00238194	-0.299061	-0.202346	-0.742	-0.595314	-0.273941	-0.196688	-0.499854	-0.759163
ENSG00000198730.9	CTR9	turquoise	M1	0.269195	-0.662766	-0.178074	-0.823263	-0.271408	-0.328629	-0.109921	0.960851	0.648849	0.0307359	-0.147737	0.734703	0.569336
ENSG00000014914.21	MTMR11	pink	M4	0.1183	0.669507	0.866544	0.372967	-0.233101	-0.264425	-0.539616	-0.581586	-0.650895	-0.37784	0.247113	-0.0295756	-0.452817
ENSG00000264522.6	OTUD7B	pink	M4	0.59717	0.820478	0.692055	0.125403	-0.392124	-0.660721	-0.678509	-0.426682	-0.509096	-0.611301	-0.337192	-0.201945	-0.748845
ENSG00000136631.15	VPS45	black	M3	-0.244846	-0.634561	0.263846	-0.593334	-0.343109	0.000101298	-0.0212525	0.640397	0.186132	0.337553	0.554765	0.928869	0.835142
ENSG00000023902.14	PLEKHO1	brown	M11	-0.00182292	-0.18203	-0.663585	0.360495	0.845263	0.4381	0.596483	0.0976147	0.692244	-0.0307933	-0.127027	-0.233566	0.0471379
ENSG00000110713.17	NUP98	turquoise	M1	0.389261	-0.578354	-0.177539	-0.78142	-0.226614	-0.36589	-0.0925096	0.960695	0.747134	-0.0678106	-0.204629	0.715744	0.503448
ENSG00000115816.15	CEBPZ	turquoise	M1	0.378524	-0.594528	-0.178367	-0.800788	-0.27541	-0.364592	-0.0756707	0.960612	0.653848	-0.0589967	-0.215166	0.711355	0.495667
ENSG00000118292.9	C1orf54	salmon	M9	-0.776088	-0.533148	-0.48014	0.23717	0.433308	0.834725	0.694091	-0.012222	0.0538294	0.665618	0.541394	-0.021684	0.566232
ENSG00000159208.16	CIART	pink	M4	0.171373	0.208212	0.837159	-0.24822	-0.440004	-0.399813	-0.34496	0.055138	-0.232442	-0.165116	0.315914	0.60717	0.124272
ENSG00000265354.4	TIMM23	turquoise	M1	0.113652	-0.765564	-0.301525	-0.839148	-0.257004	-0.260287	0.00562648	0.960512	0.60109	0.298808	-0.121035	0.664531	0.648507
ENSG00000117360.13	PRPF3	black	M3	0.462498	-0.152118	0.355743	-0.426033	-0.224161	-0.326231	-0.116793	0.585706	0.391512	-0.438143	0.0833838	0.787628	0.300645
ENSG00000163125.15	RPRD2	pink	M4	-0.0335216	-0.0933099	0.748068	-0.247271	-0.382876	-0.219978	-0.329789	0.209169	-0.0907789	-0.0902343	0.54034	0.756632	0.352169
ENSG00000143374.17	TARS2	red	M2	0.513245	0.671375	0.758342	0.248497	-0.072252	-0.47168	-0.434598	-0.283388	-0.174955	-0.62056	-0.0166158	0.115407	-0.473119
ENSG00000143369.15	ECM1	greenyellow	M7	-0.622031	-0.0232695	0.116726	0.282475	-0.0673178	0.398626	0.0105306	-0.423412	-0.533315	0.418836	0.494745	-0.197931	0.106918
ENSG00000143382.14	ADAMTSL4	red	M2	0.566918	0.618272	-0.0166707	0.116062	-0.15582	-0.409319	-0.482705	-0.306521	-0.0655422	-0.557053	-0.671417	-0.549693	-0.728333
ENSG00000198836.10	OPA1	turquoise	M1	0.0925011	-0.764839	-0.195944	-0.81297	-0.250282	-0.213437	0.0846107	0.960506	0.598122	0.268381	0.013611	0.77193	0.711932
ENSG00000143420.18	ENSA	pink	M4	0.530525	0.764139	0.702986	-0.0415605	-0.492812	-0.659249	-0.489065	-0.36619	-0.474131	-0.515161	-0.290692	-0.087113	-0.59252
ENSG00000143457.11	GOLPH3L	pink	M4	-0.336046	-0.148664	0.658962	-0.0332023	-0.167791	0.0572817	-0.157429	0.0613149	-0.232852	0.241422	0.762349	0.647538	0.459067
ENSG00000143452.16	HORMAD1	black	M3	0.122048	-0.161937	0.0772174	-0.237819	-0.0428405	-0.161357	-0.135378	0.386944	0.444022	0.107337	0.117157	0.419786	0.326176
ENSG00000163131.11	CTSS	tan	M8	-0.0060255	-0.590965	-0.596585	-0.271759	0.382453	0.172543	0.438427	0.627198	0.927737	0.134914	-0.0780006	0.273313	0.475937
ENSG00000143387.13	CTSK	salmon	M9	-0.73824	-0.106817	-0.243045	0.694728	0.565346	0.818839	0.484636	-0.507988	-0.281719	0.370129	0.540119	-0.397907	0.0877149
ENSG00000143437.21	ARNT	pink	M4	-0.142057	-0.203388	0.605567	-0.208851	-0.285092	-0.169264	-0.438584	0.227508	-0.0886953	0.0564423	0.539339	0.659313	0.374555
ENSG00000143379.12	SETDB1	black	M3	0.336193	0.0130324	0.636104	-0.169506	-0.135168	-0.350293	-0.278681	0.30983	0.147795	-0.398465	0.248659	0.703229	0.138635
ENSG00000244462.8	RBM12	turquoise	M1	0.255982	-0.667764	-0.162827	-0.816939	-0.285425	-0.270586	-0.024423	0.960493	0.651959	0.0152819	-0.0947625	0.777924	0.608574
ENSG00000143412.10	ANXA9	pink	M4	0.0873398	0.616386	0.887458	0.134816	-0.415411	-0.384403	-0.540771	-0.499213	-0.663978	-0.183997	0.182432	0.0477962	-0.350352
ENSG00000143409.15	MINDY1	red	M2	0.215784	0.934448	0.612546	0.515989	-0.127344	-0.228665	-0.335185	-0.819838	-0.617635	-0.444512	-0.056957	-0.465414	-0.730346
ENSG00000143363.17	PRUNE1	black	M3	-0.0578128	-0.164742	0.577332	-0.23578	-0.321049	-0.243193	-0.472954	0.203145	-0.15711	-0.0510792	0.370847	0.571521	0.231682
ENSG00000163141.19	BNIPL	pink	M4	0.108428	0.695823	0.816118	0.140272	-0.467101	-0.351472	-0.518173	-0.576613	-0.71378	-0.225929	0.111524	-0.0771694	-0.412718
ENSG00000143443.9	C1orf56	red	M2	0.0498552	0.699047	0.766651	0.404545	-0.188122	-0.140796	-0.400037	-0.629236	-0.602689	-0.264285	0.280313	-0.100288	-0.389041
ENSG00000150316.12	CWC15	turquoise	M1	0.209317	-0.6938	-0.155869	-0.741559	-0.191967	-0.238907	0.0026669	0.960361	0.616674	0.118713	-0.0138159	0.78923	0.642529
ENSG00000213190.3	MLLT11	purple	M6	-0.681345	-0.655682	-0.558071	-0.0619891	0.170651	0.605872	0.445805	0.177525	0.100933	0.761867	0.322422	0.00369695	0.572822
ENSG00000143458.12	GABPB2	pink	M4	0.373974	0.617358	0.817235	0.0718108	-0.434127	-0.489901	-0.509101	-0.315391	-0.403653	-0.526808	0.0300257	0.107971	-0.423605
ENSG00000143434.15	SEMA6C	red	M2	0.280885	0.945155	0.469606	0.691976	0.151071	-0.139645	-0.262386	-0.827235	-0.527211	-0.504669	-0.129344	-0.55596	-0.807716
ENSG00000163154.6	TNFAIP8L2	tan	M8	-0.0656097	-0.439708	-0.664665	0.0863163	0.751066	0.327442	0.576253	0.35728	0.784569	0.187944	-0.0950442	-0.00819601	0.269712
ENSG00000122873.12	CISD1	turquoise	M1	0.202521	-0.716023	-0.295898	-0.842233	-0.272527	-0.309128	-0.0856113	0.960072	0.609317	0.221725	-0.19388	0.642356	0.581872
ENSG00000163155.12	LYSMD1	pink	M4	0.16204	0.569546	0.839304	0.301702	-0.179206	-0.261073	-0.394519	-0.447137	-0.616739	-0.317728	0.238811	0.100745	-0.360431
ENSG00000138757.14	G3BP2	turquoise	M1	0.0454659	-0.824702	-0.373217	-0.760076	-0.131585	-0.138815	0.121612	0.960061	0.66969	0.354207	-0.0580116	0.653442	0.695063
ENSG00000143398.20	PIP5K1A	black	M3	-0.300097	-0.77106	-0.0618338	-0.584916	-0.236826	0.229368	0.190093	0.689505	0.347375	0.331227	0.476605	0.807001	0.893347
ENSG00000159352.15	PSMD4	magenta	M5	0.857788	0.51907	0.278575	-0.11512	-0.153687	-0.828181	-0.506391	0.0409781	0.0470945	-0.592352	-0.714826	-0.128492	-0.676807
ENSG00000143373.18	ZNF687	red	M2	0.485338	0.976978	0.387667	0.510245	0.0408401	-0.323723	-0.253749	-0.709636	-0.351356	-0.597547	-0.366225	-0.575895	-0.868989
ENSG00000143393.16	PI4KB	red	M2	0.612884	0.779836	0.647096	0.351776	0.0195016	-0.4585	-0.307673	-0.386128	-0.28327	-0.653354	-0.182482	-0.104515	-0.664282
ENSG00000143390.17	RFX5	salmon	M9	-0.641094	-0.166917	-0.220105	0.593815	0.638722	0.79545	0.788743	-0.320108	-0.0685948	0.451185	0.595408	-0.170307	0.263155
ENSG00000143416.21	SELENBP1	red	M2	0.188259	0.844584	0.601383	0.635585	0.00599934	-0.204397	-0.367833	-0.762976	-0.607793	-0.359391	0.00819333	-0.436125	-0.724021
ENSG00000146731.11	CCT6A	turquoise	M1	0.43709	-0.571069	-0.281086	-0.819592	-0.246826	-0.429799	-0.13863	0.959925	0.708758	-0.0635718	-0.3697	0.595803	0.409811
ENSG00000143442.22	POGZ	pink	M4	-0.158447	0.0282556	0.733505	0.0789935	-0.13004	0.103658	-0.099529	-0.0487568	-0.217429	-0.178945	0.709001	0.622086	0.298377
ENSG00000143375.15	CGN	red	M2	0.419889	0.878643	0.751857	0.188344	-0.398054	-0.540018	-0.574396	-0.578733	-0.59621	-0.481853	-0.190561	-0.229073	-0.681578
ENSG00000143367.16	TUFT1	pink	M4	-0.0297203	0.525995	0.845713	0.0944542	-0.513142	-0.220816	-0.396291	-0.484565	-0.706625	-0.185037	0.324091	0.0898243	-0.220133
ENSG00000143376.14	SNX27	black	M3	0.180796	-0.441314	0.128313	-0.499264	-0.114738	-0.260733	-0.270921	0.70028	0.623489	-0.0512629	0.141006	0.742434	0.499426
ENSG00000153922.10	CHD1	turquoise	M1	0.152978	-0.736426	-0.35294	-0.802796	-0.192692	-0.180463	0.0826053	0.959922	0.743884	0.152676	-0.121451	0.665878	0.658001
ENSG00000056097.16	ZFR	turquoise	M1	0.150862	-0.723376	-0.257031	-0.790747	-0.237855	-0.184439	-0.0148804	0.959915	0.738819	0.0806176	-0.0379557	0.740295	0.680865
ENSG00000143365.19	RORC	pink	M4	0.298877	0.805425	0.850983	0.185563	-0.398475	-0.480304	-0.545935	-0.563946	-0.607603	-0.402095	-0.00612586	-0.0996476	-0.551853
ENSG00000196407.12	THEM5	pink	M4	0.0506298	0.581033	0.910344	0.131156	-0.423716	-0.401919	-0.566937	-0.484362	-0.690919	-0.111539	0.227901	0.0611349	-0.328817
ENSG00000175110.11	MRPS22	turquoise	M1	0.318643	-0.593789	-0.095753	-0.865871	-0.363135	-0.411369	-0.146297	0.959782	0.634047	0.029308	-0.144876	0.773384	0.565645
ENSG00000109534.17	GAR1	turquoise	M1	0.413695	-0.578405	-0.232711	-0.84458	-0.303823	-0.432575	-0.170441	0.959774	0.639407	-0.0435288	-0.322817	0.633351	0.439517
ENSG00000103035.11	PSMD7	turquoise	M1	0.446077	-0.554881	-0.225881	-0.821232	-0.262057	-0.464736	-0.11781	0.959664	0.677876	-0.0128963	-0.341114	0.622802	0.415041
ENSG00000215853.3	RPTN	salmon	M9	-0.55272	-0.358228	-0.130706	-0.0758701	-0.119469	0.528524	0.340034	0.00382886	-0.0865469	0.221906	0.470871	0.165871	0.488486
ENSG00000143631.10	FLG	pink	M4	0.130466	0.550661	0.93944	0.0661619	-0.455069	-0.451007	-0.607247	-0.391526	-0.599629	-0.213573	0.203135	0.170823	-0.300534
ENSG00000143520.6	FLG2	pink	M4	0.00635968	0.377546	0.91436	-0.0224262	-0.475475	-0.427777	-0.592482	-0.285799	-0.581968	-0.0335495	0.295419	0.270331	-0.147862
ENSG00000186207.5	LCE5A	red	M2	0.335561	0.815769	0.293678	0.254235	-0.215205	-0.392884	-0.409931	-0.644131	-0.480643	-0.350524	-0.439058	-0.625417	-0.787463
ENSG00000169509.6	CRCT1	red	M2	-0.419211	0.26233	-0.0489567	0.373666	-0.00906421	0.469638	0.294587	-0.619069	-0.483247	0.0533466	0.195764	-0.46708	-0.148741
ENSG00000185966.3	LCE3E	grey	M0	-0.49697	-0.36007	-0.30567	-0.0294274	-0.0253823	0.551664	0.272606	-0.0150342	-0.050887	0.200539	0.289382	0.000555053	0.368154
ENSG00000163202.5	LCE3D	grey	M0	-0.383718	-0.230711	-0.350138	0.094659	0.106077	0.537289	0.486419	-0.0877328	-0.0294226	0.124115	0.18107	-0.122452	0.21967
ENSG00000185962.1	LCE3A	grey	M0	-0.353943	-0.192088	-0.326834	0.163349	0.17804	0.544324	0.584315	-0.116518	-0.0261965	0.0752798	0.186193	-0.133074	0.174646
ENSG00000187223.3	LCE2D	pink	M4	0.456923	0.692281	0.672961	-0.0309482	-0.544486	-0.698916	-0.776514	-0.369346	-0.437272	-0.516801	-0.320664	-0.153886	-0.641692
ENSG00000187180.3	LCE2C	pink	M4	0.484045	0.723045	0.595651	-0.0354221	-0.542347	-0.704689	-0.746015	-0.386064	-0.407404	-0.519981	-0.396325	-0.237415	-0.681672
ENSG00000159455.8	LCE2B	pink	M4	0.402131	0.605119	0.749391	-0.0906308	-0.57125	-0.705284	-0.788974	-0.297743	-0.451908	-0.442798	-0.204014	-0.0188259	-0.529371
ENSG00000187173.4	LCE2A	red	M2	0.47904	0.711555	0.388943	-0.0358562	-0.482407	-0.644737	-0.677096	-0.40256	-0.38699	-0.468191	-0.526841	-0.400497	-0.720432
ENSG00000187170.4	LCE4A	pink	M4	0.207817	0.0372375	0.500837	-0.42457	-0.59649	-0.619025	-0.758548	0.169898	-0.201005	-0.123032	-0.0924439	0.304225	-0.0743593
ENSG00000198854.5	C1orf68	red	M2	0.49378	0.859889	0.546149	0.147015	-0.381325	-0.588698	-0.613358	-0.546615	-0.472622	-0.555939	-0.407786	-0.396958	-0.788726
ENSG00000203786.6	KPRP	pink	M4	0.226024	0.506547	0.825675	-0.0793648	-0.603789	-0.552176	-0.739146	-0.30877	-0.526497	-0.392466	0.0259489	0.108157	-0.369266
ENSG00000240386.3	LCE1F	red	M2	0.352702	0.767498	0.527928	0.142237	-0.433374	-0.542923	-0.605514	-0.560807	-0.558986	-0.438992	-0.337748	-0.416941	-0.746051
ENSG00000186226.9	LCE1E	pink	M4	0.242939	0.614829	0.668086	0.0603633	-0.435138	-0.518617	-0.547829	-0.424242	-0.575151	-0.234959	-0.0945983	-0.132524	-0.49441
ENSG00000172155.9	LCE1D	red	M2	0.380852	0.639194	0.498249	0.0533528	-0.378234	-0.535349	-0.519085	-0.402209	-0.492675	-0.396161	-0.296093	-0.269431	-0.616773
ENSG00000197084.5	LCE1C	pink	M4	0.399172	0.80512	0.650533	0.135293	-0.450551	-0.604314	-0.687147	-0.543023	-0.559774	-0.46639	-0.29515	-0.320117	-0.732833
ENSG00000196734.8	LCE1B	pink	M4	0.259447	0.579953	0.731227	-0.0290281	-0.551702	-0.633636	-0.767631	-0.371271	-0.571011	-0.265466	-0.1289	-0.0854959	-0.505174
ENSG00000186844.5	LCE1A	red	M2	0.437335	0.812307	0.568596	0.123317	-0.434461	-0.600877	-0.660328	-0.53856	-0.51004	-0.51274	-0.378019	-0.381338	-0.769911
ENSG00000235942.2	LCE6A	pink	M4	0.337693	0.51737	0.736635	-0.0913429	-0.562214	-0.684549	-0.766137	-0.239057	-0.445967	-0.320048	-0.131725	0.0327299	-0.450165
ENSG00000126945.9	HNRNPH2	turquoise	M1	0.193096	-0.710868	-0.274384	-0.835954	-0.26175	-0.303177	-0.0175252	0.959578	0.724366	0.10297	-0.16597	0.674033	0.592161
ENSG00000283227.1	SPRR5	pink	M4	0.0891044	0.115909	0.249678	-0.25899	-0.437063	-0.350885	-0.453032	-0.0375966	-0.28061	-0.0417673	-0.124991	-0.0214932	-0.143852
ENSG00000169474.4	SPRR1A	salmon	M9	-0.70478	-0.460085	-0.42272	0.0828225	0.0962852	0.828338	0.576675	-0.0452263	-0.0167421	0.349812	0.508019	-0.00790435	0.540248
ENSG00000163209.15	SPRR3	salmon	M9	-0.512078	-0.250986	-0.320005	0.197602	0.195827	0.731433	0.766423	-0.124333	0.0214949	0.12049	0.434742	-0.038148	0.370613
ENSG00000169469.9	SPRR1B	salmon	M9	-0.703717	-0.576566	-0.47134	-0.0742335	0.021623	0.741731	0.500534	0.0926688	0.0430088	0.439928	0.457866	0.0619645	0.622995
ENSG00000163216.7	SPRR2D	grey	M0	-0.326444	-0.25875	-0.397155	0.104275	0.18593	0.562788	0.595391	-0.0196155	0.0981082	0.0578327	0.174142	-0.0785905	0.245821
ENSG00000241794.2	SPRR2A	grey	M0	-0.535169	-0.314763	-0.399572	0.171331	0.189506	0.761263	0.673806	-0.0947588	0.0326087	0.162518	0.384398	-0.0672734	0.377505
ENSG00000196805.7	SPRR2B	grey	M0	-0.165151	-0.198674	-0.326251	0.0168879	0.11018	0.338366	0.367729	0.0349901	0.107679	-0.00152493	0.0139285	-0.0684454	0.135642
ENSG00000203785.9	SPRR2E	grey	M0	-0.243404	-0.281464	-0.360904	-0.0566321	0.022923	0.428172	0.338974	0.0706099	0.0844157	0.0100257	0.0812156	-0.0172929	0.245438
ENSG00000244094.2	SPRR2F	grey	M0	-0.0796287	-0.00153248	-0.187914	0.151466	0.191864	0.218716	0.557475	-0.104737	-0.00557729	-0.010462	-0.0193263	-0.153808	-0.0411531
ENSG00000159516.9	SPRR2G	grey	M0	-0.16473	-0.319167	-0.390558	-0.165966	-0.0320117	0.317775	0.23049	0.178929	0.163773	0.0318923	-0.00337552	0.0203782	0.260783
ENSG00000203782.6	LOR	pink	M4	0.105811	0.186359	0.78883	-0.306757	-0.599526	-0.599134	-0.700821	-0.00557116	-0.405106	-0.0265244	0.132262	0.385481	-0.055656
ENSG00000159527.3	PGLYRP3	pink	M4	0.191877	0.592057	0.801974	-0.0371237	-0.570174	-0.477332	-0.558098	-0.420674	-0.719457	-0.205162	0.0203803	0.0077707	-0.385585
ENSG00000163218.15	PGLYRP4	grey	M0	-0.306519	-0.164063	-0.0227835	-0.0170608	-0.120814	0.321049	0.150346	-0.0618355	-0.140572	0.0233987	0.251648	0.0745584	0.205752
ENSG00000173812.11	EIF1	turquoise	M1	0.182465	-0.736153	-0.29812	-0.748381	-0.177674	-0.156384	0.0661949	0.959568	0.637099	0.113184	-0.0721362	0.697705	0.634765
ENSG00000134077.16	THUMPD3	turquoise	M1	0.27504	-0.660662	-0.17537	-0.773017	-0.215028	-0.286545	-0.0105744	0.9595	0.633197	0.041463	-0.107938	0.752797	0.581451
ENSG00000100697.14	DICER1	turquoise	M1	0.193714	-0.711025	-0.228205	-0.766279	-0.156101	-0.20017	0.0539168	0.959432	0.761262	0.0157676	-0.0572054	0.765636	0.649698
ENSG00000144895.12	EIF2A	turquoise	M1	0.100639	-0.746153	-0.114549	-0.871286	-0.352145	-0.27726	-0.130429	0.959248	0.560231	0.198405	0.0165842	0.813754	0.706648
ENSG00000159593.15	NAE1	turquoise	M1	0.0410666	-0.784741	-0.180197	-0.838631	-0.291427	-0.209728	-0.0375214	0.959097	0.565374	0.338346	0.0478379	0.787559	0.754503
ENSG00000197956.10	S100A6	grey	M0	0.0881843	-0.121053	-0.180354	-0.110942	-0.0975077	-0.208334	-0.278357	0.21492	0.207354	0.224859	-0.165254	-0.0692408	-0.00301391
ENSG00000196154.12	S100A4	red	M2	0.0498474	0.38889	0.144412	0.268099	-0.126718	-0.202535	-0.258686	-0.351908	-0.236557	0.0870463	-0.100009	-0.387572	-0.385746
ENSG00000180370.10	PAK2	turquoise	M1	0.140344	-0.764245	-0.449459	-0.751906	-0.112254	-0.172273	0.0673653	0.958979	0.801415	0.218449	-0.172874	0.576727	0.619551
ENSG00000113575.10	PPP2CA	turquoise	M1	0.0649267	-0.790466	-0.247883	-0.860647	-0.306861	-0.170176	0.0484735	0.958825	0.602068	0.216381	-0.0139206	0.755912	0.729278
ENSG00000065135.11	GNAI3	turquoise	M1	0.0694931	-0.801138	-0.32369	-0.849375	-0.268389	-0.167534	-0.00376066	0.958789	0.660214	0.190782	-0.0762405	0.698633	0.70043
ENSG00000152683.14	SLC30A6	turquoise	M1	0.0325262	-0.796889	-0.242542	-0.843747	-0.291743	-0.171947	-0.0290974	0.958762	0.613443	0.278032	0.0235336	0.754951	0.751548
ENSG00000136378.15	ADAMTS7	blue	M10	-0.0187459	0.618683	0.0374943	0.938361	0.617068	0.324656	0.133995	-0.78687	-0.33503	-0.27833	0.00716091	-0.687412	-0.637872
ENSG00000159596.7	TMEM69	turquoise	M1	0.194178	-0.705455	-0.215651	-0.860746	-0.286593	-0.330768	-0.121369	0.958729	0.632234	0.148637	-0.147843	0.707373	0.602785
ENSG00000120694.19	HSPH1	turquoise	M1	0.277827	-0.683625	-0.400316	-0.798507	-0.201016	-0.256756	-0.0421332	0.95867	0.68016	0.0762289	-0.278287	0.570343	0.523754
ENSG00000154719.13	MRPL39	turquoise	M1	0.158892	-0.715334	-0.142349	-0.870545	-0.353235	-0.295349	-0.1006	0.958635	0.58467	0.144863	-0.0498966	0.784548	0.659378
ENSG00000169418.10	NPR1	red	M2	0.462129	0.715439	0.286931	0.545265	0.183515	-0.261448	-0.344548	-0.452744	-0.220746	-0.475927	-0.252228	-0.404589	-0.700536
ENSG00000143614.10	GATAD2B	red	M2	0.579858	0.916912	0.57627	0.428134	-0.00962551	-0.348926	-0.267895	-0.547186	-0.300783	-0.725988	-0.206902	-0.257273	-0.719018
ENSG00000198837.10	DENND4B	magenta	M5	0.608864	0.36134	-0.166322	0.359784	0.590747	-0.0641568	0.218264	-0.0152698	0.474746	-0.629072	-0.392122	-0.181623	-0.405201
ENSG00000160741.17	CRTC2	red	M2	0.629088	0.656431	0.479458	0.287621	0.132291	-0.398937	-0.172433	-0.224424	0.144102	-0.747839	-0.208523	-0.00455974	-0.523061
ENSG00000143578.16	CREB3L4	red	M2	0.322316	0.873784	0.741525	0.44101	-0.155304	-0.394254	-0.457533	-0.674235	-0.59799	-0.45235	-0.0481204	-0.29821	-0.716314
ENSG00000165704.15	HPRT1	turquoise	M1	0.219309	-0.720944	-0.468271	-0.789526	-0.169984	-0.234936	0.0510277	0.958354	0.71613	0.191913	-0.280265	0.523525	0.542544
ENSG00000164934.14	DCAF13	turquoise	M1	0.406684	-0.591777	-0.340879	-0.769102	-0.156532	-0.343872	0.030918	0.958337	0.762578	-0.027057	-0.332945	0.586393	0.446699
ENSG00000185009.12	AP3M1	turquoise	M1	0.0485062	-0.791911	-0.252472	-0.811192	-0.244958	-0.164105	-0.0240951	0.95832	0.63859	0.243333	0.0214396	0.750304	0.738344
ENSG00000155096.14	AZIN1	turquoise	M1	0.233873	-0.688826	-0.192467	-0.806123	-0.287959	-0.231464	-0.0282258	0.958281	0.646752	-0.0166488	-0.0762299	0.759102	0.614652
ENSG00000173744.17	AGFG1	turquoise	M1	0.302826	-0.646336	-0.330138	-0.804854	-0.209168	-0.287684	-0.023798	0.958167	0.743839	0.0204105	-0.248668	0.624713	0.532428
ENSG00000198818.10	SFT2D1	turquoise	M1	0.101881	-0.756133	-0.242125	-0.797533	-0.202783	-0.15949	0.0111251	0.957994	0.723183	0.141763	-0.00400148	0.772554	0.721878
ENSG00000167635.11	ZNF146	turquoise	M1	0.164968	-0.733125	-0.227019	-0.771113	-0.219327	-0.156721	0.0390465	0.957952	0.638973	0.0788431	-0.0177156	0.767923	0.673819
ENSG00000187942.11	LDLRAD2	blue	M10	-0.122534	0.632604	0.105351	0.934858	0.485247	0.296087	0.104756	-0.856656	-0.444236	-0.154022	0.0649746	-0.721201	-0.642244
ENSG00000112081.17	SRSF3	turquoise	M1	0.347071	-0.617394	-0.167509	-0.833829	-0.29865	-0.378863	-0.0882872	0.957902	0.589964	0.0148419	-0.211411	0.713313	0.510104
ENSG00000169291.10	SHE	red	M2	0.726369	0.740125	0.453534	0.227967	-0.0305404	-0.604882	-0.608293	-0.253731	-0.104799	-0.631501	-0.419281	-0.19666	-0.705316
ENSG00000163239.12	TDRD10	red	M2	0.49543	0.922715	0.542642	0.47283	-0.0698502	-0.40022	-0.475806	-0.624059	-0.423742	-0.620596	-0.271202	-0.411306	-0.820491
ENSG00000143621.17	ILF2	turquoise	M1	0.370266	-0.621734	-0.322643	-0.769273	-0.164883	-0.387067	-0.0602816	0.95785	0.685598	0.0588463	-0.339008	0.568205	0.427773
ENSG00000091009.8	RBM27	turquoise	M1	0.109638	-0.742002	-0.187035	-0.84643	-0.336449	-0.223225	-0.0745433	0.957516	0.636489	0.155813	-0.0061779	0.779592	0.703767
ENSG00000163344.6	PMVK	red	M2	0.525611	0.887692	0.488681	0.209927	-0.276303	-0.529336	-0.463893	-0.561459	-0.472449	-0.572407	-0.418984	-0.430684	-0.802289
ENSG00000163346.17	PBXIP1	red	M2	0.152935	0.890005	0.403813	0.772079	0.213558	-0.0223353	-0.071165	-0.881215	-0.498012	-0.454071	-0.0540291	-0.62333	-0.788328
ENSG00000163348.4	PYGO2	red	M2	0.535002	0.947251	0.641385	0.393485	-0.10645	-0.451833	-0.441923	-0.618278	-0.455454	-0.679919	-0.259074	-0.32594	-0.803758
ENSG00000160691.18	SHC1	purple	M6	-0.273893	-0.799222	-0.804644	-0.288511	0.294979	0.492385	0.585221	0.61564	0.623246	0.411589	0.062713	0.208803	0.657683
ENSG00000130935.10	NOL11	turquoise	M1	0.359229	-0.602374	-0.1552	-0.860463	-0.323449	-0.414807	-0.16441	0.957378	0.626046	-0.0256097	-0.241194	0.716464	0.498675
ENSG00000065150.20	IPO5	turquoise	M1	0.338376	-0.638398	-0.337781	-0.760319	-0.196846	-0.317501	-0.112199	0.957372	0.703054	0.0470491	-0.274348	0.579876	0.477443
ENSG00000160685.13	ZBTB7B	red	M2	0.541891	0.888509	0.486917	0.144307	-0.32858	-0.554928	-0.469971	-0.541769	-0.456106	-0.562766	-0.456065	-0.412341	-0.784535
ENSG00000143537.13	ADAM15	red	M2	0.631888	0.927511	0.570001	0.226246	-0.25107	-0.597238	-0.547956	-0.524087	-0.480274	-0.600276	-0.430127	-0.36487	-0.829236
ENSG00000243364.8	EFNA4	red	M2	0.416777	0.878792	0.763831	0.227396	-0.342027	-0.518269	-0.579066	-0.593029	-0.596791	-0.504891	-0.171049	-0.227909	-0.692424
ENSG00000143590.14	EFNA3	pink	M4	0.382529	0.715092	0.82058	-0.0161801	-0.576325	-0.588898	-0.695794	-0.415831	-0.575149	-0.465029	-0.108109	-0.0189153	-0.514739
ENSG00000169242.12	EFNA1	pink	M4	0.591118	0.597798	0.803051	-0.153173	-0.464824	-0.713757	-0.621587	-0.136646	-0.361765	-0.522533	-0.176608	0.203114	-0.423413
ENSG00000000419.12	DPM1	turquoise	M1	0.0842096	-0.759414	-0.218231	-0.865676	-0.324221	-0.263374	-0.0728809	0.957323	0.598289	0.276108	-0.0461126	0.730911	0.692718
ENSG00000179085.7	DPM3	red	M2	0.171914	0.855115	0.350797	0.624652	0.115779	-0.183802	-0.13924	-0.832406	-0.561845	-0.273548	-0.21912	-0.687072	-0.828448
ENSG00000163463.11	KRTCAP2	magenta	M5	0.617887	0.378438	0.2164	0.053043	0.0222775	-0.300293	-0.0492861	0.0429071	0.166211	-0.538823	-0.287676	0.102454	-0.301861
ENSG00000185499.16	MUC1	greenyellow	M7	-0.491542	-0.372025	-0.12773	-0.064399	-0.0424621	0.266205	0.124637	0.0362714	-0.21201	0.4642	0.302082	0.0546808	0.318441
ENSG00000169231.13	THBS3	red	M2	-0.0806199	0.586589	0.54095	0.492498	-0.079895	-0.169019	-0.493029	-0.704507	-0.717613	-0.0737265	0.0749502	-0.405124	-0.575107
ENSG00000103591.12	AAGAB	turquoise	M1	0.153292	-0.767211	-0.405509	-0.77553	-0.183915	-0.108098	0.124657	0.95724	0.685014	0.121498	-0.121509	0.642283	0.650189
ENSG00000162972.10	MAIP1	turquoise	M1	0.0861933	-0.772862	-0.205675	-0.80301	-0.21018	-0.220491	0.0460773	0.957238	0.61539	0.28772	-0.00224887	0.758794	0.702785
ENSG00000160753.16	RUSC1	red	M2	0.361074	0.971982	0.517083	0.538557	-0.0692514	-0.288828	-0.370148	-0.778438	-0.599051	-0.490407	-0.220048	-0.537792	-0.830795
ENSG00000116539.13	ASH1L	black	M3	0.170358	-0.290986	0.519019	-0.533156	-0.429726	-0.283874	-0.246863	0.567311	0.262516	-0.224039	0.357167	0.931991	0.506378
ENSG00000138231.12	DBR1	turquoise	M1	0.292542	-0.630313	-0.147543	-0.839317	-0.32319	-0.431206	-0.194989	0.95722	0.605892	0.125122	-0.185588	0.698006	0.524997
ENSG00000163374.19	YY1AP1	black	M3	0.642632	0.179039	0.565044	-0.316972	-0.313165	-0.561053	-0.389292	0.366242	0.250689	-0.584078	-0.058417	0.612887	-0.0156187
ENSG00000117133.11	RPF1	turquoise	M1	0.214141	-0.676131	-0.20879	-0.85397	-0.300767	-0.30414	-0.107373	0.957209	0.705432	0.0613427	-0.127469	0.732114	0.618844
ENSG00000116580.18	GON4L	red	M2	0.48159	0.524779	0.633912	0.262023	0.05433	-0.213279	-0.107305	-0.174969	0.000644453	-0.749192	0.112669	0.2562	-0.289863
ENSG00000132718.9	SYT11	salmon	M9	-0.782902	-0.405539	-0.354154	0.45389	0.526465	0.806305	0.582039	-0.160388	-0.0103537	0.661463	0.611474	-0.113117	0.426252
ENSG00000108256.9	NUFIP2	turquoise	M1	0.0754001	-0.796445	-0.304172	-0.794479	-0.215109	-0.0944682	0.0750132	0.957025	0.697006	0.127322	-0.00398191	0.74378	0.727575
ENSG00000132680.11	KHDC4	black	M3	-0.073312	-0.127109	0.560163	-0.177206	-0.217326	0.0546313	-0.153531	0.203852	-0.0157038	-0.131141	0.579045	0.745657	0.46298
ENSG00000116584.18	ARHGEF2	brown	M11	0.391285	0.211545	-0.312295	0.441014	0.691345	0.0775153	0.129472	-0.0367265	0.531422	-0.475135	-0.315065	-0.271132	-0.339596
ENSG00000198860.12	TSEN15	turquoise	M1	0.0761526	-0.784176	-0.368173	-0.797661	-0.220594	-0.0981993	0.153807	0.956897	0.665992	0.235142	-0.0353951	0.679883	0.724774
ENSG00000160803.8	UBQLN4	magenta	M5	0.766844	-0.0345786	0.139751	-0.531337	-0.285233	-0.670533	-0.455911	0.624005	0.466322	-0.550497	-0.454365	0.466672	-0.0501409
ENSG00000104320.13	NBN	turquoise	M1	0.0558676	-0.797167	-0.339549	-0.782282	-0.176812	-0.157305	0.0537846	0.956838	0.721857	0.264305	-0.0483099	0.674309	0.697224
ENSG00000132698.15	RAB25	red	M2	0.217961	0.594603	0.525888	-0.0347029	-0.534124	-0.360381	-0.316623	-0.439457	-0.584761	-0.366391	-0.156179	-0.170737	-0.442575
ENSG00000160789.20	LMNA	red	M2	0.370719	0.906188	0.280879	0.429811	-0.116245	-0.338457	-0.372691	-0.720804	-0.53192	-0.351951	-0.426859	-0.707417	-0.866127
ENSG00000196189.13	SEMA4A	red	M2	0.69459	0.540469	0.494075	-0.265975	-0.395646	-0.694281	-0.469157	-0.0106792	0.0763401	-0.681964	-0.421443	0.126382	-0.407982
ENSG00000198900.6	TOP1	turquoise	M1	0.16943	-0.734536	-0.35574	-0.780387	-0.165244	-0.138826	0.13811	0.956747	0.751362	0.0708406	-0.111795	0.682748	0.654867
ENSG00000160783.19	PMF1	red	M2	0.578434	0.446893	0.497086	-0.0725261	-0.248869	-0.384508	-0.167694	-0.0147245	-0.188618	-0.516674	-0.0929892	0.205773	-0.250033
ENSG00000160781.17	PAQR6	red	M2	0.351757	0.874127	0.777562	0.306425	-0.245614	-0.399188	-0.428386	-0.623662	-0.609082	-0.459444	-0.0472169	-0.188941	-0.620983
ENSG00000198952.8	SMG5	magenta	M5	0.888633	0.445912	0.313125	-0.22031	-0.266959	-0.6492	-0.508974	0.165496	0.105458	-0.78821	-0.547038	0.13142	-0.45072
ENSG00000163472.19	TMEM79	red	M2	0.299179	0.541495	0.503408	-0.146874	-0.54175	-0.438639	-0.405896	-0.317995	-0.52961	-0.35963	-0.219443	-0.0954017	-0.397615
ENSG00000198715.13	GLMP	salmon	M9	-0.687568	-0.170236	-0.219193	0.586322	0.63528	0.614789	0.368494	-0.366666	-0.165283	0.627573	0.468133	-0.314939	0.138483
ENSG00000164323.14	CFAP97	turquoise	M1	0.131828	-0.734275	-0.290949	-0.855107	-0.29861	-0.282123	-0.0955315	0.956718	0.670062	0.222936	-0.133082	0.661595	0.638537
ENSG00000116604.18	MEF2D	red	M2	0.211615	0.838496	0.397899	0.698098	0.197854	-0.0216235	-0.0926907	-0.747573	-0.351221	-0.465361	-0.00203234	-0.489181	-0.664241
ENSG00000183856.11	IQGAP3	greenyellow	M7	-0.690926	-0.331754	-0.217373	0.116838	0.157938	0.39803	0.224444	-0.125106	-0.289062	0.939341	0.370455	-0.152309	0.336729
ENSG00000163382.12	NAXE	magenta	M5	0.846499	0.486394	0.276809	-0.301116	-0.494801	-0.751691	-0.493981	0.103111	-0.0307531	-0.698779	-0.648916	-0.0212789	-0.535064
ENSG00000023734.11	STRAP	turquoise	M1	0.308296	-0.663745	-0.428558	-0.796382	-0.196236	-0.333251	-0.0539159	0.95666	0.7119	0.12207	-0.360244	0.507183	0.460341
ENSG00000132692.19	BCAN	pink	M4	0.26783	0.593546	0.849285	0.108633	-0.406175	-0.489298	-0.596462	-0.389941	-0.488757	-0.45416	0.0453186	0.0640503	-0.454237
ENSG00000132688.11	NES	red	M2	0.249499	0.528582	-0.066997	0.478248	0.242335	-0.115047	-0.0521952	-0.407893	-0.19638	0.0319778	-0.306987	-0.588914	-0.557991
ENSG00000143320.9	CRABP2	red	M2	-0.17243	0.27233	-0.0952084	0.333715	0.105094	0.196851	0.431289	-0.470465	-0.385467	0.106195	-0.0582227	-0.48681	-0.296782
ENSG00000170191.5	NANP	turquoise	M1	0.256891	-0.698098	-0.399458	-0.743342	-0.119558	-0.199889	0.0380017	0.956433	0.728518	0.0900768	-0.20514	0.596462	0.5608
ENSG00000143303.12	RRNAD1	pink	M4	0.0652446	0.408911	0.771438	0.380467	-0.0398404	-0.144395	-0.327891	-0.351262	-0.395504	-0.322632	0.37649	0.184955	-0.241995
ENSG00000143314.12	MRPL24	magenta	M5	0.854704	0.157265	0.152816	-0.468238	-0.312315	-0.798512	-0.469571	0.478578	0.364286	-0.53182	-0.603461	0.262036	-0.255979
ENSG00000143321.19	HDGF	magenta	M5	0.87441	0.509905	0.0387914	-0.230897	-0.280328	-0.769139	-0.416919	0.0721532	0.0636439	-0.531344	-0.858455	-0.260599	-0.643984
ENSG00000143294.15	PRCC	magenta	M5	0.931201	0.236995	0.0824956	-0.490816	-0.310241	-0.783334	-0.33127	0.437563	0.329781	-0.557423	-0.728762	0.174813	-0.321333
ENSG00000027869.11	SH2D2A	yellow	M12	-0.184761	-0.556937	-0.618241	-0.217649	0.277064	0.318287	0.774452	0.428502	0.448708	0.40515	-0.0214225	0.0994888	0.44473
ENSG00000187800.13	PEAR1	red	M2	0.100309	0.747468	0.334106	0.84278	0.376655	0.0900889	-0.0795321	-0.758318	-0.419861	-0.327532	0.0660122	-0.512158	-0.643921
ENSG00000132694.18	ARHGEF11	red	M2	0.292592	0.583757	0.20374	0.693533	0.497345	0.14767	0.0936268	-0.454328	0.0366948	-0.630143	0.0388026	-0.260559	-0.464857
ENSG00000117036.12	ETV3	pink	M4	0.320047	0.301621	0.905314	-0.320678	-0.588281	-0.601127	-0.58099	0.0560069	-0.296112	-0.255564	0.164665	0.556383	-0.0220597
ENSG00000183853.18	KIRREL1	salmon	M9	-0.665544	-0.179323	-0.368596	0.656457	0.586161	0.863687	0.534154	-0.372582	-0.101958	0.347346	0.506315	-0.341139	0.164391
ENSG00000158473.6	CD1D	tan	M8	0.181032	-0.475999	-0.513775	-0.246152	0.451668	-0.0798061	0.170996	0.616544	0.837979	0.153598	-0.282268	0.202787	0.265606
ENSG00000158477.7	CD1A	pink	M4	0.484328	0.45313	0.697069	-0.221954	-0.500375	-0.752417	-0.668507	-0.0799619	-0.334803	-0.345935	-0.237296	0.133826	-0.413802
ENSG00000006459.11	KDM7A	turquoise	M1	0.130594	-0.743341	-0.208953	-0.836757	-0.285982	-0.178802	0.000352969	0.95628	0.589032	0.131795	-0.00760488	0.776697	0.707643
ENSG00000163563.8	MNDA	tan	M8	0.267158	-0.375365	-0.276567	-0.491259	-0.0279105	-0.229272	0.00228284	0.637439	0.871952	-0.156186	-0.232946	0.38524	0.313444
ENSG00000184575.12	XPOT	turquoise	M1	0.0520275	-0.827105	-0.413661	-0.81331	-0.22433	-0.144872	-0.00452856	0.956229	0.623617	0.289085	-0.115641	0.608117	0.671259
ENSG00000163568.15	AIM2	yellow	M12	-0.349871	-0.38901	-0.573552	0.360717	0.781721	0.736807	0.782258	0.0835135	0.512884	0.137427	0.282119	-0.0334417	0.351504
ENSG00000162706.13	CADM3	red	M2	0.418292	0.92483	0.41969	0.455266	-0.128646	-0.372045	-0.474584	-0.700817	-0.464563	-0.535173	-0.349152	-0.587652	-0.870103
ENSG00000213088.12	ACKR1	magenta	M5	0.932805	0.393213	0.194419	-0.251144	-0.178844	-0.732085	-0.477115	0.268639	0.319386	-0.699871	-0.629481	0.101996	-0.437428
ENSG00000179639.10	FCER1A	greenyellow	M7	-0.174728	-0.315027	0.0898889	-0.390428	-0.337409	-0.232396	-0.156111	0.287704	-0.0610507	0.593965	0.101567	0.265383	0.303294
ENSG00000158716.8	DUSP23	red	M2	0.654332	0.694707	0.0373782	0.200711	0.149068	-0.482662	-0.165293	-0.29058	-0.0469235	-0.334607	-0.66787	-0.497405	-0.720549
ENSG00000158714.11	SLAMF8	salmon	M9	-0.59788	-0.331595	-0.506222	0.533152	0.81196	0.891247	0.764006	-0.164293	0.188823	0.3542	0.444821	-0.182752	0.325234
ENSG00000104691.15	UBXN8	turquoise	M1	0.361668	-0.61145	-0.284648	-0.792028	-0.246097	-0.359935	-0.0493177	0.956146	0.637405	0.0619672	-0.281843	0.607381	0.467588
ENSG00000085552.17	IGSF9	red	M2	0.480329	0.838437	0.773904	0.11101	-0.438917	-0.55397	-0.586219	-0.482443	-0.534857	-0.562134	-0.182834	-0.110824	-0.618671
ENSG00000035687.10	ADSS	turquoise	M1	0.322599	-0.600274	-0.128649	-0.840502	-0.291529	-0.378953	-0.0645367	0.956139	0.694375	0.00583222	-0.154845	0.760821	0.56218
ENSG00000123213.23	NLN	turquoise	M1	0.356598	-0.629719	-0.319735	-0.760859	-0.163601	-0.315127	-0.0591971	0.956069	0.736032	-0.00560025	-0.275029	0.608992	0.478078
ENSG00000162729.14	IGSF8	red	M2	0.709615	0.838032	0.502044	0.0225149	-0.367219	-0.689727	-0.570227	-0.367886	-0.360772	-0.654003	-0.549478	-0.283638	-0.770972
ENSG00000153560.12	UBP1	turquoise	M1	0.172331	-0.72483	-0.319127	-0.769908	-0.146455	-0.138081	0.0878787	0.956038	0.687185	0.148019	-0.0750702	0.705849	0.676045
ENSG00000132716.18	DCAF8	pink	M4	-0.102884	0.0385657	0.750732	0.0172648	-0.14223	0.0218166	0.0173486	-0.00454342	-0.198495	-0.14344	0.65988	0.659422	0.30129
ENSG00000162735.18	PEX19	black	M3	0.242809	-0.21045	0.485592	-0.40938	-0.354931	-0.420318	-0.414775	0.491502	0.120599	-0.15562	0.203882	0.71128	0.272801
ENSG00000122218.16	COPA	greenyellow	M7	-0.480494	-0.910624	-0.442981	-0.424326	0.0461532	0.2664	0.263121	0.63329	0.341659	0.747157	0.267144	0.410692	0.75225
ENSG00000117118.9	SDHB	turquoise	M1	0.269678	-0.661655	-0.182254	-0.78477	-0.22994	-0.358683	-0.062562	0.955981	0.660713	0.0949244	-0.148138	0.702767	0.54164
ENSG00000162738.6	VANGL2	pink	M4	0.186703	0.655465	0.923349	0.115219	-0.429965	-0.406569	-0.462656	-0.472954	-0.674328	-0.305554	0.182283	0.0928351	-0.363462
ENSG00000066294.14	CD84	salmon	M9	-0.56025	-0.553337	-0.619741	0.264236	0.727817	0.779278	0.763793	0.137778	0.472067	0.470697	0.394542	-0.000677571	0.529323
ENSG00000117090.15	SLAMF1	yellow	M12	-0.36725	-0.511136	-0.519521	-0.0717837	0.212417	0.601119	0.850642	0.250244	0.307969	0.292498	0.259843	0.131615	0.526349
ENSG00000170144.20	HNRNPA3	turquoise	M1	0.421077	-0.546905	-0.121893	-0.825802	-0.305216	-0.423238	-0.117245	0.955977	0.682088	-0.106223	-0.222938	0.736023	0.483279
ENSG00000026751.17	SLAMF7	salmon	M9	-0.593062	-0.37653	-0.476268	0.213063	0.341147	0.816818	0.889761	-0.0651428	0.0762636	0.332898	0.434607	-0.0755233	0.44618
ENSG00000163428.4	LRRC58	turquoise	M1	0.227308	-0.668479	-0.285179	-0.878301	-0.320818	-0.318994	-0.0761063	0.955794	0.659178	0.151423	-0.18971	0.650175	0.598917
ENSG00000215845.11	TSTD1	red	M2	0.0781849	0.700306	0.506366	0.266303	-0.253267	-0.187792	-0.15537	-0.659726	-0.657729	-0.202935	-0.0361964	-0.350606	-0.511102
ENSG00000158773.14	USF1	tan	M8	0.289737	-0.190026	-0.154574	0.0369673	0.537364	0.018762	0.36311	0.385049	0.761815	-0.341788	-0.0419758	0.319056	0.141233
ENSG00000186517.14	ARHGAP30	tan	M8	0.363659	0.000844393	-0.409056	0.101421	0.606008	0.00935813	0.465969	0.214468	0.768894	-0.275838	-0.359253	-0.0652942	-0.082964
ENSG00000143217.9	NECTIN4	red	M2	0.356784	0.801738	0.686534	0.0945997	-0.471468	-0.4747	-0.481215	-0.550304	-0.617813	-0.461254	-0.183031	-0.216414	-0.605938
ENSG00000104381.12	GDAP1	turquoise	M1	0.236639	-0.684371	-0.301312	-0.763467	-0.193752	-0.192704	0.105602	0.955701	0.669301	0.0883171	-0.122754	0.683699	0.611468
ENSG00000158793.14	NIT1	pink	M4	0.109846	0.607899	0.841073	0.3775	-0.117741	-0.172154	-0.414474	-0.509504	-0.502496	-0.43897	0.31004	0.0909327	-0.340553
ENSG00000137040.9	RANBP6	turquoise	M1	0.213105	-0.684668	-0.121043	-0.850044	-0.316356	-0.315449	-0.0683034	0.955521	0.570734	0.120259	-0.0686062	0.789137	0.630305
ENSG00000143222.12	UFC1	black	M3	-0.228483	-0.61699	0.207243	-0.691495	-0.482742	-0.254801	-0.300432	0.606115	0.00270103	0.517102	0.289128	0.6983	0.634465
ENSG00000143258.16	USP21	red	M2	0.410242	0.899206	0.77243	0.442533	-0.130225	-0.402719	-0.476892	-0.637448	-0.527338	-0.585459	-0.0654395	-0.224922	-0.715648
ENSG00000143224.18	PPOX	red	M2	0.049811	0.803616	0.732458	0.634888	0.0589644	-0.0446805	-0.189382	-0.790107	-0.636748	-0.346167	0.248638	-0.24525	-0.536719
ENSG00000119414.11	PPP6C	turquoise	M1	0.171749	-0.690875	-0.0869334	-0.851736	-0.355816	-0.318363	-0.156984	0.95541	0.584557	0.157228	-0.00406925	0.804999	0.663957
ENSG00000164219.10	PGGT1B	turquoise	M1	0.0609991	-0.783771	-0.240099	-0.797091	-0.23938	-0.120551	0.0907082	0.955302	0.676966	0.15667	0.0436518	0.785563	0.748224
ENSG00000158864.12	NDUFS2	magenta	M5	0.804365	0.114243	0.199875	-0.447092	-0.215561	-0.808282	-0.404911	0.498236	0.338865	-0.373636	-0.558954	0.309655	-0.222851
ENSG00000158869.11	FCER1G	tan	M8	0.204664	-0.573405	-0.480772	-0.569633	0.0572333	-0.157055	0.130121	0.784142	0.891011	0.00797088	-0.282036	0.390442	0.424117
ENSG00000108094.14	CUL2	turquoise	M1	0.0194579	-0.796408	-0.195439	-0.798236	-0.235908	-0.114207	0.038821	0.955222	0.653057	0.239927	0.109963	0.825851	0.798719
ENSG00000113013.15	HSPA9	turquoise	M1	0.475032	-0.530897	-0.199763	-0.813186	-0.270173	-0.467527	-0.174435	0.955218	0.665552	-0.0825986	-0.341564	0.63566	0.397881
ENSG00000158887.16	MPZ	pink	M4	0.306382	0.671075	0.642106	0.20425	-0.247225	-0.428955	-0.488508	-0.482722	-0.394666	-0.459023	-0.13038	-0.178627	-0.583719
ENSG00000143252.14	SDHC	black	M3	0.00151085	-0.632342	0.193143	-0.766155	-0.450928	-0.259507	-0.154643	0.798371	0.277608	0.234412	0.260223	0.899571	0.705842
ENSG00000143226.13	FCGR2A	tan	M8	0.102447	-0.618965	-0.561958	-0.461576	0.178224	0.0269011	0.177734	0.741976	0.930351	0.0150038	-0.18726	0.359808	0.476917
ENSG00000173110.8	HSPA6	tan	M8	0.376049	-0.365903	-0.500577	-0.421118	0.150658	-0.111541	0.204096	0.640992	0.87902	-0.293148	-0.40266	0.249343	0.220813
ENSG00000132341.12	RAN	turquoise	M1	0.385341	-0.613846	-0.377973	-0.805479	-0.212948	-0.374594	-0.0494208	0.955128	0.683714	0.0451459	-0.388695	0.527329	0.419972
ENSG00000162747.11	FCGR3B	tan	M8	0.327849	-0.28034	-0.211623	-0.446793	-0.0486478	-0.250071	-0.0305619	0.574522	0.816189	-0.250655	-0.238927	0.361668	0.2436
ENSG00000072694.20	FCGR2B	greenyellow	M7	-0.605141	-0.351827	-0.183419	0.115763	0.190488	0.457518	0.503483	-0.0415703	-0.0064996	0.510028	0.440176	0.0104326	0.38123
ENSG00000163527.9	STT3B	turquoise	M1	0.0197762	-0.812975	-0.355179	-0.835764	-0.235257	-0.153905	0.0708061	0.95504	0.645105	0.365142	-0.0445185	0.665328	0.735954
ENSG00000107581.13	EIF3A	turquoise	M1	0.408436	-0.565254	-0.20859	-0.853982	-0.322224	-0.430215	-0.118851	0.955011	0.655069	-0.0525023	-0.304176	0.660029	0.457927
ENSG00000162745.10	OLFML2B	salmon	M9	-0.691377	-0.327728	-0.491659	0.558926	0.750842	0.887937	0.711433	-0.224238	0.0773795	0.501772	0.488983	-0.243347	0.32053
ENSG00000239887.6	C1orf226	red	M2	0.497652	0.746562	0.464851	0.220462	-0.170855	-0.33466	-0.0809858	-0.408398	-0.24966	-0.636994	-0.201648	-0.196048	-0.564001
ENSG00000187522.16	HSPA14	turquoise	M1	0.114796	-0.757008	-0.215905	-0.83637	-0.272084	-0.210678	0.0125809	0.954858	0.597711	0.193756	-0.0356614	0.753358	0.686773
ENSG00000108671.11	PSMD11	turquoise	M1	0.434792	-0.557354	-0.151635	-0.829068	-0.294314	-0.455361	-0.189092	0.954665	0.641567	-0.0875118	-0.28892	0.686293	0.433486
ENSG00000162733.18	DDR2	purple	M6	-0.322645	-0.405637	-0.21129	0.024376	0.00708354	0.444454	0.104958	0.173318	0.177699	-0.00913502	0.379217	0.17571	0.376135
ENSG00000132463.14	GRSF1	turquoise	M1	0.297658	-0.64693	-0.203845	-0.775306	-0.200317	-0.306982	0.0275702	0.954626	0.581118	0.125266	-0.149543	0.704377	0.553569
ENSG00000143248.13	RGS5	red	M2	0.140978	0.193227	0.323296	0.165569	0.009912	-0.0920615	-0.131783	-0.0320726	0.243683	-0.320266	0.19118	0.206611	-0.0315856
ENSG00000185630.18	PBX1	pink	M4	-0.331182	0.0760696	0.737553	0.139058	-0.253092	0.075747	-0.30438	-0.205726	-0.441238	0.0696274	0.742731	0.420695	0.231296
ENSG00000143198.13	MGST3	green	M13	-0.604838	-0.259973	0.339365	0.191505	0.0280786	0.456876	0.25558	-0.0765847	-0.298647	0.440167	0.882643	0.388252	0.515922
ENSG00000143149.12	ALDH9A1	black	M3	-0.124535	-0.500111	0.375526	-0.649651	-0.500337	-0.333996	-0.323464	0.570676	0.114185	0.303938	0.314822	0.776662	0.565824
ENSG00000164168.7	TMEM184C	turquoise	M1	0.193981	-0.686386	-0.218372	-0.851587	-0.31788	-0.309264	-0.159274	0.954591	0.659599	0.127152	-0.125676	0.712276	0.621686
ENSG00000115540.15	MOB4	turquoise	M1	0.150065	-0.719894	-0.216658	-0.89482	-0.371849	-0.27422	-0.0789273	0.95454	0.633839	0.129337	-0.0921495	0.733221	0.660637
ENSG00000168175.15	MAPK1IP1L	turquoise	M1	0.0340273	-0.812475	-0.3576	-0.846254	-0.277414	-0.180924	0.00995926	0.954525	0.582696	0.37214	-0.0800383	0.639892	0.701829
ENSG00000152382.6	TADA1	black	M3	0.144348	-0.528006	0.206882	-0.669783	-0.270746	-0.286847	-0.077514	0.782562	0.439347	0.0567082	0.20161	0.90124	0.624431
ENSG00000143190.23	POU2F1	black	M3	-0.352713	-0.485904	0.277586	-0.270182	-0.0944273	0.278883	0.196898	0.369609	0.23886	0.0876778	0.709558	0.798434	0.752704
ENSG00000083312.17	TNPO1	turquoise	M1	-0.0252205	-0.84713	-0.326151	-0.781621	-0.205581	-0.0591586	0.0727156	0.954513	0.640307	0.330642	0.0644496	0.726823	0.789615
ENSG00000198771.11	RCSD1	brown	M11	-0.360459	-0.230496	-0.466327	0.558802	0.903654	0.6949	0.7538	-0.093359	0.45395	0.151428	0.29786	-0.156534	0.194234
ENSG00000171262.11	FAM98B	turquoise	M1	0.0420114	-0.778344	-0.219657	-0.841523	-0.288115	-0.175861	0.00115589	0.954485	0.641763	0.267338	0.0371654	0.774533	0.760811
ENSG00000128050.8	PAICS	turquoise	M1	0.421076	-0.569239	-0.247969	-0.857999	-0.31244	-0.476117	-0.186241	0.954349	0.625192	0.0310648	-0.375522	0.591278	0.40851
ENSG00000143164.15	DCAF6	greenyellow	M7	-0.542967	-0.797461	-0.0282694	-0.464856	-0.177084	0.241701	0.150669	0.557814	0.101639	0.721198	0.601987	0.686186	0.895223
ENSG00000143147.14	GPR161	salmon	M9	-0.553734	-0.244196	-0.268135	0.457826	0.465293	0.560546	0.147097	-0.220011	-0.238799	0.468802	0.359461	-0.240758	0.135759
ENSG00000169288.18	MRPL1	turquoise	M1	0.222154	-0.6697	-0.20569	-0.788108	-0.214778	-0.244377	0.0626028	0.954111	0.724825	0.0648169	-0.0734334	0.757662	0.640124
ENSG00000213064.10	SFT2D2	black	M3	-0.0125745	-0.562284	0.299897	-0.717364	-0.478063	-0.297217	-0.297837	0.707489	0.145427	0.285047	0.285739	0.873839	0.64731
ENSG00000143196.5	DPT	red	M2	0.100527	0.591679	-0.0301036	0.628519	0.248203	0.0816489	-0.232149	-0.691098	-0.337362	-0.405806	-0.297932	-0.749018	-0.740773
ENSG00000143153.12	ATP1B1	red	M2	0.310242	0.739865	0.648268	0.33091	-0.121231	-0.383389	-0.20467	-0.527104	-0.485208	-0.337074	-0.0507028	-0.196755	-0.579884
ENSG00000140299.11	BNIP2	turquoise	M1	0.0428889	-0.782214	-0.221879	-0.813373	-0.260865	-0.135354	0.0781432	0.954039	0.666822	0.206407	0.0730433	0.790883	0.771509
ENSG00000164022.16	AIMP1	turquoise	M1	0.302489	-0.619684	-0.142331	-0.830551	-0.31125	-0.414499	-0.176568	0.954001	0.589422	0.107648	-0.18304	0.713412	0.5287
ENSG00000103342.13	GSPT1	turquoise	M1	0.4409	-0.56329	-0.23139	-0.821103	-0.279183	-0.447337	-0.167246	0.953914	0.647041	-0.0654207	-0.345338	0.615133	0.403457
ENSG00000086061.16	DNAJA1	turquoise	M1	0.396412	-0.59066	-0.297327	-0.771585	-0.197136	-0.350462	-0.0563326	0.953871	0.704848	-0.0431433	-0.30216	0.607229	0.447609
ENSG00000000460.17	C1orf112	green	M13	-0.604191	-0.581867	0.126723	-0.12634	0.0614846	0.321857	0.0677384	0.270163	-0.0486187	0.722713	0.702288	0.538402	0.718891
ENSG00000188404.9	SELL	tan	M8	0.257486	-0.514232	-0.450572	-0.53729	0.0241628	-0.132884	0.192642	0.750903	0.88216	-0.0421934	-0.275911	0.392908	0.390522
ENSG00000041357.16	PSMA4	turquoise	M1	0.0403751	-0.815436	-0.428654	-0.803308	-0.192097	-0.161554	0.0774139	0.95363	0.659749	0.356412	-0.115621	0.592989	0.679577
ENSG00000203667.10	COX20	turquoise	M1	0.347535	-0.580551	-0.11831	-0.841622	-0.339896	-0.401179	-0.191587	0.953624	0.655423	-0.0242762	-0.165661	0.745301	0.536562
ENSG00000000457.14	SCYL3	black	M3	0.0558005	-0.354443	0.466514	-0.521862	-0.332955	-0.203839	-0.0501169	0.544504	0.250137	-0.0923203	0.387472	0.925515	0.565868
ENSG00000075945.13	KIFAP3	purple	M6	-0.692349	-0.696568	-0.153223	-0.146547	0.0503598	0.56085	0.488284	0.295384	0.0523046	0.727557	0.696139	0.45303	0.81661
ENSG00000120370.12	GORAB	black	M3	-0.229945	-0.642084	-0.12669	-0.383852	-0.0824109	0.348896	0.26391	0.597959	0.518425	0.0636807	0.482558	0.722893	0.811246
ENSG00000119203.14	CPSF3	turquoise	M1	0.00519826	-0.81725	-0.28367	-0.806833	-0.223238	-0.155075	0.0714076	0.953575	0.634349	0.34674	0.0178909	0.721779	0.748223
ENSG00000007933.13	FMO3	salmon	M9	-0.529409	-0.183877	-0.277118	0.421826	0.397925	0.85693	0.785016	-0.237174	0.00199236	0.043597	0.528007	-0.0751685	0.305934
ENSG00000094963.14	FMO2	grey	M0	-0.266114	0.0776712	0.109967	0.363104	0.199555	0.22736	0.330721	-0.301757	-0.337084	0.106458	0.265483	-0.136436	-0.0742768
ENSG00000010932.17	FMO1	yellow	M12	-0.512708	-0.190055	-0.349605	0.44157	0.575207	0.697328	0.798537	-0.225724	0.0181352	0.275287	0.367561	-0.195807	0.208703
ENSG00000076258.10	FMO4	green	M13	-0.56169	-0.0285011	0.452094	0.399985	0.223855	0.457162	0.223058	-0.332711	-0.346239	0.157565	0.795565	0.246104	0.264739
ENSG00000012174.12	MBTPS2	turquoise	M1	-0.0146349	-0.828628	-0.233575	-0.784875	-0.25162	-0.101077	0.00386401	0.953553	0.583005	0.302952	0.107316	0.775804	0.785819
ENSG00000117533.15	VAMP4	purple	M6	-0.466867	-0.649788	0.140611	-0.459472	-0.302168	0.278747	0.18078	0.483001	0.146341	0.369709	0.694731	0.78805	0.888046
ENSG00000010165.20	EEF1AKNMT	magenta	M5	0.951069	0.433428	0.1538	-0.211707	-0.112651	-0.732474	-0.458021	0.200713	0.251665	-0.748003	-0.740864	0.00624702	-0.542253
ENSG00000135845.10	PIGC	black	M3	-0.161636	-0.353364	0.589906	-0.410407	-0.401928	-0.163802	-0.252779	0.381893	-0.0915375	0.133284	0.556305	0.834401	0.536163
ENSG00000094975.14	SUCO	purple	M6	-0.346605	-0.861752	-0.280115	-0.667936	-0.216759	0.200332	0.347384	0.737013	0.369619	0.468562	0.319361	0.672057	0.881895
ENSG00000122566.21	HNRNPA2B1	turquoise	M1	0.153575	-0.734786	-0.334931	-0.729203	-0.0932353	-0.131968	0.204621	0.953473	0.748222	0.151014	-0.0649437	0.696445	0.67082
ENSG00000076321.11	KLHL20	black	M3	-0.100828	-0.505205	0.388124	-0.489103	-0.337959	-0.0822279	-0.152685	0.586795	0.0998852	0.183824	0.514305	0.911291	0.677688
ENSG00000120334.15	CENPL	greenyellow	M7	-0.36157	-0.728672	-0.317718	-0.515706	-0.117404	0.0713098	0.115068	0.587758	0.299554	0.763846	0.174448	0.396435	0.679034
ENSG00000110422.12	HIPK3	turquoise	M1	0.370708	-0.584614	-0.16898	-0.832393	-0.33325	-0.352776	-0.136247	0.953421	0.668449	-0.103374	-0.189814	0.719962	0.521429
ENSG00000185278.15	ZBTB37	black	M3	-0.0903004	-0.340155	0.510205	-0.341962	-0.193839	-0.0336218	-0.0680056	0.431588	0.224366	-0.0400099	0.593386	0.909914	0.616791
ENSG00000135870.11	RC3H1	black	M3	-0.131039	-0.714912	0.0719715	-0.717368	-0.312608	-0.0434242	0.0370293	0.792816	0.494396	0.185526	0.368865	0.924037	0.842829
ENSG00000152061.23	RABGAP1L	black	M3	-0.23684	-0.157192	0.636939	-0.162219	-0.245893	0.0732777	0.0575099	0.138806	-0.0613648	0.0316092	0.720087	0.756612	0.523112
ENSG00000203737.4	GPR52	black	M3	-0.326861	-0.305162	0.223075	-0.0975716	-0.0261485	0.419373	0.410326	0.158092	0.00914822	0.0763374	0.641146	0.591442	0.597428
ENSG00000138785.15	INTS12	turquoise	M1	0.24811	-0.644809	-0.118407	-0.755832	-0.187062	-0.300548	-0.0368612	0.953419	0.667004	0.108469	-0.0299127	0.78755	0.621415
ENSG00000120333.4	MRPS14	black	M3	-0.335184	-0.726402	0.025276	-0.542402	-0.25729	0.127671	0.0538324	0.666706	0.300938	0.411777	0.52892	0.802777	0.872179
ENSG00000066044.15	ELAVL1	turquoise	M1	0.366123	-0.587254	-0.158863	-0.774942	-0.228039	-0.382387	-0.174701	0.953173	0.644496	0.032931	-0.187879	0.704896	0.505135
ENSG00000143207.21	COP1	black	M3	0.223986	-0.491171	0.0534867	-0.607651	-0.123143	-0.240586	-0.00793399	0.783112	0.720314	-0.0776779	0.0806354	0.814284	0.56995
ENSG00000075391.16	RASAL2	black	M3	-0.441951	-0.328412	0.181675	0.0885306	0.145325	0.529477	0.289028	0.102922	0.0345753	0.210984	0.778313	0.524973	0.626888
ENSG00000174574.16	AKIRIN1	turquoise	M1	0.24999	-0.69856	-0.451228	-0.750376	-0.103265	-0.16934	0.11631	0.95316	0.762614	0.09437	-0.23365	0.568283	0.56645
ENSG00000116194.13	ANGPTL1	pink	M4	-0.0193565	0.426966	0.702641	0.279149	-0.262078	-0.233782	-0.466542	-0.443693	-0.544267	-0.193309	0.251637	-0.0299318	-0.344567
ENSG00000109133.13	TMEM33	turquoise	M1	0.353735	-0.596633	-0.288625	-0.867379	-0.297239	-0.377152	-0.103387	0.952965	0.719063	-0.0147927	-0.304735	0.621529	0.498185
ENSG00000186283.14	TOR3A	red	M2	0.158015	0.328393	-0.238145	0.517787	0.549792	0.288873	0.633793	-0.335129	0.0656436	-0.323989	-0.15958	-0.413646	-0.354324
ENSG00000150459.12	SAP18	turquoise	M1	0.211369	-0.659625	-0.0806624	-0.859195	-0.403001	-0.355053	-0.182176	0.952952	0.583632	0.0918746	-0.0432869	0.791155	0.625486
ENSG00000075785.12	RAB7A	turquoise	M1	0.302323	-0.62918	-0.186809	-0.836043	-0.320439	-0.376053	-0.198176	0.952874	0.660582	-0.00292223	-0.190517	0.693049	0.5293
ENSG00000112339.14	HBS1L	turquoise	M1	0.0625994	-0.761567	-0.0879072	-0.833947	-0.334431	-0.222961	-0.0976196	0.952851	0.545378	0.223591	0.0910262	0.853599	0.746712
ENSG00000158417.11	EIF5B	turquoise	M1	0.385786	-0.580246	-0.222926	-0.798189	-0.249683	-0.368038	-0.0773168	0.952716	0.739458	-0.108458	-0.25438	0.675547	0.480559
ENSG00000135837.16	CEP350	purple	M6	-0.403108	-0.768549	0.038008	-0.502838	-0.15504	0.271864	0.251316	0.637107	0.365273	0.364897	0.629313	0.871018	0.94802
ENSG00000116260.17	QSOX1	grey	M0	-0.224654	0.199586	-0.345131	0.282176	0.0607038	0.383032	0.317468	-0.459625	-0.306228	0.0331322	-0.11593	-0.597454	-0.233456
ENSG00000230124.8	ACBD6	black	M3	0.363855	0.284162	0.584647	0.105661	-0.00991744	-0.113804	-0.0192874	0.0145041	0.0545574	-0.645352	0.25203	0.475444	-0.02521
ENSG00000135002.12	RFK	turquoise	M1	0.064647	-0.812062	-0.459903	-0.767027	-0.128053	-0.134706	0.0826036	0.952579	0.695902	0.3096	-0.123255	0.575306	0.666743
ENSG00000135835.12	KIAA1614	red	M2	0.259855	0.951818	0.514397	0.625939	-0.0175312	-0.142244	-0.297105	-0.849437	-0.59155	-0.569244	-0.109666	-0.549212	-0.805712
ENSG00000018510.15	AGPS	turquoise	M1	0.0359556	-0.809555	-0.390864	-0.810797	-0.225073	-0.117729	0.0489582	0.952316	0.688504	0.251418	-0.0557336	0.64679	0.71745
ENSG00000153029.14	MR1	green	M13	-0.418251	-0.355031	0.178706	0.147426	0.3694	0.30814	0.172866	0.0956155	0.15202	0.233228	0.603347	0.393571	0.421345
ENSG00000162783.10	IER5	magenta	M5	0.642927	0.659405	-0.171025	0.295182	0.259884	-0.250664	-0.0585259	-0.318687	0.0852573	-0.618846	-0.69636	-0.597501	-0.74003
ENSG00000135821.18	GLUL	tan	M8	0.241751	-0.577973	-0.520709	-0.404104	0.292056	-0.00299142	0.293774	0.786745	0.933899	-0.0536425	-0.195077	0.409284	0.436465
ENSG00000135828.11	RNASEL	salmon	M9	-0.52794	-0.332184	-0.216086	0.238945	0.376082	0.649645	0.455418	-0.113498	0.00843526	0.113105	0.406196	0.0138628	0.295503
ENSG00000093144.19	ECHDC1	turquoise	M1	0.0395917	-0.794145	-0.283014	-0.743064	-0.189129	-0.121464	0.050277	0.952236	0.663768	0.250121	0.0489338	0.724264	0.730398
ENSG00000136937.13	NCBP1	turquoise	M1	0.17029	-0.688345	-0.12682	-0.800738	-0.261039	-0.2406	-0.0272421	0.952222	0.633908	0.145352	0.00997451	0.819821	0.691153
ENSG00000113649.11	TCERG1	turquoise	M1	0.254332	-0.639112	-0.158218	-0.815611	-0.26583	-0.253469	0.046461	0.952122	0.660314	0.0518885	-0.0610613	0.792989	0.648659
ENSG00000135862.6	LAMC1	salmon	M9	-0.568034	-0.00504235	-0.280415	0.651812	0.440744	0.586804	0.178303	-0.486885	-0.31334	0.429159	0.300664	-0.538524	-0.0884562
ENSG00000058085.14	LAMC2	greenyellow	M7	-0.514538	-0.503825	-0.37858	-0.124357	0.120262	0.326923	0.282684	0.200002	0.0412963	0.874245	0.260468	0.0281121	0.495995
ENSG00000132963.8	POMP	turquoise	M1	0.103009	-0.797959	-0.493018	-0.748957	-0.0854655	-0.166011	0.10421	0.952008	0.698981	0.340913	-0.199945	0.526554	0.608662
ENSG00000116701.14	NCF2	tan	M8	0.293046	-0.464466	-0.413533	-0.460996	0.149596	-0.147622	0.134014	0.721193	0.97394	-0.177416	-0.274672	0.391368	0.343413
ENSG00000104064.17	GABPB1	turquoise	M1	0.172677	-0.738331	-0.407553	-0.774913	-0.176629	-0.161532	0.123935	0.951829	0.68927	0.169004	-0.174016	0.605498	0.607635
ENSG00000055044.11	NOP58	turquoise	M1	0.407985	-0.570323	-0.20422	-0.824089	-0.278877	-0.388901	-0.0642053	0.951615	0.622869	-0.0300748	-0.276742	0.674903	0.469475
ENSG00000148175.12	STOM	turquoise	M1	0.301836	-0.649878	-0.371691	-0.717172	-0.115232	-0.261383	0.0121428	0.951532	0.755787	0.0579387	-0.229437	0.578201	0.510996
ENSG00000116667.14	C1orf21	pink	M4	0.239811	0.275829	0.919363	-0.273547	-0.567942	-0.588542	-0.62712	0.00657588	-0.394926	-0.19131	0.197336	0.514985	-0.0463699
ENSG00000134717.18	BTF3L4	turquoise	M1	0.324667	-0.590962	-0.0733706	-0.858384	-0.361434	-0.416731	-0.209284	0.951527	0.656095	-0.0247963	-0.138291	0.780506	0.551801
ENSG00000172239.14	PAIP1	turquoise	M1	0.340624	-0.601388	-0.272365	-0.834671	-0.296029	-0.406903	-0.121111	0.951453	0.599984	0.141182	-0.27985	0.594904	0.487053
ENSG00000072849.11	DERL2	turquoise	M1	0.00325524	-0.816322	-0.247525	-0.786966	-0.224614	-0.0804764	0.0733316	0.951446	0.665208	0.211683	0.102977	0.78798	0.791228
ENSG00000121486.12	TRMT1L	grey	M0	-0.147735	-0.128321	0.12624	-0.0875704	0.07578	0.061219	-0.0300723	0.106376	0.188866	0.0471308	0.247264	0.281242	0.268717
ENSG00000116668.13	SWT1	purple	M6	-0.458375	-0.562572	0.176391	-0.251437	-0.0871294	0.354236	0.216626	0.368835	0.26802	0.136775	0.724654	0.739998	0.779273
ENSG00000143977.14	SNRPG	turquoise	M1	0.0738448	-0.794679	-0.445041	-0.81631	-0.226681	-0.147415	0.0218448	0.951423	0.66239	0.277373	-0.147225	0.583602	0.665215
ENSG00000143341.12	HMCN1	salmon	M9	-0.848653	-0.382559	-0.327865	0.306298	0.238564	0.818555	0.53477	-0.242143	-0.233632	0.627632	0.574601	-0.157469	0.415711
ENSG00000126261.13	UBA2	turquoise	M1	0.358463	-0.577556	-0.110758	-0.804916	-0.323735	-0.42861	-0.172958	0.95133	0.62206	0.0251124	-0.178497	0.720263	0.49672
ENSG00000132664.12	POLR3F	turquoise	M1	0.185362	-0.687189	-0.149575	-0.80787	-0.271693	-0.243254	-0.0542007	0.95122	0.617942	0.1163	-0.0211711	0.787349	0.662692
ENSG00000157181.16	ODR4	black	M3	0.0559412	-0.705423	-0.0130469	-0.768094	-0.329092	-0.132305	-0.0431092	0.89385	0.532872	0.111619	0.194286	0.903642	0.767883
ENSG00000262180.2	OCLM	black	M3	-0.271636	-0.625268	-0.17035	-0.382704	-0.0505789	0.332174	0.439366	0.521962	0.42909	0.0606143	0.392061	0.621516	0.729951
ENSG00000171497.5	PPID	turquoise	M1	0.228198	-0.679635	-0.2228	-0.789307	-0.228448	-0.278	-0.0686961	0.951147	0.720201	0.0044651	-0.126717	0.714565	0.582584
ENSG00000116711.10	PLA2G4A	black	M3	-0.168527	-0.597456	0.224215	-0.691462	-0.518006	-0.167295	-0.220331	0.631943	0.13299	0.239774	0.333303	0.789534	0.665909
ENSG00000090104.12	RGS1	yellow	M12	-0.543419	-0.506803	-0.605776	0.19769	0.533972	0.746342	0.732676	0.0889154	0.278696	0.410782	0.315953	-0.0564355	0.45801
ENSG00000231767.4	AL136454.1	purple	M6	-0.422914	-0.646458	-0.48239	-0.214267	0.213366	0.462506	0.565611	0.35957	0.385148	0.386795	0.21485	0.214918	0.577469
ENSG00000116741.8	RGS2	tan	M8	0.246302	-0.526184	-0.385032	-0.601973	-0.0377317	-0.213516	-0.00290739	0.777968	0.902009	-0.0691901	-0.2598	0.441851	0.416518
ENSG00000116750.13	UCHL5	black	M3	0.09802	-0.631579	0.0332963	-0.856554	-0.410022	-0.292243	-0.091405	0.873657	0.461544	0.198345	0.0920015	0.860442	0.712183
ENSG00000156017.13	CARNMT1	turquoise	M1	0.250027	-0.667484	-0.333694	-0.870028	-0.299842	-0.290343	0.0028315	0.950927	0.647229	0.112844	-0.241101	0.619077	0.569175
ENSG00000137955.16	RABGGTB	turquoise	M1	0.292687	-0.626166	-0.195815	-0.787073	-0.22298	-0.265016	0.064046	0.950918	0.667694	0.0407343	-0.116167	0.746654	0.59789
ENSG00000134371.13	CDC73	black	M3	-0.061178	-0.757097	-0.0511765	-0.779923	-0.332052	-0.0774423	0.0150121	0.880275	0.564344	0.195304	0.253914	0.889358	0.835429
ENSG00000134265.13	NAPG	turquoise	M1	0.0657713	-0.76807	-0.151723	-0.855923	-0.339195	-0.206913	-0.0639861	0.950889	0.56614	0.226862	0.0435553	0.810739	0.741792
ENSG00000066279.18	ASPM	greenyellow	M7	-0.708036	-0.478785	-0.230259	-0.0967125	-0.00840107	0.341125	0.194743	0.0424615	-0.235319	0.973144	0.374341	-0.00201778	0.480064
ENSG00000177888.7	ZBTB41	purple	M6	-0.544937	-0.862673	-0.162789	-0.598504	-0.282344	0.18293	0.108836	0.606147	0.146196	0.708844	0.436521	0.60197	0.8619
ENSG00000213047.13	DENND1B	purple	M6	-0.485935	-0.70765	-0.367412	-0.271373	0.0800621	0.577475	0.670969	0.457493	0.388276	0.411029	0.509989	0.479787	0.846019
ENSG00000120697.9	ALG5	turquoise	M1	0.0941251	-0.804564	-0.450334	-0.757696	-0.118927	-0.0820615	0.232367	0.950716	0.699164	0.217247	-0.116478	0.613304	0.665932
ENSG00000081237.20	PTPRC	tan	M8	0.143446	-0.59246	-0.517576	-0.500982	0.139299	-0.0269538	0.307274	0.759193	0.95634	0.0279439	-0.185471	0.400437	0.488303
ENSG00000124802.12	EEF1E1	turquoise	M1	0.368502	-0.589063	-0.232049	-0.849715	-0.317149	-0.411172	-0.170238	0.950683	0.640399	0.0227678	-0.276857	0.638602	0.483501
ENSG00000118197.14	DDX59	black	M3	0.142257	-0.338454	0.432353	-0.552946	-0.373237	-0.220132	-0.141995	0.602796	0.324574	-0.141689	0.362799	0.93069	0.576455
ENSG00000100664.11	EIF5	turquoise	M1	0.3188	-0.652316	-0.409655	-0.736006	-0.12726	-0.22069	0.134254	0.950557	0.75641	-0.00146531	-0.258915	0.574389	0.510627
ENSG00000163362.11	INAVA	red	M2	0.446122	0.84498	0.624121	0.104281	-0.409015	-0.558512	-0.517525	-0.538775	-0.581367	-0.449092	-0.313001	-0.300845	-0.69349
ENSG00000116852.14	KIF21B	tan	M8	-0.0261112	-0.452514	-0.675289	-0.0269471	0.535247	0.377412	0.794563	0.410592	0.724725	0.162732	-0.0654558	0.0662284	0.350379
ENSG00000116857.17	TMEM9	red	M2	-0.150101	0.713533	0.406801	0.739605	0.191046	0.0567032	-0.146694	-0.915675	-0.722601	-0.0513228	0.0926364	-0.628598	-0.654233
ENSG00000081277.12	PKP1	pink	M4	0.23916	0.544854	0.773415	-0.137151	-0.653649	-0.467346	-0.586195	-0.332583	-0.625625	-0.352566	0.00674762	0.0945461	-0.318605
ENSG00000159166.14	LAD1	red	M2	0.570434	0.661504	0.239511	-0.127135	-0.463224	-0.539339	-0.412196	-0.289479	-0.33777	-0.510917	-0.583554	-0.344064	-0.620047
ENSG00000174307.6	PHLDA3	red	M2	0.447962	0.959621	0.333989	0.53307	-0.0123935	-0.288908	-0.362832	-0.7403	-0.482678	-0.560213	-0.385572	-0.66399	-0.907731
ENSG00000159176.14	CSRP1	red	M2	0.174642	0.519247	0.555271	0.387651	-0.146519	-0.190322	-0.418595	-0.392781	-0.358089	-0.325933	0.149224	-0.0874035	-0.396905
ENSG00000035681.9	NSMAF	turquoise	M1	0.197988	-0.674609	-0.131942	-0.765339	-0.208127	-0.193557	0.0535348	0.95055	0.687818	0.0657698	0.0407312	0.831644	0.696569
ENSG00000198700.10	IPO9	black	M3	0.0210026	-0.600011	0.122054	-0.478065	-0.119842	-0.0408318	-0.0314093	0.745504	0.489497	0.0657969	0.352467	0.879485	0.685075
ENSG00000139625.13	MAP3K12	blue	M10	-0.321773	0.364944	0.0605984	0.934041	0.71526	0.631603	0.4033	-0.706138	-0.249794	-0.1552	0.401755	-0.413625	-0.264899
ENSG00000163431.13	LMOD1	red	M2	0.141083	0.654023	0.59093	0.533957	-0.0688934	-0.126155	-0.382938	-0.57357	-0.458072	-0.402576	0.160424	-0.208542	-0.505345
ENSG00000112078.14	KCTD20	turquoise	M1	0.0930078	-0.771176	-0.209123	-0.735131	-0.172628	-0.20142	-0.0548976	0.950421	0.647168	0.223263	0.0153691	0.743398	0.672015
ENSG00000176393.11	RNPEP	red	M2	0.0787937	0.607939	-0.0246305	0.58468	0.405681	-0.0343781	0.0822038	-0.673422	-0.306633	0.00959735	-0.326854	-0.754161	-0.682069
ENSG00000163435.16	ELF3	grey	M0	0.367974	0.279479	-0.111899	0.0458837	0.0172236	-0.138481	0.319469	-0.0519846	0.105452	-0.350105	-0.352459	-0.202546	-0.300058
ENSG00000143862.8	ARL8A	magenta	M5	0.791707	0.446386	0.154648	0.029836	0.0670546	-0.556757	-0.363922	0.0865305	0.377274	-0.721067	-0.527613	-0.0434202	-0.50392
ENSG00000143851.15	PTPN7	yellow	M12	-0.215663	-0.421806	-0.622183	0.138653	0.616342	0.573118	0.927476	0.220974	0.577669	0.123105	0.102934	0.00865357	0.349541
ENSG00000077157.22	PPP1R12B	pink	M4	-0.0297212	0.411658	0.797061	0.320257	-0.196125	-0.0589153	-0.296822	-0.379578	-0.369917	-0.322605	0.501348	0.229978	-0.126461
ENSG00000117139.17	KDM5B	black	M3	-0.35723	-0.350794	0.260736	-0.25572	-0.246972	0.249696	0.238712	0.176556	-0.143941	0.162967	0.544978	0.558859	0.546423
ENSG00000154174.7	TOMM70	turquoise	M1	0.452091	-0.543994	-0.211926	-0.83818	-0.283604	-0.483532	-0.18019	0.950368	0.67376	-0.0793888	-0.362573	0.621652	0.39445
ENSG00000117153.16	KLHL12	black	M3	-0.11007	-0.412095	0.213723	-0.20399	0.0489991	0.0378982	0.042909	0.438392	0.421042	-0.0498721	0.440219	0.678615	0.510486
ENSG00000159346.13	ADIPOR1	black	M3	0.0203731	-0.447389	0.121222	-0.730242	-0.491957	-0.280047	-0.174179	0.612196	0.452429	-0.016297	0.096394	0.672005	0.533527
ENSG00000159348.13	CYB5R1	pink	M4	0.570794	0.292991	0.637542	-0.447705	-0.662107	-0.705452	-0.629493	0.178573	-0.190129	-0.491099	-0.206197	0.395339	-0.190667
ENSG00000077147.16	TM9SF3	turquoise	M1	-0.013493	-0.83216	-0.288973	-0.849023	-0.314103	-0.153899	-0.020126	0.950214	0.571256	0.32522	0.0135139	0.710058	0.749579
ENSG00000198522.13	GPN1	turquoise	M1	0.108517	-0.763702	-0.285088	-0.815956	-0.280401	-0.218536	-0.0699021	0.950124	0.564882	0.292108	-0.0672252	0.6685	0.662751
ENSG00000029363.16	BCLAF1	turquoise	M1	0.0878031	-0.747039	-0.210541	-0.826873	-0.267686	-0.207819	0.00694671	0.949962	0.695703	0.189218	0.000453791	0.768858	0.718858
ENSG00000122176.12	FMOD	salmon	M9	-0.761496	-0.419187	-0.337789	0.114526	-0.0435356	0.657353	0.205735	-0.136031	-0.273859	0.536693	0.457461	-0.157128	0.382929
ENSG00000188783.6	PRELP	pink	M4	0.405675	0.771739	0.65575	0.22506	-0.353981	-0.52072	-0.681535	-0.518118	-0.533163	-0.552114	-0.202385	-0.266255	-0.705894
ENSG00000058668.14	ATP2B4	pink	M4	0.319426	0.336712	0.770322	-0.152066	-0.545871	-0.604066	-0.699066	-0.0321718	-0.386888	-0.19838	0.0750549	0.299561	-0.201111
ENSG00000122188.12	LAX1	yellow	M12	-0.373577	-0.11877	-0.32235	0.405812	0.476838	0.718185	0.87669	-0.199663	0.0930748	0.0107486	0.358249	-0.131497	0.201944
ENSG00000064313.12	TAF2	turquoise	M1	-0.015954	-0.822545	-0.224628	-0.831136	-0.285147	-0.116796	0.0474763	0.949946	0.596857	0.314325	0.0839637	0.79132	0.797141
ENSG00000143842.15	SOX13	red	M2	0.444426	0.917929	0.592683	0.494292	-0.0904403	-0.380062	-0.483764	-0.650278	-0.467083	-0.589665	-0.192506	-0.392619	-0.796848
ENSG00000143845.15	ETNK2	red	M2	0.416295	0.931254	0.604536	0.396681	-0.217701	-0.437307	-0.493335	-0.675814	-0.55056	-0.513083	-0.225535	-0.433414	-0.800315
ENSG00000133706.18	LARS	turquoise	M1	0.436068	-0.546453	-0.138199	-0.816907	-0.303634	-0.463972	-0.222933	0.94994	0.632463	-0.0793899	-0.282256	0.683851	0.425612
ENSG00000133056.13	PIK3C2B	pink	M4	0.463836	0.855126	0.848732	0.213651	-0.345576	-0.556079	-0.594727	-0.517093	-0.566535	-0.542588	-0.104856	-0.0962828	-0.642189
ENSG00000198625.13	MDM4	black	M3	0.222966	-0.133549	0.364368	-0.314643	-0.115013	-0.0940999	0.14075	0.425479	0.399237	-0.307564	0.304056	0.766243	0.427684
ENSG00000163531.15	NFASC	pink	M4	0.163649	0.725252	0.886971	0.406437	-0.116614	-0.242835	-0.373849	-0.593885	-0.605695	-0.378763	0.245802	0.00904977	-0.4388
ENSG00000174529.7	TMEM81	black	M3	0.12385	-0.0215293	0.455889	-0.245689	-0.277663	-0.222367	-0.432568	0.262898	0.230965	-0.193697	0.302209	0.577975	0.293504
ENSG00000004779.10	NDUFAB1	turquoise	M1	0.336274	-0.622015	-0.270796	-0.796076	-0.23215	-0.342394	0.00963985	0.949938	0.661625	0.0406093	-0.257217	0.633842	0.489928
ENSG00000133059.17	DSTYK	pink	M4	0.27362	0.644397	0.91496	0.159496	-0.347167	-0.468405	-0.517279	-0.429357	-0.574358	-0.395677	0.123144	0.0862044	-0.43906
ENSG00000163545.9	NUAK2	red	M2	0.198467	0.471039	0.315345	-0.000625339	-0.254746	-0.194492	-0.225038	-0.268369	-0.00553488	-0.350844	-0.0672265	-0.0605125	-0.207639
ENSG00000117266.15	CDK18	red	M2	-0.307613	0.433527	0.204502	0.667925	0.214586	0.508182	0.355276	-0.673494	-0.418078	-0.0327248	0.447317	-0.311158	-0.154578
ENSG00000174514.13	MFSD4A	pink	M4	0.490494	0.756695	0.876825	0.0774666	-0.420618	-0.640595	-0.671202	-0.364288	-0.44889	-0.525986	-0.0930237	0.0540885	-0.538416
ENSG00000111481.10	COPZ1	turquoise	M1	0.163677	-0.743393	-0.237657	-0.75846	-0.2114	-0.251585	-0.0510497	0.949913	0.58477	0.189074	-0.084548	0.683402	0.593321
ENSG00000158715.6	SLC45A3	red	M2	0.371549	0.920673	0.301555	0.676718	0.177255	-0.1358	-0.218364	-0.779643	-0.415314	-0.582576	-0.282364	-0.661486	-0.88118
ENSG00000142864.14	SERBP1	turquoise	M1	0.397541	-0.565068	-0.176317	-0.894193	-0.401519	-0.483014	-0.21219	0.949871	0.594193	-0.0245425	-0.316541	0.650767	0.442416
ENSG00000117280.13	RAB29	salmon	M9	-0.27059	-0.366427	-0.413849	0.292929	0.593329	0.539645	0.52893	0.153585	0.383199	0.288936	0.302233	0.039839	0.334642
ENSG00000133065.11	SLC41A1	magenta	M5	0.786323	0.0291533	0.00576557	-0.449396	-0.203896	-0.571452	-0.289047	0.546918	0.457396	-0.494014	-0.49792	0.303066	-0.105856
ENSG00000276600.5	RAB7B	pink	M4	0.129039	0.611336	0.887191	0.333639	-0.174583	-0.297832	-0.488372	-0.512014	-0.621104	-0.350954	0.246879	0.0474323	-0.415652
ENSG00000263961.8	RHEX	red	M2	0.151964	0.431478	0.638325	0.22906	-0.258963	-0.0602347	-0.122015	-0.294574	-0.254266	-0.538187	0.328853	0.183182	-0.174579
ENSG00000266028.7	SRGAP2	pink	M4	-0.049969	0.531299	0.889065	0.36543	-0.108698	-0.113243	-0.356418	-0.515621	-0.522151	-0.209637	0.461925	0.155221	-0.210192
ENSG00000263528.8	IKBKE	brown	M11	0.0151033	-0.0139261	-0.0281987	0.333378	0.610329	0.295607	0.425143	-0.000314148	0.298289	-0.148107	0.181777	0.152541	0.09202
ENSG00000138279.16	ANXA7	turquoise	M1	0.231736	-0.679237	-0.147376	-0.829049	-0.354823	-0.359313	-0.148571	0.949793	0.544075	0.121016	-0.121241	0.718858	0.561654
ENSG00000143486.16	EIF2D	pink	M4	0.269811	0.536407	0.95776	0.0636876	-0.443472	-0.461416	-0.577132	-0.283123	-0.492252	-0.408122	0.220494	0.278923	-0.287686
ENSG00000102580.15	DNAJC3	turquoise	M1	0.11633	-0.77991	-0.451882	-0.735697	-0.114537	-0.0620115	0.148933	0.949701	0.791103	0.0891561	-0.108393	0.622903	0.662199
ENSG00000153201.16	RANBP2	turquoise	M1	0.298494	-0.618633	-0.0600292	-0.808615	-0.306265	-0.362209	-0.130085	0.949636	0.645467	-0.0435757	-0.090906	0.80764	0.562173
ENSG00000134809.9	TIMM10	turquoise	M1	0.24241	-0.6822	-0.377653	-0.76834	-0.168683	-0.247562	0.0554014	0.949591	0.683172	0.150618	-0.221113	0.590198	0.557783
ENSG00000162892.15	IL24	purple	M6	-0.362136	-0.552225	-0.486743	-0.19578	0.0256252	0.610674	0.538169	0.31823	0.3233	0.117241	0.304455	0.226184	0.610007
ENSG00000162894.12	FCMR	brown	M11	-0.330815	-0.301971	-0.541857	0.480848	0.90337	0.694023	0.746054	-0.0237814	0.389801	0.200172	0.220373	-0.149712	0.212515
ENSG00000182795.13	C1orf116	pink	M4	0.206655	0.636804	0.877197	0.0162655	-0.588796	-0.469999	-0.664158	-0.451575	-0.682073	-0.358149	0.0713655	0.0365292	-0.410171
ENSG00000123836.15	PFKFB2	purple	M6	-0.293564	-0.525052	0.186158	-0.377322	-0.262744	0.271457	0.106404	0.419364	0.0786981	0.106627	0.58437	0.748952	0.721666
ENSG00000180667.10	YOD1	black	M3	-0.356123	-0.332883	0.40211	-0.453483	-0.592461	0.0732437	-0.148368	0.214245	-0.147435	0.0634761	0.539434	0.641855	0.572359
ENSG00000169139.12	UBE2V2	turquoise	M1	0.00243771	-0.820756	-0.322506	-0.868794	-0.307863	-0.172857	-0.0357023	0.949383	0.60594	0.323245	-0.0423246	0.679835	0.732255
ENSG00000203710.11	CR1	tan	M8	0.276231	-0.5344	-0.473066	-0.525023	0.114972	-0.149403	0.131934	0.787353	0.93318	-0.0705826	-0.296394	0.398861	0.390176
ENSG00000177189.14	RPS6KA3	turquoise	M1	0.0395237	-0.793487	-0.332921	-0.790647	-0.204992	-0.139745	0.0547781	0.949381	0.715529	0.284925	-0.017841	0.686338	0.728641
ENSG00000174059.16	CD34	red	M2	0.084327	0.744613	0.718435	0.556895	-0.0982146	-0.160834	-0.408448	-0.712936	-0.627066	-0.374474	0.19203	-0.262024	-0.576
ENSG00000076356.7	PLXNA2	red	M2	0.169092	0.591847	0.667091	0.228809	-0.383246	-0.111432	-0.382651	-0.459762	-0.490725	-0.499605	0.204628	0.00412467	-0.321905
ENSG00000196878.15	LAMB3	greenyellow	M7	-0.0559398	0.0123535	-0.184409	-0.103239	-0.0323933	-0.0865426	0.0203977	-0.014252	-0.129997	0.556333	-0.156829	-0.228176	0.00528293
ENSG00000123689.6	G0S2	magenta	M5	0.592579	0.0663449	-0.0591612	-0.254666	-0.151283	-0.457082	-0.340419	0.367327	0.367746	-0.441577	-0.476957	0.0997735	-0.203118
ENSG00000117594.10	HSD11B1	black	M3	0.174069	-0.201351	0.317879	-0.463158	-0.419182	-0.319912	-0.472892	0.408115	0.0679891	-0.190015	0.0719805	0.546447	0.23216
ENSG00000111906.17	HDDC2	turquoise	M1	0.3706	-0.568442	-0.0717029	-0.855397	-0.384435	-0.456089	-0.21921	0.949352	0.582165	-0.0271802	-0.181578	0.743464	0.497224
ENSG00000162757.4	C1orf74	purple	M6	-0.250841	-0.606952	-0.161769	-0.457279	-0.0387189	0.0536917	0.20114	0.532815	0.153847	0.716028	0.221522	0.455591	0.637974
ENSG00000117595.12	IRF6	pink	M4	0.187997	0.16914	0.748042	-0.426621	-0.653397	-0.551815	-0.543939	0.068148	-0.448708	-0.0311832	0.107645	0.449309	0.0219966
ENSG00000091527.15	CDV3	turquoise	M1	0.149911	-0.769186	-0.525448	-0.752624	-0.110962	-0.101248	0.114917	0.949293	0.758407	0.150168	-0.211246	0.532807	0.606774
ENSG00000117625.13	RCOR3	black	M3	-0.235757	-0.164812	0.637703	-0.188425	-0.255795	0.0686719	-0.0658723	0.154152	-0.0611762	0.0237159	0.715268	0.77494	0.542179
ENSG00000082512.15	TRAF5	salmon	M9	-0.606725	-0.351851	-0.221288	0.449086	0.577129	0.896043	0.702788	-0.0975823	0.139845	0.198502	0.700002	0.138792	0.486352
ENSG00000135521.9	LTV1	turquoise	M1	0.397954	-0.566972	-0.187326	-0.828143	-0.275834	-0.438829	-0.11389	0.949281	0.685192	-0.0596827	-0.287859	0.672179	0.453424
ENSG00000116752.6	BCAS2	turquoise	M1	0.0326647	-0.788585	-0.261944	-0.847331	-0.300957	-0.1877	0.0132332	0.949202	0.596743	0.294874	-0.00540608	0.725505	0.73446
ENSG00000143493.13	INTS7	black	M3	0.21016	-0.577123	0.110745	-0.779539	-0.349779	-0.324772	-0.150576	0.85814	0.427719	0.045917	0.0571935	0.876943	0.605081
ENSG00000143476.18	DTL	greenyellow	M7	-0.628409	-0.455287	-0.165511	-0.108341	0.00440205	0.263849	0.124707	0.0907365	-0.177388	0.961429	0.378323	0.064856	0.481693
ENSG00000066027.12	PPP2R5A	red	M2	0.652363	0.914466	0.443585	0.217371	-0.187084	-0.545804	-0.460767	-0.480947	-0.312259	-0.628486	-0.468876	-0.390468	-0.788194
ENSG00000065600.12	TMEM206	brown	M11	-0.114573	-0.365496	-0.564153	0.255464	0.828688	0.453946	0.676468	0.198619	0.448703	0.170786	0.0192472	-0.047115	0.203597
ENSG00000117691.10	NENF	red	M2	-0.0637861	0.597585	0.0665234	0.735667	0.310228	0.104778	0.057381	-0.771717	-0.569454	0.0193666	-0.100822	-0.769401	-0.676182
ENSG00000153250.20	RBMS1	turquoise	M1	0.0743555	-0.75744	-0.298401	-0.809882	-0.226709	-0.160913	0.0487093	0.948928	0.705254	0.254688	-0.0264263	0.707539	0.723354
ENSG00000211456.11	SACM1L	turquoise	M1	0.0830148	-0.751516	-0.156288	-0.788794	-0.227562	-0.160031	0.0150266	0.948887	0.654641	0.192351	0.0805232	0.827843	0.753198
ENSG00000117697.15	NSL1	purple	M6	-0.273999	-0.485804	0.137586	-0.179407	0.0303145	0.292032	0.273675	0.445255	0.420648	0.163181	0.666924	0.748399	0.748735
ENSG00000185728.17	YTHDF3	turquoise	M1	-0.0452968	-0.848002	-0.294373	-0.811756	-0.244524	-0.0758119	0.0406658	0.948883	0.630247	0.310282	0.0745725	0.747952	0.80024
ENSG00000155561.15	NUP205	turquoise	M1	0.297813	-0.608304	-0.018498	-0.835105	-0.350318	-0.402413	-0.169103	0.948869	0.543315	0.0783671	-0.0804631	0.814782	0.572213
ENSG00000174606.14	ANGEL2	black	M3	-0.135563	-0.637028	0.0863979	-0.603169	-0.222214	0.0462186	0.154482	0.723217	0.493916	0.205991	0.45471	0.905996	0.855194
ENSG00000035141.8	FAM136A	turquoise	M1	0.280339	-0.670438	-0.38331	-0.782776	-0.171734	-0.243666	0.0640655	0.948699	0.665592	0.133087	-0.238684	0.58072	0.545896
ENSG00000135829.17	DHX9	turquoise	M1	0.472857	-0.528667	-0.210817	-0.774875	-0.218234	-0.434662	-0.119066	0.948695	0.743549	-0.139384	-0.324129	0.641198	0.400549
ENSG00000143499.14	SMYD2	purple	M6	-0.351266	-0.656367	-0.113523	-0.338754	-0.0346447	0.244027	0.300996	0.475914	0.0565343	0.561804	0.387486	0.521108	0.672326
ENSG00000152104.12	PTPN14	pink	M4	-0.0704322	0.457558	0.929875	0.157375	-0.44038	-0.167508	-0.418108	-0.434633	-0.671554	-0.169625	0.485979	0.234119	-0.125433
ENSG00000117724.13	CENPF	greenyellow	M7	-0.732088	-0.477129	-0.310645	0.0115794	0.125131	0.453806	0.362422	0.00247097	-0.193263	0.981055	0.398121	-0.0614965	0.473036
ENSG00000082482.13	KCNK2	black	M3	-0.0648085	-0.320383	-0.0204612	-0.170761	0.0480431	0.0331733	0.0748055	0.325296	0.319538	0.0261433	0.207851	0.348117	0.327429
ENSG00000198042.11	MAK16	turquoise	M1	0.455288	-0.544719	-0.25627	-0.829632	-0.289514	-0.459821	-0.186776	0.94868	0.686388	-0.0889312	-0.384251	0.589769	0.38638
ENSG00000092978.11	GPATCH2	black	M3	-0.241578	-0.79802	-0.131672	-0.643758	-0.201527	0.171763	0.270741	0.759174	0.427694	0.306654	0.377435	0.813764	0.889347
ENSG00000170027.7	YWHAG	turquoise	M1	0.335814	-0.643684	-0.414414	-0.789434	-0.21894	-0.321149	-0.0968434	0.948625	0.668667	0.0824435	-0.353947	0.507207	0.448409
ENSG00000092969.12	TGFB2	purple	M6	-0.450491	-0.316532	-0.02385	-0.0862325	-0.205482	0.4647	0.203197	0.0501347	-0.138898	0.226087	0.516292	0.241864	0.483774
ENSG00000143353.12	LYPLAL1	black	M3	-0.491602	-0.31889	0.540238	-0.1529	-0.254688	0.234561	0.0430561	0.114787	-0.20925	0.262585	0.851821	0.706401	0.640114
ENSG00000147669.11	POLR2K	turquoise	M1	0.04826	-0.772479	-0.20331	-0.846327	-0.335057	-0.230593	-0.0603528	0.948464	0.541616	0.303679	0.00567364	0.740248	0.712314
ENSG00000162813.18	BPNT1	black	M3	-0.0214202	-0.414181	0.220727	-0.458727	-0.22171	-0.243257	-0.00918558	0.513591	0.0828101	0.325229	0.215483	0.614059	0.447348
ENSG00000166411.14	IDH3A	turquoise	M1	0.4339	-0.563104	-0.309073	-0.787191	-0.236509	-0.357062	-0.0210684	0.948457	0.709622	-0.0871655	-0.331379	0.591726	0.430929
ENSG00000118873.16	RAB3GAP2	purple	M6	-0.260148	-0.813465	-0.0693365	-0.584072	-0.127861	0.148303	0.20675	0.776491	0.444248	0.381384	0.447462	0.85911	0.905212
ENSG00000116141.15	MARK1	black	M3	0.0875842	-0.504376	0.0377005	-0.669398	-0.432129	-0.085662	-0.108741	0.693838	0.326127	-0.0514807	0.180213	0.747306	0.62559
ENSG00000162817.7	C1orf115	red	M2	0.332222	0.834744	0.701915	0.409447	-0.251967	-0.349144	-0.542121	-0.619534	-0.551562	-0.536043	-0.0296595	-0.264055	-0.670913
ENSG00000117791.16	MARC2	red	M2	0.436975	0.87434	0.609921	0.505205	-0.0333725	-0.339743	-0.387899	-0.597051	-0.412376	-0.600023	-0.104178	-0.310061	-0.72454
ENSG00000136630.13	HLX	tan	M8	0.093809	-0.523637	-0.566379	-0.245191	0.348532	0.128713	0.336303	0.636328	0.888254	0.119386	-0.0993867	0.269955	0.431347
ENSG00000143507.18	DUSP10	salmon	M9	-0.712284	-0.509544	-0.354924	0.174243	0.315049	0.774004	0.600426	0.0432055	0.0861454	0.565521	0.618637	0.0986176	0.610546
ENSG00000221823.11	PPP3R1	turquoise	M1	0.0960501	-0.731135	-0.14586	-0.879967	-0.35132	-0.295202	-0.0871471	0.948405	0.612707	0.243791	-0.01042	0.774816	0.700972
ENSG00000154305.18	MIA3	black	M3	-0.0623609	-0.57277	0.110251	-0.479401	-0.214434	-0.0521733	0.017573	0.675912	0.449154	0.102844	0.362872	0.798809	0.665046
ENSG00000137168.8	PPIL1	turquoise	M1	0.430603	-0.569521	-0.323052	-0.809167	-0.252744	-0.409142	-0.132345	0.948308	0.706701	-0.0456663	-0.384771	0.555735	0.403201
ENSG00000080608.10	PUM3	turquoise	M1	0.445469	-0.545891	-0.206562	-0.809574	-0.276509	-0.405856	-0.111429	0.948158	0.686305	-0.126482	-0.307859	0.6634	0.432486
ENSG00000154309.8	DISP1	pink	M4	-0.19839	0.136652	0.642695	0.33796	0.18054	0.0493884	-0.273476	-0.22729	-0.238997	-0.0266871	0.583159	0.310041	0.066088
ENSG00000187554.14	TLR5	black	M3	0.13632	-0.0425793	0.392056	0.0316574	0.169559	-0.112448	-0.167121	0.217938	0.26146	-0.188708	0.316657	0.492555	0.18
ENSG00000162909.18	CAPN2	red	M2	0.266453	0.339444	-0.0345548	0.375502	0.160203	0.0450891	0.0608727	-0.192092	-0.0515033	-0.185485	-0.080739	-0.271424	-0.303383
ENSG00000143514.17	TP53BP2	black	M3	-0.143652	-0.703155	-0.0954083	-0.557463	-0.142421	0.176684	0.264229	0.739812	0.523167	0.153755	0.401152	0.807981	0.841927
ENSG00000143756.12	FBXO28	black	M3	0.172558	-0.496722	0.295079	-0.835382	-0.530102	-0.469987	-0.390398	0.782226	0.265931	0.107352	0.10058	0.880915	0.566529
ENSG00000143753.13	DEGS1	pink	M4	0.0139004	-0.052439	0.685593	-0.461103	-0.563748	-0.478865	-0.534743	0.208834	-0.333244	0.231275	0.262261	0.585616	0.246177
ENSG00000143748.18	NVL	black	M3	0.245966	-0.0564902	0.694757	-0.363498	-0.348364	-0.318812	-0.262943	0.361598	0.015533	-0.263287	0.351638	0.842163	0.324326
ENSG00000143771.12	CNIH4	black	M3	0.22677	-0.464898	0.30341	-0.833323	-0.56122	-0.508813	-0.461905	0.783089	0.264843	0.0540699	0.0523152	0.863883	0.516761
ENSG00000162923.16	WDR26	black	M3	-0.411729	-0.304774	0.361672	-0.310961	-0.281774	0.160185	0.0842195	0.184055	-0.0543396	0.373561	0.642358	0.625542	0.658314
ENSG00000143815.15	LBR	tan	M8	0.146862	-0.698266	-0.406027	-0.633971	0.0414877	-0.142808	0.139994	0.89294	0.880847	0.150185	-0.131321	0.569116	0.58332
ENSG00000154380.17	ENAH	purple	M6	-0.69531	-0.77766	-0.608538	-0.229462	0.00471023	0.645236	0.43263	0.307718	0.151961	0.629154	0.349246	0.126214	0.707809
ENSG00000197965.12	MPZL1	turquoise	M1	0.308982	-0.659966	-0.331967	-0.780924	-0.227892	-0.304182	-0.133103	0.948146	0.658578	0.00233774	-0.272802	0.589525	0.481
ENSG00000143819.12	EPHX1	red	M2	0.217279	0.744369	0.638403	0.510634	-0.1259	-0.251888	-0.42876	-0.628283	-0.57211	-0.402937	0.0423825	-0.295024	-0.638474
ENSG00000196187.12	TMEM63A	red	M2	0.399435	0.914545	0.710817	0.533921	-0.00244242	-0.304264	-0.340395	-0.666604	-0.479146	-0.566499	-0.0374754	-0.260427	-0.705068
ENSG00000143811.19	PYCR2	magenta	M5	0.858629	0.752979	0.162926	0.161866	-0.0279111	-0.602022	-0.391933	-0.216696	0.00885302	-0.729118	-0.710981	-0.396482	-0.817135
ENSG00000140157.14	NIPA2	turquoise	M1	-0.00368168	-0.860397	-0.479427	-0.752181	-0.106484	-0.0559427	0.1112	0.947938	0.689566	0.35293	-0.0724433	0.591159	0.715029
ENSG00000145740.19	SLC30A5	turquoise	M1	0.100015	-0.747517	-0.186782	-0.786836	-0.250585	-0.187682	-0.0807939	0.947923	0.63457	0.149875	0.0186053	0.780567	0.698163
ENSG00000163528.13	CHCHD4	turquoise	M1	0.340891	-0.605394	-0.115844	-0.838582	-0.33692	-0.40993	-0.202227	0.947703	0.542171	0.0393808	-0.190294	0.722816	0.505544
ENSG00000104331.9	IMPAD1	turquoise	M1	0.0932745	-0.781961	-0.369881	-0.848621	-0.300883	-0.232261	-0.0721374	0.947428	0.573525	0.308346	-0.161642	0.594551	0.627988
ENSG00000143772.9	ITPKB	red	M2	0.270302	0.946517	0.445226	0.686987	0.134794	-0.174466	-0.242059	-0.846487	-0.527783	-0.442028	-0.168305	-0.628804	-0.850777
ENSG00000143801.17	PSEN2	red	M2	0.651433	0.750122	0.411128	0.390941	0.10117	-0.336816	-0.18244	-0.353557	-0.142457	-0.784476	-0.27439	-0.202216	-0.669579
ENSG00000163050.17	COQ8A	red	M2	0.442635	0.965446	0.530172	0.545468	0.00735738	-0.358189	-0.400518	-0.717769	-0.426864	-0.602471	-0.255902	-0.496801	-0.860982
ENSG00000143776.18	CDC42BPA	purple	M6	-0.362598	-0.41003	-0.105753	0.0108994	0.0705472	0.538069	0.235891	0.227488	0.240934	0.133104	0.582134	0.402527	0.60163
ENSG00000181450.17	ZNF678	purple	M6	-0.395858	-0.748005	0.0404155	-0.447552	-0.0977446	0.246298	0.24305	0.63214	0.341318	0.40608	0.631859	0.847395	0.923215
ENSG00000143740.14	SNAP47	red	M2	0.56475	0.969333	0.404735	0.497064	0.0844932	-0.403197	-0.316253	-0.655365	-0.335658	-0.62471	-0.423766	-0.549999	-0.907702
ENSG00000081692.12	JMJD4	red	M2	0.757684	0.857485	0.153895	0.262848	0.00123415	-0.496995	-0.291521	-0.414598	-0.157356	-0.674995	-0.701965	-0.546519	-0.885617
ENSG00000143816.8	WNT9A	red	M2	0.663783	0.744399	0.404352	0.193553	-0.21111	-0.556836	-0.594568	-0.335925	-0.294858	-0.612567	-0.449899	-0.318124	-0.751034
ENSG00000118600.11	RXYLT1	turquoise	M1	0.384014	-0.56715	-0.0714155	-0.787008	-0.273532	-0.411837	-0.136424	0.947312	0.628405	-0.0326539	-0.160582	0.768443	0.499818
ENSG00000143793.13	C1orf35	red	M2	0.537667	0.937129	0.307522	0.340699	-0.123544	-0.421437	-0.358284	-0.630221	-0.430988	-0.530052	-0.515769	-0.609302	-0.876664
ENSG00000162910.19	MRPL55	red	M2	0.226152	0.5285	0.512319	0.457354	0.197936	-0.189171	-0.0350107	-0.404357	-0.351709	-0.184149	0.0535321	-0.117512	-0.443725
ENSG00000143774.16	GUK1	red	M2	0.46597	0.685565	0.295387	0.0805084	-0.265862	-0.531946	-0.30732	-0.398104	-0.522333	-0.166997	-0.495828	-0.439924	-0.682056
ENSG00000198835.4	GJC2	red	M2	0.391361	0.961076	0.416259	0.51509	-0.0886367	-0.313794	-0.381914	-0.761096	-0.520329	-0.525017	-0.322677	-0.623889	-0.881972
ENSG00000181873.13	IBA57	red	M2	0.762488	0.900289	0.425373	0.203831	-0.170312	-0.595193	-0.435732	-0.411464	-0.248141	-0.732409	-0.553084	-0.360133	-0.837604
ENSG00000154358.21	OBSCN	red	M2	0.275611	0.955169	0.536847	0.572564	-0.0250777	-0.20306	-0.341521	-0.830002	-0.602133	-0.496484	-0.139114	-0.530256	-0.795902
ENSG00000154370.16	TRIM11	red	M2	0.563869	0.892393	0.187229	0.382516	0.0616645	-0.341422	-0.161689	-0.597059	-0.287737	-0.583846	-0.560297	-0.628738	-0.870856
ENSG00000168118.11	RAB4A	pink	M4	-0.101513	0.0684392	0.639419	-0.363467	-0.605901	-0.241382	-0.318288	-0.010428	-0.411667	0.0965245	0.338493	0.444546	0.229213
ENSG00000154429.11	CCSAP	pink	M4	-0.171954	0.327156	0.793403	0.018187	-0.346788	-0.195766	-0.342549	-0.34751	-0.535402	0.0976222	0.416798	0.238825	-0.000997277
ENSG00000114978.18	MOB1A	turquoise	M1	-0.0411005	-0.849236	-0.378409	-0.792646	-0.171517	-0.0691234	0.121136	0.947309	0.695531	0.357776	0.0233393	0.681273	0.784728
ENSG00000135776.5	ABCB10	grey	M0	0.214757	-0.119183	-0.446585	-0.14304	0.266282	-0.0852315	0.332052	0.241716	0.19966	0.233332	-0.406837	-0.142984	-0.0116458
ENSG00000113407.13	TARS	turquoise	M1	0.0980587	-0.79369	-0.449684	-0.808274	-0.218724	-0.176024	0.0252818	0.947289	0.674829	0.220032	-0.201802	0.562739	0.608477
ENSG00000174405.13	LIG4	turquoise	M1	0.0154585	-0.822275	-0.355384	-0.759379	-0.131908	-0.0695583	0.168132	0.947104	0.716369	0.258855	0.0138531	0.706259	0.75426
ENSG00000156928.4	MALSU1	turquoise	M1	0.263797	-0.625064	-0.0560212	-0.85453	-0.352137	-0.399391	-0.0967192	0.947075	0.563908	0.114078	-0.0911623	0.790029	0.583861
ENSG00000135775.14	COG2	black	M3	0.169	-0.496661	0.24369	-0.618499	-0.252404	-0.211494	-0.0227652	0.762281	0.469272	-0.0544481	0.254355	0.950498	0.635417
ENSG00000135744.8	AGT	red	M2	0.173502	0.34387	0.473523	0.10672	-0.270308	-0.354784	-0.395155	-0.23245	-0.373218	-0.20483	0.00277793	-0.0744731	-0.361655
ENSG00000119280.16	C1orf198	red	M2	0.0406206	0.538723	0.413955	0.380409	-0.230359	-0.00612739	-0.41313	-0.561638	-0.497226	-0.487684	0.0860025	-0.275543	-0.450617
ENSG00000143643.13	TTC13	purple	M6	-0.281373	-0.6959	-0.0718706	-0.441035	-0.0274112	0.27293	0.484869	0.614702	0.390888	0.266417	0.47358	0.765124	0.829244
ENSG00000173409.14	ARV1	black	M3	-0.18914	-0.734636	0.0591661	-0.771402	-0.392683	-0.137907	-0.0928248	0.758921	0.283647	0.391421	0.273278	0.823517	0.778517
ENSG00000182118.8	FAM89A	black	M3	-0.0480985	-0.305298	0.00549961	-0.615316	-0.54542	-0.085096	-0.14333	0.35267	-0.0870421	0.108899	0.0211448	0.363306	0.390513
ENSG00000021776.11	AQR	turquoise	M1	0.181027	-0.678643	-0.0406687	-0.7989	-0.301269	-0.252149	-0.0999813	0.946903	0.593462	0.069582	0.0660198	0.872804	0.690655
ENSG00000116906.13	GNPAT	black	M3	-0.281109	-0.510987	0.388672	-0.400174	-0.252748	0.0278722	-0.0334127	0.464539	0.0532681	0.295858	0.639581	0.843502	0.711534
ENSG00000116903.7	EXOC8	black	M3	0.507879	-0.16943	0.397464	-0.708353	-0.427301	-0.645312	-0.346499	0.672603	0.412146	-0.282545	-0.11138	0.790036	0.27732
ENSG00000139826.6	ABHD13	turquoise	M1	0.065123	-0.769352	-0.239227	-0.857966	-0.306118	-0.18329	-0.00432145	0.946882	0.650577	0.193251	-0.0146514	0.754045	0.726561
ENSG00000135766.9	EGLN1	red	M2	0.537478	0.907551	0.321376	0.330911	-0.0509661	-0.432383	-0.236574	-0.599938	-0.373004	-0.49257	-0.506408	-0.562648	-0.849734
ENSG00000116918.15	TSNAX	purple	M6	-0.176869	-0.769006	-0.0360417	-0.778127	-0.352685	-0.121286	0.0528968	0.80789	0.387196	0.463373	0.248246	0.80293	0.810601
ENSG00000162946.22	DISC1	purple	M6	-0.208306	-0.549967	-0.373519	-0.131066	0.326098	0.439893	0.569051	0.481777	0.676463	0.175857	0.355933	0.425777	0.663969
ENSG00000100916.14	BRMS1L	turquoise	M1	0.237963	-0.640481	-0.190915	-0.879446	-0.358345	-0.334597	-0.0855892	0.946881	0.636621	0.101648	-0.13864	0.719347	0.610742
ENSG00000212916.4	MAP10	red	M2	0.0502974	0.369385	0.0543313	0.228535	0.0339807	-0.0100002	0.0361424	-0.304477	-0.0226271	-0.11033	-0.0451001	-0.260286	-0.223048
ENSG00000135778.12	NTPCR	black	M3	-0.162205	-0.195012	0.526949	-0.0992353	-0.190101	0.138663	-0.100229	0.19153	-0.0815736	-0.0266358	0.669327	0.710541	0.481465
ENSG00000135749.19	PCNX2	pink	M4	-0.0908747	0.290024	0.857628	0.171065	-0.239821	-0.0271566	-0.191778	-0.261338	-0.398749	-0.192548	0.630025	0.439024	0.0847279
ENSG00000135750.14	KCNK1	purple	M6	-0.510414	-0.569907	-0.0625153	-0.439242	-0.385411	0.22099	0.139915	0.300345	-0.249574	0.62336	0.392241	0.366197	0.625435
ENSG00000136891.14	TEX10	turquoise	M1	0.204195	-0.687099	-0.152304	-0.812068	-0.293586	-0.229918	0.00683115	0.946713	0.582072	0.097479	-0.0318366	0.787761	0.650286
ENSG00000059588.10	TARBP1	pink	M4	0.152706	0.307178	0.690976	-0.0103871	-0.144323	-0.181043	0.011056	-0.116726	-0.25338	-0.196927	0.298168	0.415668	0.0285657
ENSG00000168264.10	IRF2BP2	red	M2	0.391611	0.88964	0.615406	0.359858	-0.148131	-0.422167	-0.464481	-0.629547	-0.508675	-0.415123	-0.186362	-0.362288	-0.715553
ENSG00000186660.15	ZFP91	turquoise	M1	0.127279	-0.733477	-0.170554	-0.811699	-0.292506	-0.261997	-0.130497	0.946682	0.606982	0.184642	-0.0148279	0.746684	0.66023
ENSG00000054267.22	ARID4B	black	M3	0.0966044	-0.246126	-0.115373	-0.253666	0.0615753	0.141933	0.39681	0.408888	0.686693	-0.259527	0.147191	0.468039	0.437519
ENSG00000152904.11	GGPS1	black	M3	-0.0440932	-0.678658	0.0346432	-0.724712	-0.355288	-0.163735	-0.164221	0.814087	0.483879	0.190487	0.258146	0.832343	0.742621
ENSG00000143669.13	LYST	black	M3	-0.151664	-0.40079	0.309588	-0.337199	-0.182179	0.0781992	-0.0563286	0.429965	0.359377	-0.0729602	0.537666	0.792441	0.62867
ENSG00000116962.15	NID1	salmon	M9	-0.634752	-0.288656	-0.512223	0.618845	0.787638	0.917771	0.687703	-0.2472	0.0900737	0.355727	0.450564	-0.280015	0.25324
ENSG00000077585.14	GPR137B	purple	M6	-0.618997	-0.800559	-0.410531	-0.208466	0.247195	0.564359	0.506165	0.42882	0.277144	0.680438	0.492765	0.383372	0.818655
ENSG00000086619.13	ERO1B	purple	M6	-0.287961	-0.640523	-0.404699	-0.246395	0.246756	0.491753	0.687176	0.525419	0.635031	0.21636	0.383773	0.49112	0.770147
ENSG00000107959.16	PITRM1	turquoise	M1	0.313632	-0.61259	-0.170568	-0.804833	-0.298268	-0.31353	-0.131429	0.946626	0.598778	0.0347027	-0.134194	0.724146	0.563987
ENSG00000158615.9	PPP1R15B	turquoise	M1	0.432203	-0.546543	-0.274439	-0.776023	-0.182283	-0.389637	-0.0217178	0.946567	0.729636	0.00500733	-0.316622	0.602146	0.440354
ENSG00000116984.13	MTR	black	M3	0.345343	-0.0704156	0.605834	-0.342602	-0.287608	-0.411684	-0.347886	0.430339	0.197865	-0.303705	0.217136	0.780025	0.239217
ENSG00000180875.5	GREM2	magenta	M5	0.859396	0.364316	0.194451	-0.376626	-0.364379	-0.796071	-0.553555	0.24701	0.237757	-0.643391	-0.672663	0.0648869	-0.432503
ENSG00000213585.11	VDAC1	turquoise	M1	0.150712	-0.74634	-0.354138	-0.846907	-0.279734	-0.296471	-0.112861	0.946527	0.563816	0.303709	-0.218321	0.572106	0.573531
ENSG00000054277.14	OPN3	greenyellow	M7	-0.58757	-0.760118	-0.379012	-0.222256	0.195004	0.388543	0.297566	0.420387	0.28095	0.80247	0.397468	0.31845	0.727461
ENSG00000203668.2	CHML	purple	M6	-0.244366	-0.820173	-0.143914	-0.704356	-0.251513	0.0426108	0.0218313	0.810448	0.471454	0.447008	0.324424	0.783915	0.885414
ENSG00000116161.17	CACYBP	turquoise	M1	0.334674	-0.605291	-0.217238	-0.812351	-0.274956	-0.417767	-0.154502	0.946498	0.611336	0.114286	-0.251523	0.632157	0.480949
ENSG00000138138.13	ATAD1	turquoise	M1	0.0796538	-0.742447	-0.0627657	-0.831444	-0.352935	-0.209225	-0.053351	0.94645	0.555151	0.148447	0.117248	0.874212	0.74929
ENSG00000163811.12	WDR43	turquoise	M1	0.472536	-0.522989	-0.206857	-0.821655	-0.284293	-0.446186	-0.158672	0.946417	0.677423	-0.108081	-0.339144	0.637504	0.408423
ENSG00000108061.11	SHOC2	turquoise	M1	0.0421294	-0.771935	-0.212455	-0.801819	-0.257433	-0.151049	0.00981784	0.946399	0.699475	0.202655	0.0637848	0.782963	0.755964
ENSG00000057608.17	GDI2	turquoise	M1	0.0347604	-0.812821	-0.368929	-0.806379	-0.212299	-0.214345	-0.0265344	0.946389	0.624712	0.374379	-0.110706	0.603812	0.656775
ENSG00000185420.19	SMYD3	salmon	M9	-0.636722	-0.266382	-0.134713	0.268091	0.218879	0.796767	0.695474	-0.170788	-0.091837	0.273602	0.669018	0.0935645	0.476039
ENSG00000079785.15	DDX1	turquoise	M1	0.184795	-0.683575	-0.0942415	-0.872587	-0.399644	-0.390129	-0.180705	0.94634	0.539444	0.161126	-0.0871773	0.756136	0.596894
ENSG00000162852.14	CNST	pink	M4	-0.322509	-0.146826	0.643096	-0.102878	-0.325007	0.116027	0.0072442	0.0169129	-0.296892	0.02713	0.710988	0.62056	0.413601
ENSG00000132676.16	DAP3	turquoise	M1	0.422379	-0.565664	-0.1656	-0.745514	-0.185548	-0.382025	-0.0828146	0.946284	0.681719	-0.0843756	-0.234712	0.695554	0.447873
ENSG00000109606.13	DHX15	turquoise	M1	0.257197	-0.625852	-0.0159927	-0.836318	-0.326642	-0.343812	-0.0876891	0.946191	0.587587	0.0590108	-0.0257725	0.857394	0.627276
ENSG00000107443.16	CCNJ	turquoise	M1	0.251102	-0.67979	-0.352066	-0.782122	-0.188536	-0.222413	0.0517303	0.946131	0.674554	0.105928	-0.195336	0.619972	0.571243
ENSG00000091164.13	TXNL1	turquoise	M1	0.136162	-0.705038	-0.14338	-0.861107	-0.334613	-0.252456	-0.0593048	0.946127	0.605493	0.143275	-0.00589076	0.797663	0.699982
ENSG00000162714.12	ZNF496	red	M2	0.293176	0.777692	0.103552	0.824639	0.503214	0.113141	0.131045	-0.710075	-0.208607	-0.545463	-0.181577	-0.636398	-0.7522
ENSG00000162711.17	NLRP3	tan	M8	0.0830308	-0.590369	-0.602002	-0.375187	0.228339	0.10049	0.173632	0.67269	0.851883	0.0277171	-0.196046	0.275985	0.425966
ENSG00000175137.11	SH3BP5L	red	M2	0.521229	0.937515	0.484231	0.372803	-0.129448	-0.434039	-0.391019	-0.650498	-0.441939	-0.657509	-0.403515	-0.488306	-0.874017
ENSG00000171161.13	ZNF672	magenta	M5	0.792107	0.836858	0.295051	0.186802	-0.0169513	-0.569012	-0.276913	-0.334319	-0.0975909	-0.671129	-0.621204	-0.358188	-0.793375
ENSG00000171163.15	ZNF692	red	M2	0.655373	0.77602	0.592207	0.25329	-0.100681	-0.428097	-0.376944	-0.345082	-0.255448	-0.795799	-0.242399	-0.0649675	-0.624377
ENSG00000107949.17	BCCIP	turquoise	M1	0.4867	-0.521853	-0.217795	-0.779492	-0.228268	-0.45478	-0.154037	0.946099	0.699344	-0.105148	-0.354141	0.614617	0.376232
ENSG00000180008.9	SOCS4	turquoise	M1	0.0204603	-0.805612	-0.288533	-0.82862	-0.279125	-0.109196	-0.00164695	0.946082	0.629486	0.222318	0.0181402	0.73443	0.754521
ENSG00000035115.21	SH3YL1	pink	M4	0.0340671	0.244527	0.935836	-0.130254	-0.452023	-0.363035	-0.486714	-0.0997532	-0.454314	-0.0842077	0.426425	0.529695	0.0659677
ENSG00000123505.16	AMD1	turquoise	M1	0.363745	-0.621799	-0.323964	-0.823896	-0.252433	-0.344505	-0.0434877	0.945958	0.634719	-0.0162089	-0.331229	0.585797	0.453768
ENSG00000189292.16	ALKAL2	magenta	M5	0.854048	0.217894	0.0252278	-0.438231	-0.294704	-0.716671	-0.437664	0.387327	0.345673	-0.53856	-0.691769	0.105096	-0.314486
ENSG00000151353.15	TMEM18	pink	M4	0.525995	0.318793	0.73454	-0.184267	-0.315122	-0.527003	-0.504836	0.153872	-0.0339814	-0.509327	0.0793306	0.536607	-0.0746781
ENSG00000130508.11	PXDN	salmon	M9	-0.594198	-0.563481	-0.628842	0.152656	0.437688	0.586382	0.288035	0.0759384	0.0821861	0.626169	0.162639	-0.192923	0.335177
ENSG00000166747.12	AP1G1	turquoise	M1	0.132523	-0.71623	-0.0703127	-0.798858	-0.274592	-0.196883	-0.0449707	0.945954	0.611776	0.0858232	0.0886479	0.880278	0.727496
ENSG00000171853.16	TRAPPC12	red	M2	0.530512	0.939901	0.303565	0.373402	-0.0471897	-0.398203	-0.304936	-0.647726	-0.373695	-0.565969	-0.509861	-0.613989	-0.884973
ENSG00000182551.14	ADI1	green	M13	-0.625073	-0.352973	0.146057	0.0708195	0.131935	0.514257	0.511353	0.0274992	-0.022858	0.477148	0.789911	0.429198	0.649041
ENSG00000163170.12	BOLA3	turquoise	M1	0.112238	-0.76833	-0.424891	-0.834298	-0.255076	-0.204422	-0.0225818	0.945784	0.663599	0.260275	-0.194551	0.56733	0.623119
ENSG00000165637.13	VDAC2	turquoise	M1	0.075865	-0.793042	-0.282683	-0.828986	-0.29581	-0.184808	0.000403859	0.94573	0.508137	0.271619	-0.0548858	0.685027	0.674251
ENSG00000008282.8	SYPL1	turquoise	M1	0.137565	-0.717015	-0.114319	-0.886781	-0.407648	-0.326227	-0.18118	0.945717	0.4828	0.204955	-0.0422334	0.763664	0.647327
ENSG00000155959.11	VBP1	turquoise	M1	0.0750448	-0.785952	-0.420827	-0.808171	-0.204026	-0.1813	0.0948855	0.945675	0.663876	0.329747	-0.145367	0.582703	0.652541
ENSG00000151692.15	RNF144A	salmon	M9	-0.73283	-0.429444	-0.406664	0.41551	0.65257	0.753092	0.536743	-0.146259	-0.0541008	0.684862	0.473848	-0.159806	0.363053
ENSG00000115738.10	ID2	black	M3	0.211245	-0.312791	0.440539	-0.618237	-0.391703	-0.515142	-0.469785	0.637657	0.263742	0.0769899	0.15458	0.815547	0.432733
ENSG00000134313.15	KIDINS220	black	M3	-0.102972	-0.613229	0.245343	-0.562204	-0.307827	-0.0722497	-0.145936	0.696946	0.363004	0.114231	0.4673	0.925316	0.744344
ENSG00000143797.12	MBOAT2	black	M3	-0.644695	-0.39017	0.361955	-0.221937	-0.373177	0.337304	0.0210967	0.0636759	-0.328769	0.433865	0.801793	0.55062	0.67651
ENSG00000151693.11	ASAP2	red	M2	-0.0485973	0.66614	0.765716	0.441964	-0.234438	-0.124549	-0.467446	-0.684521	-0.718763	-0.164037	0.298812	-0.16059	-0.413311
ENSG00000119185.12	ITGB1BP1	pink	M4	0.317969	0.266919	0.622113	-0.111933	-0.469061	-0.486953	-0.647859	0.0392842	-0.270145	-0.244643	0.0811723	0.28623	-0.15152
ENSG00000123353.10	ORMDL2	turquoise	M1	0.159758	-0.740882	-0.321444	-0.853577	-0.309163	-0.250141	-0.0815312	0.945656	0.609632	0.145295	-0.181918	0.634852	0.598327
ENSG00000134330.18	IAH1	purple	M6	-0.574363	-0.581564	-0.144257	-0.0810278	0.0453485	0.563176	0.355827	0.236748	0.0875256	0.497643	0.643302	0.3875	0.704947
ENSG00000119977.21	TCTN3	turquoise	M1	0.289601	-0.648259	-0.160647	-0.792429	-0.272278	-0.362709	-0.181392	0.945618	0.605987	0.0429593	-0.161647	0.70658	0.520496
ENSG00000132305.20	IMMT	turquoise	M1	0.0887724	-0.774256	-0.287175	-0.744815	-0.145055	-0.18732	0.0462846	0.945381	0.61467	0.296179	-0.0495592	0.686912	0.663982
ENSG00000058799.15	YIPF1	turquoise	M1	0.2063	-0.70349	-0.285816	-0.73327	-0.101891	-0.218126	0.138678	0.945151	0.77113	0.0800855	-0.117379	0.688343	0.597928
ENSG00000134317.18	GRHL1	pink	M4	-0.0999954	-0.0997087	0.661121	-0.451948	-0.633667	-0.233	-0.310895	0.156727	-0.348056	0.019058	0.393617	0.649272	0.34689
ENSG00000172059.11	KLF11	magenta	M5	0.725232	0.142388	0.0357566	-0.293321	-0.058803	-0.545796	-0.185755	0.42952	0.482652	-0.36439	-0.412073	0.211528	-0.127375
ENSG00000205795.4	CYS1	red	M2	0.284853	0.876175	0.529374	0.436002	-0.195839	-0.323361	-0.44657	-0.749422	-0.584171	-0.494969	-0.208408	-0.523806	-0.806807
ENSG00000171848.15	RRM2	greenyellow	M7	-0.654474	-0.449085	-0.315612	-0.0333994	0.0921522	0.349799	0.301479	0.0240748	-0.184906	0.975412	0.292846	-0.0919818	0.409234
ENSG00000115756.13	HPCAL1	tan	M8	0.49538	-0.0648365	-0.480435	0.0615475	0.558347	-0.0346311	0.263085	0.359039	0.769197	-0.342741	-0.418266	-0.0373094	-0.0887048
ENSG00000174953.14	DHX36	turquoise	M1	0.198303	-0.679376	-0.151658	-0.776046	-0.228004	-0.203994	0.113294	0.945066	0.678644	0.0396273	-0.0029599	0.810231	0.666844
ENSG00000064102.15	INTS13	turquoise	M1	0.0434612	-0.818175	-0.389684	-0.776388	-0.150234	-0.0850211	0.134514	0.944888	0.620063	0.289329	-0.0538047	0.655471	0.711492
ENSG00000143882.12	ATP6V1C2	pink	M4	0.080614	0.433471	0.900577	-0.0159637	-0.423204	-0.33945	-0.370995	-0.286915	-0.550139	-0.173173	0.304728	0.320216	-0.117638
ENSG00000239672.7	NME1	turquoise	M1	0.401629	-0.586174	-0.324851	-0.826555	-0.255045	-0.433486	-0.169408	0.944858	0.687034	0.00403288	-0.402737	0.539744	0.396634
ENSG00000162976.13	PQLC3	green	M13	-0.685352	-0.503079	0.0890617	-0.0469525	-0.00965173	0.470229	0.348908	0.117361	-0.104294	0.509162	0.77757	0.408403	0.670222
ENSG00000115761.16	NOL10	turquoise	M1	0.475403	-0.519727	-0.174092	-0.792433	-0.262887	-0.418363	-0.133681	0.944784	0.68008	-0.144001	-0.291488	0.672586	0.422405
ENSG00000128059.8	PPAT	turquoise	M1	0.342222	-0.608592	-0.208391	-0.84048	-0.305529	-0.396259	-0.123076	0.944774	0.568334	0.0950454	-0.25513	0.656198	0.491934
ENSG00000134324.11	LPIN1	black	M3	0.278329	0.141442	0.407864	0.0998778	-0.0117936	-0.0798199	0.0485159	0.0763457	-0.000864432	-0.464162	0.237252	0.366094	-0.00975442
ENSG00000071575.11	TRIB2	salmon	M9	-0.355528	-0.0879133	-0.0545258	0.457407	0.445687	0.647447	0.74036	-0.182924	-0.045087	0.117834	0.541335	0.059473	0.249275
ENSG00000162981.14	LRATD1	magenta	M5	0.654378	0.162186	0.141769	-0.594843	-0.5282	-0.662258	-0.380407	0.332726	0.0352385	-0.40426	-0.5436	0.191297	-0.171819
ENSG00000151779.13	NBAS	black	M3	-0.218279	-0.365493	0.483633	-0.232822	-0.229901	0.0830693	-0.137056	0.337582	0.00937847	0.0706018	0.660396	0.804913	0.586958
ENSG00000126067.12	PSMB2	turquoise	M1	0.271788	-0.664874	-0.296551	-0.79743	-0.197968	-0.301381	0.0834185	0.944681	0.615591	0.133104	-0.224262	0.626715	0.531216
ENSG00000197872.11	FAM49A	tan	M8	-0.00531273	-0.632081	-0.488892	-0.406446	0.224812	0.0658325	0.293433	0.704558	0.925751	0.173731	-0.0351039	0.399756	0.552995
ENSG00000102898.12	NUTF2	turquoise	M1	0.184477	-0.720621	-0.325459	-0.781817	-0.231887	-0.242071	-0.102561	0.944638	0.600158	0.184582	-0.150155	0.620077	0.589797
ENSG00000163029.16	SMC6	purple	M6	-0.563756	-0.858503	-0.233865	-0.418832	-0.031229	0.457444	0.335486	0.577975	0.299849	0.574078	0.580048	0.656816	0.955897
ENSG00000178295.15	GEN1	purple	M6	-0.675689	-0.818807	-0.444271	-0.256555	0.132832	0.585666	0.549227	0.415014	0.206751	0.731291	0.499939	0.354014	0.841525
ENSG00000170745.12	KCNS3	pink	M4	0.253426	0.369955	0.690377	0.107745	-0.117	-0.279112	-0.293874	-0.161733	-0.229072	-0.438857	0.20583	0.282077	-0.179433
ENSG00000240857.2	RDH14	red	M2	0.506349	0.854155	0.199231	0.278719	-0.086505	-0.425702	-0.251845	-0.55837	-0.357934	-0.377215	-0.56184	-0.617771	-0.818163
ENSG00000143867.7	OSR1	red	M2	0.69363	0.514486	0.564452	-0.120606	-0.374621	-0.734923	-0.6428	0.0136826	0.0319446	-0.606056	-0.333763	0.135819	-0.45536
ENSG00000183891.6	TTC32	black	M3	0.239881	0.0164626	0.664434	-0.437401	-0.46076	-0.397347	-0.244074	0.310122	0.0727102	-0.211265	0.26412	0.7492	0.291517
ENSG00000215251.4	FASTKD5	turquoise	M1	0.207582	-0.670096	-0.0690268	-0.786266	-0.253737	-0.245016	-0.00457477	0.94451	0.587595	0.0494223	0.0355726	0.854435	0.670505
ENSG00000170854.18	RIOX2	turquoise	M1	0.446761	-0.52264	-0.0834868	-0.844017	-0.34248	-0.475361	-0.208431	0.944499	0.641671	-0.130515	-0.252404	0.733232	0.446191
ENSG00000115884.11	SDC1	red	M2	0.315552	0.319401	0.257991	-0.352465	-0.619675	-0.477963	-0.447476	-0.0933969	-0.472361	-0.154614	-0.356455	-0.108347	-0.294448
ENSG00000055917.15	PUM2	black	M3	-0.227545	-0.584694	0.341021	-0.578244	-0.344717	-0.0180642	-0.0673616	0.602624	0.225919	0.219988	0.571533	0.954288	0.806235
ENSG00000143878.9	RHOB	red	M2	0.58402	0.887849	0.483393	0.300924	-0.125701	-0.546773	-0.572116	-0.51137	-0.401846	-0.54661	-0.422195	-0.406174	-0.812193
ENSG00000118960.13	HS1BP3	red	M2	0.155667	0.882265	0.605397	0.704485	0.150957	-0.085965	-0.256811	-0.834719	-0.531732	-0.47296	0.0698214	-0.424593	-0.698792
ENSG00000118961.15	LDAH	black	M3	-0.176813	-0.696505	0.106882	-0.539797	-0.147298	0.087687	0.201308	0.727451	0.362176	0.305973	0.513194	0.918263	0.856491
ENSG00000119771.15	KLHL29	red	M2	0.739294	0.797537	0.555384	0.044982	-0.35547	-0.68086	-0.635699	-0.28323	-0.298865	-0.627601	-0.453754	-0.165823	-0.698182
ENSG00000119778.15	ATAD2B	black	M3	0.00996273	-0.21848	0.516151	-0.430851	-0.345293	-0.0829371	-0.0376068	0.386611	0.104884	-0.0951227	0.471547	0.857808	0.555012
ENSG00000173960.14	UBXN2A	purple	M6	-0.27819	-0.577217	-0.100738	-0.539326	-0.343041	0.0115177	0.127795	0.447217	-0.0774694	0.522773	0.160142	0.409539	0.533821
ENSG00000163026.12	WDCP	black	M3	0.383242	-0.294005	0.271966	-0.558683	-0.314118	-0.358526	-0.307878	0.65866	0.406437	-0.369137	0.0252456	0.779861	0.349108
ENSG00000023909.10	GCLM	turquoise	M1	0.385453	-0.598139	-0.41416	-0.775923	-0.17875	-0.278453	0.0407171	0.944442	0.761214	-0.051216	-0.338736	0.538043	0.461513
ENSG00000219626.9	FAM228B	black	M3	-0.139821	0.0657844	0.50538	0.201221	-0.0290577	0.172308	0.0698775	-0.0663707	-0.0283019	-0.133467	0.62413	0.443922	0.255845
ENSG00000115129.14	TP53I3	salmon	M9	-0.619688	-0.0674158	-0.296142	0.705613	0.729263	0.778908	0.600233	-0.477274	-0.179536	0.377446	0.398619	-0.396418	0.0437703
ENSG00000198399.14	ITSN2	black	M3	-0.084184	-0.740285	-0.0986069	-0.697013	-0.23192	0.0450295	0.158837	0.824651	0.581379	0.133684	0.277302	0.859502	0.835746
ENSG00000084676.15	NCOA1	black	M3	0.177663	-0.404093	0.280648	-0.643471	-0.364606	-0.311999	-0.216116	0.695243	0.520403	-0.139666	0.20678	0.870322	0.561709
ENSG00000184924.5	PTRHD1	greenyellow	M7	-0.657046	-0.722384	-0.0716196	-0.343328	-0.0979809	0.258507	0.207541	0.364375	-0.0293597	0.858844	0.525219	0.451936	0.74325
ENSG00000138092.11	CENPO	greenyellow	M7	-0.432157	-0.502056	-0.386985	-0.108774	0.204786	0.176263	0.200405	0.199118	-0.0192253	0.877525	0.0770084	-0.0497219	0.331389
ENSG00000138031.14	ADCY3	red	M2	0.665519	0.779754	0.27109	0.383801	0.122573	-0.374305	-0.0911889	-0.386924	-0.118488	-0.670242	-0.428273	-0.374268	-0.755625
ENSG00000115137.11	DNAJC27	black	M3	-0.0141826	-0.481518	0.34673	-0.675984	-0.45677	-0.219572	-0.0976977	0.631557	0.208796	0.0659769	0.338298	0.889374	0.643424
ENSG00000084710.14	EFR3B	greenyellow	M7	-0.685217	-0.13913	0.0514257	0.218789	-0.00299746	0.426919	0.0598557	-0.338928	-0.464878	0.589046	0.488948	-0.144651	0.211884
ENSG00000115138.11	POMC	red	M2	0.311243	0.824096	0.393133	0.271087	-0.182553	-0.342841	-0.401877	-0.645228	-0.4847	-0.353663	-0.336699	-0.498296	-0.7061
ENSG00000087076.9	HSD17B14	blue	M10	-0.101556	0.613849	0.136874	0.932265	0.624239	0.308665	0.195026	-0.827266	-0.381134	-0.197312	0.0997738	-0.648635	-0.603779
ENSG00000138101.18	DTNB	red	M2	0.0686587	0.423117	0.590234	0.33632	0.0265399	0.0861729	0.0989942	-0.309462	-0.154475	-0.288087	0.453415	0.211321	-0.0351152
ENSG00000143970.16	ASXL2	black	M3	-0.0508331	-0.767016	-0.0137095	-0.760313	-0.290856	-0.13438	-0.0765173	0.879839	0.514866	0.248501	0.235266	0.880369	0.791647
ENSG00000099910.17	KLHL22	blue	M10	-0.344548	0.468322	0.268993	0.926679	0.544107	0.513005	0.280078	-0.791823	-0.423042	-0.0386221	0.472247	-0.389213	-0.302521
ENSG00000135823.14	STX6	turquoise	M1	0.271415	-0.640613	-0.2255	-0.76386	-0.175309	-0.252448	-0.0238655	0.944412	0.732851	0.00620144	-0.117181	0.722956	0.594919
ENSG00000136205.17	TNS3	blue	M10	-0.278175	0.291476	-0.132024	0.925075	0.803458	0.623585	0.429955	-0.612457	-0.0904884	-0.106294	0.279012	-0.497691	-0.278953
ENSG00000009335.18	UBE3C	turquoise	M1	0.289523	-0.647345	-0.166521	-0.762709	-0.236546	-0.278909	-0.0914183	0.944393	0.580979	0.0373968	-0.117057	0.736487	0.557943
ENSG00000123983.14	ACSL3	turquoise	M1	0.0209781	-0.809542	-0.326737	-0.769438	-0.188411	-0.128046	0.0376052	0.944378	0.663942	0.264071	-0.01103	0.679459	0.709393
ENSG00000138018.18	SELENOI	black	M3	0.192082	-0.57484	0.137747	-0.879224	-0.496471	-0.419592	-0.246761	0.854556	0.312186	0.120339	0.0136831	0.849384	0.589355
ENSG00000213699.9	SLC35F6	magenta	M5	0.703112	0.337465	0.518176	-0.294041	-0.332015	-0.817723	-0.644132	0.195131	0.0056519	-0.417077	-0.364153	0.238645	-0.344011
ENSG00000115163.15	CENPA	greenyellow	M7	-0.673612	-0.406666	-0.266597	-1.83764e-05	0.0883154	0.327677	0.187152	-0.0352793	-0.240501	0.963985	0.295139	-0.124165	0.361875
ENSG00000084764.11	MAPRE3	pink	M4	0.368418	0.710101	0.929702	0.0983086	-0.447701	-0.560166	-0.673815	-0.410159	-0.558897	-0.452553	0.0303963	0.0823236	-0.480578
ENSG00000119777.20	TMEM214	grey	M0	0.014413	-0.299437	-0.309139	-0.0231152	0.234898	-0.0728678	-0.105582	0.251537	0.15797	0.302916	-0.216917	-0.0711818	-0.00593225
ENSG00000084693.16	AGBL5	pink	M4	0.233546	0.519553	0.926504	0.0528786	-0.434747	-0.495393	-0.572658	-0.294574	-0.565772	-0.259661	0.194585	0.21169	-0.304126
ENSG00000129128.13	SPCS3	turquoise	M1	0.0497034	-0.810902	-0.495416	-0.760134	-0.11494	-0.0476739	0.213034	0.944281	0.761619	0.233516	-0.0988292	0.592485	0.70429
ENSG00000138080.13	EMILIN1	salmon	M9	-0.457833	-0.0785754	-0.577052	0.594922	0.735908	0.57948	0.500911	-0.377913	-0.0321545	0.46786	0.0183539	-0.629302	-0.115343
ENSG00000138028.16	CGREF1	magenta	M5	0.516139	0.138356	-0.0268063	-0.225864	-0.197696	-0.625253	-0.525385	0.189811	0.0665654	-0.0765555	-0.599379	-0.149816	-0.391031
ENSG00000139496.16	NUP58	turquoise	M1	0.0293297	-0.803689	-0.30894	-0.812483	-0.24368	-0.0915148	0.0240069	0.944074	0.601803	0.261105	0.00535528	0.722326	0.751124
ENSG00000151806.14	GUF1	turquoise	M1	0.412355	-0.534919	-0.059906	-0.839972	-0.31501	-0.445989	-0.142564	0.944022	0.617624	-0.0752304	-0.192633	0.768905	0.494738
ENSG00000138085.16	ATRAID	grey	M0	-0.220208	-0.144711	0.0631497	0.208357	0.216085	0.123193	0.300474	0.0101383	-0.038789	0.32317	0.31961	0.0927843	0.137546
ENSG00000084774.14	CAD	magenta	M5	0.873881	0.359077	0.162961	-0.145279	-0.052301	-0.643483	-0.358897	0.207928	0.164325	-0.642199	-0.638364	0.0411617	-0.491828
ENSG00000115204.15	MPV17	greenyellow	M7	-0.467553	-0.439694	-0.0613279	0.13438	0.400723	0.542282	0.551315	0.12553	-0.0131776	0.502327	0.57016	0.330473	0.529346
ENSG00000115207.13	GTF3C2	magenta	M5	0.856687	0.408895	0.535365	-0.348923	-0.350537	-0.809256	-0.543265	0.237687	0.0598079	-0.663347	-0.430467	0.336389	-0.343414
ENSG00000070831.17	CDC42	turquoise	M1	-0.0256331	-0.824578	-0.225522	-0.825676	-0.288195	-0.167915	-0.0467466	0.943778	0.592893	0.345684	0.0665195	0.750369	0.766083
ENSG00000115234.11	SNX17	magenta	M5	0.619667	0.412655	-0.140852	0.26821	0.412862	-0.336275	0.112561	-0.0819639	0.211193	-0.365512	-0.603758	-0.384861	-0.606008
ENSG00000163795.14	ZNF513	magenta	M5	0.845562	0.66756	0.207187	0.0122962	-0.0573225	-0.556075	-0.293385	-0.107334	0.0122036	-0.670096	-0.628353	-0.19934	-0.630463
ENSG00000119396.11	RAB14	turquoise	M1	0.134085	-0.708631	-0.0619085	-0.887489	-0.380529	-0.323856	-0.117127	0.943411	0.524321	0.176207	-0.00518679	0.824097	0.675045
ENSG00000110060.9	PUS3	turquoise	M1	0.391047	-0.579401	-0.192091	-0.852174	-0.315899	-0.453697	-0.170848	0.943369	0.61532	-0.0474326	-0.312749	0.646918	0.432341
ENSG00000157992.12	KRTCAP3	red	M2	0.52624	0.901209	0.505717	0.200731	-0.291969	-0.528957	-0.390951	-0.567924	-0.443019	-0.559017	-0.41288	-0.41688	-0.792301
ENSG00000138002.15	IFT172	pink	M4	-0.138375	0.418538	0.794141	0.459337	0.0101326	0.121776	-0.0985263	-0.470598	-0.468932	-0.224419	0.630148	0.219978	-0.071211
ENSG00000055130.17	CUL1	turquoise	M1	0.0109071	-0.792365	-0.122586	-0.793992	-0.278621	-0.133767	0.0333756	0.943285	0.551321	0.273316	0.15137	0.849112	0.790927
ENSG00000243943.10	ZNF512	black	M3	-0.42296	-0.472478	0.13697	-0.0129494	0.102121	0.50505	0.394768	0.274724	0.186947	0.15391	0.786432	0.649567	0.712864
ENSG00000101166.16	PRELID3B	turquoise	M1	0.0364037	-0.8018	-0.316514	-0.866554	-0.299173	-0.184885	0.0247823	0.943252	0.571956	0.313309	-0.0640491	0.673246	0.709259
ENSG00000119760.16	SUPT7L	black	M3	-0.257636	-0.683144	-0.248788	-0.295733	0.149107	0.413418	0.599502	0.574945	0.442421	0.248725	0.407775	0.621041	0.763372
ENSG00000156256.15	USP16	turquoise	M1	0.020443	-0.794784	-0.258147	-0.774047	-0.231514	-0.0393177	0.166651	0.943209	0.637616	0.206572	0.109613	0.791004	0.80004
ENSG00000091436.17	MAP3K20	turquoise	M1	0.239668	-0.646169	-0.137731	-0.82788	-0.380708	-0.33517	-0.229416	0.943145	0.576952	0.0548594	-0.0893515	0.731629	0.584256
ENSG00000158019.20	BABAM2	purple	M6	-0.707833	-0.704973	-0.348794	-0.113222	0.140526	0.625257	0.592646	0.266205	0.146629	0.72141	0.582969	0.291401	0.768321
ENSG00000075426.12	FOSL2	magenta	M5	0.671801	0.0632853	-0.231488	-0.475262	-0.171861	-0.415016	0.0933798	0.427316	0.424484	-0.343996	-0.618039	0.0913856	-0.0967376
ENSG00000142507.10	PSMB6	turquoise	M1	0.332304	-0.615248	-0.243785	-0.80836	-0.228226	-0.404901	-0.0520114	0.943077	0.614721	0.108458	-0.284549	0.619584	0.469698
ENSG00000120805.14	ARL1	turquoise	M1	0.0404013	-0.774642	-0.159155	-0.865806	-0.391087	-0.239592	-0.104089	0.943013	0.522466	0.260693	0.0279932	0.773814	0.718641
ENSG00000171103.11	TRMT61B	black	M3	0.194826	-0.110535	0.577474	-0.53326	-0.563465	-0.377491	-0.293053	0.412044	0.09853	-0.174421	0.235376	0.785653	0.360279
ENSG00000197771.12	MCMBP	turquoise	M1	0.475931	-0.516088	-0.216149	-0.835714	-0.28742	-0.500641	-0.197067	0.942895	0.663962	-0.0315279	-0.383995	0.59514	0.378267
ENSG00000115295.20	CLIP4	pink	M4	-0.0931584	-0.108318	0.75433	-0.392428	-0.497395	-0.309636	-0.382024	0.1898	-0.308044	0.141659	0.455962	0.714152	0.358914
ENSG00000119801.13	YPEL5	purple	M6	-0.648103	-0.794992	-0.242141	-0.337445	-0.027728	0.536752	0.516994	0.45448	0.314176	0.567107	0.643463	0.557182	0.931226
ENSG00000166341.8	DCHS1	blue	M10	-0.0198363	0.628385	0.0322052	0.924218	0.586997	0.329097	0.0817425	-0.806252	-0.35344	-0.332398	-0.00408223	-0.704462	-0.651673
ENSG00000165006.14	UBAP1	turquoise	M1	0.133935	-0.726421	-0.230812	-0.768256	-0.228238	-0.154873	0.0698904	0.942881	0.713585	0.0908686	0.0132452	0.749302	0.691686
ENSG00000037241.7	RPL26L1	turquoise	M1	0.086889	-0.770137	-0.40983	-0.821944	-0.225904	-0.189173	-0.00663067	0.942856	0.633193	0.310503	-0.147791	0.584484	0.654902
ENSG00000013016.16	EHD3	yellow	M12	-0.305867	-0.38029	-0.644684	0.291223	0.605621	0.737343	0.692855	0.0719752	0.312845	0.0815477	0.170698	-0.120404	0.284848
ENSG00000158125.10	XDH	grey	M0	0.223464	-0.0942496	-0.0787495	-0.198714	0.0137749	-0.103308	0.395943	0.258251	0.173999	-0.103726	-0.152514	0.179759	0.066729
ENSG00000162959.13	MEMO1	black	M3	0.271287	0.0193203	0.325109	-0.29724	-0.196544	-0.130322	0.0924008	0.271893	0.220828	-0.347956	0.124999	0.566334	0.250513
ENSG00000116977.18	LGALS8	turquoise	M1	0.150753	-0.689472	-0.0760988	-0.838028	-0.319283	-0.280168	-0.116186	0.942848	0.65384	0.0976088	0.0224186	0.838194	0.68906
ENSG00000148153.14	INIP	turquoise	M1	0.099822	-0.758664	-0.177587	-0.817561	-0.250763	-0.284432	-0.0312625	0.942822	0.527841	0.295225	-0.0526544	0.731098	0.642297
ENSG00000108588.14	CCDC47	turquoise	M1	0.451039	-0.524657	-0.205871	-0.863456	-0.35713	-0.519455	-0.179211	0.942739	0.62224	-0.0177825	-0.377561	0.596033	0.384789
ENSG00000175054.16	ATR	turquoise	M1	0.0772667	-0.760158	-0.183388	-0.772861	-0.226797	-0.0976794	0.103507	0.942616	0.650154	0.139475	0.0936481	0.828985	0.761541
ENSG00000119820.11	YIPF4	black	M3	0.0861905	-0.198222	0.492475	-0.417263	-0.336993	-0.14107	-0.0264692	0.424901	0.214308	-0.152082	0.418099	0.84386	0.51075
ENSG00000115760.14	BIRC6	black	M3	-0.00408704	-0.659531	0.144008	-0.649509	-0.25388	-0.075793	-0.0186159	0.806203	0.45447	0.0958051	0.353904	0.967178	0.775634
ENSG00000023318.8	ERP44	turquoise	M1	-0.00270854	-0.809662	-0.271136	-0.804401	-0.246066	-0.123844	-0.0084603	0.942607	0.663379	0.259219	0.0460098	0.740701	0.76434
ENSG00000049323.16	LTBP1	salmon	M9	-0.760896	-0.33061	-0.366537	0.300284	0.103193	0.755874	0.385589	-0.261169	-0.203068	0.404735	0.445805	-0.254793	0.281253
ENSG00000152689.18	RASGRP3	purple	M6	-0.359608	-0.572223	-0.50183	0.156125	0.64991	0.635031	0.588316	0.330014	0.577954	0.302906	0.397308	0.227874	0.579349
ENSG00000169016.17	E2F6	turquoise	M1	0.226723	-0.673724	-0.229521	-0.742643	-0.178785	-0.162012	0.0769488	0.942554	0.645216	0.028247	-0.0551075	0.751071	0.636194
ENSG00000150938.10	CRIM1	red	M2	0.305835	0.403859	0.536005	0.146345	-0.299192	-0.258483	-0.473675	-0.160015	-0.242866	-0.438786	0.104869	0.111135	-0.265877
ENSG00000147687.19	TATDN1	turquoise	M1	0.263187	-0.614716	-0.0262438	-0.82847	-0.318296	-0.387948	-0.148818	0.942541	0.569475	0.0733073	-0.050143	0.816838	0.595295
ENSG00000205221.12	VIT	pink	M4	0.201573	0.657225	0.74499	0.220437	-0.337891	-0.429449	-0.544768	-0.529609	-0.598609	-0.334593	0.00922227	-0.163338	-0.553961
ENSG00000115808.12	STRN	purple	M6	-0.314136	-0.792257	0.00768022	-0.764051	-0.441081	-0.0208055	-0.0707349	0.742837	0.284186	0.461177	0.382797	0.817646	0.876365
ENSG00000008869.12	HEATR5B	black	M3	-0.137471	-0.340282	0.620935	-0.427104	-0.398727	-0.164907	-0.280432	0.391187	-0.0882915	0.107081	0.560584	0.877391	0.556334
ENSG00000152133.14	GPATCH11	black	M3	-0.233326	-0.677474	0.0419912	-0.491578	-0.149714	-0.00233751	-0.0120296	0.645264	0.32879	0.451872	0.410654	0.724831	0.734233
ENSG00000169251.12	NMD3	turquoise	M1	0.0370456	-0.786337	-0.158469	-0.737331	-0.191452	-0.144679	0.00574547	0.942371	0.566682	0.237184	0.108711	0.810532	0.738321
ENSG00000218739.10	CEBPZOS	black	M3	0.231119	-0.47706	0.18153	-0.834422	-0.527444	-0.430204	-0.288673	0.809444	0.286297	0.139414	0.0393972	0.827459	0.56614
ENSG00000065911.12	MTHFD2	turquoise	M1	0.346859	-0.633103	-0.434346	-0.756781	-0.137862	-0.291805	0.0345413	0.942357	0.732939	0.0396954	-0.364532	0.508523	0.440954
ENSG00000003509.16	NDUFAF7	black	M3	0.0501845	-0.593134	0.155952	-0.551624	-0.102569	-0.0678258	0.0693706	0.772636	0.461315	0.081144	0.360115	0.943336	0.73387
ENSG00000115825.10	PRKD3	purple	M6	-0.669219	-0.740155	0.0195425	-0.245488	-0.0112923	0.417135	0.29058	0.401172	0.105405	0.710803	0.767774	0.641739	0.886445
ENSG00000115828.17	QPCT	pink	M4	-0.0398034	0.0992454	0.831199	-0.210732	-0.542324	-0.371939	-0.488986	-0.00891002	-0.315711	-0.0727167	0.41141	0.521092	0.115385
ENSG00000163171.7	CDC42EP3	black	M3	0.0588173	-0.317981	0.0119533	-0.11629	0.166226	0.155207	0.138505	0.418877	0.566522	-0.263971	0.289437	0.543218	0.418734
ENSG00000135698.10	MPHOSPH6	turquoise	M1	0.196525	-0.694639	-0.284536	-0.823083	-0.265215	-0.223446	0.0812027	0.942266	0.626522	0.115272	-0.137667	0.683311	0.620086
ENSG00000119787.14	ATL2	pink	M4	0.23002	-0.164273	0.645743	-0.61389	-0.57149	-0.518861	-0.485417	0.476147	-0.0557168	-0.0706319	0.19039	0.827029	0.338026
ENSG00000143889.16	HNRNPLL	purple	M6	-0.447938	-0.69456	-0.183259	-0.377364	0.0248253	0.365896	0.54265	0.511219	0.337821	0.579302	0.515061	0.599275	0.861542
ENSG00000143891.17	GALM	brown	M11	-0.484403	-0.0302761	-0.236938	0.726972	0.809733	0.565311	0.460239	-0.423144	-0.113156	0.383525	0.28651	-0.406309	-0.082378
ENSG00000117523.16	PRRC2C	turquoise	M1	0.0968373	-0.753872	-0.306903	-0.780308	-0.213866	-0.135143	0.03677	0.942223	0.710688	0.14572	-0.0335164	0.705747	0.697376
ENSG00000115514.12	TXNDC9	turquoise	M1	0.0558821	-0.817545	-0.476776	-0.799591	-0.180461	-0.16151	0.0681444	0.942187	0.623712	0.351894	-0.180499	0.532214	0.632053
ENSG00000163214.21	DHX57	black	M3	0.133127	-0.599115	0.102594	-0.649658	-0.224566	-0.209438	0.0380581	0.842706	0.515366	0.0935206	0.209654	0.897701	0.669188
ENSG00000141378.14	PTRH2	turquoise	M1	0.431897	-0.55226	-0.191684	-0.802779	-0.266317	-0.407169	-0.115588	0.942164	0.659682	-0.0822245	-0.294511	0.665225	0.433225
ENSG00000115904.12	SOS1	purple	M6	-0.480236	-0.686394	0.018713	-0.476394	-0.22964	0.249287	0.158054	0.512297	0.137284	0.549433	0.610316	0.693181	0.882703
ENSG00000011566.15	MAP4K3	black	M3	0.0433796	-0.195942	0.563582	-0.441372	-0.385282	-0.151596	-0.164719	0.396882	0.0714289	-0.0797799	0.463649	0.864583	0.530059
ENSG00000138050.15	THUMPD2	black	M3	0.0791913	-0.591056	-0.0831081	-0.613179	-0.193821	0.0389807	0.206766	0.758976	0.488315	0.0230952	0.207622	0.78811	0.708985
ENSG00000183023.18	SLC8A1	black	M3	0.0840876	-0.397458	0.188372	-0.414752	-0.0563679	-0.218883	-0.100047	0.595109	0.575519	-0.00163307	0.21208	0.723425	0.49293
ENSG00000162878.13	PKDCC	red	M2	0.292163	0.525444	0.23527	0.299719	-0.0250794	-0.412986	-0.566923	-0.374777	-0.436214	-0.0556188	-0.34014	-0.454145	-0.641818
ENSG00000185651.14	UBE2L3	turquoise	M1	0.303001	-0.616862	-0.266216	-0.839351	-0.29294	-0.401839	-0.152145	0.942148	0.635628	0.143578	-0.269337	0.600125	0.49775
ENSG00000121073.14	SLC35B1	turquoise	M1	0.432006	-0.564947	-0.304123	-0.714802	-0.0864953	-0.341811	0.0373591	0.942058	0.787377	-0.085579	-0.312118	0.604736	0.4259
ENSG00000057935.13	MTA3	pink	M4	0.0626009	0.426248	0.953026	0.0410103	-0.413716	-0.272619	-0.447063	-0.273181	-0.525629	-0.220507	0.439289	0.398692	-0.0494566
ENSG00000162881.6	OXER1	red	M2	0.318837	0.863625	0.518209	0.622728	0.134162	-0.1574	-0.179191	-0.672972	-0.333776	-0.465888	-0.0101338	-0.365937	-0.652686
ENSG00000162882.15	HAAO	red	M2	0.19124	0.894577	0.524819	0.698582	0.192708	-0.119699	-0.160193	-0.831541	-0.520425	-0.381805	-0.0269832	-0.51366	-0.748577
ENSG00000152518.8	ZFP36L2	magenta	M5	0.805965	0.589359	0.452682	-0.108994	-0.19134	-0.792442	-0.573612	-0.0197801	0.0265043	-0.62274	-0.522785	-0.00302958	-0.573373
ENSG00000105879.12	CBLL1	turquoise	M1	0.206353	-0.651214	-0.0277177	-0.855305	-0.358305	-0.341976	-0.113305	0.941966	0.595238	0.0821364	-0.00461401	0.847884	0.652539
ENSG00000152527.14	PLEKHH2	pink	M4	-0.334358	0.198316	0.732807	0.34678	-0.00839471	0.187213	-0.0523137	-0.365148	-0.471954	0.0163121	0.754569	0.316736	0.131718
ENSG00000138036.18	DYNC2LI1	pink	M4	-0.364285	-0.13007	0.709868	-0.0894972	-0.307871	0.0873119	-0.104676	0.012616	-0.361992	0.180624	0.793152	0.663384	0.470988
ENSG00000171865.10	RNASEH1	turquoise	M1	0.358756	-0.585733	-0.143927	-0.792591	-0.274772	-0.401196	-0.127981	0.941952	0.597256	0.0589458	-0.19217	0.696911	0.494246
ENSG00000138032.21	PPM1B	purple	M6	-0.351124	-0.697167	0.110852	-0.565031	-0.24783	0.149577	0.175336	0.626896	0.333995	0.352994	0.578505	0.875159	0.908024
ENSG00000138078.15	PREPL	black	M3	0.193463	-0.354757	0.438353	-0.660351	-0.484935	-0.366079	-0.347295	0.656662	0.302399	-0.160749	0.238683	0.92376	0.520525
ENSG00000143919.15	CAMKMT	black	M3	-0.00564721	-0.265633	0.440119	-0.415845	-0.32851	-0.0245981	-0.0463238	0.410941	0.167224	-0.106652	0.471722	0.844765	0.577134
ENSG00000170577.8	SIX2	greenyellow	M7	-0.10427	-0.210565	-0.454076	0.0215385	0.214036	0.0929794	0.251219	0.0512314	0.0201826	0.397051	-0.253612	-0.2988	-0.0501025
ENSG00000111581.10	NUP107	turquoise	M1	0.339865	-0.575126	-0.0628484	-0.806789	-0.312765	-0.396448	-0.078368	0.941942	0.59969	0.0195099	-0.129533	0.77357	0.530716
ENSG00000171132.14	PRKCE	red	M2	0.516561	0.728749	0.652498	0.378177	-0.0287608	-0.311931	-0.282928	-0.377519	-0.239077	-0.711646	-0.019919	-0.0192663	-0.542257
ENSG00000185238.13	PRMT3	turquoise	M1	0.487208	-0.508413	-0.193464	-0.823434	-0.285906	-0.438301	-0.132757	0.94175	0.679327	-0.155195	-0.332219	0.652711	0.4101
ENSG00000250565.7	ATP6V1E2	pink	M4	0.0935804	0.379849	0.76827	0.0550692	-0.428537	-0.281078	-0.388571	-0.21116	-0.337216	-0.263991	0.333968	0.285905	-0.0968115
ENSG00000116898.12	MRPS15	turquoise	M1	0.373418	-0.597906	-0.253742	-0.715481	-0.100672	-0.360751	-0.0316772	0.941691	0.732655	-0.016793	-0.253091	0.630746	0.453236
ENSG00000151665.12	PIGF	purple	M6	-0.306185	-0.740827	0.0155892	-0.637214	-0.267358	0.110089	0.13266	0.701662	0.332212	0.426809	0.484008	0.84572	0.912967
ENSG00000119878.5	CRIPT	purple	M6	-0.370544	-0.695553	0.0402134	-0.512907	-0.182972	0.187244	0.243166	0.609004	0.362531	0.412483	0.555977	0.808827	0.891662
ENSG00000171150.9	SOCS5	black	M3	-0.0507808	-0.63019	-0.0329818	-0.56857	-0.24833	0.0408133	0.121092	0.728591	0.512644	0.0369652	0.316802	0.78988	0.730009
ENSG00000064726.9	BTBD1	turquoise	M1	0.0778062	-0.794213	-0.448879	-0.787636	-0.162907	-0.184197	0.0148939	0.941629	0.630713	0.346977	-0.177592	0.546217	0.625308
ENSG00000068724.17	TTC7A	red	M2	0.548733	0.952566	0.355482	0.508788	0.0998074	-0.332053	-0.242015	-0.671599	-0.360297	-0.66923	-0.43619	-0.572733	-0.908709
ENSG00000137876.10	RSL24D1	turquoise	M1	0.110504	-0.76036	-0.322744	-0.799092	-0.23326	-0.186973	0.134991	0.941543	0.619296	0.209334	-0.0971086	0.655443	0.642172
ENSG00000119888.10	EPCAM	magenta	M5	0.841291	0.285833	0.44002	-0.494715	-0.511323	-0.894196	-0.685127	0.363801	0.130117	-0.582544	-0.503746	0.336403	-0.299554
ENSG00000095002.14	MSH2	black	M3	-0.12051	-0.355513	0.459328	-0.435297	-0.28845	-0.205612	-0.210722	0.4346	0.0306947	0.322745	0.430611	0.774362	0.549399
ENSG00000124214.19	STAU1	turquoise	M1	0.225038	-0.686628	-0.286558	-0.83224	-0.288237	-0.368897	-0.162178	0.941451	0.584592	0.213578	-0.231792	0.589888	0.522223
ENSG00000152795.17	HNRNPDL	turquoise	M1	0.408589	-0.546986	-0.101858	-0.833018	-0.31355	-0.417297	-0.0935125	0.941446	0.630001	-0.089305	-0.211904	0.743761	0.486759
ENSG00000198252.12	STYX	turquoise	M1	-0.0162572	-0.817453	-0.281679	-0.871554	-0.318384	-0.176577	-0.00830582	0.941404	0.560038	0.365008	-0.00637996	0.705861	0.752171
ENSG00000162869.16	PPP1R21	black	M3	-0.340608	-0.359227	0.461609	-0.146029	-0.0846669	0.22573	0.0585083	0.215393	-0.0282224	0.0663754	0.71426	0.752091	0.593358
ENSG00000100567.13	PSMA3	turquoise	M1	0.295189	-0.644892	-0.314424	-0.776715	-0.197316	-0.298127	0.0864685	0.941403	0.672252	0.0512303	-0.247686	0.61054	0.503375
ENSG00000115239.22	ASB3	black	M3	-0.288183	-0.319632	0.437768	-0.0878721	0.0004308	0.240771	0.208867	0.238409	0.0572928	0.0973494	0.758674	0.757499	0.614211
ENSG00000068912.14	ERLEC1	purple	M6	-0.714922	-0.859242	-0.448857	-0.327848	-0.0227319	0.553015	0.488469	0.430995	0.156277	0.76067	0.493396	0.342077	0.850183
ENSG00000116120.10	FARSB	turquoise	M1	0.450098	-0.530185	-0.158809	-0.847617	-0.331394	-0.462149	-0.210499	0.941392	0.625058	-0.103876	-0.311973	0.667593	0.423034
ENSG00000005175.10	RPAP3	turquoise	M1	0.131641	-0.708604	-0.148459	-0.799948	-0.259328	-0.225738	-0.0155948	0.941352	0.734348	0.0938284	0.0206131	0.805131	0.696589
ENSG00000170634.13	ACYP2	pink	M4	-0.176031	0.312216	0.768619	0.313365	-0.081002	0.158979	-0.00344719	-0.365471	-0.399245	-0.186015	0.673613	0.350857	0.0842509
ENSG00000115306.16	SPTBN1	red	M2	0.393797	0.853696	0.639193	0.389357	-0.229697	-0.442881	-0.560036	-0.612594	-0.543036	-0.500654	-0.170752	-0.356143	-0.759553
ENSG00000115310.18	RTN4	red	M2	0.605121	0.709322	0.191708	-0.0279117	-0.293631	-0.592102	-0.4917	-0.302907	-0.258316	-0.381912	-0.631762	-0.433259	-0.679164
ENSG00000163249.12	CCNYL1	turquoise	M1	0.161295	-0.750999	-0.535711	-0.703885	-0.0515207	-0.100529	0.171465	0.941118	0.817343	0.16033	-0.202658	0.515061	0.595249
ENSG00000139697.14	SBNO1	turquoise	M1	0.136682	-0.715085	-0.04996	-0.779974	-0.269811	-0.227607	-0.0599582	0.941063	0.577272	0.0885846	0.0856798	0.868599	0.694917
ENSG00000115355.16	CCDC88A	purple	M6	-0.461614	-0.784661	-0.669924	-0.0991963	0.493153	0.610676	0.635112	0.489272	0.631506	0.506789	0.309964	0.259241	0.728707
ENSG00000163001.11	CFAP36	black	M3	0.357477	-0.321696	0.0681605	-0.437322	-0.15006	-0.208206	0.0491709	0.68291	0.464884	-0.134724	0.0597008	0.675359	0.409637
ENSG00000275052.5	PPP4R3B	black	M3	0.0326438	-0.711629	0.0229083	-0.807804	-0.347855	-0.194986	-0.0590182	0.894929	0.544214	0.126152	0.185485	0.913376	0.765727
ENSG00000138035.15	PNPT1	turquoise	M1	0.507916	-0.495398	-0.205751	-0.810346	-0.266308	-0.481196	-0.182493	0.940767	0.698229	-0.138653	-0.378314	0.617106	0.368815
ENSG00000197265.9	GTF2E2	turquoise	M1	-0.0109386	-0.824776	-0.205999	-0.732073	-0.174122	-0.0738644	0.0525071	0.940703	0.621837	0.277071	0.135672	0.809154	0.785237
ENSG00000145623.13	OSMR	turquoise	M1	0.278614	-0.675317	-0.453723	-0.796248	-0.200737	-0.28678	-0.051116	0.940688	0.690098	0.128779	-0.344435	0.489575	0.475924
ENSG00000115392.11	FANCL	black	M3	-0.271043	-0.521705	0.304122	-0.401019	-0.166713	0.0715801	0.0773192	0.509299	0.147001	0.406906	0.620048	0.855292	0.777549
ENSG00000119866.21	BCL11A	pink	M4	0.0917942	0.551372	0.907931	0.0716572	-0.3738	-0.357178	-0.439354	-0.412386	-0.572738	-0.194493	0.251495	0.184549	-0.235405
ENSG00000105171.10	POP4	turquoise	M1	0.382371	-0.550034	-0.138281	-0.809975	-0.267549	-0.418923	-0.153152	0.940687	0.668099	-0.0351379	-0.220578	0.70786	0.489578
ENSG00000080371.6	RAB21	turquoise	M1	0.201991	-0.645482	-0.0879636	-0.871618	-0.391738	-0.307408	-0.116446	0.940649	0.630932	0.0614433	-0.0316113	0.812202	0.659541
ENSG00000107669.17	ATE1	turquoise	M1	0.360076	-0.582027	-0.0854762	-0.785578	-0.274834	-0.351177	-0.0656558	0.940629	0.608428	-0.0732646	-0.120147	0.774027	0.527743
ENSG00000162929.13	KIAA1841	black	M3	-0.472048	-0.226297	0.517108	0.0239146	-0.00693418	0.258383	0.0749304	0.00888623	-0.187207	0.290976	0.785617	0.5984	0.526454
ENSG00000115464.14	USP34	black	M3	-0.206776	-0.808835	-0.0389229	-0.682062	-0.260084	0.0895057	0.0706025	0.810277	0.461841	0.261449	0.404944	0.897913	0.89949
ENSG00000081307.12	UBA5	turquoise	M1	0.0444896	-0.786655	-0.250122	-0.835887	-0.293904	-0.123954	0.147529	0.940574	0.574884	0.231746	0.0216842	0.759383	0.746542
ENSG00000172115.8	CYCS	turquoise	M1	0.314892	-0.635003	-0.338863	-0.829494	-0.261795	-0.337252	-0.0293563	0.940493	0.668033	0.00929649	-0.323116	0.57732	0.470911
ENSG00000173163.10	COMMD1	black	M3	-0.193037	-0.663897	0.200287	-0.60669	-0.368634	-0.0945562	-0.115657	0.692414	0.313058	0.261469	0.445347	0.868126	0.755068
ENSG00000170340.11	B3GNT2	greenyellow	M7	-0.532655	-0.784699	-0.610565	-0.0505119	0.492679	0.644158	0.619889	0.415152	0.365766	0.612958	0.370583	0.223095	0.702836
ENSG00000115504.14	EHBP1	black	M3	0.0751731	-0.199071	0.588975	-0.344746	-0.394885	-0.314	-0.453978	0.38809	-0.0465258	-0.0124519	0.39486	0.737478	0.355129
ENSG00000115507.10	OTX1	pink	M4	0.293409	0.7096	0.923804	0.0840796	-0.474617	-0.510192	-0.583533	-0.447194	-0.604787	-0.398146	0.0695947	0.0741314	-0.437952
ENSG00000143951.16	WDPCP	black	M3	-0.347157	-0.133222	0.596246	0.0592423	-0.056273	0.267095	0.106706	0.0241249	-0.153896	0.115209	0.852516	0.669602	0.523793
ENSG00000014641.18	MDH1	black	M3	-0.0156345	-0.235044	0.432921	-0.235688	-0.247616	-0.264482	-0.205244	0.324969	-0.0842695	0.211413	0.319344	0.549166	0.281104
ENSG00000188725.8	SMIM15	turquoise	M1	-0.0157373	-0.849181	-0.455266	-0.816949	-0.206518	-0.103211	0.0868115	0.940304	0.634047	0.355604	-0.0939783	0.588569	0.71207
ENSG00000143952.20	VPS54	black	M3	0.242618	-0.501855	0.0465408	-0.799864	-0.376779	-0.288677	-0.0391754	0.834224	0.518168	0.00107559	0.0318709	0.837476	0.6244
ENSG00000113369.9	ARRDC3	turquoise	M1	0.214066	-0.649069	-0.0824597	-0.815053	-0.307128	-0.322393	-0.144864	0.94028	0.656813	0.066963	-0.0331455	0.80473	0.629732
ENSG00000119862.13	LGALSL	pink	M4	-0.32962	-0.0875312	0.590794	-0.376835	-0.727017	-0.0867844	-0.292337	-0.0162931	-0.507474	0.187984	0.493378	0.454623	0.353178
ENSG00000119844.15	AFTPH	black	M3	-0.00793893	-0.36853	0.529718	-0.566291	-0.412442	-0.25101	-0.153667	0.544106	0.198375	0.0363951	0.447448	0.945344	0.609997
ENSG00000108946.14	PRKAR1A	turquoise	M1	0.0888992	-0.765394	-0.347041	-0.768345	-0.198534	-0.22711	-0.0696289	0.940139	0.69768	0.25329	-0.115776	0.607777	0.62115
ENSG00000115902.11	SLC1A4	pink	M4	-0.125732	0.428781	0.579338	0.200405	-0.2173	-0.170823	-0.0813194	-0.492155	-0.551247	-0.0281704	0.200603	-0.100773	-0.269722
ENSG00000011523.14	CEP68	pink	M4	0.426271	0.831958	0.848652	0.328627	-0.199589	-0.463366	-0.500918	-0.517224	-0.449868	-0.578245	-0.00129816	-0.0573518	-0.603703
ENSG00000198301.12	SDAD1	turquoise	M1	0.441669	-0.529602	-0.116846	-0.797922	-0.294635	-0.441718	-0.188132	0.939863	0.669675	-0.148302	-0.253762	0.708002	0.432328
ENSG00000164164.16	OTUD4	turquoise	M1	0.451283	-0.527581	-0.124248	-0.786092	-0.265152	-0.428102	-0.139832	0.939859	0.660797	-0.125247	-0.250883	0.705142	0.432366
ENSG00000184007.21	PTP4A2	turquoise	M1	0.0847234	-0.792491	-0.502605	-0.70932	-0.0739572	-0.114244	0.137815	0.939777	0.744942	0.313265	-0.146859	0.52646	0.630258
ENSG00000143995.20	MEIS1	pink	M4	-0.252648	0.204993	0.827128	0.138291	-0.266534	0.000781359	-0.325764	-0.293173	-0.548528	0.00267004	0.629111	0.394302	0.114639
ENSG00000143971.8	ETAA1	purple	M6	-0.621081	-0.729315	-0.0586664	-0.34228	-0.10699	0.439022	0.312327	0.437931	0.155254	0.640731	0.698395	0.644152	0.925144
ENSG00000110768.12	GTF2H1	turquoise	M1	0.123944	-0.7208	-0.0986685	-0.848797	-0.35254	-0.239111	-0.110809	0.939745	0.5089	0.153198	0.0269504	0.823203	0.698197
ENSG00000243667.7	WDR92	black	M3	0.386983	0.103506	0.675338	-0.262008	-0.302712	-0.432042	-0.370606	0.291347	0.0676081	-0.328387	0.212416	0.685047	0.144242
ENSG00000152700.14	SAR1B	turquoise	M1	0.32709	-0.584386	-0.0730346	-0.817781	-0.337144	-0.331102	-0.0897169	0.939697	0.630042	-0.0972626	-0.0843375	0.804507	0.572606
ENSG00000164338.10	UTP15	turquoise	M1	0.463047	-0.517081	-0.174705	-0.805873	-0.275289	-0.444182	-0.168804	0.939619	0.668763	-0.116611	-0.311775	0.659263	0.412487
ENSG00000155438.12	NIFK	turquoise	M1	0.432396	-0.564082	-0.297091	-0.805001	-0.250597	-0.40158	-0.130817	0.939528	0.669595	-0.0871285	-0.381033	0.572167	0.391847
ENSG00000115956.10	PLEK	tan	M8	0.0127028	-0.621433	-0.652159	-0.26706	0.4089	0.219115	0.387843	0.654615	0.930031	0.0882777	-0.0984141	0.273621	0.483397
ENSG00000169621.10	APLF	black	M3	-0.200062	-0.195977	0.651625	-0.333076	-0.388092	-0.0483276	-0.171668	0.211295	-0.151876	0.0697113	0.614976	0.791756	0.530941
ENSG00000163219.11	ARHGAP25	tan	M8	0.135045	-0.344696	-0.479371	-0.050418	0.505718	0.162662	0.459946	0.423037	0.890875	-0.15917	-0.126409	0.164626	0.239101
ENSG00000169604.19	ANTXR1	salmon	M9	-0.71326	-0.227857	-0.140326	0.418416	0.275437	0.858607	0.429103	-0.306246	-0.144237	0.136576	0.682527	-0.0418459	0.359295
ENSG00000118217.6	ATF6	turquoise	M1	0.237735	-0.631633	-0.0359511	-0.803821	-0.312979	-0.322155	-0.133087	0.939428	0.649564	-0.00185621	-0.00828902	0.836953	0.622155
ENSG00000169599.12	NFU1	purple	M6	-0.622723	-0.687915	-0.199563	-0.176909	-0.012431	0.48545	0.277647	0.351463	0.115259	0.666926	0.62648	0.42645	0.78698
ENSG00000115977.19	AAK1	purple	M6	-0.598567	-0.818991	-0.349817	-0.223099	0.192688	0.612529	0.615072	0.488947	0.40114	0.591659	0.606591	0.535051	0.91952
ENSG00000196975.16	ANXA4	pink	M4	-0.0589482	0.203584	0.848139	-0.0924596	-0.485289	-0.381679	-0.571846	-0.128541	-0.481005	0.0664562	0.405278	0.386103	0.0259038
ENSG00000087338.5	GMCL1	black	M3	-0.0726557	-0.23291	0.293805	-0.549679	-0.474378	-0.183796	-0.209371	0.342831	0.10833	0.129624	0.242495	0.574601	0.467848
ENSG00000158435.8	CNOT11	turquoise	M1	0.347925	-0.589229	-0.252564	-0.872282	-0.31077	-0.390669	-0.0450984	0.939396	0.602078	0.0522275	-0.287216	0.630763	0.498191
ENSG00000059728.11	MXD1	tan	M8	0.147417	-0.61233	-0.455936	-0.62501	-0.0631838	-0.0521576	0.155925	0.797761	0.893577	-0.0669613	-0.164955	0.483451	0.537591
ENSG00000244617.2	ASPRV1	red	M2	0.16181	0.793826	0.715007	0.236333	-0.414633	-0.397557	-0.489122	-0.681366	-0.744698	-0.278343	-0.0649787	-0.30242	-0.61475
ENSG00000130741.11	EIF2S3	turquoise	M1	-0.000606673	-0.801659	-0.243327	-0.825167	-0.277502	-0.147036	0.0367332	0.93932	0.625702	0.247107	0.0386726	0.751602	0.753059
ENSG00000115998.7	C2orf42	black	M3	0.0619211	-0.351733	0.427354	-0.345133	-0.16737	-0.125322	-0.164815	0.528042	0.291007	-0.134705	0.424895	0.874905	0.515963
ENSG00000116001.16	TIA1	purple	M6	-0.499074	-0.768352	-0.000169841	-0.386983	-0.0535056	0.395184	0.252411	0.554037	0.283257	0.4156	0.69341	0.803498	0.946915
ENSG00000116005.12	PCYOX1	pink	M4	-0.418193	-0.059459	0.647005	-0.0187433	-0.346337	-0.00144794	-0.265486	-0.116797	-0.51235	0.345204	0.685145	0.400743	0.301425
ENSG00000173473.11	SMARCC1	turquoise	M1	0.257763	-0.62761	-0.0218688	-0.819039	-0.32548	-0.393646	-0.190775	0.939291	0.54505	0.122125	-0.0601557	0.804367	0.580631
ENSG00000093000.19	NUP50	turquoise	M1	0.0212032	-0.835547	-0.475078	-0.778711	-0.136601	-0.0816097	0.118594	0.93927	0.674465	0.298615	-0.10939	0.573673	0.684911
ENSG00000166889.14	PATL1	turquoise	M1	0.11398	-0.747309	-0.275535	-0.749663	-0.165742	-0.175709	-0.00231962	0.939255	0.696658	0.187104	-0.0316261	0.699835	0.669663
ENSG00000116031.9	CD207	pink	M4	0.510382	0.195712	0.571325	-0.38533	-0.494085	-0.727346	-0.628759	0.208192	-0.0838195	-0.405115	-0.216115	0.347318	-0.215321
ENSG00000242247.11	ARFGAP3	turquoise	M1	0.0390727	-0.817888	-0.451166	-0.66995	-0.0494517	-0.0169904	0.228181	0.939113	0.740646	0.276034	-0.02588	0.61708	0.702121
ENSG00000124357.13	NAGK	brown	M11	-0.232614	0.00685164	0.0294516	0.476128	0.649546	0.453035	0.488893	-0.203263	0.216983	-0.110259	0.374763	0.0568733	0.0992044
ENSG00000124370.11	MCEE	green	M13	-0.636121	-0.307274	0.352924	-0.0689665	-0.197182	0.439792	0.265933	-0.015754	-0.276378	0.383041	0.845818	0.518525	0.65085
ENSG00000162613.16	FUBP1	turquoise	M1	0.337857	-0.57795	-0.0701516	-0.797456	-0.291305	-0.32823	-0.12939	0.939105	0.626915	-0.0710429	-0.0889379	0.805536	0.567662
ENSG00000124374.9	PAIP2B	pink	M4	-0.00169282	0.497971	0.947312	0.144247	-0.407865	-0.292458	-0.435087	-0.435918	-0.645003	-0.199618	0.382834	0.192851	-0.219271
ENSG00000075292.19	ZNF638	black	M3	-0.291818	-0.564352	0.31008	-0.408269	-0.224028	0.151679	0.0469477	0.526289	0.220457	0.194127	0.675923	0.921405	0.815636
ENSG00000135636.14	DYSF	tan	M8	0.306921	-0.511896	-0.526656	-0.353968	0.2878	-0.0378127	0.204715	0.757145	0.866161	-0.0393588	-0.245432	0.341684	0.362732
ENSG00000003137.8	CYP26B1	magenta	M5	0.85141	0.742883	0.347709	-0.0354463	-0.348521	-0.703635	-0.582424	-0.174045	-0.140881	-0.735508	-0.635047	-0.235169	-0.728655
ENSG00000144036.15	EXOC6B	pink	M4	-0.0541758	-0.0457545	0.818179	-0.366267	-0.558065	-0.314794	-0.460694	0.167218	-0.280019	0.0417216	0.499205	0.738033	0.347499
ENSG00000116096.6	SPR	magenta	M5	0.86429	0.576609	0.00948212	-0.00988263	-0.0561019	-0.625642	-0.4318	-0.0463929	0.0753638	-0.651188	-0.804088	-0.356394	-0.723473
ENSG00000144040.12	SFXN5	red	M2	0.342813	0.710879	0.365438	0.448221	0.223308	-0.113546	-0.0975945	-0.53747	-0.303893	-0.449537	-0.147649	-0.287354	-0.552686
ENSG00000135631.16	RAB11FIP5	red	M2	0.617571	0.83283	0.237018	0.286134	-0.160623	-0.44488	-0.450361	-0.503328	-0.36638	-0.61762	-0.565364	-0.579272	-0.877982
ENSG00000135632.12	SMYD5	magenta	M5	0.918878	0.131516	0.0647138	-0.480663	-0.258543	-0.74793	-0.430522	0.535612	0.419195	-0.584938	-0.66177	0.26646	-0.246352
ENSG00000135617.4	PRADC1	red	M2	0.420487	0.769862	0.390534	0.491608	0.0714188	-0.353598	-0.265765	-0.554296	-0.447939	-0.355181	-0.277601	-0.461377	-0.773775
ENSG00000120438.12	TCP1	turquoise	M1	0.487993	-0.519947	-0.255139	-0.77222	-0.214649	-0.425009	-0.0795932	0.938906	0.680137	-0.109742	-0.368025	0.592975	0.373033
ENSG00000163013.11	FBXO41	red	M2	0.194754	0.390433	-0.213869	0.676563	0.812317	0.289564	0.426568	-0.386935	0.130775	-0.316744	-0.145078	-0.450034	-0.409963
ENSG00000116127.18	ALMS1	black	M3	-0.244904	-0.530218	0.278556	-0.344633	-0.217922	0.185147	0.0562717	0.503858	0.24729	0.0969547	0.659301	0.867597	0.757425
ENSG00000125686.12	MED1	turquoise	M1	0.282066	-0.619781	-0.0808526	-0.776688	-0.281468	-0.348094	-0.195684	0.93879	0.635868	0.0150863	-0.0734504	0.776472	0.564098
ENSG00000144048.10	DUSP11	purple	M6	-0.239727	-0.773615	-0.00681799	-0.748954	-0.367303	-0.0269961	0.0169054	0.762437	0.255961	0.476719	0.329791	0.815852	0.847644
ENSG00000124356.16	STAMBP	black	M3	-0.0649798	-0.356675	0.572936	-0.526023	-0.44921	-0.20911	-0.264939	0.466298	-0.0361894	0.10186	0.482787	0.905001	0.581442
ENSG00000163017.13	ACTG2	red	M2	0.0396114	0.295018	0.527087	0.195414	-0.239869	-0.176611	-0.452347	-0.19858	-0.351264	-0.0568438	0.27282	0.107912	-0.123481
ENSG00000064703.12	DDX20	turquoise	M1	0.375564	-0.594502	-0.289421	-0.755836	-0.153642	-0.298661	0.0463079	0.938622	0.716772	-0.0235139	-0.261041	0.633562	0.482712
ENSG00000187605.15	TET3	red	M2	0.741842	0.641321	0.676502	-0.205914	-0.416787	-0.781994	-0.605534	-0.070561	-0.13429	-0.629457	-0.371425	0.154052	-0.477214
ENSG00000115364.14	MRPL19	turquoise	M1	0.104172	-0.714299	-0.0738289	-0.82655	-0.34319	-0.212643	-0.0478448	0.938552	0.576892	0.128325	0.095946	0.858622	0.734982
ENSG00000197961.11	ZNF121	turquoise	M1	0.352685	-0.591893	-0.114522	-0.833088	-0.33478	-0.362182	-0.106401	0.938543	0.585085	-0.0741722	-0.177175	0.752646	0.514718
ENSG00000122376.11	SHLD2	turquoise	M1	0.21954	-0.643504	-0.166661	-0.881311	-0.37481	-0.346653	-0.119064	0.938534	0.561929	0.186142	-0.124045	0.712978	0.612652
ENSG00000204843.12	DCTN1	red	M2	0.463157	0.968243	0.4326	0.495601	-0.0405547	-0.394066	-0.363218	-0.728539	-0.488037	-0.520747	-0.385074	-0.613864	-0.92061
ENSG00000005448.16	WDR54	salmon	M9	-0.564756	0.0791175	-0.0125794	0.627004	0.485392	0.584176	0.542549	-0.533405	-0.353084	0.462689	0.471309	-0.316435	0.00947522
ENSG00000114993.16	RTKN	red	M2	0.582441	0.762492	0.635449	-0.0235318	-0.476925	-0.724589	-0.662997	-0.363259	-0.529789	-0.465992	-0.430755	-0.190833	-0.699477
ENSG00000239779.7	WBP1	pink	M4	0.057792	0.630954	0.926443	0.318574	-0.236926	-0.234335	-0.418769	-0.548877	-0.586876	-0.30351	0.343148	0.0909538	-0.330476
ENSG00000115275.13	MOGS	red	M2	0.496987	0.655805	0.0301415	0.387044	0.281655	-0.290928	-0.117795	-0.420304	-0.216703	-0.372922	-0.559399	-0.561182	-0.759753
ENSG00000135637.13	CCDC142	red	M2	0.533796	0.865869	0.423017	0.466412	0.0539027	-0.283917	-0.208781	-0.588087	-0.302778	-0.755705	-0.328479	-0.396488	-0.801948
ENSG00000115282.19	TTC31	red	M2	0.178227	0.795009	0.54397	0.723321	0.306567	0.041116	-0.0403031	-0.714586	-0.380568	-0.484318	0.149764	-0.281171	-0.556852
ENSG00000025796.14	SEC63	turquoise	M1	-0.0805056	-0.86957	-0.366595	-0.776396	-0.217306	-0.0191622	0.107627	0.938417	0.646796	0.336411	0.0826646	0.696268	0.807366
ENSG00000164346.10	NSA2	turquoise	M1	0.085072	-0.751071	-0.243482	-0.83938	-0.286383	-0.215963	-0.0134166	0.938408	0.58865	0.23684	-0.033263	0.709924	0.691625
ENSG00000115317.11	HTRA2	red	M2	0.543342	0.630766	0.273452	0.457577	0.328215	-0.321731	-0.0745842	-0.328704	-0.0825719	-0.509242	-0.306531	-0.297044	-0.664885
ENSG00000115318.12	LOXL3	salmon	M9	-0.675181	-0.141489	-0.438178	0.631625	0.639341	0.775135	0.426636	-0.44965	-0.18194	0.426174	0.300733	-0.496201	0.0368411
ENSG00000115325.13	DOK1	brown	M11	-0.181442	0.274365	-0.332966	0.865219	0.859032	0.510687	0.477662	-0.56719	0.000717775	-0.0751098	-0.00535923	-0.663794	-0.40872
ENSG00000135622.13	SEMA4F	red	M2	0.245406	0.819558	0.711852	0.541301	-0.0832578	-0.162224	-0.264691	-0.664874	-0.544373	-0.521197	0.141628	-0.201431	-0.574658
ENSG00000159399.9	HK2	purple	M6	-0.41182	-0.60565	-0.530985	-0.264284	-0.0227444	0.4733	0.400688	0.348657	0.187277	0.472637	0.210775	0.136978	0.586557
ENSG00000118363.12	SPCS2	turquoise	M1	0.0333416	-0.796553	-0.376829	-0.771698	-0.1697	-0.0662681	0.192605	0.93836	0.714139	0.207161	-0.0158111	0.676728	0.733658
ENSG00000115353.11	TACR1	pink	M4	0.353763	0.468721	0.889277	-0.0275131	-0.389455	-0.536234	-0.57739	-0.14211	-0.339556	-0.404107	0.144374	0.342042	-0.24522
ENSG00000115363.14	EVA1A	salmon	M9	-0.355531	0.0210037	-0.444759	0.635167	0.674668	0.818661	0.673743	-0.379336	0.112509	-0.0769099	0.253241	-0.382327	0.0212289
ENSG00000151893.15	CACUL1	turquoise	M1	0.0833831	-0.754682	-0.249653	-0.776531	-0.176699	-0.143067	0.06065	0.938352	0.739778	0.132245	0.016483	0.753041	0.718986
ENSG00000133773.12	CCDC59	turquoise	M1	0.0988082	-0.728875	-0.15707	-0.807007	-0.267091	-0.212067	-0.0414683	0.938335	0.645092	0.169835	0.0316592	0.794928	0.713482
ENSG00000163541.12	SUCLG1	black	M3	-0.0772499	-0.42275	0.503763	-0.577535	-0.513915	-0.293587	-0.322009	0.53919	0.0180003	0.234392	0.440519	0.859363	0.585147
ENSG00000034510.6	TMSB10	greenyellow	M7	-0.390904	-0.313384	-0.685724	0.273882	0.549034	0.468339	0.645168	-0.0351348	0.148396	0.642322	-0.0267223	-0.413127	0.117923
ENSG00000136146.14	MED4	turquoise	M1	0.00726183	-0.794612	-0.182069	-0.861999	-0.347124	-0.176425	-0.0530844	0.93829	0.547353	0.257419	0.0576524	0.784332	0.759117
ENSG00000152284.5	TCF7L1	red	M2	0.250423	0.833177	0.631349	0.541324	-0.113362	-0.25583	-0.446214	-0.697347	-0.548991	-0.477025	-0.00643529	-0.362259	-0.698484
ENSG00000100632.11	ERH	turquoise	M1	0.0357773	-0.794366	-0.358072	-0.834466	-0.267125	-0.198918	-0.0590604	0.938235	0.612301	0.349318	-0.0974384	0.615297	0.678766
ENSG00000042445.14	RETSAT	pink	M4	0.267565	0.692178	0.832312	0.306056	-0.288066	-0.417737	-0.590213	-0.489463	-0.584792	-0.413353	0.0965472	-0.0516472	-0.528571
ENSG00000115459.18	ELMOD3	red	M2	0.0751741	0.630373	0.697327	0.591143	0.0349088	0.00689955	-0.230239	-0.592488	-0.476438	-0.44696	0.338933	-0.063193	-0.400716
ENSG00000140682.19	TGFB1I1	blue	M10	-0.363737	0.447916	0.00381271	0.916131	0.516945	0.494958	0.196318	-0.80513	-0.411027	0.0979113	0.269027	-0.65506	-0.395027
ENSG00000115750.17	TAF1B	turquoise	M1	0.139005	-0.698056	-0.235702	-0.80889	-0.245899	-0.267679	-0.0356838	0.938118	0.727076	0.167765	-0.0752142	0.701804	0.649828
ENSG00000115486.12	GGCX	black	M3	0.0207029	-0.222133	0.471251	-0.315807	-0.443663	-0.222091	-0.355227	0.328966	-0.0879604	-0.0446896	0.316197	0.625287	0.296344
ENSG00000136930.13	PSMB7	turquoise	M1	0.228114	-0.668417	-0.133277	-0.826718	-0.296763	-0.398159	-0.133937	0.938054	0.52616	0.194575	-0.137976	0.707063	0.547897
ENSG00000168899.5	VAMP5	red	M2	0.230694	0.544792	-0.115318	0.729686	0.622348	0.102015	0.24744	-0.51016	0.00424301	-0.282614	-0.232401	-0.617721	-0.615834
ENSG00000168894.9	RNF181	magenta	M5	0.295955	0.10251	-0.218641	0.0956581	0.328194	-0.260874	-0.0598613	0.0488422	0.191664	0.117827	-0.404523	-0.293187	-0.293921
ENSG00000168890.14	TMEM150A	magenta	M5	0.744411	0.183696	0.0619438	-0.0398791	0.195403	-0.40714	-0.231006	0.30328	0.377865	-0.616359	-0.397202	0.15744	-0.27525
ENSG00000168883.20	USP39	magenta	M5	0.871342	0.124038	0.18235	-0.592392	-0.346584	-0.826534	-0.471125	0.561933	0.415284	-0.476939	-0.584806	0.377918	-0.147372
ENSG00000168887.11	C2orf68	pink	M4	0.0463765	0.362615	0.933024	0.132203	-0.227326	-0.231274	-0.366838	-0.237906	-0.323432	-0.276201	0.489352	0.439079	-0.0350941
ENSG00000166226.13	CCT2	turquoise	M1	0.490128	-0.523385	-0.288885	-0.786297	-0.217273	-0.448721	-0.143795	0.937935	0.684194	-0.0887908	-0.419296	0.550793	0.348933
ENSG00000168874.13	ATOH8	red	M2	0.549003	0.902829	0.524943	0.322109	-0.239053	-0.513743	-0.566933	-0.554112	-0.423705	-0.618388	-0.36194	-0.406031	-0.819856
ENSG00000115525.18	ST3GAL5	pink	M4	-0.0379937	0.258914	0.604502	0.39291	0.243478	-0.00488019	-0.0594316	-0.253102	-0.136888	-0.146143	0.456573	0.216918	-0.0697252
ENSG00000113460.12	BRIX1	turquoise	M1	0.476103	-0.515156	-0.193453	-0.830117	-0.294293	-0.481705	-0.134936	0.937773	0.666277	-0.112513	-0.369088	0.626863	0.378654
ENSG00000132300.19	PTCD3	black	M3	0.0986667	-0.57632	0.205044	-0.687935	-0.310381	-0.182182	-0.0423724	0.794725	0.436828	0.0151832	0.272001	0.964024	0.699344
ENSG00000110344.9	UBE4A	turquoise	M1	0.0152415	-0.789652	-0.109571	-0.796824	-0.273325	-0.211482	-0.0942963	0.937695	0.541989	0.293336	0.107788	0.814595	0.741391
ENSG00000079332.15	SAR1A	turquoise	M1	-0.00257699	-0.840438	-0.385879	-0.755013	-0.202003	-0.104332	0.0159662	0.937607	0.605264	0.346598	-0.0402268	0.620648	0.689904
ENSG00000115548.17	KDM3A	pink	M4	-0.0328323	0.259511	0.882271	-0.0284876	-0.367844	-0.171591	-0.244637	-0.156671	-0.333807	-0.131353	0.540587	0.523232	0.135854
ENSG00000115561.16	CHMP3	black	M3	-0.168149	-0.75523	-0.00760432	-0.744506	-0.365067	-0.138003	-0.164303	0.803153	0.424494	0.390532	0.277649	0.800784	0.79224
ENSG00000239305.7	RNF103	black	M3	-0.0287951	-0.179151	0.486007	-0.403793	-0.358327	-0.150034	-0.0450776	0.348797	0.197923	-0.0116313	0.464041	0.756257	0.522879
ENSG00000153561.13	RMND5A	pink	M4	0.518099	0.667382	0.792123	-0.149393	-0.540504	-0.726872	-0.690524	-0.234149	-0.352323	-0.484549	-0.204034	0.100893	-0.457169
ENSG00000153563.15	CD8A	yellow	M12	-0.319481	-0.403435	-0.319183	-0.112026	0.133564	0.406555	0.784595	0.229332	0.297162	0.337421	0.274886	0.187946	0.490425
ENSG00000172086.8	KRCC1	purple	M6	-0.275544	-0.742415	-0.052471	-0.743266	-0.381238	-0.0404021	-0.0580733	0.704584	0.304537	0.424316	0.287812	0.728599	0.803664
ENSG00000144115.16	THNSL2	red	M2	0.204525	0.578546	0.146689	0.48733	0.229561	-0.102107	0.0628385	-0.503499	-0.271563	-0.171274	-0.224055	-0.457543	-0.572083
ENSG00000172071.13	EIF2AK3	purple	M6	-0.464439	-0.650621	-0.176673	-0.220258	0.0332311	0.494616	0.546888	0.39847	0.206754	0.282448	0.566464	0.517698	0.746103
ENSG00000153574.9	RPIA	magenta	M5	0.757168	0.0324201	-0.0969347	-0.319575	0.000584696	-0.520416	-0.0600144	0.515647	0.548894	-0.390224	-0.527792	0.215979	-0.138622
ENSG00000172005.11	MAL	grey	M0	-0.248734	0.0637577	-0.165535	0.298425	0.218504	0.464382	0.740934	-0.285195	-0.105112	-0.0267044	0.190811	-0.200913	0.0216742
ENSG00000171793.16	CTPS1	turquoise	M1	0.400332	-0.592156	-0.369612	-0.770458	-0.206372	-0.300079	0.0179997	0.93729	0.676179	-0.032444	-0.342111	0.553214	0.436846
ENSG00000144026.12	ZNF514	red	M2	0.206633	0.727795	0.830389	0.389612	-0.166265	-0.19105	-0.34961	-0.572147	-0.526693	-0.53296	0.215708	0.0126538	-0.436744
ENSG00000275111.5	ZNF2	black	M3	0.218251	-0.222168	0.292858	-0.432987	-0.344685	-0.385398	-0.496532	0.400467	0.0144926	-0.144545	-0.0216959	0.478579	0.138145
ENSG00000044090.8	CUL7	blue	M10	-0.0845058	0.746911	0.229995	0.914577	0.435111	0.247377	0.0613444	-0.924213	-0.551062	-0.202037	0.0809854	-0.696306	-0.666007
ENSG00000155066.16	PROM2	red	M2	0.41957	0.777515	0.425046	0.0769424	-0.378672	-0.407657	-0.382196	-0.503433	-0.48792	-0.481012	-0.3508	-0.345628	-0.622197
ENSG00000115041.13	KCNIP3	red	M2	0.038728	0.691579	0.276464	0.434608	-0.123277	0.106491	0.0120797	-0.721815	-0.552666	-0.381806	0.00419303	-0.475211	-0.500068
ENSG00000115042.10	FAHD2A	pink	M4	0.203525	0.706726	0.898566	0.37757	-0.184524	-0.300269	-0.403422	-0.528113	-0.549248	-0.377053	0.25068	0.0466365	-0.427311
ENSG00000174501.14	ANKRD36C	green	M13	-0.522761	-0.0253221	0.44361	0.352226	0.113484	0.526735	0.391991	-0.265522	-0.259233	0.155971	0.890358	0.352655	0.396897
ENSG00000158050.5	DUSP2	brown	M11	0.197764	0.279427	-0.215809	0.640994	0.876501	0.191046	0.274875	-0.26868	0.225279	-0.26712	-0.187426	-0.381942	-0.398453
ENSG00000082153.18	BZW1	turquoise	M1	0.127298	-0.777223	-0.5382	-0.754953	-0.142186	-0.115956	0.11176	0.937255	0.675624	0.235752	-0.227347	0.492462	0.589206
ENSG00000135956.8	TMEM127	magenta	M5	0.814013	0.296045	-0.0743494	-0.11377	0.1694	-0.574064	-0.253813	0.246784	0.605052	-0.636682	-0.687036	-0.0544594	-0.432062
ENSG00000144021.2	CIAO1	magenta	M5	0.853352	0.464935	0.373129	-0.0634245	-0.0880873	-0.591517	-0.276848	0.133859	0.14889	-0.745028	-0.414157	0.178604	-0.428543
ENSG00000144028.15	SNRNP200	magenta	M5	0.771053	0.517497	0.546553	-0.0137282	-0.178095	-0.674042	-0.45915	0.0401602	0.0334412	-0.643568	-0.309741	0.165481	-0.467175
ENSG00000198885.9	ITPRIPL1	grey	M0	0.206579	0.262558	-0.142295	0.307577	0.254587	0.0758294	0.534004	-0.173195	0.0153301	-0.0626381	-0.142342	-0.294588	-0.263882
ENSG00000196843.16	ARID5A	tan	M8	0.536417	0.0131611	-0.48473	-0.0481632	0.326254	-0.128365	0.306548	0.324324	0.761935	-0.390971	-0.528712	-0.110732	-0.15582
ENSG00000114982.19	KANSL3	pink	M4	0.271896	0.468875	0.734762	0.348327	0.0635331	-0.172656	-0.259447	-0.268451	-0.258097	-0.493091	0.275194	0.24192	-0.258664
ENSG00000114988.11	LMAN2L	red	M2	0.394831	0.425898	0.67884	0.179392	-0.101795	-0.341768	-0.435936	-0.123538	-0.21464	-0.512913	0.117171	0.254332	-0.279173
ENSG00000158158.12	CNNM4	red	M2	0.0724793	0.792634	0.768449	0.535391	-0.0625307	-0.114619	-0.268142	-0.764962	-0.626499	-0.409852	0.212939	-0.217335	-0.539863
ENSG00000168763.16	CNNM3	red	M2	0.422744	0.959042	0.581397	0.478285	-0.0421962	-0.340742	-0.356925	-0.709786	-0.445214	-0.588058	-0.205307	-0.421581	-0.789715
ENSG00000168758.11	SEMA4C	red	M2	0.578833	0.891393	0.384923	0.334376	-0.0895007	-0.433165	-0.298266	-0.569197	-0.475088	-0.55452	-0.459223	-0.494647	-0.847754
ENSG00000144199.11	FAHD2B	pink	M4	0.193255	0.716936	0.88702	0.321398	-0.281448	-0.333087	-0.41774	-0.539543	-0.621992	-0.309699	0.214717	0.00857528	-0.43351
ENSG00000135976.19	ANKRD36	green	M13	-0.597959	-0.187489	0.332638	0.204276	0.0709209	0.575657	0.484564	-0.146653	-0.205328	0.26882	0.889237	0.419968	0.541488
ENSG00000196912.12	ANKRD36B	green	M13	-0.492555	-0.0875142	0.544815	0.108072	-0.110361	0.33224	0.287036	-0.162602	-0.363429	0.202139	0.817107	0.465457	0.426224
ENSG00000116954.8	RRAGC	turquoise	M1	0.0586925	-0.810131	-0.413504	-0.809151	-0.236658	-0.109757	0.0411023	0.937166	0.609962	0.218091	-0.103001	0.608686	0.670884
ENSG00000115073.7	ACTR1B	red	M2	0.347984	0.969411	0.564907	0.600409	0.00452119	-0.284256	-0.366612	-0.794005	-0.571661	-0.501439	-0.173093	-0.519583	-0.845528
ENSG00000115085.13	ZAP70	yellow	M12	-0.340585	-0.0872392	-0.395099	0.398465	0.538583	0.604433	0.925546	-0.218359	0.0685377	0.23415	0.197749	-0.26384	0.10803
ENSG00000075568.17	TMEM131	black	M3	-0.168083	-0.421345	0.336357	-0.568062	-0.391506	-0.0715213	-0.136203	0.490407	0.118088	0.269356	0.459436	0.817477	0.70605
ENSG00000040933.15	INPP4A	yellow	M12	-0.274144	-0.0951484	-0.0848641	0.451579	0.637436	0.638514	0.786294	-0.112167	0.256244	0.00231634	0.512792	0.134353	0.290149
ENSG00000183513.9	COA5	black	M3	-0.166828	-0.176746	0.666592	-0.225846	-0.25588	-0.0132173	-0.118737	0.215497	-0.0677701	0.0274792	0.673516	0.818256	0.526364
ENSG00000115446.11	UNC50	black	M3	0.209078	-0.315488	0.218107	-0.369801	-0.0864751	-0.155627	0.0896318	0.569107	0.270807	-0.0793772	0.183284	0.731416	0.423705
ENSG00000071073.13	MGAT4A	purple	M6	-0.393416	-0.721834	-0.569177	-0.0854559	0.502854	0.582089	0.708031	0.47985	0.62807	0.434968	0.346856	0.320214	0.716244
ENSG00000196872.12	KIAA1211L	red	M2	0.476819	0.859518	0.293764	0.257729	-0.114634	-0.397922	-0.346755	-0.576704	-0.373241	-0.451	-0.472137	-0.539179	-0.767749
ENSG00000144182.17	LIPT1	black	M3	0.06688	-0.294074	0.409684	-0.384879	-0.287742	-0.164078	-0.250242	0.459471	0.236674	-0.219434	0.360412	0.770897	0.438167
ENSG00000158411.11	MITD1	black	M3	-0.14984	-0.763862	-0.0610517	-0.7346	-0.264831	0.00497632	0.158991	0.805345	0.509368	0.270084	0.290036	0.857297	0.848775
ENSG00000185414.20	MRPL30	magenta	M5	0.753429	0.012317	0.250885	-0.587186	-0.391931	-0.768991	-0.453141	0.559702	0.27588	-0.458991	-0.475372	0.444692	-0.111614
ENSG00000198862.14	LTN1	turquoise	M1	-0.017567	-0.804404	-0.108464	-0.811498	-0.296234	-0.13266	0.0072331	0.936995	0.565096	0.250123	0.165607	0.866482	0.805454
ENSG00000145050.17	MANF	turquoise	M1	0.138197	-0.7566	-0.422495	-0.787545	-0.185669	-0.204864	0.00581454	0.93696	0.669494	0.187006	-0.21207	0.56228	0.578792
ENSG00000135945.10	REV1	black	M3	-0.14896	-0.416575	0.463579	-0.485392	-0.371909	-0.0108477	-0.074961	0.479947	0.0526381	0.12607	0.591933	0.925491	0.710364
ENSG00000115526.11	CHST10	grey	M0	-0.0727525	-0.334458	-0.507999	0.23122	0.508152	0.36673	0.385156	0.195089	0.310886	0.176738	-0.0044481	-0.0900662	0.118825
ENSG00000090520.11	DNAJB11	turquoise	M1	0.278693	-0.654785	-0.369861	-0.761195	-0.129588	-0.243235	0.101146	0.936952	0.778589	-0.00866932	-0.249154	0.60494	0.529512
ENSG00000030066.13	NUP160	turquoise	M1	0.287293	-0.620169	-0.0857995	-0.734863	-0.204635	-0.346716	-0.142433	0.936844	0.617447	0.0394433	-0.081428	0.765777	0.543403
ENSG00000071082.11	RPL31	purple	M6	-0.36296	-0.877493	-0.22511	-0.667069	-0.223636	0.118923	0.190507	0.751312	0.298075	0.631603	0.322973	0.682978	0.875355
ENSG00000204634.12	TBC1D8	red	M2	0.465303	0.755944	0.721927	0.32293	0.0501544	-0.442938	-0.428396	-0.427224	-0.29508	-0.526701	-0.0876822	-0.0349745	-0.559359
ENSG00000134758.14	RNF138	turquoise	M1	0.161345	-0.709518	-0.342617	-0.791524	-0.189888	-0.231147	0.0520561	0.936804	0.752318	0.197828	-0.143694	0.625695	0.620382
ENSG00000163162.8	RNF149	tan	M8	0.274487	-0.541862	-0.384026	-0.669836	-0.0835803	-0.182713	0.141625	0.82713	0.90091	-0.100891	-0.238246	0.519769	0.484002
ENSG00000196460.14	RFX8	salmon	M9	-0.520365	-0.579993	-0.558029	0.107757	0.460814	0.813546	0.79526	0.220469	0.360582	0.373023	0.46709	0.146093	0.641926
ENSG00000108424.10	KPNB1	turquoise	M1	0.442959	-0.558775	-0.326694	-0.719343	-0.116418	-0.399648	-0.0844204	0.936791	0.77637	-0.044197	-0.378484	0.540856	0.370146
ENSG00000115590.14	IL1R2	tan	M8	0.322184	-0.5368	-0.419056	-0.620005	-0.0462419	-0.175442	0.0471531	0.831599	0.90521	-0.172301	-0.281517	0.479489	0.426438
ENSG00000115520.8	COQ10B	turquoise	M1	0.0526329	-0.773455	-0.323004	-0.780559	-0.211777	-0.104985	0.105517	0.936675	0.66148	0.251753	0.00884753	0.692826	0.734172
ENSG00000115598.10	IL1RL2	black	M3	0.600634	0.206408	0.664793	-0.547096	-0.633193	-0.764823	-0.659121	0.314186	-0.0681891	-0.434861	-0.191848	0.552611	-0.0811214
ENSG00000131508.16	UBE2D2	turquoise	M1	-0.00786471	-0.819127	-0.35279	-0.812935	-0.259856	-0.0550261	0.162598	0.936674	0.590043	0.294202	0.025722	0.69476	0.775097
ENSG00000164332.8	UBLCP1	turquoise	M1	-0.0390851	-0.853185	-0.412088	-0.807128	-0.201644	-0.0576113	0.185297	0.936609	0.664115	0.307657	-0.0192655	0.652067	0.758042
ENSG00000107937.19	GTPBP4	turquoise	M1	0.468398	-0.533161	-0.289732	-0.786812	-0.226657	-0.419221	-0.0755408	0.936597	0.697069	-0.100543	-0.395343	0.568732	0.371973
ENSG00000135953.11	MFSD9	black	M3	0.481045	-0.06028	0.483137	-0.491314	-0.373363	-0.520623	-0.351513	0.498164	0.119583	-0.373668	-0.00873737	0.700162	0.163114
ENSG00000126777.18	KTN1	turquoise	M1	-0.00692017	-0.81642	-0.310879	-0.822812	-0.286613	-0.118267	0.0506866	0.936493	0.548159	0.348474	0.01675	0.6946	0.755485
ENSG00000135966.13	TGFBRAP1	magenta	M5	0.719935	0.111709	0.239268	-0.279827	-0.127931	-0.449429	-0.307898	0.435751	0.460676	-0.699573	-0.246901	0.456741	-0.0606351
ENSG00000135974.10	C2orf49	black	M3	-0.0326168	-0.519347	0.375117	-0.629447	-0.364256	-0.186366	-0.0986903	0.675412	0.262192	0.133278	0.429491	0.975705	0.714205
ENSG00000186141.9	POLR3C	turquoise	M1	0.411694	-0.541721	-0.072147	-0.753128	-0.218168	-0.392342	-0.0586429	0.936381	0.677299	-0.106055	-0.164543	0.768561	0.4815
ENSG00000071051.14	NCK2	red	M2	0.0338138	0.646518	0.178338	0.787535	0.44049	0.280451	0.397635	-0.696624	-0.289253	-0.268709	0.133143	-0.466802	-0.471756
ENSG00000215301.10	DDX3X	turquoise	M1	0.0944848	-0.730955	-0.244409	-0.827645	-0.28465	-0.22307	-0.00511835	0.936345	0.690996	0.166366	-0.0489915	0.716591	0.681414
ENSG00000135968.20	GCC2	purple	M6	-0.542349	-0.837873	-0.306426	-0.35988	0.0589298	0.487594	0.501012	0.566454	0.463671	0.517223	0.550274	0.602942	0.927453
ENSG00000137814.11	HAUS2	turquoise	M1	0.173399	-0.726902	-0.277585	-0.725699	-0.137324	-0.208631	0.0272285	0.936313	0.565261	0.230752	-0.087378	0.658253	0.599976
ENSG00000119812.19	FAM98A	turquoise	M1	0.0946178	-0.775304	-0.35171	-0.831427	-0.281558	-0.233094	-0.0478727	0.936291	0.531474	0.298901	-0.161614	0.598601	0.611311
ENSG00000163006.12	CCDC138	black	M3	-0.0290476	-0.659881	-0.069243	-0.563733	-0.132527	0.0716019	0.185156	0.769028	0.520026	0.151921	0.29554	0.814535	0.761271
ENSG00000100767.16	PAPLN	blue	M10	-0.0679149	0.630052	0.226364	0.913775	0.613009	0.325145	0.132367	-0.78634	-0.335626	-0.279767	0.170161	-0.495341	-0.521552
ENSG00000186522.15	2020-09-10	black	M3	-0.0755253	-0.479448	0.392454	-0.711218	-0.59683	-0.364078	-0.364634	0.588433	0.00932316	0.315095	0.295335	0.785604	0.568812
ENSG00000198142.5	SOWAHC	red	M2	0.435226	0.538573	0.206449	-0.194149	-0.458568	-0.438904	-0.222766	-0.222001	-0.30233	-0.337649	-0.451021	-0.246795	-0.43225
ENSG00000144063.3	MALL	purple	M6	-0.557705	-0.731339	-0.430693	-0.374544	-0.145985	0.528463	0.354461	0.4047	0.158056	0.507394	0.404413	0.323883	0.781644
ENSG00000147677.11	EIF3H	turquoise	M1	-0.0288683	-0.82506	-0.159555	-0.791227	-0.254497	-0.156532	-0.0077046	0.936265	0.537042	0.32191	0.1233	0.798586	0.769054
ENSG00000169679.15	BUB1	greenyellow	M7	-0.725808	-0.51683	-0.352216	-0.00453021	0.150953	0.453317	0.337281	0.0380727	-0.157534	0.980245	0.366103	-0.0612684	0.477637
ENSG00000089280.18	FUS	turquoise	M1	0.334974	-0.607713	-0.225778	-0.691997	-0.102217	-0.21091	0.117215	0.93614	0.764107	-0.0872898	-0.123931	0.728679	0.553267
ENSG00000134352.20	IL6ST	turquoise	M1	0.15724	-0.6997	-0.256431	-0.796696	-0.275672	-0.296761	-0.151362	0.936102	0.616569	0.228093	-0.112467	0.640959	0.596874
ENSG00000153208.16	MERTK	tan	M8	0.14256	-0.286091	-0.363403	0.10889	0.669874	0.172624	0.232409	0.372566	0.75552	-0.145678	-0.0317024	0.180231	0.199189
ENSG00000180398.12	MCFD2	turquoise	M1	0.0756076	-0.795156	-0.416507	-0.725863	-0.115701	-0.121581	-0.0114721	0.936077	0.621449	0.310034	-0.0951967	0.585166	0.649061
ENSG00000006282.21	SPATA20	blue	M10	-0.252936	0.45262	0.121507	0.913668	0.67671	0.484873	0.326657	-0.742418	-0.299213	-0.150422	0.292049	-0.467178	-0.375382
ENSG00000144161.13	ZC3H8	black	M3	0.194607	-0.435338	0.283204	-0.687445	-0.383076	-0.320635	-0.184954	0.724101	0.379084	-0.0909579	0.170392	0.898766	0.563366
ENSG00000188177.14	ZC3H6	pink	M4	-0.233712	0.129026	0.838006	0.0722893	-0.251205	0.0206494	-0.204869	-0.17373	-0.360769	-0.0578856	0.724813	0.548654	0.250682
ENSG00000169629.11	RGPD8	black	M3	-0.263211	-0.580298	-0.150069	-0.306335	0.0163969	0.342752	0.39421	0.500534	0.534382	0.0602588	0.416344	0.615409	0.718868
ENSG00000203705.11	TATDN3	turquoise	M1	0.17488	-0.689931	-0.167153	-0.734363	-0.1461	-0.206793	0.127271	0.936068	0.702819	0.0914428	0.00787082	0.785667	0.660931
ENSG00000144597.14	EAF1	turquoise	M1	0.229783	-0.683115	-0.332599	-0.805432	-0.277231	-0.207868	-0.0577311	0.936045	0.611259	0.0789517	-0.17681	0.618749	0.576196
ENSG00000125611.15	CHCHD5	magenta	M5	0.591654	0.410844	-0.121114	0.124635	0.189618	-0.346767	0.172829	-0.101792	0.0122148	-0.384093	-0.633365	-0.381849	-0.589599
ENSG00000069329.17	VPS35	turquoise	M1	0.0286533	-0.773604	-0.123473	-0.814065	-0.284689	-0.226875	-0.0244125	0.935842	0.60028	0.26574	0.0790418	0.805458	0.733828
ENSG00000115008.5	IL1A	purple	M6	-0.600263	-0.633335	-0.474821	-0.236413	-0.0564396	0.453906	0.133704	0.250259	0.0550375	0.621599	0.254063	0.0689128	0.564552
ENSG00000155329.12	ZCCHC10	turquoise	M1	0.0858983	-0.788624	-0.385781	-0.766563	-0.191891	-0.0654833	0.159914	0.935779	0.661895	0.122438	-0.0710478	0.661163	0.679482
ENSG00000125571.9	IL37	pink	M4	0.166226	0.446163	0.772306	-0.0420173	-0.508799	-0.554812	-0.690918	-0.303636	-0.545092	-0.231365	0.0168854	0.0513413	-0.378613
ENSG00000136688.11	IL36G	grey	M0	-0.357163	-0.246848	-0.207712	0.0339592	0.0576181	0.416416	0.471678	-0.0157613	-0.0504879	0.170379	0.233831	0.0152754	0.258787
ENSG00000136695.14	IL36RN	grey	M0	-0.523787	-0.24073	-0.067374	0.0101377	-0.162479	0.45276	0.192314	-0.133363	-0.269476	0.219249	0.363411	0.023796	0.29031
ENSG00000168438.15	CDC40	turquoise	M1	0.0911817	-0.729427	-0.13212	-0.767809	-0.206174	-0.194082	0.0248938	0.935769	0.698251	0.168156	0.0729595	0.823629	0.724539
ENSG00000125637.15	PSD4	red	M2	0.623965	0.717528	0.316009	-0.0112377	-0.248613	-0.506127	-0.237527	-0.301102	-0.187887	-0.560254	-0.493148	-0.25933	-0.600501
ENSG00000125618.17	PAX8	black	M3	-0.139858	-0.0102431	0.324859	0.139728	0.119079	-0.0140955	-0.144076	-0.000345243	0.111328	0.0525575	0.367264	0.265874	0.157471
ENSG00000136682.14	CBWD2	black	M3	0.104038	-0.505086	0.256003	-0.676392	-0.332266	-0.213618	-0.0360777	0.734612	0.398642	-0.0326541	0.263703	0.938497	0.656631
ENSG00000144134.18	RABL2A	pink	M4	0.336156	0.48791	0.873639	0.139366	-0.187286	-0.353507	-0.434203	-0.212752	-0.317293	-0.544165	0.23288	0.342696	-0.247969
ENSG00000115084.14	SLC35F5	black	M3	-0.33804	-0.384663	0.499055	-0.45894	-0.508741	-0.0192759	-0.275334	0.308757	-0.166035	0.250536	0.608371	0.767466	0.636821
ENSG00000089902.10	RCOR1	turquoise	M1	0.170491	-0.698803	-0.24884	-0.866052	-0.30456	-0.231359	0.0540866	0.935613	0.665349	0.0912386	-0.112208	0.720199	0.650985
ENSG00000136527.18	TRA2B	turquoise	M1	0.056941	-0.763278	-0.183319	-0.745669	-0.17508	-0.0710552	0.143548	0.935146	0.637823	0.167235	0.126718	0.836757	0.780896
ENSG00000125633.11	CCDC93	black	M3	-0.0139777	-0.399116	0.28799	-0.230441	0.00515446	0.0191409	-0.0499536	0.476958	0.352537	-0.154725	0.441841	0.766119	0.504871
ENSG00000125629.15	INSIG2	purple	M6	-0.565697	-0.622542	0.229896	-0.396032	-0.326375	0.267336	0.0962293	0.367899	-0.056644	0.477814	0.723802	0.727995	0.819052
ENSG00000163064.6	EN1	red	M2	0.527745	0.924778	0.670592	0.272021	-0.260156	-0.523287	-0.562573	-0.557206	-0.450185	-0.595716	-0.257949	-0.267786	-0.732905
ENSG00000019169.10	MARCO	magenta	M5	0.65303	0.141903	-0.274055	-0.259633	0.0698177	-0.566449	-0.227077	0.292006	0.517578	-0.302736	-0.780166	-0.167453	-0.353636
ENSG00000115107.20	STEAP3	magenta	M5	0.721884	0.0557138	0.0807087	-0.443386	-0.24927	-0.660104	-0.440755	0.459582	0.354083	-0.502922	-0.525117	0.234952	-0.194072
ENSG00000186132.15	C2orf76	black	M3	-0.15781	-0.333777	0.375358	-0.429803	-0.483662	-0.00293285	-0.272116	0.374741	0.01759	0.0801361	0.510707	0.718194	0.585205
ENSG00000155368.16	DBI	black	M3	-0.503298	-0.199642	0.478759	-0.245896	-0.434075	-0.0200569	-0.198941	-0.0145988	-0.453714	0.588563	0.560932	0.38983	0.428097
ENSG00000171227.7	TMEM37	red	M2	0.189697	0.582501	0.289094	0.624429	0.398859	-0.113943	-0.138001	-0.537537	-0.194202	-0.284305	-0.0708657	-0.424864	-0.609782
ENSG00000144120.13	TMEM177	magenta	M5	0.673271	0.170308	0.441655	-0.384568	-0.286441	-0.738752	-0.623568	0.350077	0.224628	-0.492766	-0.354271	0.414457	-0.192834
ENSG00000088179.9	PTPN4	black	M3	-0.266397	-0.389549	0.505624	-0.453579	-0.434202	0.0225715	-0.0673952	0.376471	-0.0271462	0.177449	0.6475	0.871549	0.698369
ENSG00000115109.14	EPB41L5	pink	M4	-0.0335529	-0.153429	0.706514	-0.36506	-0.517734	-0.209369	-0.408401	0.290712	-0.1903	-0.00147804	0.546551	0.804749	0.442448
ENSG00000106392.10	C1GALT1	turquoise	M1	0.0277486	-0.795058	-0.347684	-0.826312	-0.267894	-0.164951	-0.00833948	0.935115	0.592628	0.347919	-0.0618496	0.63923	0.701029
ENSG00000173418.11	NAA20	turquoise	M1	0.0748986	-0.771388	-0.314501	-0.832147	-0.294762	-0.107647	0.105494	0.935093	0.563326	0.2133	-0.0283577	0.696488	0.718093
ENSG00000163083.6	INHBB	red	M2	0.565058	0.935378	0.42855	0.300813	-0.210192	-0.505682	-0.535816	-0.597988	-0.440309	-0.601861	-0.473355	-0.523431	-0.876319
ENSG00000074047.21	GLI2	red	M2	0.200335	0.866539	0.61206	0.573241	-0.0431308	-0.268539	-0.438442	-0.768227	-0.617044	-0.296348	-0.0405841	-0.454688	-0.732005
ENSG00000115112.8	TFCP2L1	red	M2	0.389086	0.91209	0.770018	0.324286	-0.306858	-0.473349	-0.511168	-0.642747	-0.615325	-0.489177	-0.114684	-0.264462	-0.710525
ENSG00000074054.18	CLASP1	pink	M4	-0.144794	0.0672552	0.837923	-0.0421292	-0.327984	-0.0771042	-0.292217	-0.0365642	-0.315225	-0.0233634	0.667281	0.637554	0.289024
ENSG00000121892.15	PDS5A	turquoise	M1	0.0273807	-0.766804	-0.118074	-0.80106	-0.275102	-0.1324	0.0176315	0.935052	0.559326	0.226896	0.143221	0.854968	0.791395
ENSG00000048392.11	RRM2B	turquoise	M1	0.163623	-0.729621	-0.364187	-0.767306	-0.171399	-0.150912	0.0352427	0.934889	0.721367	0.0663065	-0.119342	0.641158	0.627528
ENSG00000136732.16	GYPC	magenta	M5	0.505706	0.118749	-0.0841653	0.121665	0.304757	-0.293453	-0.241949	0.195503	0.337882	-0.32961	-0.344779	-0.0513888	-0.293129
ENSG00000136717.15	BIN1	red	M2	0.469159	0.88666	0.264692	0.583276	0.133116	-0.311952	-0.306769	-0.663057	-0.358707	-0.481692	-0.41022	-0.667065	-0.910518
ENSG00000186684.13	CYP27C1	purple	M6	-0.298569	-0.278877	0.127189	-0.303883	-0.388576	0.160847	0.080079	0.114274	-0.262405	0.215301	0.33384	0.309004	0.389302
ENSG00000163161.13	ERCC3	red	M2	0.474135	0.612825	0.696834	0.301437	0.0182191	-0.255999	-0.20833	-0.286941	-0.284109	-0.623552	0.0877286	0.150861	-0.387915
ENSG00000119616.11	FCF1	turquoise	M1	0.277126	-0.624674	-0.203985	-0.805724	-0.265354	-0.39017	-0.103779	0.934888	0.589735	0.16917	-0.202197	0.641662	0.514392
ENSG00000179295.17	PTPN11	turquoise	M1	0.300355	-0.6195	-0.200222	-0.807337	-0.346547	-0.367374	-0.248602	0.934873	0.645607	-0.0177669	-0.200345	0.65466	0.496556
ENSG00000072163.19	LIMS2	red	M2	0.3334	0.894862	0.513224	0.564583	-0.0659525	-0.266862	-0.425299	-0.719226	-0.5183	-0.51988	-0.155008	-0.485067	-0.790278
ENSG00000136709.12	WDR33	black	M3	0.514875	0.086055	0.563832	-0.47986	-0.387055	-0.53598	-0.362151	0.419368	0.197763	-0.349622	0.0112328	0.711147	0.173226
ENSG00000173349.5	SFT2D3	red	M2	0.649982	0.731218	0.133522	0.0534999	-0.120599	-0.514709	-0.179286	-0.313611	-0.119796	-0.474249	-0.659472	-0.432685	-0.697263
ENSG00000143549.21	TPM3	turquoise	M1	0.190278	-0.725032	-0.527766	-0.725346	-0.0561476	-0.192269	0.0811059	0.934851	0.805543	0.208768	-0.280711	0.475632	0.54085
ENSG00000144233.9	AMMECR1L	black	M3	0.27934	-0.435335	0.127649	-0.558861	-0.240169	-0.208475	-0.11394	0.711107	0.317352	-0.120542	0.0825318	0.745967	0.450347
ENSG00000136715.18	SAP130	black	M3	-0.079219	-0.482974	0.325315	-0.582269	-0.350317	-0.21421	-0.220662	0.605679	0.29086	0.238675	0.392396	0.844493	0.660702
ENSG00000169045.17	HNRNPH1	turquoise	M1	0.374317	-0.569696	-0.256671	-0.745925	-0.173001	-0.283207	0.0341225	0.934673	0.691446	-0.0133051	-0.21592	0.661928	0.51082
ENSG00000136720.7	HS6ST1	magenta	M5	0.647851	0.303873	-0.201959	-0.226643	-0.0664256	-0.522579	0.0365527	0.124839	0.228777	-0.225917	-0.753	-0.274015	-0.427357
ENSG00000136699.19	SMPD4	red	M2	0.715729	0.856577	0.214339	0.250399	-0.044337	-0.54432	-0.33669	-0.429027	-0.264979	-0.513083	-0.669307	-0.541048	-0.873806
ENSG00000152082.14	MZT2B	red	M2	0.183887	0.766317	-0.00909408	0.504532	0.115426	-0.0973721	-0.0321414	-0.750816	-0.473006	-0.149312	-0.433513	-0.857921	-0.790919
ENSG00000136710.10	CCDC115	red	M2	0.257585	0.838338	0.768212	0.479204	-0.0745965	-0.337717	-0.36558	-0.671653	-0.552069	-0.379094	0.0517637	-0.239699	-0.640097
ENSG00000136718.9	IMP4	magenta	M5	0.811429	-0.102073	-0.12389	-0.610187	-0.227577	-0.638724	-0.298768	0.706104	0.559201	-0.429298	-0.632646	0.344424	-0.0419901
ENSG00000110799.13	VWF	blue	M10	0.115717	0.730593	0.107761	0.9127	0.554032	0.198371	0.0905775	-0.775549	-0.299261	-0.351816	-0.0594428	-0.669498	-0.698954
ENSG00000136002.18	ARHGEF4	red	M2	0.30641	0.834755	0.660746	0.193454	-0.375437	-0.389768	-0.464165	-0.62135	-0.633128	-0.418545	-0.137195	-0.274195	-0.609471
ENSG00000144736.14	SHQ1	turquoise	M1	0.441682	-0.534115	-0.151541	-0.761962	-0.227207	-0.412014	-0.0933897	0.934662	0.652923	-0.109638	-0.265367	0.687475	0.423551
ENSG00000124787.13	RPP40	turquoise	M1	0.47626	-0.524254	-0.268094	-0.787055	-0.219842	-0.467546	-0.206659	0.934434	0.685016	-0.0622613	-0.404282	0.556595	0.354365
ENSG00000173272.16	MZT2A	red	M2	0.0904671	0.696594	0.0449705	0.522952	0.162995	0.0170056	0.105543	-0.732671	-0.50162	-0.106687	-0.277314	-0.72382	-0.66133
ENSG00000163468.15	CCT3	turquoise	M1	0.488965	-0.51842	-0.256985	-0.801926	-0.258409	-0.488919	-0.203404	0.934342	0.663083	-0.084961	-0.422602	0.554887	0.336285
ENSG00000176771.17	NCKAP5	pink	M4	-0.0797456	0.370657	0.888735	0.120739	-0.451055	-0.191466	-0.439172	-0.34254	-0.567365	-0.158759	0.487299	0.2804	-0.0779736
ENSG00000152127.9	MGAT5	brown	M11	-0.278737	-0.272764	-0.31054	0.492542	0.832768	0.663288	0.654987	0.0306863	0.377037	0.144682	0.415572	0.0704736	0.300981
ENSG00000082258.13	CCNT2	black	M3	-0.107732	-0.712434	0.0130467	-0.705502	-0.277409	0.0115303	0.112039	0.803971	0.518702	0.175631	0.353464	0.914942	0.858869
ENSG00000115839.17	RAB3GAP1	black	M3	0.188096	-0.504211	0.285726	-0.712741	-0.454699	-0.335675	-0.267934	0.780067	0.33348	-0.0511055	0.19482	0.914828	0.57496
ENSG00000048991.16	R3HDM1	purple	M6	-0.381088	-0.893097	-0.301337	-0.60625	-0.154547	0.265937	0.24116	0.74621	0.426906	0.517917	0.374146	0.685811	0.92335
ENSG00000143106.13	PSMA5	turquoise	M1	0.261827	-0.685519	-0.380502	-0.718417	-0.0784489	-0.240305	0.162035	0.934231	0.699571	0.112312	-0.245066	0.575557	0.507641
ENSG00000076003.5	MCM6	greenyellow	M7	-0.291125	-0.700236	-0.369872	-0.448691	0.00149254	0.0171887	0.175142	0.575564	0.300901	0.812792	0.0696674	0.302171	0.572552
ENSG00000080824.18	HSP90AA1	turquoise	M1	0.472212	-0.517385	-0.213798	-0.774076	-0.24843	-0.442849	-0.170683	0.933814	0.67602	-0.120289	-0.34267	0.608744	0.374474
ENSG00000121966.6	CXCR4	tan	M8	0.0540145	-0.537947	-0.542694	-0.305507	0.325423	0.0960131	0.355919	0.612597	0.921117	0.0534918	-0.127427	0.284218	0.432585
ENSG00000150540.14	HNMT	purple	M6	-0.672382	-0.68783	-0.460526	0.0406357	0.382086	0.683998	0.431364	0.259702	0.367487	0.551548	0.53603	0.208657	0.700892
ENSG00000130638.17	ATXN10	turquoise	M1	0.278422	-0.65115	-0.198591	-0.714008	-0.149844	-0.254378	0.0752377	0.933802	0.640372	0.0517439	-0.1125	0.708439	0.54599
ENSG00000065978.19	YBX1	turquoise	M1	0.110045	-0.751212	-0.396223	-0.784612	-0.185191	-0.231371	-0.05213	0.93367	0.676633	0.295419	-0.171152	0.56466	0.608906
ENSG00000075884.14	ARHGAP15	tan	M8	0.0822003	-0.534766	-0.441152	-0.363494	0.197429	0.1179	0.392885	0.651481	0.927675	-0.0683244	-0.0294972	0.424214	0.505943
ENSG00000121964.14	GTDC1	black	M3	-0.309077	-0.744894	-0.12916	-0.41516	-0.0643475	0.347983	0.278362	0.645101	0.491533	0.17024	0.532523	0.760959	0.869244
ENSG00000169554.21	ZEB2	tan	M8	0.0504131	-0.662694	-0.34046	-0.479043	0.107288	0.0297672	0.137206	0.799971	0.855848	0.0738589	0.0651524	0.596836	0.631595
ENSG00000121989.15	ACVR2A	pink	M4	0.0252352	0.136543	0.837505	-0.182405	-0.423439	-0.251898	-0.338894	-0.00704221	-0.250366	-0.267705	0.444087	0.612755	0.157802
ENSG00000115947.13	ORC4	black	M3	0.199728	-0.425348	0.382717	-0.692163	-0.424149	-0.34348	-0.26581	0.72577	0.355631	-0.125539	0.237529	0.96264	0.576379
ENSG00000204406.13	MBD5	purple	M6	-0.49448	-0.365319	0.279832	-0.0373998	-0.00922157	0.459753	0.249112	0.157207	0.124336	0.198091	0.853076	0.651062	0.722696
ENSG00000135999.12	EPC2	black	M3	-0.0833754	-0.660087	0.0826951	-0.646779	-0.271232	-0.00677658	0.0321479	0.77372	0.506253	0.135054	0.393579	0.923948	0.828101
ENSG00000150556.17	LYPD6B	pink	M4	0.116115	0.486979	0.969298	0.0334506	-0.410101	-0.386821	-0.509492	-0.324404	-0.554482	-0.234866	0.304489	0.304911	-0.184196
ENSG00000105821.15	DNAJC2	turquoise	M1	0.423078	-0.541662	-0.264931	-0.741846	-0.172436	-0.317739	0.056562	0.933281	0.675088	-0.0341786	-0.264711	0.632907	0.465164
ENSG00000122696.14	SLC25A51	turquoise	M1	0.19433	-0.702853	-0.322812	-0.71699	-0.137288	-0.131702	0.0586308	0.933237	0.687248	0.112251	-0.0816053	0.672895	0.632434
ENSG00000184898.7	RBM43	green	M13	-0.715492	-0.21384	0.391612	0.235292	0.0636861	0.440776	0.193179	-0.201238	-0.245136	0.408843	0.884975	0.32987	0.464838
ENSG00000105948.13	TTC26	turquoise	M1	0.0807479	-0.747189	-0.222563	-0.792999	-0.281457	-0.192718	-0.121464	0.932978	0.591418	0.273491	0.00776715	0.718268	0.69653
ENSG00000167005.14	NUDT21	turquoise	M1	0.0644739	-0.734218	-0.0812123	-0.846542	-0.371184	-0.308064	-0.151261	0.932737	0.485218	0.335481	0.0386952	0.786	0.694176
ENSG00000080345.17	RIF1	black	M3	0.0731173	-0.682384	0.0590568	-0.797502	-0.351868	-0.217144	-0.08371	0.893649	0.494991	0.152062	0.17666	0.924612	0.745724
ENSG00000162980.17	ARL5A	black	M3	-0.141345	-0.423236	0.321099	-0.67617	-0.540615	-0.261305	-0.297732	0.496022	-0.0301372	0.395541	0.275167	0.709074	0.587537
ENSG00000176105.14	YES1	turquoise	M1	0.00574118	-0.815239	-0.376921	-0.845218	-0.303815	-0.165165	-0.0205145	0.93272	0.53686	0.372823	-0.0826128	0.60711	0.695497
ENSG00000133704.10	IPO8	turquoise	M1	0.165786	-0.667074	0.0117797	-0.789552	-0.343208	-0.29095	-0.144121	0.932694	0.548234	0.0999483	0.0868016	0.87268	0.671836
ENSG00000111615.14	KRR1	turquoise	M1	0.280401	-0.596463	-0.00627711	-0.866134	-0.405755	-0.388184	-0.153455	0.93265	0.568073	-0.00699161	-0.0640433	0.828353	0.587267
ENSG00000177917.10	ARL6IP6	pink	M4	-0.115854	0.177409	0.662887	-0.125267	-0.343362	-0.267507	-0.235354	-0.154299	-0.532978	0.304359	0.304266	0.282273	0.0667222
ENSG00000153234.14	NR4A2	greenyellow	M7	-0.33183	-0.441908	-0.224367	-0.339952	-0.213687	-0.0149774	-0.192827	0.265746	-0.112286	0.6383	0.0345203	0.0550402	0.319808
ENSG00000163319.11	MRPS18C	turquoise	M1	0.277129	-0.593812	-0.0588875	-0.889713	-0.396992	-0.397432	-0.181874	0.932438	0.548032	0.0792681	-0.114574	0.782189	0.589792
ENSG00000136542.9	GALNT5	salmon	M9	-0.762316	-0.360022	-0.359943	0.290089	0.234841	0.904153	0.651939	-0.200838	-0.084873	0.351917	0.602213	-0.0879529	0.462872
ENSG00000115165.10	CYTIP	tan	M8	0.0811848	-0.569642	-0.490645	-0.472349	0.0895135	0.0631221	0.380208	0.70208	0.917484	0.0205171	-0.0874198	0.409566	0.533085
ENSG00000115170.13	ACVR1	salmon	M9	-0.738591	-0.573929	-0.485091	0.335236	0.544125	0.872332	0.598002	0.0244583	0.0849536	0.566754	0.587308	0.000561382	0.546071
ENSG00000144283.21	PKP4	black	M3	0.425119	0.021306	0.688009	-0.515744	-0.549909	-0.611203	-0.599798	0.432116	0.0897898	-0.306828	0.107117	0.765198	0.18906
ENSG00000163331.11	DAPL1	pink	M4	-0.19253	0.248885	0.868622	-8.67838e-05	-0.397192	-0.223394	-0.400143	-0.258956	-0.579437	0.172397	0.518245	0.359301	0.0750023
ENSG00000115183.15	TANC1	pink	M4	0.107143	0.511327	0.911693	0.135492	-0.36698	-0.194216	-0.372073	-0.36459	-0.488763	-0.40574	0.389049	0.307855	-0.147122
ENSG00000196151.10	WDSUB1	black	M3	-0.0095052	-0.239761	0.581132	-0.333192	-0.27127	-0.129068	-0.140762	0.364506	0.0229636	-0.0899266	0.491583	0.84048	0.474433
ENSG00000123636.18	BAZ2B	purple	M6	-0.214593	-0.503058	0.157535	-0.364238	-0.0819963	0.159108	0.183005	0.507567	0.513182	0.0620152	0.545897	0.800753	0.746571
ENSG00000136536.15	MARCH7	black	M3	-0.199965	-0.79338	-0.0652032	-0.708657	-0.263117	0.0658617	0.110536	0.815519	0.512024	0.309123	0.376276	0.878054	0.90845
ENSG00000141543.12	EIF4A3	turquoise	M1	0.453077	-0.550057	-0.29385	-0.759844	-0.165787	-0.377479	-0.0388252	0.932281	0.688857	-0.0875233	-0.3673	0.579339	0.388765
ENSG00000153246.13	PLA2R1	pink	M4	0.0913708	0.483759	0.936246	0.124248	-0.420438	-0.312511	-0.521618	-0.342813	-0.50755	-0.328399	0.373285	0.275388	-0.192174
ENSG00000115221.12	ITGB6	greenyellow	M7	-0.455597	-0.693833	-0.56347	-0.318291	0.0829287	0.390312	0.482477	0.422121	0.229987	0.747622	0.182475	0.145513	0.636519
ENSG00000142867.14	BCL10	turquoise	M1	-0.0415691	-0.857308	-0.42183	-0.703483	-0.0644285	0.03328	0.271107	0.932226	0.744378	0.272954	0.0602177	0.673942	0.782976
ENSG00000124784.9	RIOK1	turquoise	M1	0.473042	-0.52246	-0.25057	-0.789208	-0.252616	-0.415629	-0.117412	0.932182	0.713673	-0.167719	-0.356082	0.604758	0.388773
ENSG00000163655.16	GMPS	turquoise	M1	0.235592	-0.624855	0.00960914	-0.83085	-0.352654	-0.379058	-0.191646	0.932149	0.496393	0.148089	-0.0192288	0.833604	0.611286
ENSG00000175324.10	LSM1	turquoise	M1	0.192934	-0.724033	-0.409791	-0.724922	-0.12389	-0.22133	0.0171276	0.932147	0.665169	0.250942	-0.219602	0.540868	0.541179
ENSG00000078098.14	FAP	greenyellow	M7	-0.818633	-0.660936	-0.577855	-0.00986745	0.183547	0.677546	0.439071	0.0852526	-0.00627785	0.816528	0.385697	-0.0793193	0.578327
ENSG00000139117.14	CPNE8	turquoise	M1	0.143057	-0.700094	-0.234586	-0.702419	-0.10295	-0.114822	0.0822294	0.932135	0.76463	0.0971144	0.0368728	0.766406	0.706743
ENSG00000115271.11	GCA	tan	M8	0.353959	-0.420806	-0.295827	-0.574955	-0.0511075	-0.27468	0.0170357	0.751004	0.912379	-0.201569	-0.282697	0.461814	0.342323
ENSG00000082438.16	COBLL1	green	M13	-0.461812	-0.114417	0.498082	-0.0332489	-0.332999	0.300601	0.0865265	-0.070182	-0.345199	0.216664	0.804417	0.497616	0.5109
ENSG00000115339.13	GALNT3	purple	M6	-0.437058	-0.671548	-0.117956	-0.551659	-0.335591	0.236705	0.0455335	0.48268	0.10484	0.443875	0.386605	0.54821	0.767878
ENSG00000123607.15	TTC21B	black	M3	-0.356721	-0.285878	0.534695	-0.127222	-0.147064	0.23823	0.0873805	0.182552	-0.0405255	0.119396	0.820007	0.782377	0.643144
ENSG00000112249.14	ASCC3	turquoise	M1	-0.0612727	-0.848879	-0.306496	-0.78084	-0.209401	-0.0228961	0.166604	0.932106	0.630951	0.309622	0.0940021	0.74885	0.809845
ENSG00000172292.14	CERS6	black	M3	-0.0974863	-0.438836	0.390707	-0.557268	-0.342777	-0.216097	-0.205638	0.545216	0.0951541	0.385466	0.420874	0.816053	0.636609
ENSG00000073737.16	DHRS9	yellow	M12	-0.430818	-0.468565	-0.470596	0.101501	0.393365	0.673005	0.72094	0.139331	0.366227	0.141041	0.343963	0.0809107	0.466066
ENSG00000163093.12	BBS5	red	M2	0.636183	0.887711	0.361478	0.374776	0.06809	-0.423492	-0.285681	-0.51679	-0.274924	-0.650955	-0.485925	-0.43917	-0.837399
ENSG00000171421.13	MRPL36	turquoise	M1	0.243419	-0.678862	-0.355975	-0.779579	-0.17849	-0.26314	0.065167	0.931917	0.586959	0.186399	-0.238453	0.579288	0.535076
ENSG00000138398.16	PPIG	black	M3	-0.00885969	-0.698934	0.0462537	-0.754372	-0.338392	-0.126787	0.00158291	0.863912	0.532324	0.161912	0.2732	0.932207	0.80567
ENSG00000008018.9	PSMB1	turquoise	M1	0.371745	-0.580619	-0.188542	-0.806017	-0.240705	-0.466519	-0.0955849	0.931626	0.609237	0.0495259	-0.304012	0.626127	0.420554
ENSG00000119048.7	UBE2B	turquoise	M1	0.0797308	-0.737394	-0.224039	-0.809793	-0.25966	-0.154481	0.0386764	0.931623	0.719418	0.124796	0.0217824	0.76519	0.727536
ENSG00000144357.16	UBR3	black	M3	-0.0245706	-0.459456	0.46551	-0.634519	-0.462672	-0.212265	-0.194802	0.617749	0.162103	0.0696379	0.446121	0.978651	0.675021
ENSG00000198876.13	DCAF12	turquoise	M1	0.153565	-0.708645	-0.121303	-0.742892	-0.156135	-0.255254	-0.0433893	0.93145	0.661038	0.134952	0.0118602	0.7847	0.643151
ENSG00000198586.14	TLK1	purple	M6	-0.429143	-0.736074	-0.049951	-0.489723	-0.191463	0.340333	0.322707	0.584366	0.290942	0.407051	0.607156	0.767737	0.93822
ENSG00000123600.19	METTL8	pink	M4	0.201738	-0.10707	0.678246	-0.503485	-0.471313	-0.451574	-0.415624	0.387124	-0.0867442	-0.101432	0.239702	0.797858	0.307611
ENSG00000115827.14	DCAF17	black	M3	0.161095	-0.632611	0.0749188	-0.842572	-0.40069	-0.304448	-0.180058	0.894388	0.481925	0.0514967	0.0887902	0.901376	0.67612
ENSG00000071967.12	CYBRD1	pink	M4	0.0771845	0.214958	0.677616	0.0106424	-0.334135	-0.32745	-0.524747	-0.110555	-0.344838	-0.197141	0.272379	0.263875	-0.110765
ENSG00000077380.15	DYNC1I2	black	M3	-0.0139349	-0.621846	0.13242	-0.680253	-0.446273	-0.26071	-0.317473	0.740119	0.230693	0.227529	0.192869	0.760881	0.596394
ENSG00000115840.14	SLC25A12	black	M3	0.279354	-0.0577602	0.69909	-0.428739	-0.44682	-0.412576	-0.364925	0.401447	0.0720686	-0.267489	0.309089	0.837711	0.310784
ENSG00000025800.14	KPNA6	turquoise	M1	0.290604	-0.599945	0.0199754	-0.828987	-0.401298	-0.408207	-0.267967	0.931384	0.497534	0.0204722	-0.0578526	0.817884	0.553861
ENSG00000172878.14	METAP1D	pink	M4	0.158271	0.371738	0.882699	0.0261243	-0.307624	-0.288104	-0.422507	-0.180055	-0.341935	-0.338669	0.339562	0.434287	-0.0707311
ENSG00000169490.17	TM2D2	turquoise	M1	0.173664	-0.721368	-0.333751	-0.632553	-0.0131986	-0.134284	0.0283799	0.931356	0.752095	0.134592	-0.0720171	0.64541	0.601073
ENSG00000152256.13	PDK1	black	M3	-0.307176	-0.415161	0.272278	-0.38285	-0.284103	0.200084	0.24399	0.327989	-0.0297345	0.266013	0.573343	0.714536	0.692231
ENSG00000091428.18	RAPGEF4	pink	M4	-0.0222237	0.164114	0.897059	-0.170394	-0.464135	-0.264458	-0.377337	-0.0478036	-0.388972	-0.0902321	0.493204	0.604369	0.177191
ENSG00000095209.12	TMEM38B	turquoise	M1	0.492566	-0.497152	-0.176717	-0.730087	-0.184189	-0.42447	-0.131963	0.931324	0.683094	-0.129895	-0.283242	0.64678	0.395453
ENSG00000144354.14	CDCA7	greenyellow	M7	-0.457173	-0.446797	0.177792	-0.391755	-0.288212	0.0369552	-0.0712802	0.263216	-0.13626	0.681792	0.431318	0.469986	0.593738
ENSG00000109180.14	OCIAD1	turquoise	M1	0.171246	-0.66179	-0.015642	-0.818599	-0.351423	-0.329429	-0.170306	0.931286	0.555253	0.156731	0.0415526	0.833937	0.657168
ENSG00000142556.19	ZNF614	turquoise	M1	0.241682	-0.626426	-0.0540081	-0.815334	-0.332386	-0.304423	-0.153144	0.931268	0.62628	-0.0229178	-0.0110641	0.822991	0.62582
ENSG00000138433.16	CIR1	black	M3	-0.270364	-0.625649	0.00279001	-0.43541	-0.114947	0.112665	0.172642	0.5902	0.558281	0.261545	0.452068	0.725381	0.766837
ENSG00000144306.14	SCRN3	purple	M6	-0.204091	-0.710842	0.0100258	-0.695582	-0.344381	-0.0502688	-0.0781007	0.754084	0.334071	0.447574	0.3613	0.802963	0.836698
ENSG00000163328.13	GPR155	black	M3	-0.145786	-0.413496	0.424875	-0.522466	-0.330414	-0.128163	-0.102352	0.456755	0.161767	0.117721	0.437817	0.835087	0.609808
ENSG00000115935.17	WIPF1	tan	M8	-0.216751	-0.601644	-0.558516	-0.16486	0.351196	0.38401	0.525421	0.489409	0.833997	0.170698	0.151587	0.267256	0.569028
ENSG00000128656.14	CHN1	salmon	M9	-0.710266	-0.490308	-0.458643	0.17713	0.284432	0.890677	0.696053	-0.015929	0.0800146	0.40662	0.553297	0.0214822	0.574878
ENSG00000115966.17	ATF2	purple	M6	-0.376998	-0.844858	-0.115375	-0.586848	-0.187544	0.242036	0.189319	0.726153	0.366789	0.445364	0.517723	0.804088	0.95242
ENSG00000135932.11	CAB39	turquoise	M1	0.0810296	-0.787845	-0.488991	-0.774789	-0.143618	-0.0665518	0.200559	0.931233	0.719959	0.199269	-0.131077	0.573847	0.672616
ENSG00000144320.14	LNPK	greenyellow	M7	-0.511404	-0.736774	0.000973224	-0.538463	-0.3423	0.171489	0.0713938	0.521366	0.0339331	0.65082	0.529682	0.647349	0.837535
ENSG00000128709.13	HOXD9	red	M2	0.0449235	0.804274	0.328616	0.848125	0.306077	0.203277	0.0245313	-0.888718	-0.514167	-0.433873	0.0764813	-0.594047	-0.679184
ENSG00000175879.9	HOXD8	salmon	M9	-0.432481	0.0263829	-0.0899067	0.635121	0.490171	0.685345	0.555935	-0.410648	-0.167055	0.069295	0.459562	-0.223673	0.0263714
ENSG00000171298.13	GAA	blue	M10	-0.213778	0.428053	-0.086016	0.911364	0.783871	0.462571	0.338984	-0.732692	-0.223519	-0.0937813	0.0988997	-0.650061	-0.469904
ENSG00000128654.14	MTX2	purple	M6	-0.258846	-0.70718	0.0467325	-0.743687	-0.393469	-0.0609997	0.00485204	0.705142	0.21647	0.504913	0.351531	0.794226	0.833291
ENSG00000165609.13	NUDT5	turquoise	M1	0.177862	-0.684161	-0.0765542	-0.796973	-0.259086	-0.265986	0.0168298	0.931092	0.528057	0.147106	0.00629683	0.820496	0.651536
ENSG00000116044.16	NFE2L2	black	M3	0.0154231	-0.585123	0.232578	-0.799483	-0.488115	-0.254325	-0.148153	0.757253	0.325571	0.0925907	0.234926	0.923274	0.693102
ENSG00000163565.18	IFI16	turquoise	M1	0.102791	-0.766308	-0.498707	-0.732159	-0.0742495	-0.129842	0.127156	0.930978	0.790239	0.25801	-0.170949	0.531436	0.627137
ENSG00000196659.9	TTC30B	black	M3	0.0284091	-0.406187	0.378347	-0.562619	-0.404274	-0.358656	-0.320636	0.555387	0.061118	0.245532	0.225649	0.741302	0.460265
ENSG00000197557.7	TTC30A	black	M3	-0.243711	-0.729601	-0.056735	-0.595972	-0.284878	0.0730624	-0.0430016	0.711382	0.363519	0.345892	0.388415	0.746532	0.809322
ENSG00000155636.15	RBM45	black	M3	0.124332	-0.544475	0.124011	-0.640966	-0.219204	-0.171342	-0.0316323	0.768931	0.497731	-0.0253091	0.198261	0.890635	0.652479
ENSG00000079156.17	OSBPL6	black	M3	0.238141	-0.148924	0.608698	-0.635365	-0.611163	-0.587349	-0.566426	0.445246	-0.0768653	-0.0879787	0.0809977	0.738549	0.254734
ENSG00000180228.13	PRKRA	black	M3	0.0898029	-0.693006	-0.00853465	-0.867718	-0.425794	-0.303108	-0.1714	0.90102	0.45992	0.210146	0.0465433	0.838081	0.687187
ENSG00000079150.18	FKBP7	greenyellow	M7	-0.609111	-0.62807	-0.273554	-0.280943	-0.180381	0.322717	0.100064	0.268115	-0.00955498	0.675337	0.363441	0.194822	0.590333
ENSG00000106355.10	LSM5	turquoise	M1	0.0199007	-0.783944	-0.205072	-0.815024	-0.269699	-0.198809	0.0492831	0.930873	0.503592	0.385867	0.0247277	0.742055	0.724154
ENSG00000187231.14	SESTD1	purple	M6	-0.330967	-0.614951	-0.014695	-0.289527	-0.113688	0.167511	-0.0278119	0.492069	0.193136	0.344987	0.486899	0.561363	0.652417
ENSG00000055147.19	FAM114A2	turquoise	M1	-0.0123921	-0.805036	-0.160799	-0.735552	-0.210693	-0.116213	-0.0265067	0.930522	0.558161	0.265278	0.147095	0.80513	0.763439
ENSG00000170035.16	UBE2E3	purple	M6	-0.532429	-0.884931	-0.238585	-0.521888	-0.136962	0.359346	0.352918	0.634564	0.274036	0.652666	0.527075	0.658433	0.959414
ENSG00000115232.14	ITGA4	yellow	M12	-0.571868	-0.656529	-0.615817	-0.0508349	0.338686	0.666759	0.786486	0.293915	0.437725	0.595179	0.377743	0.12513	0.681997
ENSG00000138434.17	ITPRID2	pink	M4	0.337803	0.453489	0.841429	-0.250417	-0.636504	-0.70842	-0.751448	-0.130322	-0.435903	-0.272331	-0.0385654	0.242773	-0.284338
ENSG00000115252.18	PDE1A	salmon	M9	-0.533184	-0.388963	-0.0890612	0.295072	0.415131	0.714732	0.464711	0.0352234	0.230819	0.145278	0.728443	0.296834	0.544238
ENSG00000131467.10	PSME3	turquoise	M1	0.527291	-0.488206	-0.236097	-0.791503	-0.246932	-0.47828	-0.157536	0.930429	0.700824	-0.167162	-0.414652	0.578284	0.331269
ENSG00000162998.5	FRZB	red	M2	0.309103	0.900543	0.674549	0.435807	-0.215759	-0.335679	-0.383359	-0.701296	-0.550981	-0.512129	-0.0811524	-0.341229	-0.711455
ENSG00000061676.15	NCKAP1	black	M3	-0.146483	-0.711116	0.120769	-0.778658	-0.476895	-0.141828	-0.214201	0.772638	0.230438	0.343056	0.328667	0.872298	0.796158
ENSG00000113194.13	FAF2	turquoise	M1	0.068428	-0.746117	-0.111737	-0.779151	-0.284011	-0.236602	-0.114798	0.930427	0.54069	0.278801	0.066589	0.79212	0.697786
ENSG00000068878.15	PSME4	turquoise	M1	-0.0364122	-0.849778	-0.347244	-0.724177	-0.121678	0.0367957	0.230989	0.930399	0.611489	0.30384	0.104365	0.729671	0.804194
ENSG00000138448.12	ITGAV	greenyellow	M7	-0.723199	-0.688788	-0.500133	-0.192933	0.036477	0.438412	0.217705	0.208376	-0.0286978	0.905808	0.276104	-0.000876119	0.571099
ENSG00000144369.13	FAM171B	greenyellow	M7	-0.649622	-0.502843	0.0980075	-0.222109	-0.195679	0.332717	-0.0156909	0.142388	-0.223264	0.605662	0.622819	0.39902	0.648583
ENSG00000083099.11	LYRM2	turquoise	M1	0.0457687	-0.780257	-0.244431	-0.759217	-0.197525	-0.21366	-0.0564471	0.930379	0.584337	0.316408	-0.0217897	0.689653	0.663801
ENSG00000003436.16	TFPI	purple	M6	-0.268711	-0.608846	-0.2286	-0.176189	0.146369	0.41353	0.251543	0.509401	0.513469	0.202018	0.478771	0.542276	0.719919
ENSG00000168542.14	COL3A1	salmon	M9	-0.688831	-0.138436	-0.407901	0.655314	0.622054	0.800531	0.619018	-0.478726	-0.20791	0.38083	0.343262	-0.489204	0.0233117
ENSG00000204262.14	COL5A2	salmon	M9	-0.789398	-0.389821	-0.550537	0.409417	0.50785	0.804206	0.608593	-0.251726	-0.126474	0.637401	0.35244	-0.360088	0.266424
ENSG00000083937.9	CHMP2B	turquoise	M1	0.00603861	-0.794917	-0.193107	-0.85565	-0.349243	-0.213349	-0.102396	0.930297	0.56567	0.245905	0.0219522	0.751374	0.723479
ENSG00000138449.10	SLC40A1	salmon	M9	-0.592217	-0.181862	-0.311185	0.621476	0.720555	0.867492	0.707306	-0.308404	0.0180881	0.254774	0.532453	-0.196335	0.233196
ENSG00000117751.18	PPP1R8	turquoise	M1	0.297845	-0.600975	-0.117169	-0.801703	-0.315739	-0.404649	-0.254555	0.930293	0.544229	0.109156	-0.152083	0.697775	0.514441
ENSG00000151687.14	ANKAR	black	M3	-0.306431	-0.222282	0.478621	-0.140534	-0.206833	0.241889	0.117153	0.153595	0.0238634	-0.0120848	0.745528	0.71542	0.593886
ENSG00000128694.12	OSGEPL1	black	M3	-0.0306615	-0.439511	0.430806	-0.567898	-0.322612	-0.215452	-0.20737	0.589156	0.156491	0.171713	0.431055	0.916622	0.652865
ENSG00000128699.14	ORMDL1	black	M3	-0.380141	-0.70694	0.137016	-0.565897	-0.247887	0.121577	0.0477518	0.596977	0.179376	0.445701	0.559557	0.837011	0.871063
ENSG00000064933.17	PMS1	black	M3	-0.100223	-0.728008	-0.0169024	-0.656429	-0.184318	0.0120978	0.187437	0.806891	0.483776	0.225867	0.33235	0.885878	0.827764
ENSG00000187699.10	C2orf88	purple	M6	-0.444876	-0.342795	0.202352	-0.30814	-0.479177	0.138503	-0.146526	0.126063	-0.354746	0.438628	0.483208	0.359943	0.482503
ENSG00000198130.16	HIBCH	black	M3	0.1149	-0.503245	0.25809	-0.769902	-0.453723	-0.32272	-0.126284	0.748359	0.29409	0.0504689	0.183467	0.899172	0.622402
ENSG00000196850.6	PPTC7	turquoise	M1	0.384789	-0.526525	-0.0999568	-0.826451	-0.29646	-0.425234	-0.092388	0.930267	0.669273	-0.00504044	-0.179359	0.728897	0.513684
ENSG00000151690.15	MFSD6	pink	M4	0.109575	0.0738055	0.832849	-0.398354	-0.610216	-0.479616	-0.536396	0.125358	-0.346338	-0.136163	0.292442	0.627213	0.147947
ENSG00000189362.12	NEMP2	salmon	M9	-0.718073	-0.459717	-0.0601438	0.0924701	0.123989	0.782602	0.576868	0.0249549	0.0368316	0.364539	0.825578	0.364229	0.721125
ENSG00000138386.17	NAB1	pink	M4	0.21755	0.54792	0.829201	-0.0940318	-0.542674	-0.463922	-0.611751	-0.313691	-0.52107	-0.30043	0.0810768	0.169739	-0.26346
ENSG00000115419.12	GLS	salmon	M9	-0.495801	-0.355886	-0.23909	-0.0279224	0.0158727	0.665676	0.553173	0.0759663	0.0595768	0.292166	0.536788	0.211553	0.603018
ENSG00000123737.12	EXOSC9	turquoise	M1	0.0482404	-0.762805	-0.249406	-0.724241	-0.114961	-0.146161	0.100767	0.930111	0.700743	0.313488	0.0485153	0.736028	0.731659
ENSG00000138378.19	STAT4	salmon	M9	-0.581487	-0.563757	-0.450868	-0.0243894	0.184191	0.741266	0.758716	0.181811	0.246404	0.397847	0.476455	0.180925	0.655651
ENSG00000128641.19	MYO1B	purple	M6	-0.551951	-0.860596	-0.594398	-0.331247	0.0773292	0.601177	0.59179	0.535027	0.385041	0.576633	0.38367	0.355621	0.848528
ENSG00000173559.12	NABP1	tan	M8	0.14011	-0.672894	-0.544028	-0.61876	-0.00711001	0.00241787	0.271693	0.842014	0.875586	0.00916425	-0.179491	0.470852	0.562994
ENSG00000168497.5	CAVIN2	red	M2	0.285269	0.747765	0.544384	0.470677	-0.12518	-0.247782	-0.38244	-0.568797	-0.399216	-0.495048	-0.02737	-0.294143	-0.618066
ENSG00000162695.12	SLC30A7	turquoise	M1	-0.0811848	-0.886347	-0.464734	-0.745237	-0.127259	0.0269838	0.174421	0.930078	0.63436	0.381811	0.0176246	0.625131	0.780287
ENSG00000089195.15	TRMT6	turquoise	M1	0.517102	-0.4892	-0.205203	-0.811719	-0.289114	-0.482599	-0.169872	0.930057	0.664475	-0.154473	-0.392804	0.601786	0.346424
ENSG00000138411.13	HECW2	green	M13	-0.516362	-0.0617097	0.436951	0.179672	-0.0560872	0.457002	0.125351	-0.221007	-0.296795	0.124891	0.793892	0.378984	0.419165
ENSG00000119041.11	GTF3C3	black	M3	0.019163	-0.693212	0.0774191	-0.763597	-0.319148	-0.171699	-0.0468461	0.870404	0.477869	0.170236	0.247305	0.940318	0.780569
ENSG00000197121.15	PGAP1	black	M3	-0.230756	-0.233163	0.636975	-0.398787	-0.434213	-0.140316	-0.198878	0.251659	-0.172975	0.278296	0.585107	0.771085	0.548543
ENSG00000065413.20	ANKRD44	tan	M8	-0.250962	-0.539696	-0.448877	-0.0567116	0.434513	0.468793	0.647749	0.401956	0.774938	0.123919	0.273931	0.316728	0.577909
ENSG00000115524.16	SF3B1	purple	M6	-0.22997	-0.827109	-0.104036	-0.597338	-0.0923145	0.118096	0.254101	0.816152	0.566215	0.353863	0.419572	0.865652	0.908639
ENSG00000119285.11	HEATR1	turquoise	M1	0.509653	-0.481966	-0.127542	-0.790549	-0.274901	-0.474922	-0.189216	0.929952	0.676808	-0.187641	-0.320094	0.673547	0.375943
ENSG00000163002.13	NUP35	turquoise	M1	0.280669	-0.600451	-0.0219443	-0.828033	-0.361175	-0.349844	-0.188605	0.929854	0.536624	-0.0215308	-0.0578477	0.824234	0.582873
ENSG00000136875.12	PRPF4	turquoise	M1	0.478102	-0.517684	-0.235476	-0.777332	-0.234603	-0.474936	-0.185681	0.929851	0.650723	-0.0454504	-0.391329	0.565903	0.34469
ENSG00000265681.7	RPL17	turquoise	M1	0.424873	-0.542048	-0.230545	-0.817644	-0.263073	-0.398524	-0.0384367	0.92962	0.678272	-0.0943216	-0.326397	0.637992	0.432086
ENSG00000162944.10	RFTN2	salmon	M9	-0.761683	-0.0725426	0.0972662	0.55251	0.272206	0.815018	0.408575	-0.488282	-0.367041	0.191487	0.804182	-0.0608065	0.266228
ENSG00000086589.12	RBM22	turquoise	M1	0.225286	-0.637959	-0.122779	-0.694253	-0.139239	-0.232271	-0.048766	0.929481	0.74793	0.0331441	0.0178133	0.794752	0.634973
ENSG00000157657.14	ZNF618	blue	M10	-0.340371	0.45584	0.211041	0.906919	0.554706	0.549299	0.303865	-0.76347	-0.417937	-0.00814321	0.463499	-0.394212	-0.262742
ENSG00000119042.17	SATB2	green	M13	-0.423633	-0.107916	0.0853196	0.26155	0.06459	0.563869	0.173258	-0.16689	-0.0758121	-0.0461074	0.624207	0.157765	0.324411
ENSG00000114744.9	COMMD2	turquoise	M1	0.0124653	-0.776694	-0.10966	-0.840203	-0.35913	-0.169615	-0.042424	0.929453	0.51628	0.236402	0.121043	0.833238	0.771367
ENSG00000162971.11	TYW5	black	M3	0.0504857	-0.561135	0.113662	-0.626834	-0.245491	-0.0565776	0.0998134	0.759957	0.538121	0.0227123	0.317717	0.918159	0.747883
ENSG00000118564.14	FBXL5	turquoise	M1	0.110739	-0.72606	-0.221193	-0.719802	-0.163325	-0.115187	0.0353243	0.929441	0.778495	0.034373	0.0453945	0.776018	0.702768
ENSG00000196141.14	SPATS2L	salmon	M9	-0.797058	-0.588166	-0.28726	0.162527	0.281136	0.858174	0.525984	0.0508986	0.0196048	0.536923	0.747486	0.209204	0.70017
ENSG00000155729.13	KCTD18	red	M2	0.446645	0.77797	0.657333	0.112018	-0.323181	-0.454655	-0.355995	-0.400062	-0.319263	-0.488508	-0.0895831	-0.0627046	-0.462367
ENSG00000081721.11	DUSP12	turquoise	M1	0.311617	-0.614548	-0.263137	-0.722146	-0.152268	-0.251883	0.117564	0.929409	0.744865	-0.00225668	-0.161134	0.669046	0.538226
ENSG00000132912.12	DCTN4	turquoise	M1	-0.0305283	-0.799789	-0.106631	-0.804124	-0.281855	-0.12765	-0.0238298	0.929378	0.541969	0.301405	0.17462	0.858335	0.813399
ENSG00000013441.16	CLK1	black	M3	-0.266623	-0.680745	0.0130935	-0.682098	-0.381181	0.0150678	0.0234936	0.648978	0.272107	0.348852	0.352794	0.752661	0.795851
ENSG00000240344.9	PPIL3	purple	M6	-0.30264	-0.729874	-0.0738701	-0.561503	-0.17127	0.131811	0.199652	0.68262	0.343893	0.532036	0.444641	0.747917	0.874289
ENSG00000196290.15	NIF3L1	black	M3	0.146694	-0.409662	0.4211	-0.640208	-0.484139	-0.308594	-0.270551	0.676814	0.208397	-0.00622742	0.300255	0.941329	0.57587
ENSG00000115942.9	ORC2	black	M3	0.321481	-0.352267	0.34233	-0.705236	-0.391658	-0.404417	-0.217291	0.731907	0.383012	-0.174693	0.106944	0.915764	0.501568
ENSG00000155744.9	FAM126B	black	M3	-0.00484419	-0.632771	0.112538	-0.701457	-0.312134	-0.0746234	0.067691	0.784566	0.502344	0.0271527	0.313193	0.939306	0.773014
ENSG00000174437.17	ATP2A2	turquoise	M1	0.208526	-0.716288	-0.455319	-0.777392	-0.17293	-0.199787	0.0249696	0.928935	0.628754	0.137497	-0.275859	0.519942	0.530154
ENSG00000153107.13	ANAPC1	turquoise	M1	0.421815	-0.527243	-0.0344539	-0.77214	-0.272935	-0.418758	-0.161877	0.928926	0.628371	-0.115415	-0.158353	0.775019	0.472209
ENSG00000003400.14	CASP10	salmon	M9	-0.447787	-0.0554105	0.121857	0.488139	0.428693	0.629902	0.695803	-0.25593	-0.0540033	0.0540339	0.683341	0.132468	0.269762
ENSG00000064012.21	CASP8	tan	M8	-0.0063047	-0.541003	-0.396089	-0.355779	0.128452	0.157045	0.513237	0.60595	0.801655	0.0760439	0.0687039	0.425223	0.550139
ENSG00000115993.13	TRAK2	black	M3	-0.000553018	-0.466258	0.165986	-0.366361	-0.176552	-0.179745	-0.26406	0.554899	0.32755	0.0590479	0.253414	0.617083	0.426249
ENSG00000082146.13	STRADB	greenyellow	M7	-0.522941	-0.669983	-0.0781179	-0.185225	0.151723	0.359974	0.252794	0.420902	0.121675	0.690453	0.625676	0.543789	0.786749
ENSG00000155755.19	TMEM237	pink	M4	-0.12518	0.0347156	0.861533	-0.241246	-0.503636	-0.278628	-0.402056	0.0290593	-0.37006	0.0930503	0.550305	0.637977	0.275943
ENSG00000003393.15	ALS2	black	M3	-0.128774	-0.366842	0.489834	-0.315044	-0.247237	0.00894043	-0.11537	0.400825	0.0702819	-0.0414525	0.601385	0.852499	0.579008
ENSG00000155760.2	FZD7	red	M2	0.336287	0.912744	0.445024	0.435426	-0.189899	-0.360653	-0.522022	-0.749339	-0.605346	-0.437231	-0.314357	-0.613741	-0.858371
ENSG00000121864.10	ZNF639	turquoise	M1	0.294273	-0.612474	-0.290628	-0.821351	-0.286633	-0.294998	-0.052985	0.928825	0.627829	0.110423	-0.20683	0.618129	0.552736
ENSG00000164815.11	ORC5	turquoise	M1	0.251208	-0.651724	-0.124692	-0.811192	-0.315349	-0.276691	-0.0639093	0.928759	0.543171	-0.00683648	-0.0886675	0.772131	0.58238
ENSG00000204217.14	BMPR2	purple	M6	-0.29924	-0.828391	-0.193078	-0.657924	-0.251355	0.0922568	0.032966	0.773328	0.418276	0.543419	0.349773	0.713222	0.884316
ENSG00000138439.12	FAM117B	pink	M4	0.058404	0.280651	0.9206	-0.0935897	-0.401029	-0.385628	-0.409662	-0.107518	-0.389699	-0.0494589	0.411369	0.487969	0.0395653
ENSG00000165650.12	PDZD8	turquoise	M1	0.382677	-0.568488	-0.276965	-0.847094	-0.348816	-0.390503	-0.148596	0.928722	0.657265	-0.0443061	-0.321327	0.585502	0.446294
ENSG00000138380.18	CARF	black	M3	-0.383146	-0.149655	0.62413	-0.085888	-0.234995	0.213308	0.0692415	0.0232117	-0.238108	0.139487	0.817708	0.681897	0.546318
ENSG00000144426.18	NBEAL1	green	M13	-0.597812	-0.348857	0.400832	-0.043723	-0.176456	0.436858	0.0879341	0.0542267	-0.193806	0.293908	0.904073	0.612162	0.674852
ENSG00000119004.15	CYP20A1	black	M3	0.287953	-0.40273	0.183124	-0.558146	-0.299573	-0.280288	-0.131215	0.72383	0.486217	-0.223723	0.133482	0.788347	0.462756
ENSG00000138443.16	ABI2	black	M3	-0.095269	-0.247136	0.524656	-0.168084	-0.156566	0.0249348	-0.113687	0.325097	0.102934	0.0224963	0.639502	0.803147	0.534163
ENSG00000156384.14	SFR1	turquoise	M1	0.0980212	-0.747813	-0.277611	-0.692518	-0.112036	-0.17685	0.0555455	0.928682	0.661495	0.274584	-0.0232715	0.683517	0.655672
ENSG00000178562.18	CD28	yellow	M12	-0.479729	-0.6929	-0.627646	-0.158331	0.278483	0.528687	0.732853	0.375179	0.427564	0.606352	0.231574	0.131308	0.623208
ENSG00000116117.18	PARD3B	red	M2	0.236354	0.861837	0.771287	0.453993	-0.224451	-0.294594	-0.45116	-0.696995	-0.617207	-0.450726	0.0762723	-0.244939	-0.625008
ENSG00000205423.11	CNEP1R1	turquoise	M1	-0.0436215	-0.833615	-0.330545	-0.761679	-0.169317	-0.00257212	0.196869	0.928657	0.682858	0.241211	0.0941209	0.738782	0.80909
ENSG00000159256.13	MORC3	turquoise	M1	-0.0140751	-0.796407	-0.171839	-0.796279	-0.265046	-0.075599	0.0746491	0.928586	0.61843	0.183485	0.149487	0.839473	0.809568
ENSG00000071994.10	PDCD2	turquoise	M1	0.46684	-0.494674	-0.127056	-0.822376	-0.280515	-0.483759	-0.129471	0.928491	0.673751	-0.121536	-0.308962	0.681435	0.409252
ENSG00000118260.15	CREB1	purple	M6	-0.257088	-0.834106	-0.0723546	-0.693821	-0.253299	0.0626335	0.0756781	0.816919	0.486778	0.363448	0.403672	0.864879	0.916549
ENSG00000175606.11	TMEM70	turquoise	M1	0.28619	-0.641849	-0.428933	-0.731169	-0.0864317	-0.243733	0.0598029	0.928405	0.775535	0.111467	-0.280097	0.531439	0.508993
ENSG00000188786.10	MTF1	turquoise	M1	0.318937	-0.625191	-0.253629	-0.800513	-0.275813	-0.296029	-0.120571	0.928286	0.638078	-0.0962655	-0.227987	0.645652	0.494896
ENSG00000178385.15	PLEKHM3	pink	M4	-0.17971	-0.0302737	0.720427	0.0352828	-0.11891	0.0503973	-0.178692	0.00737989	-0.154322	-0.053089	0.697618	0.64403	0.335318
ENSG00000138413.13	IDH1	greenyellow	M7	-0.578927	-0.430636	-0.0982375	0.188056	0.36655	0.43491	0.355166	0.0629553	-0.0236639	0.647716	0.56498	0.156757	0.457017
ENSG00000115020.17	PIKFYVE	black	M3	-0.00638597	-0.641215	0.0484889	-0.504233	-0.0730439	0.0494087	0.167782	0.77212	0.595849	0.0137329	0.384723	0.90892	0.763456
ENSG00000078018.19	MAP2	pink	M4	-0.439868	-0.0872396	0.662968	-0.144261	-0.460688	0.0378661	-0.316955	-0.095601	-0.452923	0.24898	0.671526	0.496836	0.386129
ENSG00000197713.15	RPE	black	M3	-0.0290238	-0.722996	0.0499797	-0.775062	-0.333724	-0.155849	-0.0431012	0.868182	0.44346	0.271189	0.253789	0.918855	0.800353
ENSG00000144445.17	KANSL1L	pink	M4	-0.20686	-0.0339555	0.755992	-0.102003	-0.331457	0.010172	-0.24957	0.0227973	-0.233569	-0.111893	0.696232	0.691538	0.384768
ENSG00000115365.11	LANCL1	black	M3	-0.148974	-0.400801	0.497	-0.614965	-0.550946	-0.304479	-0.381937	0.469379	-0.0845095	0.314898	0.40994	0.791876	0.571191
ENSG00000030419.16	IKZF2	pink	M4	-0.540358	-0.163484	0.558352	0.0189624	-0.137937	0.248014	0.146143	-0.103635	-0.408638	0.398935	0.811724	0.487816	0.475006
ENSG00000144451.19	SPAG16	pink	M4	-0.287494	0.00512048	0.7588	-0.134305	-0.407184	-0.118136	-0.141563	-0.0577987	-0.400961	0.236268	0.634634	0.538974	0.318475
ENSG00000138376.11	BARD1	pink	M4	-0.269901	-0.137131	0.630855	-0.270694	-0.374975	-0.0812658	-0.175424	0.0971662	-0.328405	0.332568	0.563425	0.622301	0.441481
ENSG00000144452.15	ABCA12	black	M3	0.00880938	-0.410224	0.381845	-0.732223	-0.639318	-0.367202	-0.429441	0.546954	0.000287827	0.0534902	0.178764	0.75623	0.477798
ENSG00000198464.14	ZNF480	turquoise	M1	0.117596	-0.725172	-0.225469	-0.762318	-0.221496	-0.125101	0.00474554	0.928254	0.707371	0.0747967	0.028606	0.769378	0.710323
ENSG00000115414.19	FN1	salmon	M9	-0.745672	-0.42763	-0.53986	0.394272	0.560098	0.750812	0.428806	-0.178483	-0.0319936	0.621608	0.337654	-0.301206	0.283302
ENSG00000118242.16	MREG	red	M2	0.53634	0.513929	0.313129	-0.193436	-0.360975	-0.504891	-0.172738	-0.129217	-0.229029	-0.419313	-0.429968	-0.07776	-0.416557
ENSG00000115425.14	PECR	red	M2	-0.00827786	0.394949	0.64625	0.314959	-0.117709	-0.104828	-0.247169	-0.374047	-0.455646	-0.221989	0.362162	0.072034	-0.211171
ENSG00000143324.13	XPR1	turquoise	M1	-0.0547887	-0.857666	-0.413845	-0.725014	-0.142105	0.0721447	0.190186	0.928211	0.669264	0.268906	0.0892205	0.687543	0.810856
ENSG00000138375.12	SMARCAL1	red	M2	-0.211428	0.256714	0.56127	0.525486	0.265384	0.200326	-0.0576697	-0.38711	-0.318393	-0.0342835	0.577252	0.132373	-0.0362083
ENSG00000134531.10	EMP1	turquoise	M1	0.263088	-0.627731	-0.210474	-0.798622	-0.304329	-0.390431	-0.229414	0.928143	0.610574	0.148452	-0.19017	0.622792	0.511048
ENSG00000115457.10	IGFBP2	salmon	M9	-0.499516	-0.0599677	-0.205127	0.307035	0.0414799	0.687571	0.29405	-0.333328	-0.197088	0.0476895	0.382903	-0.207858	0.167464
ENSG00000115461.5	IGFBP5	red	M2	0.291096	0.673908	0.486196	0.291841	-0.244633	-0.446181	-0.652855	-0.481675	-0.438232	-0.282414	-0.187188	-0.355475	-0.641759
ENSG00000079308.19	TNS1	red	M2	0.352822	0.71618	0.55243	0.425547	-0.137376	-0.334414	-0.497236	-0.495857	-0.398347	-0.495899	-0.0793068	-0.26089	-0.635965
ENSG00000180871.8	CXCR2	tan	M8	0.463351	-0.359059	-0.271211	-0.606075	-0.104056	-0.367877	-0.0773935	0.751473	0.88786	-0.326969	-0.390123	0.439705	0.249978
ENSG00000163464.7	CXCR1	tan	M8	0.501313	-0.370592	-0.286982	-0.630846	-0.113177	-0.385032	-0.0898089	0.785971	0.878471	-0.333873	-0.421943	0.448583	0.245629
ENSG00000079387.14	SENP1	turquoise	M1	0.16725	-0.677559	-0.0639464	-0.725392	-0.201528	-0.22209	-0.0946935	0.92812	0.598364	0.124137	0.0744285	0.83978	0.676078
ENSG00000127837.9	AAMP	magenta	M5	0.847415	0.81013	0.262499	0.112162	-0.118773	-0.658357	-0.347553	-0.272286	-0.0965714	-0.713022	-0.706724	-0.379858	-0.833741
ENSG00000127838.14	PNKD	tan	M8	-0.101299	-0.358536	-0.607067	0.2037	0.735832	0.477669	0.571769	0.236418	0.646429	0.0409269	-0.000432339	-0.0275521	0.24206
ENSG00000166266.14	CUL5	turquoise	M1	-0.0113581	-0.794245	-0.171449	-0.819398	-0.29608	-0.103659	0.115901	0.928015	0.567375	0.23946	0.128753	0.822718	0.799811
ENSG00000018280.17	SLC11A1	tan	M8	0.349327	-0.488755	-0.477091	-0.492099	0.141213	-0.142296	0.099393	0.771382	0.901177	-0.179831	-0.332485	0.377157	0.339467
ENSG00000144579.7	CTDSP1	red	M2	0.538687	0.94671	0.435177	0.53558	0.0519958	-0.365089	-0.363192	-0.648216	-0.318954	-0.677978	-0.342758	-0.513459	-0.884414
ENSG00000135913.11	USP37	black	M3	-0.0613055	-0.692641	0.11475	-0.705703	-0.343974	-0.107387	-0.0943834	0.782163	0.294519	0.186489	0.299573	0.890033	0.739753
ENSG00000157500.12	APPL1	turquoise	M1	0.138856	-0.676535	-0.0181012	-0.860872	-0.371443	-0.347492	-0.194271	0.927994	0.53647	0.18388	0.0260336	0.835321	0.674009
ENSG00000115568.15	ZNF142	magenta	M5	0.771701	0.602926	0.568341	0.0635315	-0.122907	-0.561443	-0.432052	-0.0760744	-0.0320456	-0.851979	-0.291766	0.136272	-0.515034
ENSG00000074582.14	BCS1L	magenta	M5	0.687795	0.048901	0.396014	-0.440717	-0.325528	-0.591229	-0.369982	0.511518	0.285595	-0.550241	-0.203363	0.602167	0.00933175
[truncated: 10,072 more rows]
