# Supplementary material for: Integrative small and long RNA omics analysis of human healing and nonhealing wounds discovers cooperating microRNAs as therapeutic targets
Source: eLife. 2022 Aug 12;11:e80322. doi: 10.7554/eLife.80322 (PMC9374442; doi:10.7554/eLife.80322)
Supplement: Figure 9—source data 1. [file elife-80322-fig9-data1.xlsx]

## Sheet: Sheet1
Source data for cooperation of miR-34a, miR-424, and miR-516 in regulating keratinocyte proliferation and inflammatory response. (related to Figure 9)
Figure 9a						Figure 9b
Ctl	miR-34a-5p/Ctl	miR-424-5p/Ctl	miR-34a-5p/424-5p			Ctl	34a-5p/Ctl	424-5p/Ctl	34a-5p/424-5p
0.82	0.51	0.44	0.28			65.3226	39.3258	51.3699	21.875
0.99	0.63	0.62	0.41			68.3333	17.5439	26.4706	27.451
1.19	0.36	0.67	0.16			95.3271	42.623	31.9444	15.9091
						36	41.4634	42.2222	29.2453
						48.1482	25.641		22.8571
						48.8372
Figure 9c
Hour(s)	Ctl/424			Ctl/34a			34a/424
0	7.46103	7.34649	7.86167	7.59521	7.89014	7.32098	6.64142	6.54373	6.99113
8	9.11109	8.81329	9.0637	9.49595	9.06343	8.6793	7.77738	7.76336	8.26684
16	10.3298	9.91977	9.80909	10.2451	10.2583	9.59693	8.19413	8.78261	8.73598
24	11.6817	10.9173	11.222	11.1077	10.5835	10.7611	9.16475	9.7332	9.72209
32	13.297	12.1172	12.6203	12.157	11.7784	11.8697	9.92703	9.96303	9.93148
40	14.9768	13.8212	14.2498	14.022	12.5898	12.9685	10.8758	10.5642	10.7986
48	18.6667	16.0422	16.6516	14.8433	14.4158	14.0818	11.9167	11.6747	11.8783
56	20.432	18.8175	18.4133	17.5549	16.595	16.4211	12.682	13.6506	12.7315
64	24.2773	21.1848	21.0821	18.9638	18.9935	18.1613	13.3631	14.8714	13.7432
72	27.8317	25.2213	24.5059	21.2904	21.1565	20.3968	15.0164	17.4509	15.4901
80	31.0481	28.5877	27.7851	23.8493	23.2862	22.4738	16.6088	19.5139	17.25
88	34.3628	32.6198	31.5416	26.0457	24.4006	24.4688	17.5878	21.1701	18.7622
96	37.8811	37.6081	35.258	29.4325	29.6779	27.2586	19.3712	25.0113	20.5224
Figure 9d
	Ctl									34a/Ctl									424/Ctl								34a/424
Time (h)	1	2	3	4	5	6	7	8	9	1	2	3	4	5	6	7	8	9	1	2	3	4	5	6	7	8	1	2	3	4	5	6	7	8
0	0	0	0	0	0	0	0	0	0	0	0	0	0	0	0	0	0	0	0	0	0	0	0	0	0	0	0	0	0	0	0	0	0	0
2	14.1099	18.1948	23.8885	21.8369	18.3638	18.2361	10.3525	14.2327	14.5433	6.34676	19.306	7.557	16.1065	14.3008	13.7462	11.3023	13.3162	13.0198	13.6079	12.0396	16.2263	19.6066	22.2101	10.141	15.5776	14.8899	13.7304	18.8724	14.0517	6.22918	15.0231	6.74173	10.7554	-0.316195
4	28.3161	35.1497	38.4989	41.6514	37.0407	36.3513	27.7229	31.2885	28.4924	19.8121	44.3277	20.5665	36.4996	29.8304	32.8783	26.3947	30.855	31.1859	30.7938	29.4691	32.9626	35.9246	42.4619	23.0888	34.6352	31.1641	32.0275	34.9732	32.3008	17.1173	31.0671	15.06	25.4711	5.87837
6	41.9799	51.8272	52.3384	58.0393	50.6697	46.9609	38.9926	41.1353	38.1551	29.0681	60.8631	34.5838	52.0309	43.8204	46.8839	40.9655	42.7013	44.9025	38.6382	46.5675	48.3327	52.3006	56.7359	33.2351	48.5874	42.225	41.4434	46.5987	48.6217	31.1792	40.1544	22.9365	36.0958	18.9381
8	48.3883	62.9692	60.6671	68.138	62.2559	54.1428	50.9688	48.6981	47.701	36.0401	69.6889	47.5246	59.7591	52.7897	58.7648	53.811	55.0432	57.1576	47.4834	54.0373	57.1546	61.9288	66.2719	41.4426	58.2496	53.3094	44.7083	53.5623	59.427	40.0557	52.7553	31.32	44.9156	29.6803
10	57.3885	67.1285	66.6771	73.5065	71.5429	60.2954	55.5863	58.0515	56.1346	41.7067	73.7241	55.209	67.168	62.9654	67.4144	61.3	59.9153	71.5228	53.8164	60.8731	65.7509	72.3546	69.4553	49.0226	65.4427	60.6333	49.9822	58.8365	64.7734	49.2869	60.7259	37.4809	54.3506	39.4228
12	58.499	73.312	72.4257	83.4081	76.9572	63.1229	60.8102	62.4963	61.8767	49.49	76.7984	60.917	73.493	67.9322	76.0827	64.8015	65.9985	76.2061	58.9137	65.497	69.076	76.9438	76.4212	55.8362	68.9653	67.6447	51.7752	62.0301	71.8372	51.734	66.4148	44.7817	58.2517	45.7049
14	64.6334	77.6048	73.8358	85.898	84.2015	68.18	65.6665	68.6556	67.3481	52.7017	79.1097	66.0711	80.5232	70.9113	82.4581	73.6664	69.9908	80.8408	64.1988	66.3473	73.4574	83.0876	79.5968	59.2991	77.6725	70.1069	60.8655	66.1571	73.8562	58.8464	72.2885	50.2967	65.7247	54.3486
Figure 9f
	Inhibitor Ctl										34a inhibitor										424 inhibitor
Time (h)	1	2	3	4	5	6	7	8	9	10	1	2	3	4	5	6	7	8	9	10	1	2	3	4	5	6	7	8	9	10
0	0	0	0	0	0	0	0	0	0	0	0	0	0	0	0	0	0	0	0	0	0	0	0	0	0	0	0	0	0	0
2	1.60464	9.86213	14.8358	7.50349	11.3708	11.9958	3.95667	5.50284	6.30724	4.31797	13.7511	15.9993	13.9399	11.8362	10.7697	8.15787	5.45894	13.6762	11.9249	6.27851	10.0194	13.7057	5.10255	18.0309	17.0055	11.0381	10.4139	7.80083	9.03966	8.45882
4	5.03381	25.6917	33.0544	10.1737	16.374	27.8153	10.1379	10.2079	23.2551	15.844	29.141	34.8572	26.5464	23.9886	25.0972	17.2152	14.7127	29.652	35.7259	20.3409	28.8988	27.1578	14.772	39.166	31.7602	24.6592	25.6937	22.7536	27.1853	19.4989
6	15.4467	36.3802	44.8639	21.2895	30.7742	36.9003	16.775	17.586	37.6367	25.9768	39.2294	49.6963	38.7751	38.2516	43.6296	26.651	22.1006	39.9498	51.8116	31.8936	46.0576	43.1817	28.1986	49.1016	46.4584	34.4146	35.8879	37.3595	40.0244	30.2352
8	25.0929	46.1771	52.0294	28.4039	36.3675	46.4297	21.1401	32.5073	50.0499	31.0722	50.0238	61.9372	45.4377	48.4675	55.5725	36.5418	30.8049	49.8438	60.7358	43.0091	62.7024	54.4583	40.299	57.7471	54.2172	40.1444	45.5702	50.2757	46.2651	40.9674
10	42.7025	50.7923	53.9407	31.6024	42.4795	49.0857	27.0945	39.7623	60.8394	41.4152	55.7381	64.4733	54.4124	55.067	67.8987	44.5775	36.038	54.2144	61.2903	51.8574	72.6557	65.4745	52.579	63.0097	57.3224	42.1592	54.5132	60.8129	53.8488	49.1806
12	65.5696	60.7331	56.7733	37.1498	46.5611	53.5021	31.2321	52.7494	69.412	50.7647	61.1686	72.5934	59.5294	59.7984	75.5233	53.3688	40.8097	61.81	68.8713	56.2795	77.1755	73.4004	57.4358	64.7131	64.6551	47.2625	58.5196	69.5252	56.3524	52.5936
14	82.0618	63.6115	56.6751	40.8125	52.2355	60.8937	37.6095	54.3076	73.966	54.4844	64.293	76.2974	65.1019	66.2455	80.9863	59.1706	43.4207	64.0552	71.9689	61.1329	86.3886	73.4509	60.4951	70.1978	69.4699	49.0406	63.783	75.6967	62.4699	59.8391
Figure 9h
Ctl	34a/Ctl	516b/Ctl	34a/516b
0.144014	3.10362	3.74041	9.4178
1.15731	4.94155	2.88343	9.83464
1.69867	5.33547	4.85843	9.15472
