# Supplementary material for: Integrative small and long RNA omics analysis of human healing and nonhealing wounds discovers cooperating microRNAs as therapeutic targets
Source: eLife. 2022 Aug 12;11:e80322. doi: 10.7554/eLife.80322 (PMC9374442; doi:10.7554/eLife.80322)
Supplement: Supplementary file 3. [file elife-80322-supp3.xlsx]

## Sheet: Sheet1
Supplementary file 3. Summary of microRNAs reported to regulate skin wound healing
We searched previous literature with keywords '((wound) OR (wound healing)) AND (((((miRNA*) OR (microRNA*)) AND ((skin) OR (cutaneous)))))' at the PubMed database on 2021-04-14. ANNOVA test was performed for the differential expressin analysis of our small RNA-seq dataset.
miRNA	Expression in our sRNA-seq dataset (TPMs)				P-value (ANNOVA test)	Reported roles in wound healing	Reference (PMID)
	Skin	Wound1	Wound7	VU
hsa-miR-146a-5p	6060.52	3791.94	7180.05	18798.8	0.00268536	Its deficiency delays wound healing in normal and diabetic mice	33554730, 30359833, 22851573
hsa-miR-31-5p	15.1457	29.2209	337.048	646.925	6.33399e-05	Promotes skin wound healing, enhances keratinocyte proliferation and migration	29605672, 25685928, 33564659
hsa-miR-34a-5p	224.956	205.718	299.934	642.767	6.07841e-05	Enhances wound Inflammation and delays wound closure	31376385, 32395491
hsa-miR-34c-5p	83.4898	59.6832	152.039	349.554	1.27228e-07	Enhances wound Inflammation and delays wound closure	31376385
hsa-miR-21-5p	37523.2	81778.1	309106	430281	2.76835e-13	Ameliorates age-associated wound healing defects in mice; enhances keratinocyte migration and proliferation; facilitates fibroblast function and angiogenesis; delays epithelialization in an acute human skin wound model, in vivo overexpression of miR-21 inhibits epithelialization and granulation tissue formation in a rat wound model.	29656516, 32194865, 31926164, 32397166, 31302227, 23159215, 21647251, 28374893, 22773832
hsa-miR-155-5p	121.579	409.866	706.689	909.944	2.1408e-05	Its knockout promotes wound healing in mice and diabetic rats; its inhibition restores FGF7 expression in diabetic skin and decreases wound inflammation; its overexpression promotes healing through enhancing keratinocytes migration.	31845227, 24636235, 28682732, 28247149, 30967591
hsa-miR-199a-5p	9652.71	7282.59	7084.27	10065.7	0.0156996	Represses wound angiogenesis	23060436
hsa-miR-483-3p	10.6999	5.44545	5.4525	15.6117	0.00924651	Inhibits proliferation and migration in wounded epithelial cells	21676945
hsa-miR-129-5p	3.8803	2.3228	6.25972	11.3402	0.601065	Promotes diabetic wound healing	29748291
hsa-miR-19a-3p	47.7396	40.2179	47.0769	31.5931	0.226996	Accelerates wound closure	32949564
hsa-miR-21-3p	45.3375	456.535	1995.43	1513.81	0.000465197	Accelerate cutaneous wound healing via promotion of angiogenesis and fibroblast function	29290800
hsa-miR-106b-5p	210.932	246.144	414.784	268.247	0.00470848	Prevents skin wound healing	33734576
hsa-miR-132-3p	51.6524	120.597	127.443	120.715	0.022656	Promotes fibroblast migration, enhances transition from inflammation to proliferation	28798331, 26121747, 28807666
hsa-miR-93-3p	10.29	17.2176	19.576	16.953	0.441205	Increases keratinocyte proliferation and migration	33473330
hsa-miR-185-5p	1032.41	1794.62	1429.15	1286.92	0.618154	Inhibits the proliferation and migration of HaCaT keratinocytes	33732339
hsa-miR-136-5p	429.185	104.736	209.851	411.335	0.208184	Modulates proliferation arrest in keratinocytes	25654102
hsa-miR-210-3p	983.222	379.704	1376.09	1077.22	0.243284	Inhibits epidermal cell proliferation	27033464
hsa-miR-19b-3p	688.009	442.759	693.914	509.84	0.502256	Accelerates wound closure	32949564, 33364805
hsa-miR-17-3p	22.4195	18.5957	21.8356	20.3225	0.976171	Promotes keratinocyte cells growth and metastasis	29441982
hsa-miR-497-5p	481.507	279.536	239.926	220.415	2.70276e-05	Accelerated wound healing in diabetic mice	31707336
hsa-miR-29b-3p	474.519	335.495	332.836	319.103	0.117548	Promotes skin wound healing and reduces excessive scar formation	28092445, 27477081
hsa-miR-126-3p	28398.3	23775.7	12968.1	14007.9	3.48205e-05	Enhances viability, colony formation, and migration of keratinocytes	28297576, 30571843
hsa-miR-26a-5p	49809.4	59787.3	25890.6	20327.9	1.84924e-06	Inhibits wound healing by decreasing keratinocytes migration and impairing angiogenesis	32955094, 26776318
hsa-miR-335-5p	283.196	237.322	96.1774	34.5469	0.0211003	Promotes diabetic wound healing	29748291
hsa-miR-221-3p	2930.34	3070.84	2879.33	1949.52	0.0121729	Accelerates Skin Wound Healing in Diabetic Mice	32368119
hsa-miR-149-5p	391.4	191.164	189.46	47.6775	0.00583594	Contributes to scarless wound healing by attenuating inflammatory response	28627609
hsa-let-7b-5p	29023.2	16390.7	12886	10961.5	0.00929616	Inhibits keratinocyte migration	27513293
hsa-miR-99a-5p	90676.4	44608.4	17459.6	9648.63	1.28511e-05	Promotes wound healing	23724047
hsa-let-7c-5p	9317.98	5670.36	3267.73	1962.27	1.37566e-06	Inhibits the proliferation and migration of heat-denatured dermal fibroblasts	26923191
hsa-miR-203a-3p	34104	24778.7	47252.9	12524.3	0.00146203	Local treatment of miR-203 inhibitor accelerates wound closure and reducce scar formation in vivo; inhibits epithelial-mesenchymal transition process in diabetic foot ulcers; impaires epidermal stem cells proliferation	30261495, 31707396, 32787903, 23190607
hsa-miR-27b-3p	30606.6	31502.3	25467.8	20421.4	0.0487047	Improves wound healing in diabetic mouse, promotes angiogenesis	24177325, 32845084, 32170506, 24177325, 32589614
hsa-miR-200c-3p	5233.33	5531.62	4833.12	2027.79	0.00840184	Inhibits keratinocyte migration as well as re-epithelialization	33122632, 28607463
hsa-miR-200b-3p	3600.61	3032	2764.48	807.417	0.00114784	Inhibits keratinocyte migration as well as re-epithelialization; downregulation of endothelial miR-200b supports cutaneous wound angiogenesis; miR-200b inhibitor promotes wound healing.	22499991, 31553422, 29178246
hsa-miR-96-5p	379.539	283.981	290.517	120.489	0.00039912	Inhibits keratinocyte proliferation and migration, and promote collagen deposition in keloids-derived fibroblasts	30883918, 30651862
hsa-miR-205-5p	24499.9	15294	16005.1	5929.57	0.000223799		30867712, 27169579, 20530248, 29358958
hsa-miR-23b-3p	4480.46	3593.75	2542.3	1611.15	2.63795e-05	Promotes keratinocyte migration and wound healing	30188966, 32422429
hsa-miR-148b-3p	831.556	1331.48	902.036	626.678	0.00980782	Regulates angiogenesis and endothelial-to-mesenchymal transition	29843955
hsa-miR-20a-5p	1099.01	3332.37	2920.78	1676.24	0.000441832	Accelerates wound closure	32949564
hsa-miR-15b-5p	89.01	373.516	190.691	102.574	5.77487e-06	Suppresses agiogenesis, DNA repair, and inflammation in diabetic foot ulcers; inhibition of miR-15b promotes healing of diabetes-related wound disorders	29273315, 29178246, 25059098
hsa-miR-92a-3p	2278.72	6621.86	4529.7	2589.86	7.26307e-07	Its inhibitor accelerates angiogenesis and wound healing in diabetic and nondiabetic wounds	30118158, 28462946
hsa-miR-486-5p	1451.12	6619.58	4149.48	1262.65	0.000797668	Promotes angiogenesis and wound healing	32666704
hsa-miR-135a-3p	Not detected (N.D.)					Delays wound healing via regulating angiogenesis	30668922
hsa-miR-135a-5p	N.D.					Promotes fibroblast migration and wound healing in rats	32054526
hsa-miR-615-5p	N.D.					Inhibits endothelial cell proliferation, migration, network tube formation, its inhibitors increases angiogenesis, granulation tissue thickness, and wound closure rates in db/db mice.	31092013
hsa-miR-198	N.D.					Inhibits keratinocyte migration and re-epithelialization	23395958
hsa-miR-23c	N.D.					Inhibits angiogenesis	31520606
hsa-miR-4674	N.D.					Inhibits angiogenesis	31913696
